# Supplementary material for: Environmental Toxicant Induced Epigenetic Transgenerational Inheritance of Prostate Pathology and Stromal-Epithelial Cell Epigenome and Transcriptome Alterations: Ancestral Origins of Prostate Disease
Source: PubMed Central journal article supplement (PMC6379561; doi:10.1038/s41598-019-38741-1), 2019-02-18
Supplement: 41598_2019_38741_MOESM1_ESM.pdf [file 41598_2019_38741_MOESM1_ESM.pdf]

**Environmental Toxicant Induced Epigenetic Transgenerational Inheritance of Prostate Pathology and Stromal-Epithelial Cell Epigenome and Transcriptome Alterations: Ancestral Origins of Prostate Disease**

Rachel Klukovich<sup>2+</sup>, Eric Nilsson<sup>1+</sup>, Ingrid Sadler-Riggelman<sup>1</sup>, Daniel Beck<sup>1</sup>, Yeming Xie<sup>2</sup>, Wei Yan<sup>2++</sup>, Michael K. Skinner<sup>1++</sup>

<sup>1</sup>Center for Reproductive Biology  
School of Biological Sciences  
Washington State University  
Pullman, WA, 99164-4236, USA

<sup>2</sup>Department of Physiology and Cell Biology  
University of Nevada, Reno School of Medicine  
Reno, NV, 89557, USA

(<sup>+</sup>) Co-first authors

(<sup>++</sup>) Co-senior authors / Corresponding authors

**Supplemental Material**

## Supplemental Figure and Table Legends

**Supplemental Figure S1.** Representative rat ventral prostate histopathology from F3 generation vinclozolin lineage. (A) Normal prostate with single cuboidal to columnar epithelial layer for each gland. (B) Prostatic epithelial atrophy demonstrating flattened glandular epithelium (black arrow). (C) Epithelial layer vacuoles indicated by blue arrowheads showing empty spaces where epithelial cells have died or are missing. (D) Prostatic epithelial pseudo-stratification or hyperplasia (white arrow) showing multiple layers of epithelium were not counted as an abnormality. (E & F) Abnormal prostate hyperplasia (white arrows) were counted as histopathologies. White arrows showing where multiple layers of epithelium and hyperplasia are present. Black arrows indicate regions of epithelial atrophy. Scale bar = 100  $\mu$ m.

**Supplemental Figure S2.** Kegg pathways in cancer. The blue circles indicate DMR association and red circles mRNA association.

**Supplemental Table S1.** Site table vinclozolin DMR prostate epithelium 1e-06.

**Supplemental Table S2.** Site table vinclozolin DMR prostate stromal 1e-06.

**Supplemental Table S3.** Overlap DMR epithelium and stromal.

**Supplemental Table S4.** Site table sncRNA vinclozolin epithelium 0.001.

**Supplemental Table S5.** Site table sncRNA vinclozolin stromal 0.001.

**Supplemental Table S6.** Site table sncRNA overlap epithelium vs. stromal 0.001.

**Supplemental Table S7.** Site table lncRNA prostate epithelium 0.001.

**Supplemental Table S8.** Site table lncRNA prostate stromal 0.001.

**Supplemental Table S9.** Site table lncRNA prostate stromal vs. epithelium overlaps  
0.001.

**Supplemental Table S10.** Site table mRNA prostate epithelium 0.001.

**Supplemental Table S11.** Site table mRNA prostate stromal 0.001.

**Supplemental Table S12.** Site table mRNA prostate epithelium vs. stromal overlaps  
 $p < 0.001$ .

**Supplemental Table S13.** Prostate disease associated genes from literature <sup>67-85</sup>.

Supplemental Figure S1

Representative Prostate Histopathology

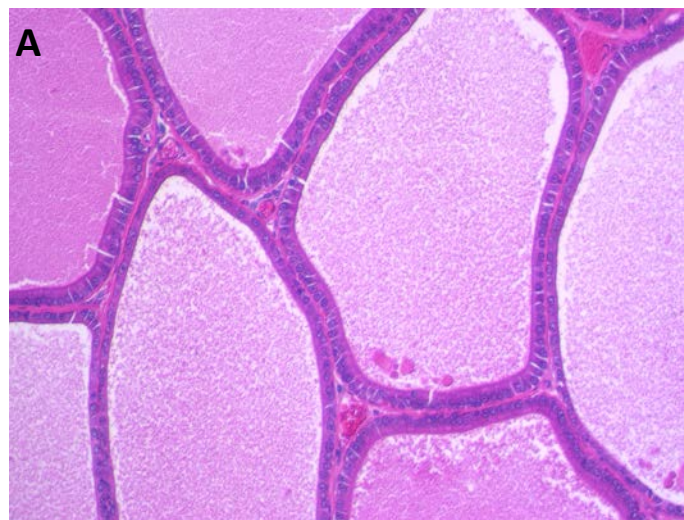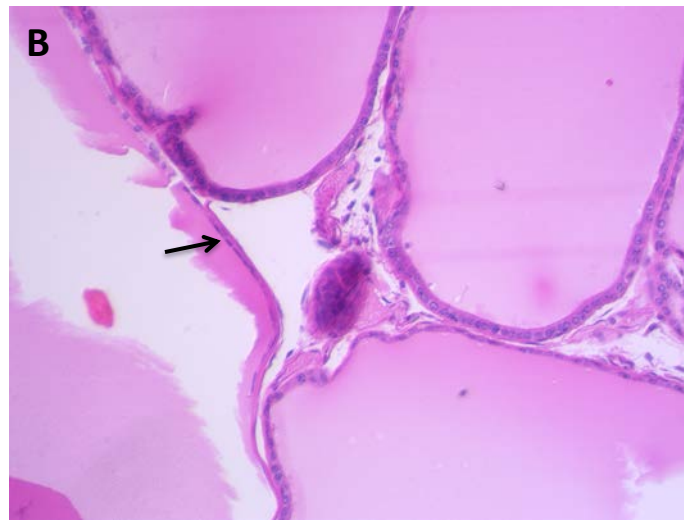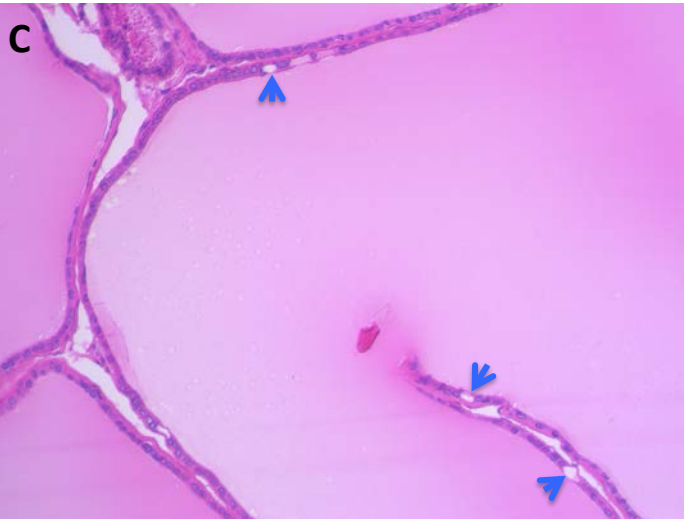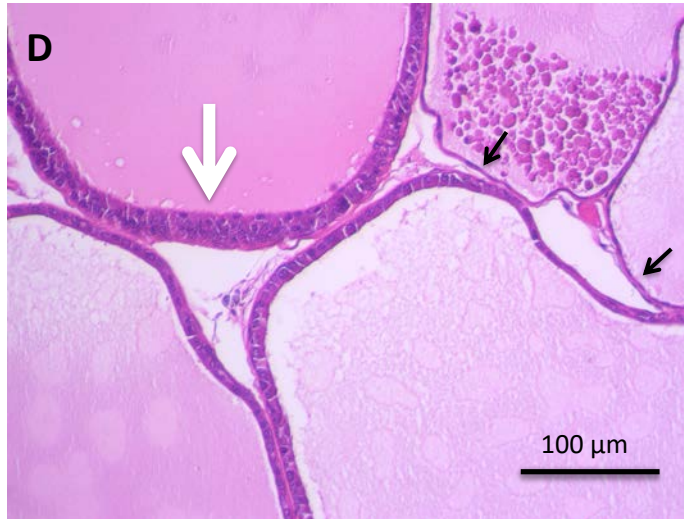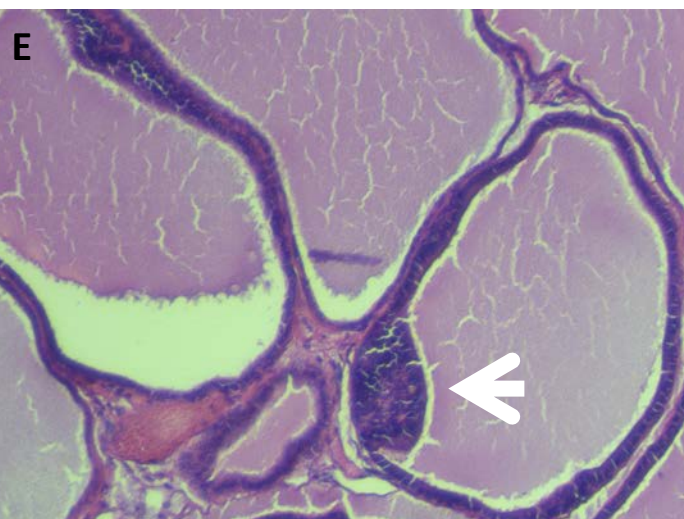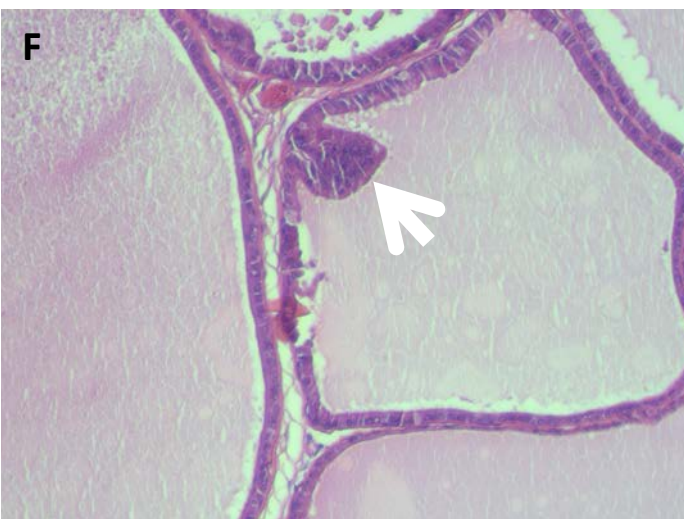



**Supplemental Table S1**

**Prostate Epithelial Cell DMR List (p<10<sup>-6</sup>)**

| DMR Name       | Chr | Start     | Length | #<br>SigWin | minP     | Ratio<br>Vin/Con | CpG # | CpG<br>Density | Annotation         | Category                   |
|----------------|-----|-----------|--------|-------------|----------|------------------|-------|----------------|--------------------|----------------------------|
| DMR1:5738301   | 1   | 5738301   | 200    | 2           | 3.26E-15 | 0.045            | 0     | 0              | SNORA17            |                            |
| DMR1:14646701  | 1   | 14646701  | 1100   | 1           | 2.10E-07 | 0.349            | 6     | 0.5455         |                    |                            |
| DMR1:21877701  | 1   | 21877701  | 1100   | 1           | 3.40E-07 | 0.409            | 5     | 0.4545         |                    |                            |
| DMR1:22736601  | 1   | 22736601  | 400    | 1           | 2.19E-19 | 0.254            | 2     | 0.5            | Slc18b1            |                            |
| DMR1:26631101  | 1   | 26631101  | 300    | 2           | 1.27E-08 | 5.043            | 1     | 0.3333         |                    |                            |
| DMR1:38338201  | 1   | 38338201  | 900    | 2           | 1.61E-08 | 3.442            | 6     | 0.6667         |                    |                            |
| DMR1:38431701  | 1   | 38431701  | 1200   | 1           | 6.35E-08 | 0.506            | 9     | 0.75           | pRNA               |                            |
| DMR1:41961301  | 1   | 41961301  | 1200   | 1           | 3.14E-08 | 11.966           | 3     | 0.25           | Syne1              | Development                |
| DMR1:47830701  | 1   | 47830701  | 400    | 1           | 2.61E-07 | 0.431            | 1     | 0.25           |                    |                            |
| DMR1:47883201  | 1   | 47883201  | 700    | 2           | 3.14E-08 | 0.298            | 10    | 1.4286         |                    |                            |
| DMR1:51417501  | 1   | 51417501  | 1300   | 1           | 6.15E-07 | 0.406            | 2     | 0.1538         |                    |                            |
| DMR1:55498001  | 1   | 55498001  | 300    | 1           | 1.05E-09 | 4.22             | 2     | 0.6667         |                    |                            |
| DMR1:70607201  | 1   | 70607201  | 800    | 1           | 2.81E-07 | 2.421            | 5     | 0.625          |                    |                            |
| DMR1:76761801  | 1   | 76761801  | 300    | 1           | 9.20E-10 | 0.218            | 2     | 0.6667         | LOC100912485       |                            |
| DMR1:78435101  | 1   | 78435101  | 300    | 1           | 4.57E-07 | 4.735            | 6     | 2              | Npas1              | Transcription              |
| DMR1:79664801  | 1   | 79664801  | 700    | 1           | 4.98E-07 | 3.112            | 7     | 1              | Mill1;5S_rRNA      |                            |
| DMR1:96331501  | 1   | 96331501  | 800    | 1           | 7.34E-07 | 4.255            | 3     | 0.375          |                    |                            |
| DMR1:96344001  | 1   | 96344001  | 1000   | 1           | 6.71E-07 | 2.314            | 8     | 0.8            |                    |                            |
| DMR1:101589701 | 1   | 101589701 | 300    | 1           | 2.19E-07 | 0.349            | 1     | 0.3333         | Fgf21;Fut1         | Metabolism                 |
| DMR1:105581201 | 1   | 105581201 | 300    | 1           | 3.30E-07 | 0.35             | 1     | 0.3333         | Nell1              | Development                |
| DMR1:116265801 | 1   | 116265801 | 1500   | 2           | 1.85E-07 | 2.288            | 20    | 1.3333         |                    |                            |
| DMR1:131238801 | 1   | 131238801 | 300    | 1           | 7.25E-07 | 0.407            | 0     | 0              |                    |                            |
| DMR1:143988101 | 1   | 143988101 | 300    | 1           | 4.48E-07 | 3.587            | 2     | 0.6667         |                    |                            |
| DMR1:159567101 | 1   | 159567101 | 400    | 1           | 8.96E-07 | 2.915            | 3     | 0.75           |                    |                            |
| DMR1:179199801 | 1   | 179199801 | 1900   | 1           | 1.35E-10 | 3.484            | 24    | 1.2632         |                    |                            |
| DMR1:179416901 | 1   | 179416901 | 2900   | 1           | 6.34E-07 | 2.418            | 24    | 0.8276         |                    |                            |
| DMR1:179687901 | 1   | 179687901 | 2500   | 2           | 2.76E-07 | 1.737            | 38    | 1.52           |                    |                            |
| DMR1:179697001 | 1   | 179697001 | 1700   | 1           | 6.23E-08 | 3.53             | 15    | 0.8824         |                    |                            |
| DMR1:180242101 | 1   | 180242101 | 2300   | 1           | 4.83E-09 | 3.24             | 36    | 1.5652         |                    |                            |
| DMR1:181560001 | 1   | 181560001 | 5300   | 1           | 6.20E-07 | 2.692            | 100   | 1.8868         |                    |                            |
| DMR1:197244801 | 1   | 197244801 | 400    | 1           | 8.76E-07 | 0.512            | 2     | 0.5            | LOC361646          |                            |
| DMR1:201861201 | 1   | 201861201 | 500    | 1           | 9.50E-07 | 0.349            | 5     | 1              | AC123083.1         |                            |
| DMR1:209021701 | 1   | 209021701 | 1200   | 1           | 8.35E-07 | 3.109            | 15    | 1.25           |                    |                            |
| DMR1:212412301 | 1   | 212412301 | 4200   | 1           | 1.10E-07 | 2.606            | 48    | 1.1429         |                    |                            |
| DMR1:212438801 | 1   | 212438801 | 600    | 1           | 9.66E-07 | 2.773            | 2     | 0.3333         |                    |                            |
| DMR1:223899701 | 1   | 223899701 | 1500   | 1           | 1.26E-07 | 3.505            | 35    | 2.3333         |                    |                            |
| DMR1:224072801 | 1   | 224072801 | 3500   | 1           | 3.35E-08 | 1.893            | 58    | 1.6571         |                    |                            |
| DMR1:225355401 | 1   | 225355401 | 200    | 1           | 1.00E-07 | 0.26             | 5     | 2.5            |                    |                            |
| DMR1:226232001 | 1   | 226232001 | 400    | 1           | 2.60E-07 | 5.35             | 8     | 2              | Fads1              | Metabolism                 |
| DMR1:229552801 | 1   | 229552801 | 300    | 2           | 5.29E-09 | 0.316            | 2     | 0.6667         | Glyat12            |                            |
| DMR1:263684201 | 1   | 263684201 | 900    | 1           | 1.88E-07 | 0.506            | 1     | 0.1111         | Dnmbp              | EST                        |
| DMR1:280046301 | 1   | 280046301 | 700    | 1           | 1.44E-08 | 0.249            | 0     | 0              |                    |                            |
| DMR2:13591401  | 2   | 13591401  | 100    | 1           | 6.64E-07 | 4.012            | 2     | 2              | Ccnh               | Cell Cycle                 |
| DMR2:20994801  | 2   | 20994801  | 2500   | 1           | 9.63E-07 | 2.917            | 54    | 2.16           |                    |                            |
| DMR2:49066801  | 2   | 49066801  | 500    | 1           | 5.12E-08 | 0.49             | 5     | 1              |                    |                            |
| DMR2:68828601  | 2   | 68828601  | 100    | 1           | 1.04E-07 | 0.127            | 0     | 0              | AABR07008655.1;Egf | Growth Factors & Cytokines |
| DMR2:94194201  | 2   | 94194201  | 400    | 1           | 1.63E-07 | 0.433            | 2     | 0.5            |                    |                            |

|                |   |           |       |   |          |        |     |        |                |                                |
|----------------|---|-----------|-------|---|----------|--------|-----|--------|----------------|--------------------------------|
| DMR2:104058801 | 2 | 104058801 | 200   | 1 | 8.07E-07 | 7.562  | 2   | 1      | Pde7a          | Signaling                      |
| DMR2:114916901 | 2 | 114916901 | 100   | 1 | 6.54E-07 | 3.057  | 0   | 0      |                |                                |
| DMR2:114943301 | 2 | 114943301 | 4200  | 2 | 5.82E-09 | 2.643  | 38  | 0.9048 |                |                                |
| DMR2:116260401 | 2 | 116260401 | 100   | 1 | 7.98E-07 | 3.643  | 0   | 0      | Samd7          |                                |
| DMR2:134802501 | 2 | 134802501 | 400   | 1 | 1.50E-07 | 3.466  | 4   | 1      |                |                                |
| DMR2:136116401 | 2 | 136116401 | 600   | 1 | 4.75E-08 | 0.169  | 7   | 1.1667 |                |                                |
| DMR2:141753001 | 2 | 141753001 | 1300  | 1 | 6.06E-07 | 0.371  | 9   | 0.6923 |                |                                |
| DMR2:141950101 | 2 | 141950101 | 700   | 2 | 4.10E-08 | 0.495  | 4   | 0.5714 |                |                                |
| DMR2:145253701 | 2 | 145253701 | 200   | 1 | 7.66E-12 | 0.253  | 0   | 0      |                |                                |
| DMR2:146483401 | 2 | 146483401 | 300   | 2 | 3.19E-09 | 0.254  | 3   | 1      |                |                                |
| DMR2:161037301 | 2 | 161037301 | 700   | 2 | 3.55E-11 | 2.673  | 11  | 1.5714 |                |                                |
| DMR2:161901901 | 2 | 161901901 | 1000  | 1 | 8.70E-09 | 2.057  | 10  | 1      |                |                                |
| DMR2:162151301 | 2 | 162151301 | 2300  | 1 | 6.13E-08 | 5.368  | 29  | 1.2609 |                |                                |
| DMR2:162414201 | 2 | 162414201 | 1300  | 2 | 1.35E-09 | 2.173  | 12  | 0.9231 |                |                                |
| DMR2:195076801 | 2 | 195076801 | 1000  | 1 | 1.60E-07 | 2.803  | 2   | 0.2    |                |                                |
| DMR2:206098801 | 2 | 206098801 | 500   | 1 | 3.26E-07 | 0.226  | 0   | 0      | Syt6           | Transport                      |
| DMR2:226852901 | 2 | 226852901 | 1400  | 1 | 6.20E-08 | 0.243  | 5   | 0.3571 |                |                                |
| DMR2:256984001 | 2 | 256984001 | 300   | 1 | 8.29E-07 | 0.351  | 0   | 0      | Ifi44l         | Immune                         |
| DMR2:258729201 | 2 | 258729201 | 2000  | 1 | 7.19E-08 | 2.907  | 34  | 1.7    |                |                                |
| DMR3:2243801   | 3 | 2243801   | 400   | 1 | 3.43E-07 | 0.524  | 0   | 0      | Pnpla7         | Metabolism                     |
| DMR3:2358201   | 3 | 2358201   | 500   | 1 | 6.37E-07 | 0.482  | 0   | 0      |                |                                |
| DMR3:9264201   | 3 | 9264201   | 100   | 1 | 4.63E-07 | 4.55   | 1   | 1      | Aif1l;Lamc3    | Signaling;Extracellular Matrix |
| DMR3:23694201  | 3 | 23694201  | 200   | 2 | 7.25E-15 | 0.067  | 2   | 1      |                |                                |
| DMR3:40739901  | 3 | 40739901  | 1200  | 1 | 1.41E-07 | 3.1    | 35  | 2.9167 |                |                                |
| DMR3:41320201  | 3 | 41320201  | 300   | 1 | 4.26E-08 | 2.236  | 3   | 1      |                |                                |
| DMR3:52071801  | 3 | 52071801  | 1200  | 1 | 1.36E-13 | 3.234  | 23  | 1.9167 | Csrnp3         | Unknown                        |
| DMR3:60951001  | 3 | 60951001  | 300   | 1 | 4.68E-07 | 0.538  | 2   | 0.6667 |                |                                |
| DMR3:60963601  | 3 | 60963601  | 400   | 2 | 2.17E-10 | 11.608 | 6   | 1.5    |                |                                |
| DMR3:64021701  | 3 | 64021701  | 300   | 1 | 2.40E-07 | 5.868  | 10  | 3.3333 | Ccdc141        | Cytoskeleton                   |
| DMR3:123623501 | 3 | 123623501 | 300   | 1 | 1.46E-07 | 0.327  | 3   | 1      | Siglec1        | Extracellular Matrix           |
| DMR3:132612001 | 3 | 132612001 | 400   | 2 | 1.93E-08 | 0.399  | 0   | 0      | Sptlc3         | Metabolism                     |
| DMR3:133507101 | 3 | 133507101 | 300   | 1 | 9.67E-07 | 2.309  | 2   | 0.6667 |                |                                |
| DMR3:139692901 | 3 | 139692901 | 400   | 1 | 2.58E-07 | 0.239  | 0   | 0      | Slc24a3        | Transport                      |
| DMR3:150569601 | 3 | 150569601 | 200   | 1 | 4.12E-07 | 0.422  | 0   | 0      | Asip           | Signaling                      |
| DMR3:159097301 | 3 | 159097301 | 500   | 1 | 2.82E-09 | 0.277  | 10  | 2      | LOC103694889   |                                |
| DMR3:159547401 | 3 | 159547401 | 1700  | 1 | 7.66E-07 | 4.495  | 33  | 1.9412 |                |                                |
| DMR3:160779101 | 3 | 160779101 | 2100  | 1 | 3.31E-08 | 0.227  | 13  | 0.619  | Slpil3         |                                |
| DMR3:168670901 | 3 | 168670901 | 800   | 1 | 1.86E-08 | 7.667  | 6   | 0.75   |                |                                |
| DMR3:168952801 | 3 | 168952801 | 300   | 1 | 6.78E-08 | 0.127  | 8   | 2.6667 |                |                                |
| DMR3:168987001 | 3 | 168987001 | 400   | 1 | 5.07E-07 | 0.352  | 2   | 0.5    |                |                                |
| DMR3:169465901 | 3 | 169465901 | 2300  | 1 | 6.80E-07 | 3.407  | 36  | 1.5652 |                |                                |
| DMR3:174392401 | 3 | 174392401 | 800   | 2 | 1.83E-08 | 3.259  | 11  | 1.375  |                |                                |
| DMR4:7597201   | 4 | 7597201   | 300   | 1 | 3.18E-07 | 0.318  | 1   | 0.3333 |                |                                |
| DMR4:26098601  | 4 | 26098601  | 200   | 1 | 4.06E-08 | 6.706  | 1   | 0.5    | Cdk14          | Cell Cycle                     |
| DMR4:30466001  | 4 | 30466001  | 300   | 1 | 5.64E-07 | 0.461  | 1   | 0.3333 | Asb4           | Protein Binding                |
| DMR4:32781301  | 4 | 32781301  | 200   | 1 | 9.80E-07 | 2.576  | 0   | 0      |                |                                |
| DMR4:53250101  | 4 | 53250101  | 200   | 1 | 7.17E-07 | 0.34   | 1   | 0.5    | AABR07060084.1 |                                |
| DMR4:58622401  | 4 | 58622401  | 400   | 1 | 2.52E-07 | 8.238  | 4   | 1      |                |                                |
| DMR4:71623201  | 4 | 71623201  | 200   | 1 | 6.09E-07 | 9.448  | 4   | 2      | Gstk1          | Binding Protein                |
| DMR4:77401101  | 4 | 77401101  | 11200 | 1 | 1.10E-08 | 0.607  | 368 | 3.2857 | AABR07060519.1 |                                |
| DMR4:80765501  | 4 | 80765501  | 300   | 1 | 7.61E-07 | 0.351  | 3   | 1      |                |                                |

|                |   |           |      |   |          |       |     |        |                                                |                         |
|----------------|---|-----------|------|---|----------|-------|-----|--------|------------------------------------------------|-------------------------|
| DMR4:115226301 | 4 | 115226301 | 1000 | 1 | 1.40E-07 | 6.508 | 5   | 0.5    | Actg2;AC115473.1                               | Cytoskeleton            |
| DMR4:125209901 | 4 | 125209901 | 2300 | 1 | 9.90E-07 | 2.96  | 29  | 1.2609 | AABR07061448.2                                 |                         |
| DMR4:126365101 | 4 | 126365101 | 300  | 1 | 4.99E-08 | 0.333 | 0   | 0      |                                                |                         |
| DMR4:129949701 | 4 | 129949701 | 300  | 1 | 6.13E-08 | 5.035 | 3   | 1      |                                                |                         |
| DMR4:147435301 | 4 | 147435301 | 800  | 1 | 1.29E-07 | 0.503 | 5   | 0.625  |                                                |                         |
| DMR4:158928401 | 4 | 158928401 | 600  | 2 | 2.53E-10 | 0.307 | 5   | 0.8333 |                                                |                         |
| DMR4:164695001 | 4 | 164695001 | 1100 | 1 | 3.39E-08 | 0.409 | 9   | 0.8182 | Ly49s4;Ly49i2                                  | Receptor                |
| DMR4:173488601 | 4 | 173488601 | 300  | 3 | 4.62E-13 | 0.016 | 9   | 3      |                                                |                         |
| DMR4:179152301 | 4 | 179152301 | 400  | 1 | 1.27E-09 | 0.451 | 1   | 0.25   |                                                |                         |
| DMR4:180738701 | 4 | 180738701 | 600  | 1 | 3.98E-07 | 9.265 | 7   | 1.1667 |                                                |                         |
| DMR5:4911101   | 5 | 4911101   | 1900 | 1 | 2.07E-07 | 3.358 | 14  | 0.7368 |                                                |                         |
| DMR5:2614901   | 5 | 2614901   | 300  | 2 | 2.73E-07 | 2.353 | 29  | 9.6667 | Rdh10;AABR07046713<br>.1                       | Metabolism              |
| DMR5:16658001  | 5 | 16658001  | 400  | 1 | 9.06E-07 | 4.333 | 7   | 1.75   |                                                |                         |
| DMR5:19302001  | 5 | 19302001  | 200  | 1 | 1.62E-07 | 4.059 | 3   | 1.5    | Ubxn2b                                         | Proteolysis             |
| DMR5:24896101  | 5 | 24896101  | 600  | 1 | 9.83E-07 | 3.768 | 5   | 0.8333 | RGD1559441                                     | Extracellular<br>Matrix |
| DMR5:31779601  | 5 | 31779601  | 500  | 1 | 1.51E-09 | 28.04 | 5   | 1      | Mmp16                                          | Proteolysis             |
| DMR5:45410601  | 5 | 45410601  | 500  | 1 | 1.04E-07 | 5.045 | 4   | 0.8    |                                                |                         |
| DMR5:57391201  | 5 | 57391201  | 400  | 1 | 2.68E-07 | 0.354 | 1   | 0.25   |                                                |                         |
| DMR5:60200801  | 5 | 60200801  | 400  | 1 | 1.06E-07 | 0.423 | 2   | 0.5    | Pax5                                           | Transcription           |
| DMR5:111459301 | 5 | 111459301 | 1000 | 1 | 1.55E-09 | 5.135 | 15  | 1.5    |                                                |                         |
| DMR5:118328601 | 5 | 118328601 | 300  | 1 | 1.38E-07 | 0.42  | 1   | 0.3333 |                                                |                         |
| DMR5:121133101 | 5 | 121133101 | 3000 | 1 | 6.67E-07 | 2.733 | 72  | 2.4    |                                                |                         |
| DMR5:124241401 | 5 | 124241401 | 600  | 1 | 7.05E-08 | 3.289 | 5   | 0.8333 | Dab1                                           | Signaling               |
| DMR5:135836401 | 5 | 135836401 | 1300 | 1 | 4.47E-07 | 0.486 | 16  | 1.2308 | Zswim5;AABR0707314<br>1.1                      | Transcription           |
| DMR5:137138701 | 5 | 137138701 | 1100 | 1 | 8.53E-07 | 0.332 | 15  | 1.3636 |                                                |                         |
| DMR5:138699301 | 5 | 138699301 | 2700 | 1 | 6.51E-07 | 0.4   | 15  | 0.5556 | Guca2b                                         | Signaling               |
| DMR5:140941101 | 5 | 140941101 | 1000 | 1 | 8.18E-08 | 5.837 | 4   | 0.4    | Heyl                                           | Transcription           |
| DMR5:147047301 | 5 | 147047301 | 600  | 1 | 7.25E-07 | 0.312 | 1   | 0.1667 |                                                |                         |
| DMR5:148504701 | 5 | 148504701 | 1100 | 1 | 3.08E-07 | 0.404 | 7   | 0.6364 | AABR07050017.2;AAB<br>R07050017.1;SCARNA<br>16 |                         |
| DMR5:152428601 | 5 | 152428601 | 200  | 1 | 5.23E-07 | 0.199 | 6   | 3      | Umodl;Catsper4                                 | Transport               |
| DMR6:16260701  | 6 | 16260701  | 2300 | 1 | 7.16E-08 | 3.973 | 22  | 0.9565 |                                                |                         |
| DMR6:16595801  | 6 | 16595801  | 3400 | 1 | 4.77E-07 | 2.472 | 48  | 1.4118 |                                                |                         |
| DMR6:17053501  | 6 | 17053501  | 700  | 3 | 1.03E-07 | 4.793 | 16  | 2.2857 |                                                |                         |
| DMR6:25293501  | 6 | 25293501  | 300  | 1 | 1.56E-07 | 3.591 | 4   | 1.3333 | Srd5a2                                         | Metabolism              |
| DMR6:31062601  | 6 | 31062601  | 9300 | 2 | 3.77E-08 | 0.598 | 169 | 1.8172 |                                                |                         |
| DMR6:38923701  | 6 | 38923701  | 800  | 1 | 5.93E-07 | 2.199 | 42  | 5.25   |                                                |                         |
| DMR6:51253101  | 6 | 51253101  | 700  | 1 | 1.24E-07 | 0.392 | 2   | 0.2857 | Hbp1                                           | Transcription           |
| DMR6:52528101  | 6 | 52528101  | 400  | 1 | 4.20E-07 | 4.918 | 11  | 2.75   | Atxn7l1                                        | Development             |
| DMR6:65095701  | 6 | 65095701  | 200  | 1 | 7.04E-07 | 0.336 | 0   | 0      | Stxbp6                                         | Receptor                |
| DMR6:130196601 | 6 | 130196601 | 800  | 1 | 9.38E-07 | 3.173 | 4   | 0.5    | AABR07065476.2;AAB<br>R07065476.1              |                         |
| DMR6:133952401 | 6 | 133952401 | 300  | 1 | 6.99E-07 | 6.413 | 4   | 1.3333 |                                                |                         |
| DMR6:134504101 | 6 | 134504101 | 1100 | 2 | 3.28E-09 | 0.514 | 26  | 2.3636 |                                                |                         |
| DMR6:137030301 | 6 | 137030301 | 400  | 1 | 1.40E-07 | 6.191 | 8   | 2      |                                                |                         |
| DMR6:145762801 | 6 | 145762801 | 1000 | 1 | 1.74E-09 | 7.246 | 9   | 0.9    | Cdca7l                                         |                         |
| DMR7:21704301  | 7 | 21704301  | 1600 | 1 | 7.56E-07 | 4.393 | 8   | 0.5    |                                                |                         |
| DMR7:21714101  | 7 | 21714101  | 2500 | 4 | 4.88E-08 | 1.979 | 38  | 1.52   |                                                |                         |
| DMR7:21906601  | 7 | 21906601  | 1200 | 1 | 9.08E-07 | 3.231 | 4   | 0.3333 |                                                |                         |



|                 |    |           |      |   |          |        |    |        |                 |                       |
|-----------------|----|-----------|------|---|----------|--------|----|--------|-----------------|-----------------------|
| DMR7:23624201   | 7  | 23624201  | 300  | 1 | 3.30E-07 | 0.328  | 15 | 5      | Syn3            | Development           |
| DMR7:26840601   | 7  | 26840601  | 800  | 2 | 1.42E-08 | 5.398  | 5  | 0.625  | Chst11          | Metabolism            |
| DMR7:30748101   | 7  | 30748101  | 1500 | 1 | 3.69E-07 | 7.084  | 5  | 0.3333 | Anks1b          | Receptor              |
| DMR7:53502501   | 7  | 53502501  | 200  | 1 | 2.43E-08 | 2.801  | 1  | 0.5    |                 |                       |
| DMR7:114696001  | 7  | 114696001 | 200  | 1 | 5.47E-07 | 6.738  | 3  | 1.5    | AABR07058406.1  |                       |
| DMR7:115169901  | 7  | 115169901 | 600  | 1 | 6.62E-08 | 5.066  | 4  | 0.6667 |                 |                       |
| DMR7:119494001  | 7  | 119494001 | 900  | 1 | 3.38E-07 | 0.352  | 4  | 0.4444 | Ncf4            | Development           |
| DMR7:120510801  | 7  | 120510801 | 300  | 1 | 5.30E-07 | 0.295  | 6  | 2      | Baiap2l2;Pla2g6 | Receptor;Metabolism   |
| DMR7:121631101  | 7  | 121631101 | 200  | 2 | 1.59E-08 | 0.37   | 6  | 3      |                 |                       |
| DMR7:125729701  | 7  | 125729701 | 100  | 1 | 7.34E-07 | 0.244  | 0  | 0      | Arhgap8         | Signaling             |
| DMR7:138862001  | 7  | 138862001 | 1000 | 1 | 2.31E-08 | 0.347  | 10 | 1      |                 |                       |
| DMR8:8224501    | 8  | 8224501   | 300  | 1 | 2.88E-07 | 0.472  | 10 | 3.3333 | Cntn5           | Extracellular Matrix  |
| DMR8:10620301   | 8  | 10620301  | 3500 | 1 | 1.16E-07 | 3.577  | 21 | 0.6    |                 |                       |
| DMR8:10628701   | 8  | 10628701  | 900  | 1 | 1.15E-07 | 2.092  | 8  | 0.8889 |                 |                       |
| DMR8:12109201   | 8  | 12109201  | 800  | 1 | 1.46E-07 | 0.663  | 2  | 0.25   | Maml2           | Transcription         |
| DMR8:14259101   | 8  | 14259101  | 600  | 2 | 8.22E-13 | 0.543  | 26 | 4.3333 | Slc36a4         | Transport             |
| DMR8:23010501   | 8  | 23010501  | 600  | 1 | 2.75E-07 | 0.45   | 0  | 0      | Ccdc151;PrkcsH  | Signaling             |
| DMR8:43681601   | 8  | 43681601  | 1200 | 1 | 9.92E-07 | 2.959  | 28 | 2.3333 | Olr1323         |                       |
| DMR8:43875701   | 8  | 43875701  | 1700 | 1 | 5.76E-07 | 3.085  | 73 | 4.2941 | Olr1337         | Receptor              |
| DMR8:45106101   | 8  | 45106101  | 300  | 1 | 5.80E-07 | 0.488  | 0  | 0      | RGD1309108      | Unknown               |
| DMR8:84748701   | 8  | 84748701  | 200  | 1 | 2.60E-07 | 5.529  | 1  | 0.5    | Lrrc1           | Unknown               |
| DMR8:88267801   | 8  | 88267801  | 400  | 1 | 3.59E-07 | 0.504  | 3  | 0.75   |                 |                       |
| DMR8:125831901  | 8  | 125831901 | 400  | 1 | 3.97E-07 | 0.317  | 5  | 1.25   |                 |                       |
| DMR8:127473901  | 8  | 127473901 | 1100 | 3 | 2.12E-07 | 0.183  | 1  | 0.0909 | Itga9           | Extracellular Matrix  |
| DMR8:130124301  | 8  | 130124301 | 300  | 1 | 4.38E-07 | 0.445  | 5  | 1.6667 | Cck             | Signaling             |
| DMR9:10507301   | 9  | 10507301  | 400  | 1 | 9.67E-07 | 0.595  | 1  | 0.25   |                 |                       |
| DMR9:14792201   | 9  | 14792201  | 1400 | 1 | 7.65E-07 | 2.063  | 20 | 1.4286 | Trem1           |                       |
| DMR9:20296001   | 9  | 20296001  | 1500 | 1 | 8.21E-07 | 2.492  | 51 | 3.4    |                 |                       |
| DMR9:21455101   | 9  | 21455101  | 1700 | 1 | 1.72E-11 | 2.706  | 32 | 1.8824 |                 |                       |
| DMR9:21978901   | 9  | 21978901  | 500  | 1 | 9.26E-08 | 7.748  | 1  | 0.2    |                 |                       |
| DMR9:23467501   | 9  | 23467501  | 200  | 1 | 1.72E-08 | 10.164 | 3  | 1.5    | Rhag            | Transport             |
| DMR9:31846801   | 9  | 31846801  | 100  | 1 | 2.23E-08 | 0.287  | 2  | 2      | Adgrb3          |                       |
| DMR9:37869001   | 9  | 37869001  | 800  | 1 | 7.06E-07 | 2.943  | 5  | 0.625  |                 |                       |
| DMR9:65973601   | 9  | 65973601  | 400  | 1 | 7.60E-07 | 4.92   | 4  | 1      | Als2            | Signaling             |
| DMR9:97314501   | 9  | 97314501  | 2400 | 1 | 9.26E-07 | 1.645  | 25 | 1.0417 |                 |                       |
| DMR10:5412401   | 10 | 5412401   | 200  | 1 | 4.24E-09 | 0.303  | 0  | 0      |                 |                       |
| DMR10:18600401  | 10 | 18600401  | 1500 | 1 | 1.09E-07 | 2.69   | 7  | 0.4667 | Kcnp1           | Signaling             |
| DMR10:27527501  | 10 | 27527501  | 300  | 1 | 4.47E-07 | 0.291  | 1  | 0.3333 |                 |                       |
| DMR10:37381101  | 10 | 37381101  | 500  | 3 | 7.34E-08 | 0.441  | 0  | 0      |                 |                       |
| DMR10:67005201  | 10 | 67005201  | 100  | 1 | 6.30E-07 | 6.065  | 3  | 3      | Rab11fip4       | Unknown               |
| DMR10:80749001  | 10 | 80749001  | 400  | 1 | 8.69E-07 | 3.024  | 0  | 0      |                 |                       |
| DMR10:86380901  | 10 | 86380901  | 1100 | 1 | 3.39E-07 | 0.308  | 0  | 0      | ErbB2;U6;Mien1  | Receptor              |
| DMR10:87973701  | 10 | 87973701  | 300  | 1 | 2.74E-07 | 0.353  | 0  | 0      |                 |                       |
| DMR10:88237001  | 10 | 88237001  | 200  | 1 | 4.56E-07 | 0.417  | 2  | 1      | Eif1;Gast       | Translation;Signaling |
| DMR10:95125601  | 10 | 95125601  | 500  | 1 | 7.62E-08 | 0.406  | 2  | 0.4    | AABR07030593.1  |                       |
| DMR10:97784701  | 10 | 97784701  | 300  | 1 | 2.05E-07 | 0.223  | 0  | 0      | Arsg            | Metabolism            |
| DMR10:101715601 | 10 | 101715601 | 700  | 1 | 2.94E-07 | 0.407  | 4  | 0.5714 |                 |                       |
| DMR10:106589301 | 10 | 106589301 | 500  | 1 | 6.68E-08 | 0.424  | 5  | 1      |                 |                       |

|                |    |          |       |   |          |       |     |        |                                                      |                        |
|----------------|----|----------|-------|---|----------|-------|-----|--------|------------------------------------------------------|------------------------|
| DMR11:65056801 | 11 | 65056801 | 500   | 1 | 1.20E-07 | 0.414 | 1   | 0.2    | Nr1i2;Gsk3b                                          | Receptor;Signalin<br>g |
| DMR11:81952601 | 11 | 81952601 | 300   | 1 | 6.94E-07 | 5.868 | 5   | 1.6667 |                                                      |                        |
| DMR12:1341101  | 12 | 1341101  | 600   | 1 | 7.56E-07 | 4.573 | 6   | 1      |                                                      |                        |
| DMR12:6654001  | 12 | 6654001  | 600   | 1 | 2.01E-07 | 0.376 | 3   | 0.5    |                                                      |                        |
| DMR12:8137201  | 12 | 8137201  | 200   | 1 | 4.01E-10 | 0.098 | 2   | 1      | Mtus2                                                | Cytoskeleton           |
| DMR12:11273501 | 12 | 11273501 | 400   | 2 | 7.05E-11 | 0.314 | 9   | 2.25   | Arpc1b;Arpc1a                                        | Cytoskeleton           |
| DMR12:12601401 | 12 | 12601401 | 1000  | 1 | 4.86E-11 | 4.169 | 4   | 0.4    |                                                      |                        |
| DMR12:21240601 | 12 | 21240601 | 600   | 1 | 1.47E-07 | 2.989 | 13  | 2.1667 |                                                      |                        |
| DMR12:22535701 | 12 | 22535701 | 1300  | 1 | 2.39E-08 | 0.491 | 16  | 1.2308 | AABR07035790.1;AAB<br>R07035790.2;AABR07<br>035791.1 |                        |
| DMR12:38188801 | 12 | 38188801 | 1300  | 1 | 4.47E-07 | 0.137 | 23  | 1.7692 |                                                      |                        |
| DMR12:40097301 | 12 | 40097301 | 400   | 1 | 1.56E-07 | 0.373 | 1   | 0.25   | Cux2                                                 | Development            |
| DMR12:42433301 | 12 | 42433301 | 400   | 1 | 8.54E-08 | 0.334 | 0   | 0      |                                                      |                        |
| DMR12:44893501 | 12 | 44893501 | 400   | 1 | 6.13E-07 | 0.497 | 5   | 1.25   | Ksr2;Rn50_12_0468.1;<br>SNORA44                      | Signaling              |
| DMR12:45279801 | 12 | 45279801 | 300   | 1 | 7.25E-08 | 3.073 | 2   | 0.6667 |                                                      |                        |
| DMR12:45281401 | 12 | 45281401 | 300   | 1 | 1.64E-09 | 0.093 | 0   | 0      |                                                      |                        |
| DMR12:45891101 | 12 | 45891101 | 1200  | 1 | 6.80E-07 | 3.376 | 15  | 1.25   | Srrm4                                                | Translation            |
| DMR12:46622801 | 12 | 46622801 | 800   | 1 | 3.09E-07 | 0.377 | 11  | 1.375  | Bicdl1                                               |                        |
| DMR12:50526701 | 12 | 50526701 | 900   | 4 | 4.00E-13 | 2.441 | 9   | 1      |                                                      |                        |
| DMR12:50774501 | 12 | 50774501 | 2900  | 2 | 8.59E-08 | 3.237 | 47  | 1.6207 |                                                      |                        |
| DMR13:19628701 | 13 | 19628701 | 2400  | 2 | 3.28E-09 | 3.495 | 37  | 1.5417 |                                                      |                        |
| DMR13:19657901 | 13 | 19657901 | 2500  | 3 | 2.55E-08 | 1.863 | 38  | 1.52   |                                                      |                        |
| DMR13:19663701 | 13 | 19663701 | 2000  | 3 | 2.79E-07 | 2.798 | 9   | 0.45   |                                                      |                        |
| DMR13:50182201 | 13 | 50182201 | 600   | 1 | 2.14E-10 | 0.445 | 5   | 0.8333 | Lax1                                                 |                        |
| DMR13:70572601 | 13 | 70572601 | 1800  | 1 | 6.87E-09 | 0.515 | 20  | 1.1111 | Lamc2                                                | Cytoskeleton           |
| DMR13:75158801 | 13 | 75158801 | 1200  | 1 | 3.99E-07 | 0.327 | 12  | 1      | Rn50_13_0801.2;Rn50<br>_13_0801.3                    |                        |
| DMR13:75608801 | 13 | 75608801 | 200   | 1 | 1.35E-07 | 0.26  | 0   | 0      |                                                      |                        |
| DMR13:93431701 | 13 | 93431701 | 400   | 1 | 5.39E-09 | 0.447 | 15  | 3.75   |                                                      |                        |
| DMR14:1157901  | 14 | 1157901  | 1300  | 1 | 9.52E-07 | 6.297 | 34  | 2.6154 |                                                      |                        |
| DMR14:3415101  | 14 | 3415101  | 2100  | 1 | 1.03E-07 | 0.442 | 9   | 0.4286 | Brdt                                                 | Epigenetic             |
| DMR14:8435201  | 14 | 8435201  | 300   | 1 | 5.47E-07 | 6.423 | 7   | 2.3333 | Arhgap24;Rn60_14_0<br>085.1                          | Unknown                |
| DMR14:22407301 | 14 | 22407301 | 2100  | 1 | 5.74E-07 | 2.967 | 12  | 0.5714 | Ugt2a1;Ugt2b37                                       | Metabolism             |
| DMR14:24970001 | 14 | 24970001 | 1100  | 1 | 7.40E-07 | 3.236 | 37  | 3.3636 |                                                      |                        |
| DMR14:28201301 | 14 | 28201301 | 300   | 1 | 7.56E-07 | 4.341 | 1   | 0.3333 |                                                      |                        |
| DMR14:33641001 | 14 | 33641001 | 500   | 1 | 7.43E-07 | 2.914 | 12  | 2.4    | Aasdh;RGD1311575                                     | Metabolism             |
| DMR14:46551601 | 14 | 46551601 | 4000  | 1 | 2.28E-07 | 0.592 | 60  | 1.5    |                                                      |                        |
| DMR14:46590301 | 14 | 46590301 | 25100 | 1 | 2.64E-07 | 0.61  | 555 | 2.2112 | pRNA;AABR07015066.<br>1;LOC257642;AABR07<br>015067.1 |                        |
| DMR14:94809901 | 14 | 94809901 | 400   | 1 | 8.25E-07 | 1.94  | 7   | 1.75   |                                                      |                        |
| DMR14:94878701 | 14 | 94878701 | 1200  | 1 | 4.84E-07 | 3.627 | 15  | 1.25   |                                                      |                        |
| DMR14:96914301 | 14 | 96914301 | 500   | 1 | 1.68E-07 | 2.154 | 15  | 3      |                                                      |                        |
| DMR15:2193401  | 15 | 2193401  | 300   | 2 | 6.67E-08 | 0.465 | 0   | 0      |                                                      |                        |
| DMR15:2943801  | 15 | 2943801  | 500   | 1 | 3.66E-08 | 5.511 | 7   | 1.4    | Kat6b                                                | Epigenetic             |
| DMR15:21524001 | 15 | 21524001 | 2100  | 1 | 5.71E-07 | 2.691 | 19  | 0.9048 |                                                      |                        |
| DMR15:21762201 | 15 | 21762201 | 1200  | 1 | 4.00E-08 | 3.609 | 10  | 0.8333 |                                                      |                        |
| DMR15:23010301 | 15 | 23010301 | 3900  | 3 | 1.94E-08 | 2.027 | 79  | 2.0256 |                                                      |                        |
| DMR15:23024501 | 15 | 23024501 | 1100  | 2 | 2.03E-10 | 1.999 | 15  | 1.3636 |                                                      |                        |

|                 |    |           |      |   |          |        |    |        |                |                      |
|-----------------|----|-----------|------|---|----------|--------|----|--------|----------------|----------------------|
| DMR15:35956601  | 15 | 35956601  | 200  | 1 | 9.18E-07 | 0.245  | 1  | 0.5    | AC114070.1     |                      |
| DMR15:40212401  | 15 | 40212401  | 1000 | 1 | 7.67E-07 | 0.376  | 2  | 0.2    | Atp8a2         | Transport            |
| DMR15:42728801  | 15 | 42728801  | 900  | 1 | 2.83E-07 | 3.45   | 19 | 2.1111 | Adam2          | Protease             |
| DMR15:51527001  | 15 | 51527001  | 1200 | 1 | 4.47E-07 | 7.678  | 9  | 0.75   | Pebp4          | Binding Protein      |
| DMR15:65004501  | 15 | 65004501  | 2400 | 1 | 2.93E-08 | 3.651  | 34 | 1.4167 |                |                      |
| DMR15:65159001  | 15 | 65159001  | 800  | 1 | 6.38E-08 | 4.464  | 2  | 0.25   |                |                      |
| DMR15:65193301  | 15 | 65193301  | 300  | 1 | 2.70E-07 | 2.836  | 0  | 0      | AABR07018574.1 |                      |
| DMR15:65198801  | 15 | 65198801  | 5400 | 1 | 7.83E-10 | 2.962  | 63 | 1.1667 | AABR07018574.1 |                      |
| DMR15:65208101  | 15 | 65208101  | 1400 | 1 | 5.26E-07 | 2.478  | 25 | 1.7857 |                |                      |
| DMR15:71954201  | 15 | 71954201  | 600  | 1 | 8.78E-07 | 3.648  | 17 | 2.8333 |                |                      |
| DMR15:100725101 | 15 | 100725101 | 200  | 1 | 4.41E-09 | 0.307  | 2  | 1      |                |                      |
| DMR15:106781201 | 15 | 106781201 | 600  | 1 | 7.30E-07 | 0.463  | 2  | 0.3333 |                |                      |
| DMR16:1819501   | 16 | 1819501   | 700  | 1 | 3.10E-07 | 3.514  | 16 | 2.2857 | Zmiz1;Mir3075  | Metabolism           |
| DMR16:17679801  | 16 | 17679801  | 400  | 1 | 8.45E-07 | 0.483  | 0  | 0      | Sh2d4b         |                      |
| DMR16:20898801  | 16 | 20898801  | 400  | 1 | 2.49E-08 | 8.511  | 2  | 0.5    | Homer3         | Signaling            |
| DMR16:30801501  | 16 | 30801501  | 2000 | 1 | 9.07E-07 | 2.48   | 22 | 1.1    |                |                      |
| DMR16:46792901  | 16 | 46792901  | 300  | 1 | 1.70E-07 | 4.969  | 4  | 1.3333 | Tenm3          |                      |
| DMR16:79332301  | 16 | 79332301  | 200  | 1 | 5.47E-07 | 0.174  | 4  | 2      |                |                      |
| DMR16:80298801  | 16 | 80298801  | 100  | 1 | 5.09E-07 | 0.134  | 0  | 0      |                |                      |
| DMR17:5516201   | 17 | 5516201   | 1700 | 1 | 7.64E-07 | 0.4    | 26 | 1.5294 | Agtppb1        | Signaling            |
| DMR17:23552901  | 17 | 23552901  | 300  | 1 | 4.83E-07 | 0.245  | 2  | 0.6667 |                |                      |
| DMR17:43355501  | 17 | 43355501  | 300  | 1 | 1.07E-07 | 0.344  | 1  | 0.3333 | Scgn           | Signaling            |
| DMR17:63750201  | 17 | 63750201  | 200  | 1 | 3.18E-07 | 0.32   | 1  | 0.5    | Dip2c          |                      |
| DMR17:72404401  | 17 | 72404401  | 2100 | 1 | 2.44E-07 | 11.509 | 48 | 2.2857 |                |                      |
| DMR17:77710201  | 17 | 77710201  | 700  | 1 | 6.74E-08 | 15     | 8  | 1.1429 |                |                      |
| DMR17:81182401  | 17 | 81182401  | 1200 | 1 | 1.35E-07 | 0.513  | 21 | 1.75   | Hacd1          |                      |
| DMR17:82084601  | 17 | 82084601  | 1200 | 1 | 1.37E-07 | 0.471  | 22 | 1.8333 | Arl5b          | Translation          |
| DMR17:86588801  | 17 | 86588801  | 100  | 1 | 5.48E-07 | 0.203  | 2  | 2      | AABR07028793.1 |                      |
| DMR18:15602601  | 18 | 15602601  | 200  | 1 | 2.41E-07 | 3.355  | 8  | 4      | Dsg2           | Extracellular Matrix |
| DMR18:51384401  | 18 | 51384401  | 700  | 1 | 6.94E-07 | 2.088  | 13 | 1.8571 |                |                      |
| DMR18:64122001  | 18 | 64122001  | 900  | 1 | 7.66E-07 | 0.243  | 9  | 1      | Mc5r           | Receptor             |
| DMR18:72400001  | 18 | 72400001  | 500  | 1 | 1.40E-07 | 6.243  | 6  | 1.2    | Zbtb7c         | Transcription        |
| DMR18:75150001  | 18 | 75150001  | 400  | 1 | 9.28E-07 | 0.382  | 1  | 0.25   | Setbp1         | Transcription        |
| DMR18:78952501  | 18 | 78952501  | 800  | 1 | 8.24E-07 | 0.458  | 2  | 0.25   | AABR07032747.1 |                      |
| DMR18:79089601  | 18 | 79089601  | 800  | 1 | 4.09E-07 | 0.196  | 21 | 2.625  |                |                      |
| DMR18:79299701  | 18 | 79299701  | 600  | 1 | 1.94E-07 | 0.459  | 1  | 0.1667 |                |                      |
| DMR18:79438201  | 18 | 79438201  | 1100 | 1 | 2.24E-07 | 2.645  | 10 | 0.9091 | Mbp            | Unknown              |
| DMR18:79804201  | 18 | 79804201  | 500  | 1 | 4.27E-08 | 0.377  | 0  | 0      | Zfp516         | Transcription        |
| DMR18:80608001  | 18 | 80608001  | 2500 | 1 | 7.77E-10 | 0.376  | 71 | 2.84   |                |                      |
| DMR18:87797401  | 18 | 87797401  | 900  | 1 | 9.01E-12 | 2.744  | 9  | 1      |                |                      |
| DMR18:87820801  | 18 | 87820801  | 100  | 1 | 1.07E-07 | 9.643  | 1  | 1      |                |                      |
| DMR18:87853601  | 18 | 87853601  | 900  | 1 | 3.35E-07 | 2.061  | 39 | 4.3333 |                |                      |
| DMR19:3943801   | 19 | 3943801   | 300  | 1 | 9.85E-08 | 3.062  | 1  | 0.3333 |                |                      |
| DMR19:14401801  | 19 | 14401801  | 100  | 1 | 3.01E-09 | 0.129  | 2  | 2      | Tom1           | Signaling            |
| DMR19:15937901  | 19 | 15937901  | 400  | 1 | 2.49E-08 | 0.149  | 0  | 0      |                |                      |
| DMR19:18012901  | 19 | 18012901  | 200  | 1 | 5.86E-07 | 0.323  | 1  | 0.5    | AABR07043031.3 |                      |
| DMR19:38934801  | 19 | 38934801  | 700  | 3 | 2.18E-13 | 0.193  | 3  | 0.4286 | Tango6         |                      |
| DMR19:53473901  | 19 | 53473901  | 500  | 1 | 6.53E-07 | 0.542  | 6  | 1.2    | LOC687560      |                      |
| DMR19:54053501  | 19 | 54053501  | 500  | 2 | 5.63E-07 | 0.513  | 2  | 0.4    | Gse1           | Transcription        |
| DMR19:57373401  | 19 | 57373401  | 700  | 1 | 5.36E-07 | 0.367  | 4  | 0.5714 | Capn9          | Protease             |

|                |    |           |     |   |          |       |    |        |                                                                     |            |
|----------------|----|-----------|-----|---|----------|-------|----|--------|---------------------------------------------------------------------|------------|
| DMR20:3145001  | 20 | 3145001   | 500 | 1 | 3.03E-09 | 0.448 | 4  | 0.8    | Rps2-ps2;RGD1562652;AABR07044362.1;RT1-N2                           | Immune     |
| DMR20:3164201  | 20 | 3164201   | 300 | 2 | 3.21E-10 | 0.35  | 1  | 0.3333 | AABR07044362.1;RT1-S2;Rps2-ps1;Rn50_20_0053.5;RT1-N3;Rn60_20_0032.5 | Immune     |
| DMR20:3526801  | 20 | 3526801   | 500 | 1 | 1.65E-07 | 0.332 | 4  | 0.8    | AABR07044367.1                                                      |            |
| DMR20:3684701  | 20 | 3684701   | 400 | 1 | 6.73E-07 | 0.44  | 3  | 0.75   | Mt1m;Rn50_20_0058.4                                                 | Receptor   |
| DMR20:11692501 | 20 | 11692501  | 300 | 1 | 4.86E-07 | 9.023 | 4  | 1.3333 | Ube2g2                                                              | Metabolism |
| DMR20:13017301 | 20 | 13017301  | 300 | 1 | 7.53E-07 | 3.413 | 6  | 2      | Pcnt                                                                | Signaling  |
| DMR20:40405401 | 20 | 40405401  | 300 | 2 | 1.41E-07 | 0.441 | 1  | 0.3333 | Hs3st5                                                              | Metabolism |
| DMR20:40852401 | 20 | 40852401  | 200 | 1 | 2.34E-07 | 3.044 | 0  | 0      |                                                                     |            |
| DMR20:44787701 | 20 | 44787701  | 300 | 1 | 3.17E-07 | 0.474 | 0  | 0      |                                                                     |            |
| DMR20:45007301 | 20 | 45007301  | 200 | 1 | 3.41E-09 | 0.427 | 1  | 0.5    | Mfsd4b;RGD1304770                                                   |            |
| DMR20:50997701 | 20 | 50997701  | 400 | 1 | 1.66E-07 | 0.554 | 0  | 0      |                                                                     |            |
| DMRX:291701    | X  | 291701    | 900 | 1 | 3.38E-07 | 2.872 | 10 | 1.1111 |                                                                     |            |
| DMRX:5511601   | X  | 5511601   | 600 | 1 | 2.99E-08 | 3.732 | 7  | 1.1667 |                                                                     |            |
| DMRX:36455601  | X  | 36455601  | 800 | 2 | 5.86E-08 | 2.717 | 17 | 2.125  |                                                                     |            |
| DMRX:114716501 | X  | 114716501 | 300 | 1 | 3.59E-07 | 0.382 | 0  | 0      |                                                                     |            |
| DMRX:136769601 | X  | 136769601 | 200 | 1 | 8.35E-08 | 0.171 | 0  | 0      |                                                                     |            |

## Supplemental Table S2

Prostate Stromal Cell DMR List (p<10<sup>-6</sup>)

| DMR Name      | Chr | Start    | Length | #<br>SigWin | minP     | Ratio<br>Vin/Con | CpG # | CpG<br>Density | Annotation                                                  | Category                    |
|---------------|-----|----------|--------|-------------|----------|------------------|-------|----------------|-------------------------------------------------------------|-----------------------------|
| DMR1:48701    | 1   | 48701    | 1800   | 1           | 1.59E-07 | 0.611            | 25    | 1.3889         |                                                             |                             |
| DMR1:270401   | 1   | 270401   | 600    | 1           | 7.14E-07 | 0.63             | 4     | 0.6667         |                                                             |                             |
| DMR1:5738301  | 1   | 5738301  | 100    | 1           | 1.41E-17 | 0.012            | 0     | 0              | SNORA17                                                     |                             |
| DMR1:6122201  | 1   | 6122201  | 500    | 2           | 8.72E-09 | 0.511            | 0     | 0              |                                                             |                             |
| DMR1:7175601  | 1   | 7175601  | 2600   | 1           | 4.79E-07 | 3.681            | 22    | 0.8462         | AABR07000257.1                                              |                             |
| DMR1:9030201  | 1   | 9030201  | 900    | 2           | 2.98E-08 | 2.3              | 2     | 0.2222         |                                                             |                             |
| DMR1:9169101  | 1   | 9169101  | 1200   | 1           | 9.83E-08 | 0.491            | 8     | 0.6667         |                                                             |                             |
| DMR1:11916701 | 1   | 11916701 | 3900   | 1           | 2.72E-08 | 0.619            | 55    | 1.4103         | pRNA                                                        |                             |
| DMR1:11935001 | 1   | 11935001 | 1100   | 1           | 8.76E-08 | 0.631            | 21    | 1.9091         |                                                             |                             |
| DMR1:11963101 | 1   | 11963101 | 4900   | 3           | 1.92E-08 | 0.639            | 564   | 11.5102        | pRNA;AABR07000398.1;5_8S_rRNA;AABR07000402.1;AABR07000404.1 |                             |
| DMR1:15471001 | 1   | 15471001 | 500    | 1           | 5.47E-07 | 0.416            | 1     | 0.2            | Map3k5                                                      | Signaling                   |
| DMR1:16370701 | 1   | 16370701 | 500    | 1           | 6.23E-08 | 0.323            | 10    | 2              |                                                             |                             |
| DMR1:16748201 | 1   | 16748201 | 400    | 2           | 1.96E-09 | 0.533            | 0     | 0              |                                                             |                             |
| DMR1:17802601 | 1   | 17802601 | 100    | 1           | 3.64E-07 | 0.186            | 0     | 0              | Ptprk                                                       | Signaling                   |
| DMR1:18084901 | 1   | 18084901 | 1000   | 2           | 9.82E-09 | 0.558            | 7     | 0.7            | AABR07000574.1                                              |                             |
| DMR1:19202501 | 1   | 19202501 | 300    | 1           | 1.63E-08 | 0.329            | 1     | 0.3333         |                                                             |                             |
| DMR1:21732401 | 1   | 21732401 | 400    | 1           | 3.87E-11 | 0.241            | 1     | 0.25           |                                                             |                             |
| DMR1:21755001 | 1   | 21755001 | 1300   | 4           | 1.42E-09 | 0.648            | 9     | 0.6923         | Enpp1                                                       | Signaling                   |
| DMR1:22545101 | 1   | 22545101 | 1100   | 1           | 3.80E-07 | 0.57             | 11    | 1              | Taar6;Taar5                                                 | Receptor                    |
| DMR1:22736501 | 1   | 22736501 | 300    | 1           | 8.68E-16 | 0.251            | 0     | 0              | Slc18b1                                                     |                             |
| DMR1:23129101 | 1   | 23129101 | 400    | 2           | 3.37E-10 | 0.486            | 0     | 0              |                                                             |                             |
| DMR1:23248901 | 1   | 23248901 | 500    | 1           | 9.90E-10 | 0.579            | 2     | 0.4            |                                                             |                             |
| DMR1:26844401 | 1   | 26844401 | 1500   | 1           | 5.26E-11 | 0.625            | 18    | 1.2            |                                                             |                             |
| DMR1:30195301 | 1   | 30195301 | 300    | 1           | 7.51E-07 | 0.247            | 5     | 1.6667         | AABR07000968.2                                              |                             |
| DMR1:32011001 | 1   | 32011001 | 400    | 1           | 5.40E-08 | 0.403            | 0     | 0              | Trip13                                                      | Unknown                     |
| DMR1:32067401 | 1   | 32067401 | 400    | 1           | 8.29E-07 | 0.342            | 11    | 2.75           | Nkd2                                                        |                             |
| DMR1:32168101 | 1   | 32168101 | 300    | 1           | 1.93E-08 | 0.43             | 8     | 2.6667         |                                                             |                             |
| DMR1:34883301 | 1   | 34883301 | 600    | 1           | 8.68E-07 | 0.558            | 5     | 0.8333         |                                                             |                             |
| DMR1:37392901 | 1   | 37392901 | 300    | 2           | 4.35E-07 | 3.991            | 3     | 1              |                                                             |                             |
| DMR1:39004001 | 1   | 39004001 | 3300   | 1           | 9.75E-07 | 3.764            | 60    | 1.8182         | AABR07001233.1                                              |                             |
| DMR1:39467501 | 1   | 39467501 | 3400   | 1           | 3.83E-07 | 0.648            | 142   | 4.1765         |                                                             |                             |
| DMR1:40429501 | 1   | 40429501 | 300    | 1           | 8.67E-09 | 0.416            | 0     | 0              | Plekhg1                                                     | Signaling                   |
| DMR1:44888301 | 1   | 44888301 | 700    | 4           | 9.40E-17 | 0.534            | 1     | 0.1429         |                                                             |                             |
| DMR1:45091701 | 1   | 45091701 | 400    | 1           | 6.50E-07 | 0.488            | 1     | 0.25           |                                                             |                             |
| DMR1:52454001 | 1   | 52454001 | 1700   | 1           | 3.88E-07 | 2.405            | 33    | 1.9412         | Pde10a                                                      | Signaling                   |
| DMR1:52714201 | 1   | 52714201 | 800    | 1           | 3.94E-11 | 0.64             | 10    | 1.25           |                                                             |                             |
| DMR1:53046001 | 1   | 53046001 | 600    | 1           | 2.92E-07 | 0.467            | 4     | 0.6667         | Mpc1                                                        |                             |
| DMR1:53344501 | 1   | 53344501 | 600    | 3           | 2.31E-17 | 0.498            | 1     | 0.1667         |                                                             |                             |
| DMR1:53670601 | 1   | 53670601 | 300    | 1           | 4.40E-08 | 0.627            | 1     | 0.3333         |                                                             |                             |
| DMR1:54041301 | 1   | 54041301 | 100    | 1           | 4.62E-07 | 4.913            | 0     | 0              | RGD1560718                                                  | Unknown                     |
| DMR1:54078501 | 1   | 54078501 | 1200   | 1           | 6.27E-07 | 0.199            | 13    | 1.0833         |                                                             |                             |
| DMR1:54088801 | 1   | 54088801 | 500    | 1           | 3.43E-07 | 0.401            | 3     | 0.6            |                                                             |                             |
| DMR1:54180101 | 1   | 54180101 | 900    | 1           | 4.91E-07 | 0.502            | 17    | 1.8889         |                                                             |                             |
| DMR1:54244401 | 1   | 54244401 | 800    | 4           | 1.56E-13 | 0.628            | 11    | 1.375          | AABR07001610.1                                              |                             |
| DMR1:54392201 | 1   | 54392201 | 1700   | 1           | 3.23E-07 | 0.365            | 29    | 1.7059         |                                                             |                             |
| DMR1:54417201 | 1   | 54417201 | 4400   | 1           | 8.35E-08 | 0.52             | 71    | 1.6136         |                                                             |                             |
| DMR1:54824701 | 1   | 54824701 | 1500   | 1           | 9.40E-07 | 0.62             | 18    | 1.2            |                                                             |                             |
| DMR1:56038001 | 1   | 56038001 | 1300   | 2           | 7.83E-09 | 0.648            | 13    | 1              |                                                             |                             |
| DMR1:57083201 | 1   | 57083201 | 1500   | 2           | 1.42E-09 | 0.585            | 11    | 0.7333         |                                                             |                             |
| DMR1:57456101 | 1   | 57456101 | 900    | 1           | 9.46E-07 | 0.592            | 0     | 0              |                                                             |                             |
| DMR1:63743701 | 1   | 63743701 | 400    | 1           | 5.44E-07 | 7.977            | 1     | 0.25           | Nilr1                                                       |                             |
| DMR1:64430001 | 1   | 64430001 | 200    | 1           | 5.19E-07 | 0.484            | 2     | 1              | Prkcg;Myadm                                                 | Binding Protein;Development |

|                |   |           |      |   |          |       |     |        |                      |                            |
|----------------|---|-----------|------|---|----------|-------|-----|--------|----------------------|----------------------------|
| DMR1:65946601  | 1 | 65946601  | 200  | 1 | 5.52E-07 | 0.362 | 0   | 0      | Vom2r34;Vom2r33      |                            |
| DMR1:66080801  | 1 | 66080801  | 800  | 1 | 2.53E-08 | 0.505 | 10  | 1.25   | Vom2r34              |                            |
| DMR1:70135901  | 1 | 70135901  | 400  | 1 | 5.00E-07 | 0.616 | 0   | 0      | Mir3099              |                            |
| DMR1:77267901  | 1 | 77267901  | 1000 | 1 | 8.53E-07 | 0.444 | 4   | 0.4    |                      |                            |
| DMR1:91332701  | 1 | 91332701  | 400  | 1 | 5.12E-08 | 0.472 | 2   | 0.5    |                      |                            |
| DMR1:91403001  | 1 | 91403001  | 2100 | 2 | 1.36E-08 | 0.579 | 30  | 1.4286 |                      |                            |
| DMR1:92255001  | 1 | 92255001  | 1600 | 1 | 2.21E-07 | 3.854 | 19  | 1.1875 |                      |                            |
| DMR1:92860501  | 1 | 92860501  | 300  | 2 | 3.58E-09 | 0.494 | 3   | 1      |                      |                            |
| DMR1:92984301  | 1 | 92984301  | 300  | 1 | 3.95E-07 | 0.592 | 8   | 2.6667 |                      |                            |
| DMR1:94508501  | 1 | 94508501  | 1600 | 2 | 1.74E-09 | 0.43  | 20  | 1.25   |                      |                            |
| DMR1:94645701  | 1 | 94645701  | 200  | 1 | 1.70E-07 | 0.632 | 0   | 0      |                      |                            |
| DMR1:97067901  | 1 | 97067901  | 500  | 1 | 8.54E-07 | 0.45  | 4   | 0.8    | AABR07003167.1       |                            |
| DMR1:97414301  | 1 | 97414301  | 800  | 1 | 5.49E-08 | 0.465 | 7   | 0.875  |                      |                            |
| DMR1:98561601  | 1 | 98561601  | 600  | 1 | 5.72E-07 | 0.413 | 0   | 0      | Siglec5              | Immune                     |
| DMR1:101743401 | 1 | 101743401 | 2000 | 1 | 1.30E-07 | 0.477 | 14  | 0.7    | Sult2b1              | Metabolism                 |
| DMR1:105083701 | 1 | 105083701 | 300  | 1 | 8.60E-07 | 0.478 | 1   | 0.3333 |                      |                            |
| DMR1:105461001 | 1 | 105461001 | 1200 | 2 | 1.02E-07 | 0.516 | 19  | 1.5833 | Nell1                | Development                |
| DMR1:124484201 | 1 | 124484201 | 1000 | 1 | 4.34E-07 | 0.533 | 12  | 1.2    | Hmgn5b;U1            |                            |
| DMR1:127163501 | 1 | 127163501 | 200  | 1 | 9.54E-07 | 3.586 | 0   | 0      | Lrrk1                | Unknown                    |
| DMR1:127460801 | 1 | 127460801 | 500  | 1 | 3.66E-07 | 0.562 | 1   | 0.2    |                      |                            |
| DMR1:128908001 | 1 | 128908001 | 300  | 1 | 7.61E-07 | 4.853 | 3   | 1      |                      |                            |
| DMR1:131257101 | 1 | 131257101 | 800  | 1 | 3.11E-07 | 0.587 | 4   | 0.5    |                      |                            |
| DMR1:133649201 | 1 | 133649201 | 400  | 1 | 2.19E-07 | 0.333 | 1   | 0.25   |                      |                            |
| DMR1:135570101 | 1 | 135570101 | 300  | 1 | 1.68E-07 | 0.52  | 0   | 0      |                      |                            |
| DMR1:136944501 | 1 | 136944501 | 300  | 1 | 6.14E-08 | 0.247 | 1   | 0.3333 |                      |                            |
| DMR1:139098401 | 1 | 139098401 | 300  | 1 | 3.13E-07 | 0.361 | 1   | 0.3333 |                      |                            |
| DMR1:141296301 | 1 | 141296301 | 400  | 3 | 9.80E-14 | 0.521 | 0   | 0      |                      |                            |
| DMR1:142293701 | 1 | 142293701 | 300  | 1 | 1.04E-07 | 0.65  | 0   | 0      | Blm                  | Transcription              |
| DMR1:142899001 | 1 | 142899001 | 700  | 1 | 2.49E-07 | 0.486 | 3   | 0.4286 | Alpk3;AABR07004437.1 | Cytoskeleton               |
| DMR1:143826901 | 1 | 143826901 | 1600 | 1 | 3.63E-08 | 0.325 | 17  | 1.0625 | Bnc1                 | Development                |
| DMR1:145931901 | 1 | 145931901 | 300  | 2 | 2.66E-08 | 0.533 | 1   | 0.3333 | Cfap161              |                            |
| DMR1:147047001 | 1 | 147047001 | 200  | 1 | 9.75E-07 | 0.294 | 3   | 1.5    | Xlr3a                |                            |
| DMR1:148445201 | 1 | 148445201 | 2800 | 1 | 1.69E-07 | 0.357 | 128 | 4.5714 | Vbp1                 | Protein Binding            |
| DMR1:148461401 | 1 | 148461401 | 2800 | 2 | 3.07E-09 | 0.539 | 71  | 2.5357 |                      |                            |
| DMR1:148469601 | 1 | 148469601 | 1000 | 2 | 2.73E-07 | 0.626 | 20  | 2      |                      |                            |
| DMR1:148620501 | 1 | 148620501 | 1200 | 1 | 6.53E-07 | 0.575 | 28  | 2.3333 |                      |                            |
| DMR1:148622801 | 1 | 148622801 | 1900 | 1 | 1.76E-07 | 0.62  | 31  | 1.6316 |                      |                            |
| DMR1:148626401 | 1 | 148626401 | 1100 | 1 | 2.01E-08 | 0.617 | 16  | 1.4545 |                      |                            |
| DMR1:148632701 | 1 | 148632701 | 2200 | 8 | 7.70E-12 | 0.626 | 29  | 1.3182 |                      |                            |
| DMR1:148635901 | 1 | 148635901 | 1900 | 1 | 9.51E-07 | 0.621 | 44  | 2.3158 |                      |                            |
| DMR1:148650601 | 1 | 148650601 | 3200 | 3 | 1.14E-07 | 0.628 | 88  | 2.75   |                      |                            |
| DMR1:153395701 | 1 | 153395701 | 400  | 1 | 7.75E-07 | 0.488 | 2   | 0.5    |                      |                            |
| DMR1:160733801 | 1 | 160733801 | 1200 | 1 | 7.12E-07 | 2.592 | 14  | 1.1667 | U6                   |                            |
| DMR1:164715401 | 1 | 164715401 | 200  | 1 | 5.44E-07 | 0.163 | 2   | 1      | Olr36;Olr37          |                            |
| DMR1:166547101 | 1 | 166547101 | 700  | 3 | 5.51E-09 | 0.456 | 2   | 0.2857 | Pde2a                | Signaling                  |
| DMR1:167953301 | 1 | 167953301 | 800  | 1 | 2.77E-12 | 0.608 | 0   | 0      | Olr56;AC096030.2     |                            |
| DMR1:170545801 | 1 | 170545801 | 900  | 1 | 3.38E-07 | 0.512 | 0   | 0      | Dnhd1                |                            |
| DMR1:178864701 | 1 | 178864701 | 300  | 1 | 8.22E-07 | 0.472 | 1   | 0.3333 | Spon1                | Growth Factors & Cytokines |
| DMR1:179353701 | 1 | 179353701 | 300  | 1 | 4.60E-07 | 4.989 | 2   | 0.6667 |                      |                            |
| DMR1:179687901 | 1 | 179687901 | 3700 | 4 | 1.80E-08 | 1.929 | 43  | 1.1622 |                      |                            |
| DMR1:179693501 | 1 | 179693501 | 2200 | 2 | 3.12E-07 | 4.289 | 12  | 0.5455 |                      |                            |
| DMR1:179846001 | 1 | 179846001 | 200  | 1 | 5.76E-08 | 9.143 | 0   | 0      |                      |                            |
| DMR1:179887701 | 1 | 179887701 | 1300 | 1 | 8.12E-07 | 3.022 | 6   | 0.4615 |                      |                            |
| DMR1:180242001 | 1 | 180242001 | 2300 | 1 | 1.02E-12 | 4.019 | 36  | 1.5652 |                      |                            |
| DMR1:181851201 | 1 | 181851201 | 3400 | 1 | 1.87E-08 | 4.13  | 54  | 1.5882 |                      |                            |
| DMR1:182797001 | 1 | 182797001 | 2700 | 1 | 4.18E-08 | 0.573 | 68  | 2.5185 |                      |                            |
| DMR1:185199001 | 1 | 185199001 | 400  | 1 | 5.86E-07 | 0.467 | 0   | 0      |                      |                            |
| DMR1:185552501 | 1 | 185552501 | 500  | 3 | 3.13E-11 | 0.618 | 3   | 0.6    | RGD1311703           |                            |

|                |   |           |      |   |          |        |     |        |                               |                               |
|----------------|---|-----------|------|---|----------|--------|-----|--------|-------------------------------|-------------------------------|
| DMR1:188463201 | 1 | 188463201 | 100  | 1 | 3.37E-07 | 13.102 | 1   | 1      | LOC361635                     | Unknown                       |
| DMR1:195694701 | 1 | 195694701 | 400  | 1 | 4.41E-07 | 0.697  | 2   | 0.5    |                               |                               |
| DMR1:196430001 | 1 | 196430001 | 500  | 2 | 4.67E-09 | 0.394  | 4   | 0.8    |                               |                               |
| DMR1:197336001 | 1 | 197336001 | 500  | 1 | 3.84E-07 | 0.488  | 2   | 0.4    |                               |                               |
| DMR1:198606501 | 1 | 198606501 | 400  | 1 | 7.59E-09 | 0.552  | 0   | 0      |                               |                               |
| DMR1:202370501 | 1 | 202370501 | 200  | 1 | 1.80E-07 | 0.302  | 0   | 0      |                               |                               |
| DMR1:203068501 | 1 | 203068501 | 700  | 1 | 3.93E-07 | 0.502  | 2   | 0.2857 |                               |                               |
| DMR1:204045201 | 1 | 204045201 | 300  | 1 | 1.93E-07 | 0.33   | 0   | 0      | Cpxm2                         | Proteolysis                   |
| DMR1:205537801 | 1 | 205537801 | 300  | 1 | 3.34E-07 | 0.571  | 4   | 1.3333 |                               |                               |
| DMR1:210195801 | 1 | 210195801 | 300  | 1 | 5.35E-07 | 0.622  | 0   | 0      |                               |                               |
| DMR1:211667001 | 1 | 211667001 | 300  | 1 | 1.63E-07 | 0.307  | 1   | 0.3333 |                               |                               |
| DMR1:214610701 | 1 | 214610701 | 5500 | 1 | 5.24E-07 | 0.698  | 133 | 2.4182 | Ap2a2;Muc6                    | Receptor;Extracellular Matrix |
| DMR1:215360501 | 1 | 215360501 | 400  | 1 | 5.15E-09 | 0.36   | 1   | 0.25   | Krtap5-2;Gm4559               |                               |
| DMR1:215466201 | 1 | 215466201 | 1400 | 1 | 7.67E-07 | 0.559  | 12  | 0.8571 | LOC685544                     |                               |
| DMR1:215660701 | 1 | 215660701 | 300  | 1 | 7.33E-08 | 0.282  | 7   | 2.3333 | Lsp1;AC132720.1;Tnnt3         | Cytoskeleton                  |
| DMR1:216242401 | 1 | 216242401 | 400  | 1 | 1.24E-08 | 0.424  | 1   | 0.25   | Cd81                          | Signaling                     |
| DMR1:217215501 | 1 | 217215501 | 300  | 1 | 3.82E-09 | 0.341  | 3   | 1      | Shank2                        | Protein Binding               |
| DMR1:218338701 | 1 | 218338701 | 400  | 1 | 3.55E-08 | 0.456  | 4   | 1      |                               |                               |
| DMR1:218883301 | 1 | 218883301 | 400  | 1 | 6.06E-07 | 0.197  | 2   | 0.5    | Lrp5                          | Receptor                      |
| DMR1:219309601 | 1 | 219309601 | 1100 | 1 | 1.07E-07 | 0.385  | 18  | 1.6364 | RGD1307603                    |                               |
| DMR1:221469301 | 1 | 221469301 | 600  | 1 | 4.88E-09 | 0.544  | 2   | 0.3333 | LOC100910252;Naalad1          | Protease                      |
| DMR1:221778701 | 1 | 221778701 | 800  | 1 | 7.00E-08 | 0.426  | 0   | 0      | Pygm;Rasgrp2                  | Signaling                     |
| DMR1:222324301 | 1 | 222324301 | 400  | 1 | 6.97E-07 | 0.47   | 1   | 0.25   | Macrocl1                      |                               |
| DMR1:225219001 | 1 | 225219001 | 400  | 1 | 9.60E-08 | 0.591  | 0   | 0      | Ahnak                         | Cytoskeleton                  |
| DMR1:226173301 | 1 | 226173301 | 300  | 1 | 6.03E-07 | 0.541  | 0   | 0      |                               |                               |
| DMR1:226415301 | 1 | 226415301 | 200  | 1 | 6.99E-07 | 0.503  | 0   | 0      |                               |                               |
| DMR1:238946001 | 1 | 238946001 | 400  | 1 | 4.91E-08 | 0.337  | 1   | 0.25   |                               |                               |
| DMR1:244449301 | 1 | 244449301 | 200  | 2 | 8.72E-11 | 0.55   | 1   | 0.5    | AABR07006654.1;AABR07006654.2 |                               |
| DMR1:247657501 | 1 | 247657501 | 1600 | 1 | 1.37E-07 | 0.564  | 24  | 1.5    |                               |                               |
| DMR1:252934301 | 1 | 252934301 | 500  | 1 | 2.85E-07 | 8.494  | 3   | 0.6    | Ifit1                         | Immune                        |
| DMR1:253745301 | 1 | 253745301 | 400  | 1 | 6.32E-09 | 0.548  | 1   | 0.25   |                               |                               |
| DMR1:254626801 | 1 | 254626801 | 200  | 1 | 1.96E-07 | 0.294  | 2   | 1      | Htr7                          | Receptor                      |
| DMR1:254797001 | 1 | 254797001 | 600  | 3 | 4.99E-11 | 0.534  | 0   | 0      |                               |                               |
| DMR1:254996401 | 1 | 254996401 | 1300 | 2 | 1.63E-07 | 0.266  | 24  | 1.8462 | Pcgf5                         | Epigenetic                    |
| DMR1:255093801 | 1 | 255093801 | 1000 | 1 | 1.40E-09 | 0.379  | 16  | 1.6    | Pcgf5                         | Epigenetic                    |
| DMR1:256444201 | 1 | 256444201 | 600  | 1 | 1.15E-07 | 0.621  | 2   | 0.3333 | AC096353.1                    |                               |
| DMR1:256729701 | 1 | 256729701 | 200  | 1 | 4.51E-07 | 0.613  | 0   | 0      | Myof                          | Cytoskeleton                  |
| DMR1:256983501 | 1 | 256983501 | 400  | 1 | 3.36E-08 | 0.273  | 3   | 0.75   | Lgi1                          | Receptor                      |
| DMR1:260358101 | 1 | 260358101 | 1400 | 1 | 1.26E-08 | 0.462  | 14  | 1      | Tll2                          | Protease                      |
| DMR1:260584201 | 1 | 260584201 | 500  | 1 | 1.33E-07 | 0.455  | 0   | 0      | Pik3ap1                       |                               |
| DMR1:260950301 | 1 | 260950301 | 1500 | 1 | 1.78E-07 | 7.495  | 10  | 0.6667 | Slit1                         | Receptor                      |
| DMR1:261495501 | 1 | 261495501 | 200  | 1 | 4.02E-07 | 0.547  | 2   | 1      | Golga7b                       |                               |
| DMR1:263684301 | 1 | 263684301 | 800  | 1 | 5.25E-07 | 0.548  | 0   | 0      | Dnmbp                         | EST                           |
| DMR1:264556301 | 1 | 264556301 | 1200 | 2 | 1.08E-09 | 0.574  | 12  | 1      | Pax2                          | Transcription                 |
| DMR1:264588201 | 1 | 264588201 | 300  | 2 | 3.10E-11 | 0.6    | 1   | 0.3333 | Pax2                          | Transcription                 |
| DMR1:265803801 | 1 | 265803801 | 400  | 1 | 7.96E-07 | 0.424  | 2   | 0.5    | Ldb1;Pprc1                    | Transcription;Signaling       |
| DMR1:266459101 | 1 | 266459101 | 1000 | 2 | 2.76E-09 | 0.49   | 10  | 1      | Borcs7                        |                               |
| DMR1:267342101 | 1 | 267342101 | 300  | 1 | 3.70E-07 | 0.471  | 6   | 2      |                               |                               |
| DMR1:273065701 | 1 | 273065701 | 400  | 1 | 1.83E-07 | 0.395  | 2   | 0.5    | AABR07006957.1                |                               |
| DMR1:274268101 | 1 | 274268101 | 400  | 1 | 1.21E-07 | 0.605  | 2   | 0.5    | Dusp5                         | Signaling                     |
| DMR1:276052201 | 1 | 276052201 | 400  | 1 | 5.81E-07 | 0.395  | 1   | 0.25   |                               |                               |
| DMR1:278286301 | 1 | 278286301 | 300  | 1 | 6.45E-08 | 0.473  | 1   | 0.3333 |                               |                               |
| DMR1:278457401 | 1 | 278457401 | 900  | 1 | 6.45E-08 | 0.531  | 2   | 0.2222 |                               |                               |
| DMR1:278891501 | 1 | 278891501 | 200  | 1 | 1.83E-07 | 0.503  | 0   | 0      |                               |                               |
| DMR1:279925401 | 1 | 279925401 | 400  | 1 | 2.17E-08 | 0.442  | 13  | 3.25   | Pnliprp2                      | Unknown                       |
| DMR1:280030701 | 1 | 280030701 | 1500 | 1 | 3.79E-08 | 0.336  | 9   | 0.6    |                               |                               |
| DMR1:280046301 | 1 | 280046301 | 900  | 1 | 2.52E-07 | 0.284  | 0   | 0      |                               |                               |

|                |   |           |      |   |          |        |     |        |                |                 |
|----------------|---|-----------|------|---|----------|--------|-----|--------|----------------|-----------------|
| DMR2:185501    | 2 | 185501    | 500  | 1 | 4.47E-07 | 0.599  | 4   | 0.8    |                |                 |
| DMR2:4064001   | 2 | 4064001   | 500  | 1 | 3.02E-07 | 0.557  | 0   | 0      | Mctp1          | Unknown         |
| DMR2:4424201   | 2 | 4424201   | 200  | 1 | 1.71E-08 | 14.612 | 0   | 0      | RGD1560883     | Unknown         |
| DMR2:4497101   | 2 | 4497101   | 2600 | 3 | 5.03E-17 | 0.509  | 3   | 0.1154 | RGD1560883     | Unknown         |
| DMR2:7298701   | 2 | 7298701   | 500  | 1 | 4.52E-07 | 0.618  | 5   | 1      |                |                 |
| DMR2:8942201   | 2 | 8942201   | 1200 | 2 | 1.70E-07 | 0.406  | 3   | 0.25   | Adgrv1         |                 |
| DMR2:9253901   | 2 | 9253901   | 500  | 1 | 4.41E-07 | 0.56   | 4   | 0.8    | Adgrv1         |                 |
| DMR2:9833201   | 2 | 9833201   | 300  | 1 | 7.58E-10 | 0.347  | 0   | 0      |                |                 |
| DMR2:17316201  | 2 | 17316201  | 600  | 1 | 8.48E-07 | 0.568  | 3   | 0.5    |                |                 |
| DMR2:20274701  | 2 | 20274701  | 200  | 1 | 3.73E-07 | 0.371  | 4   | 2      |                |                 |
| DMR2:20578801  | 2 | 20578801  | 200  | 2 | 3.17E-08 | 0.396  | 0   | 0      | Ssbp2          | Transcription   |
| DMR2:20788501  | 2 | 20788501  | 600  | 1 | 7.33E-07 | 0.336  | 10  | 1.6667 |                |                 |
| DMR2:21025801  | 2 | 21025801  | 1500 | 1 | 4.34E-07 | 4.522  | 18  | 1.2    |                |                 |
| DMR2:24756901  | 2 | 24756901  | 400  | 2 | 1.01E-12 | 0.593  | 1   | 0.25   | Pde8b          | Signaling       |
| DMR2:28673701  | 2 | 28673701  | 300  | 2 | 1.88E-07 | 0.49   | 0   | 0      |                |                 |
| DMR2:30978401  | 2 | 30978401  | 2300 | 1 | 1.90E-07 | 0.658  | 14  | 0.6087 |                |                 |
| DMR2:42015701  | 2 | 42015701  | 1300 | 2 | 4.53E-08 | 0.302  | 22  | 1.6923 |                |                 |
| DMR2:42396101  | 2 | 42396101  | 100  | 1 | 2.36E-07 | 0.195  | 0   | 0      |                |                 |
| DMR2:44778301  | 2 | 44778301  | 300  | 1 | 4.61E-07 | 0.534  | 0   | 0      | Skiv2l2;Dhx29  | Transcription   |
| DMR2:47485401  | 2 | 47485401  | 1100 | 1 | 9.47E-07 | 0.43   | 8   | 0.7273 |                |                 |
| DMR2:48424601  | 2 | 48424601  | 700  | 1 | 6.47E-07 | 0.341  | 6   | 0.8571 |                |                 |
| DMR2:51955201  | 2 | 51955201  | 300  | 2 | 1.12E-08 | 0.509  | 1   | 0.3333 |                |                 |
| DMR2:52275101  | 2 | 52275101  | 700  | 1 | 8.54E-07 | 0.642  | 0   | 0      | Nnt            | Metabolism      |
| DMR2:52340801  | 2 | 52340801  | 200  | 1 | 3.16E-08 | 0.28   | 2   | 1      | RGD1306227     |                 |
| DMR2:55009001  | 2 | 55009001  | 400  | 1 | 8.43E-08 | 0.501  | 3   | 0.75   |                |                 |
| DMR2:67896501  | 2 | 67896501  | 200  | 1 | 2.59E-07 | 0.223  | 1   | 0.5    |                |                 |
| DMR2:82503101  | 2 | 82503101  | 300  | 1 | 6.50E-07 | 0.49   | 2   | 0.6667 | AABR07008991.1 |                 |
| DMR2:83309601  | 2 | 83309601  | 300  | 1 | 1.02E-07 | 0.639  | 1   | 0.3333 |                |                 |
| DMR2:83312901  | 2 | 83312901  | 300  | 1 | 3.95E-07 | 0.302  | 1   | 0.3333 |                |                 |
| DMR2:93735001  | 2 | 93735001  | 300  | 1 | 8.12E-10 | 0.585  | 2   | 0.6667 | Fabp12         | Binding Protein |
| DMR2:102984201 | 2 | 102984201 | 400  | 2 | 1.07E-08 | 0.574  | 9   | 2.25   |                |                 |
| DMR2:106884801 | 2 | 106884801 | 300  | 1 | 9.72E-07 | 0.359  | 0   | 0      |                |                 |
| DMR2:110307101 | 2 | 110307101 | 400  | 1 | 4.61E-10 | 0.562  | 4   | 1      | LOC499584      |                 |
| DMR2:110836501 | 2 | 110836501 | 200  | 1 | 9.09E-07 | 0.482  | 0   | 0      |                |                 |
| DMR2:111807901 | 2 | 111807901 | 400  | 1 | 8.28E-09 | 0.485  | 3   | 0.75   |                |                 |
| DMR2:112504601 | 2 | 112504601 | 500  | 1 | 1.05E-07 | 0.552  | 0   | 0      | Spata16        |                 |
| DMR2:113199701 | 2 | 113199701 | 400  | 1 | 1.19E-10 | 0.468  | 0   | 0      | Fndc3b         | Cytoskeleton    |
| DMR2:114528601 | 2 | 114528601 | 1500 | 1 | 2.96E-07 | 0.577  | 20  | 1.3333 |                |                 |
| DMR2:114666301 | 2 | 114666301 | 500  | 1 | 4.19E-07 | 13.442 | 10  | 2      |                |                 |
| DMR2:114752101 | 2 | 114752101 | 500  | 1 | 7.33E-07 | 6.209  | 5   | 1      |                |                 |
| DMR2:115810301 | 2 | 115810301 | 100  | 1 | 3.31E-11 | 0      | 0   | 0      | U1             |                 |
| DMR2:122945101 | 2 | 122945101 | 400  | 1 | 6.88E-07 | 0.599  | 0   | 0      | Qrfpr          | Receptor        |
| DMR2:141307501 | 2 | 141307501 | 700  | 2 | 6.92E-07 | 0.647  | 1   | 0.1429 |                |                 |
| DMR2:141538601 | 2 | 141538601 | 600  | 1 | 9.46E-07 | 0.6    | 4   | 0.6667 |                |                 |
| DMR2:143598501 | 2 | 143598501 | 300  | 1 | 1.54E-07 | 0.551  | 1   | 0.3333 | Trpc4          | Development     |
| DMR2:149577301 | 2 | 149577301 | 600  | 1 | 4.37E-07 | 0.623  | 0   | 0      |                |                 |
| DMR2:153250801 | 2 | 153250801 | 500  | 1 | 7.29E-07 | 0.254  | 5   | 1      |                |                 |
| DMR2:156214301 | 2 | 156214301 | 900  | 1 | 1.95E-07 | 2.412  | 2   | 0.2222 |                |                 |
| DMR2:158692301 | 2 | 158692301 | 400  | 1 | 1.85E-07 | 0.574  | 8   | 2      |                |                 |
| DMR2:159112701 | 2 | 159112701 | 5600 | 1 | 1.19E-08 | 6.043  | 118 | 2.1071 |                |                 |
| DMR2:160726901 | 2 | 160726901 | 500  | 2 | 2.35E-09 | 2.351  | 4   | 0.8    |                |                 |
| DMR2:160729501 | 2 | 160729501 | 700  | 5 | 9.86E-10 | 2.626  | 6   | 0.8571 |                |                 |
| DMR2:161037401 | 2 | 161037401 | 1900 | 2 | 3.97E-07 | 2.227  | 27  | 1.4211 |                |                 |
| DMR2:168814701 | 2 | 168814701 | 300  | 2 | 1.17E-09 | 0.539  | 0   | 0      |                |                 |
| DMR2:174066201 | 2 | 174066201 | 1500 | 1 | 3.35E-07 | 3.871  | 11  | 0.7333 | Serpini1       | Proteolysis     |
| DMR2:175252001 | 2 | 175252001 | 400  | 1 | 6.52E-07 | 3.251  | 4   | 1      |                |                 |
| DMR2:178451001 | 2 | 178451001 | 300  | 1 | 4.35E-10 | 0.347  | 0   | 0      | Rxfp1          | Receptor        |
| DMR2:180317701 | 2 | 180317701 | 1300 | 2 | 2.05E-08 | 0.498  | 5   | 0.3846 |                |                 |
| DMR2:183585401 | 2 | 183585401 | 800  | 1 | 7.68E-07 | 0.481  | 1   | 0.125  | Arfp1          | Signaling       |



|                |   |           |      |   |          |       |    |        |                                   |                          |
|----------------|---|-----------|------|---|----------|-------|----|--------|-----------------------------------|--------------------------|
| DMR2:188766201 | 2 | 188766201 | 200  | 1 | 1.14E-07 | 0.305 | 1  | 0.5    | Shc1;Pygo2;AC098750.1;Pbxip1      | Signaling;Epigenetic     |
| DMR2:193572101 | 2 | 193572101 | 1200 | 1 | 1.79E-08 | 0.571 | 68 | 5.6667 | AABR07012329.1                    |                          |
| DMR2:194122701 | 2 | 194122701 | 1800 | 2 | 8.89E-09 | 0.576 | 51 | 2.8333 |                                   |                          |
| DMR2:198844301 | 2 | 198844301 | 300  | 1 | 3.58E-07 | 0.4   | 5  | 1.6667 | Pias3;Nudt17;Polr3c;SNORA5;Rnf115 | Metabolism;Transcription |
| DMR2:199044701 | 2 | 199044701 | 900  | 5 | 1.69E-22 | 0.563 | 0  | 0      | Gpr89b;Gja8                       | Signaling                |
| DMR2:199069101 | 2 | 199069101 | 300  | 2 | 6.98E-09 | 0.313 | 2  | 0.6667 |                                   |                          |
| DMR2:199096601 | 2 | 199096601 | 400  | 2 | 1.31E-07 | 0.394 | 13 | 3.25   |                                   |                          |
| DMR2:199375201 | 2 | 199375201 | 400  | 1 | 1.12E-07 | 0.452 | 0  | 0      |                                   |                          |
| DMR2:204717801 | 2 | 204717801 | 1500 | 1 | 9.16E-10 | 0.592 | 12 | 0.8    |                                   |                          |
| DMR2:204924601 | 2 | 204924601 | 400  | 1 | 5.08E-07 | 0.625 | 2  | 0.5    | Ngf                               | Signaling                |
| DMR2:205073101 | 2 | 205073101 | 500  | 1 | 1.96E-07 | 0.56  | 1  | 0.2    |                                   |                          |
| DMR2:205322301 | 2 | 205322301 | 100  | 1 | 2.81E-07 | 0.233 | 1  | 1      | Sycp1;SNORA68                     | Cell Cycle               |
| DMR2:206786001 | 2 | 206786001 | 400  | 1 | 9.90E-08 | 0.344 | 7  | 1.75   | AABR07012762.1                    |                          |
| DMR2:208451501 | 2 | 208451501 | 200  | 1 | 4.50E-07 | 0.248 | 2  | 1      | Trmigd3;LOC100911453;Wdr77        | Epigenetic               |
| DMR2:208620701 | 2 | 208620701 | 200  | 1 | 4.55E-07 | 0.22  | 4  | 2      | Pifo                              |                          |
| DMR2:212654501 | 2 | 212654501 | 300  | 1 | 4.22E-08 | 0.421 | 0  | 0      |                                   |                          |
| DMR2:216642901 | 2 | 216642901 | 800  | 1 | 8.18E-09 | 0.546 | 4  | 0.5    |                                   |                          |
| DMR2:219875001 | 2 | 219875001 | 300  | 1 | 4.83E-07 | 0.522 | 0  | 0      |                                   |                          |
| DMR2:226853001 | 2 | 226853001 | 500  | 2 | 9.19E-09 | 0.356 | 0  | 0      |                                   |                          |
| DMR2:236664101 | 2 | 236664101 | 300  | 1 | 3.22E-08 | 0.308 | 3  | 1      | Papss1                            | Metabolism               |
| DMR2:239023001 | 2 | 239023001 | 300  | 1 | 8.28E-09 | 0.507 | 0  | 0      |                                   |                          |
| DMR2:243356701 | 2 | 243356701 | 1000 | 1 | 6.99E-07 | 0.497 | 14 | 1.4    | Mttp                              | Transport                |
| DMR2:244095901 | 2 | 244095901 | 1300 | 1 | 9.70E-09 | 0.55  | 17 | 1.3077 | Tspan5                            | Cytoskeleton             |
| DMR2:244122501 | 2 | 244122501 | 500  | 1 | 5.39E-07 | 0.434 | 1  | 0.2    | Tspan5                            | Cytoskeleton             |
| DMR2:245726601 | 2 | 245726601 | 500  | 1 | 1.99E-07 | 0.462 | 0  | 0      |                                   |                          |
| DMR2:253311201 | 2 | 253311201 | 800  | 1 | 7.46E-10 | 0.581 | 2  | 0.25   |                                   |                          |
| DMR2:254331001 | 2 | 254331001 | 800  | 1 | 2.68E-07 | 0.311 | 7  | 0.875  | Rn60_2_2544.1                     |                          |
| DMR2:254656001 | 2 | 254656001 | 200  | 1 | 2.58E-07 | 0.267 | 4  | 2      |                                   |                          |
| DMR2:261369301 | 2 | 261369301 | 1900 | 1 | 5.71E-07 | 0.295 | 58 | 3.0526 |                                   |                          |
| DMR2:262096401 | 2 | 262096401 | 200  | 1 | 9.02E-07 | 0.429 | 3  | 1.5    |                                   |                          |
| DMR3:2305401   | 3 | 2305401   | 300  | 2 | 1.14E-09 | 0.618 | 1  | 0.3333 | Entpd8;Noxa1                      | Signaling;Metabolism     |
| DMR3:2901201   | 3 | 2901201   | 1100 | 1 | 1.55E-08 | 0.512 | 9  | 0.8182 | Lcn6;Lcn10;Obp2a                  | Binding Protein          |
| DMR3:5579901   | 3 | 5579901   | 300  | 1 | 5.40E-07 | 0.318 | 7  | 2.3333 | Cacfd1;Slc2a6;AC126134.1          | Transport                |
| DMR3:5934901   | 3 | 5934901   | 1300 | 1 | 1.23E-07 | 0.547 | 22 | 1.6923 | Vav2                              | Signaling                |
| DMR3:9995601   | 3 | 9995601   | 500  | 1 | 3.59E-07 | 0.495 | 3  | 0.6    | Fibcd1                            | Cytoskeleton             |
| DMR3:10302701  | 3 | 10302701  | 500  | 1 | 4.14E-07 | 0.622 | 0  | 0      | Rn60_3_0103.2                     |                          |
| DMR3:10505001  | 3 | 10505001  | 300  | 2 | 2.80E-09 | 0.39  | 2  | 0.6667 |                                   |                          |
| DMR3:12654801  | 3 | 12654801  | 1200 | 1 | 4.23E-07 | 0.513 | 15 | 1.25   | Lmx1b                             |                          |
| DMR3:13151001  | 3 | 13151001  | 400  | 1 | 8.37E-07 | 0.412 | 1  | 0.25   |                                   |                          |
| DMR3:14959301  | 3 | 14959301  | 1100 | 1 | 8.69E-08 | 0.155 | 15 | 1.3636 | Dab2ip                            | Signaling                |
| DMR3:18300401  | 3 | 18300401  | 300  | 1 | 1.46E-08 | 0.303 | 3  | 1      |                                   |                          |
| DMR3:23694201  | 3 | 23694201  | 200  | 2 | 1.05E-13 | 0.068 | 2  | 1      |                                   |                          |
| DMR3:24674901  | 3 | 24674901  | 300  | 2 | 1.51E-08 | 0.453 | 2  | 0.6667 |                                   |                          |
| DMR3:26885301  | 3 | 26885301  | 800  | 1 | 5.28E-08 | 0.558 | 5  | 0.625  |                                   |                          |
| DMR3:30175001  | 3 | 30175001  | 200  | 1 | 1.38E-09 | 0.565 | 0  | 0      |                                   |                          |
| DMR3:36093501  | 3 | 36093501  | 300  | 1 | 4.97E-09 | 0.366 | 5  | 1.6667 |                                   |                          |
| DMR3:43814301  | 3 | 43814301  | 2100 | 1 | 9.53E-08 | 4.444 | 15 | 0.7143 |                                   |                          |
| DMR3:45291601  | 3 | 45291601  | 300  | 1 | 9.75E-07 | 0.287 | 3  | 1      | Pkp4                              | Cytoskeleton             |
| DMR3:45446701  | 3 | 45446701  | 400  | 1 | 4.32E-07 | 0.436 | 3  | 0.75   |                                   |                          |
| DMR3:47573401  | 3 | 47573401  | 1200 | 1 | 9.73E-08 | 0.406 | 3  | 0.25   | AABR07052324.1;Psm14              | Protease                 |
| DMR3:48607901  | 3 | 48607901  | 400  | 1 | 7.51E-07 | 0.244 | 2  | 0.5    | Ifih1                             | Transcription            |
| DMR3:50156801  | 3 | 50156801  | 600  | 1 | 3.17E-07 | 0.439 | 2  | 0.3333 |                                   |                          |
| DMR3:50865001  | 3 | 50865001  | 200  | 2 | 2.76E-07 | 0.437 | 1  | 0.5    | AABR07052390.1                    |                          |
| DMR3:52065701  | 3 | 52065701  | 1100 | 1 | 1.04E-07 | 0.621 | 20 | 1.8182 | Csrnp3                            | Unknown                  |
| DMR3:52577101  | 3 | 52577101  | 200  | 1 | 8.53E-08 | 0.521 | 0  | 0      | Scn9a                             | Transport                |
| DMR3:55077801  | 3 | 55077801  | 300  | 1 | 6.70E-09 | 0.568 | 1  | 0.3333 |                                   |                          |

|                |   |           |      |   |          |       |    |        |                          |                                       |
|----------------|---|-----------|------|---|----------|-------|----|--------|--------------------------|---------------------------------------|
| DMR3:55603201  | 3 | 55603201  | 300  | 1 | 9.55E-08 | 0.361 | 1  | 0.3333 |                          |                                       |
| DMR3:58897001  | 3 | 58897001  | 200  | 1 | 2.34E-07 | 0.35  | 8  | 4      | Rapgef4                  | Development                           |
| DMR3:60962401  | 3 | 60962401  | 200  | 1 | 7.87E-07 | 8.291 | 3  | 1.5    |                          |                                       |
| DMR3:73166501  | 3 | 73166501  | 300  | 1 | 2.30E-07 | 0.427 | 0  | 0      | Olr458                   |                                       |
| DMR3:76468901  | 3 | 76468901  | 300  | 1 | 3.28E-07 | 0.297 | 6  | 2      | Olr619                   |                                       |
| DMR3:80303701  | 3 | 80303701  | 400  | 3 | 8.78E-13 | 0.477 | 1  | 0.25   | RGD1309540               | Unknown                               |
| DMR3:80939101  | 3 | 80939101  | 400  | 1 | 3.59E-07 | 2.046 | 3  | 0.75   | Creb3l1                  | Transcription                         |
| DMR3:81016901  | 3 | 81016901  | 400  | 1 | 5.43E-07 | 0.397 | 0  | 0      |                          |                                       |
| DMR3:83948901  | 3 | 83948901  | 400  | 1 | 1.90E-08 | 0.536 | 0  | 0      |                          |                                       |
| DMR3:84315001  | 3 | 84315001  | 500  | 1 | 2.00E-08 | 0.592 | 2  | 0.4    |                          |                                       |
| DMR3:93122801  | 3 | 93122801  | 800  | 1 | 2.28E-07 | 12.87 | 6  | 0.75   |                          |                                       |
| DMR3:95233501  | 3 | 95233501  | 200  | 1 | 1.80E-07 | 0.299 | 0  | 0      | LOC691083                |                                       |
| DMR3:96883601  | 3 | 96883601  | 900  | 1 | 3.53E-07 | 0.442 | 8  | 0.8889 |                          |                                       |
| DMR3:107856801 | 3 | 107856801 | 500  | 1 | 1.58E-07 | 0.458 | 0  | 0      |                          |                                       |
| DMR3:109503701 | 3 | 109503701 | 700  | 1 | 1.40E-07 | 0.467 | 3  | 0.4286 |                          |                                       |
| DMR3:111152601 | 3 | 111152601 | 700  | 1 | 1.50E-08 | 0.595 | 0  | 0      | Dll4;Chac1               | Growth Factors & Cytokines;Metabolism |
| DMR3:113726601 | 3 | 113726601 | 500  | 2 | 2.44E-11 | 0.563 | 0  | 0      |                          |                                       |
| DMR3:116960001 | 3 | 116960001 | 600  | 1 | 7.21E-07 | 0.458 | 30 | 5      | Sema6d                   | Growth Factors & Cytokines            |
| DMR3:118675601 | 3 | 118675601 | 400  | 2 | 9.76E-12 | 0.368 | 8  | 2      | Atp8b4                   | Transport                             |
| DMR3:121118401 | 3 | 121118401 | 300  | 1 | 1.35E-08 | 0.473 | 0  | 0      | LOC499886                | Unknown                               |
| DMR3:121323801 | 3 | 121323801 | 2000 | 1 | 2.92E-08 | 0.411 | 19 | 0.95   | Mertk;SNORA25            | Signaling                             |
| DMR3:122258101 | 3 | 122258101 | 400  | 1 | 1.88E-09 | 0.373 | 0  | 0      |                          |                                       |
| DMR3:123634301 | 3 | 123634301 | 700  | 1 | 6.66E-08 | 0.517 | 8  | 1.1429 | Siglec1;U6               | Extracellular Matrix                  |
| DMR3:124844901 | 3 | 124844901 | 1200 | 2 | 6.88E-09 | 0.41  | 7  | 0.5833 |                          |                                       |
| DMR3:125237201 | 3 | 125237201 | 500  | 1 | 1.99E-07 | 0.396 | 2  | 0.4    | AABR07053771.1           |                                       |
| DMR3:125309901 | 3 | 125309901 | 400  | 2 | 3.23E-07 | 0.499 | 0  | 0      |                          |                                       |
| DMR3:130687701 | 3 | 130687701 | 400  | 2 | 1.41E-09 | 0.499 | 1  | 0.25   |                          |                                       |
| DMR3:138610801 | 3 | 138610801 | 200  | 2 | 1.44E-09 | 0.589 | 0  | 0      | Zfp133                   | Transcription                         |
| DMR3:138886101 | 3 | 138886101 | 300  | 1 | 1.42E-07 | 0.487 | 3  | 1      | Dtd1                     | Transcription                         |
| DMR3:139867001 | 3 | 139867001 | 400  | 1 | 1.94E-09 | 0.256 | 5  | 1.25   |                          |                                       |
| DMR3:147099101 | 3 | 147099101 | 600  | 2 | 1.59E-08 | 0.54  | 0  | 0      | Sdcbp2;Snph              | Transport                             |
| DMR3:149277701 | 3 | 149277701 | 300  | 1 | 2.72E-07 | 0.207 | 5  | 1.6667 | Efcab8                   |                                       |
| DMR3:150169601 | 3 | 150169601 | 300  | 1 | 3.04E-08 | 0.585 | 8  | 2.6667 |                          |                                       |
| DMR3:151812501 | 3 | 151812501 | 300  | 1 | 8.24E-08 | 0.391 | 0  | 0      |                          |                                       |
| DMR3:159097301 | 3 | 159097301 | 500  | 3 | 4.47E-10 | 0.362 | 10 | 2      | LOC103694889             |                                       |
| DMR3:160572301 | 3 | 160572301 | 800  | 2 | 2.50E-08 | 0.593 | 6  | 0.75   | Wfdc5;AABR07054562.2;    |                                       |
| DMR3:160662101 | 3 | 160662101 | 600  | 2 | 4.54E-08 | 0.387 | 13 | 2.1667 | Wfdc12                   | Signaling                             |
| DMR3:160893701 | 3 | 160893701 | 400  | 1 | 8.75E-07 | 0.512 | 0  | 0      | LOC103691965             |                                       |
| DMR3:162241101 | 3 | 162241101 | 1300 | 4 | 3.14E-13 | 0.551 | 1  | 0.0769 | Sdc4                     | Cytoskeleton                          |
| DMR3:166220501 | 3 | 166220501 | 1100 | 1 | 7.29E-07 | 0.529 | 2  | 0.1818 | AABR07054583.1           |                                       |
| DMR3:166481401 | 3 | 166481401 | 500  | 1 | 5.05E-07 | 0.508 | 2  | 0.4    |                          |                                       |
| DMR3:169443601 | 3 | 169443601 | 700  | 1 | 3.33E-07 | 3.016 | 4  | 0.5714 |                          |                                       |
| DMR3:169676001 | 3 | 169676001 | 500  | 1 | 5.25E-07 | 0.478 | 2  | 0.4    |                          |                                       |
| DMR3:170092201 | 3 | 170092201 | 1600 | 1 | 7.82E-07 | 0.394 | 23 | 1.4375 |                          |                                       |
| DMR3:170429801 | 3 | 170429801 | 1700 | 2 | 4.69E-09 | 0.57  | 39 | 2.2941 | Cass4                    | Transcription                         |
| DMR3:171717801 | 3 | 171717801 | 1100 | 1 | 5.57E-07 | 0.385 | 5  | 0.4545 |                          |                                       |
| DMR3:176733501 | 3 | 176733501 | 400  | 1 | 2.29E-07 | 0.313 | 14 | 3.5    | Fndc11;Helz2             | Transcription                         |
| DMR3:177220601 | 3 | 177220601 | 1300 | 1 | 1.52E-08 | 0.348 | 4  | 0.3077 | Oprl1                    | Receptor                              |
| DMR4:798601    | 4 | 798601    | 600  | 4 | 5.16E-10 | 0.442 | 2  | 0.3333 |                          |                                       |
| DMR4:6337301   | 4 | 6337301   | 500  | 2 | 3.23E-08 | 0.683 | 8  | 1.6    | Galnt11;E130116L18Rik;Ga |                                       |
| DMR4:6487901   | 4 | 6487901   | 300  | 1 | 6.46E-07 | 0.325 | 5  | 1.6667 | Intl5                    | Metabolism                            |
| DMR4:16066901  | 4 | 16066901  | 2000 | 1 | 7.08E-07 | 0.493 | 31 | 1.55   | Rn60_4_0065.1            |                                       |
| DMR4:21657401  | 4 | 21657401  | 300  | 2 | 1.63E-09 | 0.321 | 0  | 0      | Cacna2d1                 | Metabolism                            |
| DMR4:25821601  | 4 | 25821601  | 300  | 1 | 5.32E-08 | 0.614 | 0  | 0      | RGD1563349               | EST                                   |
| DMR4:28043101  | 4 | 28043101  | 700  | 2 | 3.85E-09 | 0.478 | 5  | 0.7143 | Cdk14                    | Cell Cycle                            |

|                |   |           |       |    |          |        |     |        |                       |                      |
|----------------|---|-----------|-------|----|----------|--------|-----|--------|-----------------------|----------------------|
| DMR4:28923301  | 4 | 28923301  | 200   | 1  | 5.71E-07 | 0.286  | 4   | 2      |                       |                      |
| DMR4:29086501  | 4 | 29086501  | 500   | 2  | 4.28E-10 | 0.539  | 4   | 0.8    | Bet1                  | Golgi                |
| DMR4:29447201  | 4 | 29447201  | 2000  | 1  | 4.57E-07 | 0.481  | 13  | 0.65   |                       |                      |
| DMR4:29649001  | 4 | 29649001  | 1500  | 7  | 8.00E-11 | 0.683  | 8   | 0.5333 | Casd1                 |                      |
| DMR4:29653201  | 4 | 29653201  | 2300  | 7  | 2.85E-10 | 0.689  | 11  | 0.4783 | Casd1                 |                      |
| DMR4:31715801  | 4 | 31715801  | 1700  | 1  | 1.81E-07 | 0.606  | 20  | 1.1765 | Slc25a13              | Metabolism           |
| DMR4:39090801  | 4 | 39090801  | 300   | 2  | 3.95E-07 | 0.532  | 2   | 0.6667 | Thsd7a;5S_rRNA        | Extracellular Matrix |
| DMR4:41101901  | 4 | 41101901  | 700   | 2  | 1.12E-10 | 0.584  | 4   | 0.5714 |                       |                      |
| DMR4:41492101  | 4 | 41492101  | 500   | 1  | 6.89E-07 | 0.639  | 1   | 0.2    | Foxp2                 | Transcription        |
| DMR4:41669101  | 4 | 41669101  | 600   | 1  | 7.71E-08 | 0.535  | 1   | 0.1667 | Foxp2                 | Transcription        |
| DMR4:42693101  | 4 | 42693101  | 400   | 1  | 6.99E-07 | 0.377  | 13  | 3.25   | Cftr                  | Transport            |
| DMR4:45007101  | 4 | 45007101  | 1300  | 1  | 1.78E-07 | 0.381  | 6   | 0.4615 | ST7                   | Unknown              |
| DMR4:54827001  | 4 | 54827001  | 1900  | 1  | 4.36E-07 | 5.55   | 38  | 2      | Grm8                  | Receptor             |
| DMR4:54923501  | 4 | 54923501  | 500   | 2  | 5.94E-12 | 0.537  | 0   | 0      | Grm8                  | Receptor             |
| DMR4:55760101  | 4 | 55760101  | 1600  | 1  | 1.87E-07 | 0.379  | 8   | 0.5    |                       |                      |
| DMR4:56664901  | 4 | 56664901  | 200   | 1  | 1.13E-11 | 0.607  | 0   | 0      | Opn1sw;Ccdc136        | Receptor             |
| DMR4:57908601  | 4 | 57908601  | 1900  | 1  | 5.38E-07 | 0.44   | 38  | 2      | Cpa4                  | Proteolysis          |
| DMR4:59070001  | 4 | 59070001  | 500   | 1  | 8.75E-07 | 0.559  | 1   | 0.2    |                       |                      |
| DMR4:63775201  | 4 | 63775201  | 300   | 1  | 6.65E-07 | 0.374  | 1   | 0.3333 |                       |                      |
| DMR4:70613401  | 4 | 70613401  | 400   | 1  | 2.62E-07 | 0.614  | 1   | 0.25   | AC142181.1;Prss3      | Proteolysis          |
| DMR4:76022201  | 4 | 76022201  | 400   | 1  | 7.11E-08 | 0.428  | 3   | 0.75   | Cntnap2               | Receptor             |
| DMR4:77399901  | 4 | 77399901  | 12400 | 14 | 1.01E-11 | 0.596  | 376 | 3.0323 | AABR07060519.1        |                      |
| DMR4:77413601  | 4 | 77413601  | 2900  | 1  | 1.17E-07 | 0.689  | 52  | 1.7931 | AABR07060519.1        |                      |
| DMR4:77447001  | 4 | 77447001  | 6300  | 2  | 6.09E-09 | 0.644  | 212 | 3.3651 | AABR07060519.1;Y_rRNA |                      |
| DMR4:78304801  | 4 | 78304801  | 1000  | 2  | 3.51E-09 | 0.637  | 5   | 0.5    | Gimap8;Gimap9         | Unknown              |
| DMR4:78375301  | 4 | 78375301  | 700   | 2  | 1.35E-07 | 0.603  | 6   | 0.8571 | Gimap1;Gimap5         | Unknown              |
| DMR4:83959001  | 4 | 83959001  | 500   | 1  | 3.07E-08 | 3.186  | 1   | 0.2    | Tril                  | Receptor             |
| DMR4:84523901  | 4 | 84523901  | 400   | 1  | 3.34E-07 | 0.552  | 0   | 0      |                       |                      |
| DMR4:95545901  | 4 | 95545901  | 500   | 2  | 2.32E-07 | 0.561  | 1   | 0.2    |                       |                      |
| DMR4:98899001  | 4 | 98899001  | 400   | 1  | 4.64E-07 | 0.489  | 2   | 0.5    |                       |                      |
| DMR4:99046901  | 4 | 99046901  | 400   | 1  | 4.09E-07 | 0.537  | 0   | 0      |                       |                      |
| DMR4:99812501  | 4 | 99812501  | 400   | 1  | 2.62E-07 | 0.414  | 0   | 0      | Ptcd3                 | Unknown              |
| DMR4:100356701 | 4 | 100356701 | 500   | 1  | 1.70E-07 | 0.51   | 0   | 0      |                       |                      |
| DMR4:105520501 | 4 | 105520501 | 2700  | 1  | 6.97E-07 | 4.259  | 16  | 0.5926 |                       |                      |
| DMR4:106904301 | 4 | 106904301 | 700   | 1  | 1.18E-08 | 5.752  | 1   | 0.1429 |                       |                      |
| DMR4:110176401 | 4 | 110176401 | 300   | 1  | 5.66E-07 | 28.043 | 0   | 0      |                       |                      |
| DMR4:112617501 | 4 | 112617501 | 200   | 1  | 3.89E-07 | 0.215  | 1   | 0.5    |                       |                      |
| DMR4:116072401 | 4 | 116072401 | 600   | 1  | 4.08E-07 | 0.401  | 5   | 0.8333 |                       |                      |
| DMR4:117678701 | 4 | 117678701 | 1200  | 1  | 4.66E-10 | 0.295  | 42  | 3.5    | Figla                 | Transcription        |
| DMR4:119307701 | 4 | 119307701 | 200   | 1  | 1.44E-07 | 0.608  | 0   | 0      | Arhgap25              | Unknown              |
| DMR4:119456501 | 4 | 119456501 | 200   | 1  | 2.99E-07 | 0.525  | 1   | 0.5    | Vom1r102              |                      |
| DMR4:119526901 | 4 | 119526901 | 300   | 1  | 7.98E-07 | 0.522  | 5   | 1.6667 | Ap1f                  |                      |
| DMR4:121333701 | 4 | 121333701 | 1000  | 1  | 2.26E-07 | 0.46   | 9   | 0.9    | Chchd6                | Transcription        |
| DMR4:121622301 | 4 | 121622301 | 700   | 1  | 1.90E-07 | 0.424  | 7   | 1      | Txnrd3                | Metabolism           |
| DMR4:122649001 | 4 | 122649001 | 2400  | 1  | 1.89E-07 | 0.616  | 10  | 0.4167 | Nup210                | Cytoskeleton         |
| DMR4:123261801 | 4 | 123261801 | 400   | 1  | 7.99E-07 | 0.503  | 5   | 1.25   | SNORA17               |                      |
| DMR4:123751401 | 4 | 123751401 | 1000  | 1  | 7.65E-07 | 0.438  | 10  | 1      | Ccdc174               |                      |
| DMR4:124617201 | 4 | 124617201 | 500   | 1  | 5.53E-07 | 0.496  | 1   | 0.2    |                       |                      |
| DMR4:125118701 | 4 | 125118701 | 200   | 1  | 6.80E-07 | 0.559  | 0   | 0      |                       |                      |
| DMR4:125801401 | 4 | 125801401 | 1200  | 2  | 9.50E-12 | 0.596  | 11  | 0.9167 | Magi1                 |                      |
| DMR4:132506101 | 4 | 132506101 | 200   | 1  | 2.07E-07 | 0.554  | 1   | 0.5    |                       |                      |
| DMR4:132783301 | 4 | 132783301 | 1200  | 1  | 2.22E-07 | 0.386  | 13  | 1.0833 |                       |                      |
| DMR4:132935101 | 4 | 132935101 | 2300  | 6  | 2.41E-11 | 0.62   | 25  | 1.087  |                       |                      |
| DMR4:132968101 | 4 | 132968101 | 500   | 1  | 8.03E-07 | 0.575  | 0   | 0      |                       |                      |
| DMR4:133393601 | 4 | 133393601 | 600   | 1  | 7.18E-07 | 0.497  | 0   | 0      |                       |                      |
| DMR4:145985301 | 4 | 145985301 | 300   | 1  | 1.50E-08 | 0.502  | 0   | 0      | Atp2b2                | Metabolism           |
| DMR4:146258501 | 4 | 146258501 | 500   | 2  | 1.19E-09 | 0.308  | 15  | 3      |                       |                      |
| DMR4:146538701 | 4 | 146538701 | 10100 | 2  | 2.22E-07 | 0.621  | 295 | 2.9208 |                       |                      |
| DMR4:148156101 | 4 | 148156101 | 600   | 2  | 1.42E-07 | 0.457  | 4   | 0.6667 | Washc2c               |                      |

|                |   |           |       |   |          |       |      |         |                               |                         |
|----------------|---|-----------|-------|---|----------|-------|------|---------|-------------------------------|-------------------------|
| DMR4:149384301 | 4 | 149384301 | 200   | 1 | 9.53E-08 | 0.473 | 0    | 0       | AABR07061848.1                |                         |
| DMR4:149847601 | 4 | 149847601 | 200   | 1 | 7.65E-07 | 0.439 | 0    | 0       |                               |                         |
| DMR4:149849201 | 4 | 149849201 | 900   | 1 | 2.09E-08 | 0.549 | 10   | 1.1111  |                               |                         |
| DMR4:155617101 | 4 | 155617101 | 900   | 1 | 1.47E-07 | 0.397 | 13   | 1.4444  | Slc2a3                        | Transport               |
| DMR4:157106001 | 4 | 157106001 | 200   | 1 | 2.23E-07 | 0.236 | 7    | 3.5     | C1rl                          | Protease                |
| DMR4:157157101 | 4 | 157157101 | 700   | 1 | 1.25E-07 | 0.28  | 5    | 0.7143  | C1s                           | Immune                  |
| DMR4:158928301 | 4 | 158928301 | 800   | 1 | 3.58E-08 | 0.367 | 6    | 0.75    |                               |                         |
| DMR4:160444901 | 4 | 160444901 | 700   | 1 | 9.93E-07 | 0.501 | 8    | 1.1429  |                               |                         |
| DMR4:162231801 | 4 | 162231801 | 300   | 1 | 4.51E-07 | 0.419 | 2    | 0.6667  | LOC689757                     | Development             |
| DMR4:169807501 | 4 | 169807501 | 1200  | 1 | 4.77E-08 | 0.506 | 21   | 1.75    | Grin2b                        | Receptor                |
| DMR4:170965501 | 4 | 170965501 | 400   | 1 | 7.94E-07 | 0.521 | 2    | 0.5     | Pde6h                         | Metabolism              |
| DMR4:171684301 | 4 | 171684301 | 500   | 1 | 7.31E-07 | 0.586 | 0    | 0       |                               |                         |
| DMR4:172140201 | 4 | 172140201 | 400   | 1 | 2.48E-07 | 0.52  | 0    | 0       | Mgst1                         | Metabolism              |
| DMR4:173488701 | 4 | 173488701 | 200   | 2 | 2.69E-17 | 0.081 | 5    | 2.5     |                               |                         |
| DMR4:173656101 | 4 | 173656101 | 300   | 1 | 1.48E-08 | 0.339 | 1    | 0.3333  |                               |                         |
| DMR4:173671101 | 4 | 173671101 | 900   | 1 | 9.15E-07 | 0.594 | 0    | 0       |                               |                         |
| DMR4:175647901 | 4 | 175647901 | 1200  | 1 | 6.94E-07 | 0.442 | 6    | 0.5     | Pde3a                         | Signaling               |
| DMR4:176637401 | 4 | 176637401 | 300   | 1 | 3.70E-07 | 0.413 | 0    | 0       | Spx;Gys2                      | Metabolism              |
| DMR4:177617801 | 4 | 177617801 | 400   | 1 | 7.93E-11 | 0.435 | 3    | 0.75    |                               |                         |
| DMR4:178003401 | 4 | 178003401 | 600   | 1 | 5.70E-07 | 3.114 | 6    | 1       |                               |                         |
| DMR4:179166901 | 4 | 179166901 | 300   | 1 | 7.12E-07 | 0.406 | 0    | 0       |                               |                         |
| DMR4:179635001 | 4 | 179635001 | 1600  | 1 | 1.40E-09 | 0.555 | 27   | 1.6875  |                               |                         |
| DMR4:179683201 | 4 | 179683201 | 1000  | 1 | 5.45E-07 | 0.437 | 17   | 1.7     | Lmntd1                        |                         |
| DMR4:181925901 | 4 | 181925901 | 300   | 2 | 1.56E-07 | 0.547 | 2    | 0.6667  | Ccdc91                        | Unknown                 |
| DMR4:182173101 | 4 | 182173101 | 200   | 1 | 7.88E-07 | 0.536 | 0    | 0       |                               |                         |
| DMR4:183093201 | 4 | 183093201 | 1200  | 2 | 1.03E-07 | 0.414 | 16   | 1.3333  |                               |                         |
| DMR5:4747501   | 5 | 4747501   | 500   | 1 | 9.37E-10 | 0.649 | 2    | 0.4     | Rbpj                          | Transcription           |
| DMR5:4789301   | 5 | 4789301   | 900   | 1 | 4.50E-07 | 4.542 | 6    | 0.6667  | Rbpj                          | Transcription           |
| DMR5:9061601   | 5 | 9061601   | 200   | 1 | 5.81E-07 | 0.397 | 4    | 2       | Sgk3                          | Signaling               |
| DMR5:9465901   | 5 | 9465901   | 400   | 1 | 7.31E-07 | 3.331 | 1    | 0.25    |                               |                         |
| DMR5:16714301  | 5 | 16714301  | 1100  | 8 | 2.28E-11 | 0.577 | 1    | 0.0909  | Rps20;snoU54                  | Translation             |
| DMR5:16880601  | 5 | 16880601  | 300   | 1 | 1.79E-08 | 0.616 | 0    | 0       |                               |                         |
| DMR5:18889301  | 5 | 18889301  | 200   | 1 | 6.56E-07 | 0.423 | 0    | 0       |                               |                         |
| DMR5:19536401  | 5 | 19536401  | 400   | 1 | 1.49E-07 | 0.348 | 9    | 2.25    | Nsmaf                         | Signaling               |
| DMR5:22790801  | 5 | 22790801  | 700   | 1 | 2.35E-08 | 0.591 | 3    | 0.4286  | Asph                          |                         |
| DMR5:24350201  | 5 | 24350201  | 400   | 1 | 9.29E-07 | 0.327 | 5    | 1.25    |                               |                         |
| DMR5:37475901  | 5 | 37475901  | 400   | 1 | 3.66E-07 | 0.438 | 4    | 1       |                               |                         |
| DMR5:58462201  | 5 | 58462201  | 600   | 4 | 1.06E-14 | 0.447 | 0    | 0       | Fancg;Pigo;Stoml2             | Metabolism;Cytoskeleton |
| DMR5:60992101  | 5 | 60992101  | 700   | 1 | 4.43E-08 | 0.152 | 15   | 2.1429  | Shb                           |                         |
| DMR5:61094701  | 5 | 61094701  | 2100  | 2 | 3.28E-09 | 0.507 | 25   | 1.1905  |                               |                         |
| DMR5:64470201  | 5 | 64470201  | 1600  | 3 | 2.45E-08 | 0.625 | 8    | 0.5     | LOC108348074                  |                         |
| DMR5:78748501  | 5 | 78748501  | 1700  | 1 | 5.80E-07 | 0.468 | 17   | 1       |                               |                         |
| DMR5:81162901  | 5 | 81162901  | 300   | 1 | 8.97E-08 | 0.379 | 4    | 1.3333  |                               |                         |
| DMR5:91125501  | 5 | 91125501  | 12400 | 4 | 3.58E-09 | 0.595 | 1489 | 12.0081 | pRNA;5_8S_rRNA;AABR07048791.1 |                         |
| DMR5:99920301  | 5 | 99920301  | 1300  | 1 | 1.48E-07 | 0.62  | 9    | 0.6923  | U4                            |                         |
| DMR5:100389801 | 5 | 100389801 | 500   | 1 | 4.83E-07 | 0.554 | 0    | 0       |                               |                         |
| DMR5:102239701 | 5 | 102239701 | 400   | 1 | 3.55E-07 | 0.604 | 3    | 0.75    |                               |                         |
| DMR5:103378601 | 5 | 103378601 | 1400  | 1 | 3.03E-08 | 0.533 | 22   | 1.5714  |                               |                         |
| DMR5:121133301 | 5 | 121133301 | 2800  | 1 | 8.05E-07 | 0.614 | 68   | 2.4286  |                               |                         |
| DMR5:124965301 | 5 | 124965301 | 100   | 1 | 3.12E-07 | 0.163 | 2    | 2       |                               |                         |
| DMR5:126185601 | 5 | 126185601 | 800   | 1 | 1.41E-07 | 0.154 | 17   | 2.125   | Dhcr24;Lexm                   | Metabolism              |
| DMR5:127601001 | 5 | 127601001 | 300   | 1 | 3.92E-08 | 0.32  | 2    | 0.6667  | Slc1a7                        | Transport               |
| DMR5:128332201 | 5 | 128332201 | 500   | 1 | 6.61E-08 | 0.39  | 0    | 0       | Zfyve9                        | Transcription           |
| DMR5:129908001 | 5 | 129908001 | 200   | 2 | 5.66E-10 | 0.545 | 1    | 0.5     |                               |                         |
| DMR5:133240801 | 5 | 133240801 | 500   | 2 | 9.35E-13 | 0.579 | 7    | 1.4     | Trabd2b                       |                         |
| DMR5:134457801 | 5 | 134457801 | 500   | 1 | 2.69E-08 | 0.529 | 4    | 0.8     |                               |                         |
| DMR5:138190901 | 5 | 138190901 | 600   | 2 | 3.44E-07 | 0.486 | 3    | 0.5     | Slc2a1                        | Metabolism              |

|                |   |           |      |    |          |       |     |         |                                                                                 |                              |
|----------------|---|-----------|------|----|----------|-------|-----|---------|---------------------------------------------------------------------------------|------------------------------|
| DMR5:138430101 | 5 | 138430101 | 300  | 2  | 6.36E-08 | 0.545 | 1   | 0.3333  | Ccdc30                                                                          |                              |
| DMR5:138699301 | 5 | 138699301 | 1700 | 2  | 6.60E-11 | 0.299 | 1   | 0.0588  | Guca2b                                                                          | Signaling                    |
| DMR5:139408901 | 5 | 139408901 | 1400 | 1  | 8.27E-07 | 3.411 | 11  | 0.7857  | Scmh1                                                                           | Epigenetic                   |
| DMR5:139518401 | 5 | 139518401 | 1800 | 1  | 1.34E-08 | 0.508 | 14  | 0.7778  |                                                                                 |                              |
| DMR5:144296901 | 5 | 144296901 | 600  | 4  | 1.18E-12 | 0.594 | 0   | 0       | Trappc3                                                                         |                              |
| DMR5:145344601 | 5 | 145344601 | 1300 | 1  | 2.21E-07 | 0.536 | 13  | 1       | U6                                                                              |                              |
| DMR5:145822001 | 5 | 145822001 | 500  | 1  | 4.59E-07 | 0.357 | 0   | 0       |                                                                                 |                              |
| DMR5:146403101 | 5 | 146403101 | 4800 | 23 | 2.79E-15 | 0.636 | 28  | 0.5833  | Csmd2                                                                           | Unknown                      |
| DMR5:149733201 | 5 | 149733201 | 2000 | 2  | 1.13E-08 | 0.522 | 35  | 1.75    |                                                                                 |                              |
| DMR5:151724301 | 5 | 151724301 | 1000 | 2  | 2.21E-08 | 0.635 | 0   | 0       |                                                                                 |                              |
| DMR5:152643201 | 5 | 152643201 | 1400 | 1  | 3.70E-07 | 0.541 | 8   | 0.5714  | Pafah2                                                                          | Metabolism                   |
| DMR5:152821601 | 5 | 152821601 | 200  | 1  | 7.56E-07 | 0.229 | 5   | 2.5     | Man1c1                                                                          | Metabolism                   |
| DMR5:153245401 | 5 | 153245401 | 500  | 1  | 8.77E-07 | 0.483 | 2   | 0.4     | Tmem50a                                                                         |                              |
| DMR5:154051901 | 5 | 154051901 | 400  | 1  | 3.70E-07 | 2.025 | 0   | 0       | Ifnlr1                                                                          | Receptor                     |
| DMR5:154184401 | 5 | 154184401 | 1900 | 1  | 1.04E-09 | 0.299 | 25  | 1.3158  |                                                                                 |                              |
| DMR5:155794701 | 5 | 155794701 | 1000 | 2  | 1.71E-08 | 0.578 | 1   | 0.1     | LOC690206                                                                       | Unknown                      |
| DMR5:156825501 | 5 | 156825501 | 300  | 1  | 8.32E-07 | 0.507 | 0   | 0       |                                                                                 |                              |
| DMR5:158656101 | 5 | 158656101 | 400  | 1  | 4.00E-07 | 0.603 | 0   | 0       | AABR07050265.1                                                                  |                              |
| DMR5:160491001 | 5 | 160491001 | 1100 | 2  | 3.95E-09 | 0.643 | 13  | 1.1818  | Fhad1                                                                           |                              |
| DMR5:160945901 | 5 | 160945901 | 700  | 1  | 2.35E-08 | 0.568 | 0   | 0       |                                                                                 |                              |
| DMR5:162823001 | 5 | 162823001 | 500  | 1  | 4.58E-07 | 0.357 | 2   | 0.4     | Dhrs3                                                                           | Metabolism                   |
| DMR5:165526301 | 5 | 165526301 | 800  | 2  | 2.15E-09 | 0.615 | 2   | 0.25    |                                                                                 |                              |
| DMR5:165581401 | 5 | 165581401 | 1700 | 1  | 1.82E-07 | 0.555 | 13  | 0.7647  |                                                                                 |                              |
| DMR5:165584401 | 5 | 165584401 | 900  | 2  | 5.94E-12 | 0.539 | 14  | 1.5556  |                                                                                 |                              |
| DMR5:165645701 | 5 | 165645701 | 2200 | 1  | 1.22E-09 | 0.47  | 28  | 1.2727  |                                                                                 |                              |
| DMR5:167424001 | 5 | 167424001 | 200  | 1  | 6.05E-07 | 0.322 | 1   | 0.5     | Rere                                                                            | Unknown                      |
| DMR5:167453601 | 5 | 167453601 | 300  | 1  | 8.41E-07 | 0.711 | 0   | 0       | Rere                                                                            | Unknown                      |
| DMR5:168387201 | 5 | 168387201 | 600  | 1  | 1.78E-07 | 8.075 | 3   | 0.5     | Camta1                                                                          | Transcription                |
| DMR5:168936401 | 5 | 168936401 | 200  | 1  | 1.08E-07 | 0.499 | 0   | 0       | Camta1                                                                          | Transcription                |
| DMR5:169041101 | 5 | 169041101 | 300  | 1  | 8.60E-08 | 0.362 | 2   | 0.6667  | Rn60_5_1691.2                                                                   |                              |
| DMR5:169788001 | 5 | 169788001 | 400  | 1  | 3.30E-07 | 0.527 | 0   | 0       |                                                                                 |                              |
| DMR5:170514901 | 5 | 170514901 | 500  | 2  | 3.96E-09 | 0.449 | 1   | 0.2     |                                                                                 |                              |
| DMR5:171079901 | 5 | 171079901 | 400  | 2  | 5.46E-09 | 0.512 | 0   | 0       |                                                                                 |                              |
| DMR5:171344401 | 5 | 171344401 | 600  | 1  | 4.43E-07 | 0.514 | 27  | 4.5     |                                                                                 |                              |
| DMR5:173227301 | 5 | 173227301 | 300  | 1  | 7.24E-08 | 0.581 | 0   | 0       | Vwa1;Tmem88b                                                                    | Extracellular Matrix;Unknown |
| DMR6:1025101   | 6 | 1025101   | 1400 | 1  | 5.17E-07 | 0.658 | 10  | 0.7143  |                                                                                 |                              |
| DMR6:5747701   | 6 | 5747701   | 400  | 1  | 5.05E-08 | 0.42  | 0   | 0       |                                                                                 |                              |
| DMR6:8305001   | 6 | 8305001   | 300  | 1  | 8.25E-09 | 0.53  | 1   | 0.3333  | Slc3a1                                                                          | Metabolism                   |
| DMR6:9620001   | 6 | 9620001   | 2000 | 1  | 2.44E-07 | 0.619 | 11  | 0.55    | AABR07062800.1                                                                  |                              |
| DMR6:9687501   | 6 | 9687501   | 500  | 1  | 7.51E-07 | 4.562 | 11  | 2.2     |                                                                                 |                              |
| DMR6:10481401  | 6 | 10481401  | 500  | 1  | 3.08E-10 | 0.557 | 8   | 1.6     | Tmem247                                                                         |                              |
| DMR6:10513501  | 6 | 10513501  | 1400 | 1  | 8.51E-08 | 0.565 | 15  | 1.0714  | Atp6v1e2                                                                        | Transport                    |
| DMR6:21304501  | 6 | 21304501  | 500  | 1  | 7.67E-07 | 0.51  | 1   | 0.2     | Ltbp1                                                                           | Metabolism                   |
| DMR6:27291001  | 6 | 27291001  | 300  | 1  | 7.48E-09 | 0.352 | 3   | 1       | Cib4                                                                            | Signaling                    |
| DMR6:28330501  | 6 | 28330501  | 500  | 2  | 3.17E-11 | 0.529 | 5   | 1       | Dnmt3a                                                                          | Transcription                |
| DMR6:29281601  | 6 | 29281601  | 200  | 1  | 7.86E-07 | 0.49  | 0   | 0       | Klhl29                                                                          | Transcription                |
| DMR6:30117101  | 6 | 30117101  | 400  | 1  | 7.04E-07 | 0.526 | 9   | 2.25    | Itsn2                                                                           | EST                          |
| DMR6:30628001  | 6 | 30628001  | 5800 | 2  | 3.76E-10 | 0.55  | 727 | 12.5345 | 5_8S_rRNA;AABR07063421.1;AABR07063424.1;LOC257642;AABR07063425.2;AABR07063425.1 |                              |
| DMR6:31048801  | 6 | 31048801  | 3500 | 2  | 2.10E-07 | 0.434 | 197 | 5.6286  | AABR07063462.1                                                                  |                              |
| DMR6:31062801  | 6 | 31062801  | 7100 | 1  | 6.96E-07 | 0.704 | 135 | 1.9014  |                                                                                 |                              |
| DMR6:34163601  | 6 | 34163601  | 500  | 2  | 7.36E-08 | 0.439 | 6   | 1.2     | Ttc32                                                                           |                              |
| DMR6:38470301  | 6 | 38470301  | 600  | 1  | 4.86E-11 | 0.475 | 0   | 0       | Nbas                                                                            | Unknown                      |
| DMR6:41640801  | 6 | 41640801  | 900  | 2  | 3.48E-08 | 0.428 | 23  | 2.5556  |                                                                                 |                              |
| DMR6:44300401  | 6 | 44300401  | 500  | 1  | 3.36E-07 | 0.622 | 13  | 2.6     | Kidins220                                                                       |                              |
| DMR6:47511401  | 6 | 47511401  | 700  | 1  | 4.36E-07 | 5.853 | 5   | 0.7143  |                                                                                 |                              |

|                |   |           |      |   |          |        |    |        |                |                          |
|----------------|---|-----------|------|---|----------|--------|----|--------|----------------|--------------------------|
| DMR6:49144801  | 6 | 49144801  | 300  | 1 | 7.03E-07 | 0.535  | 0  | 0      | Sntg2          | Cytoskeleton             |
| DMR6:49557001  | 6 | 49557001  | 600  | 1 | 3.32E-07 | 0.433  | 0  | 0      |                |                          |
| DMR6:55340901  | 6 | 55340901  | 600  | 2 | 3.49E-08 | 0.446  | 4  | 0.6667 |                |                          |
| DMR6:62044801  | 6 | 62044801  | 400  | 2 | 1.17E-09 | 0.521  | 2  | 0.5    |                |                          |
| DMR6:63331201  | 6 | 63331201  | 1000 | 3 | 2.29E-10 | 0.567  | 0  | 0      |                |                          |
| DMR6:75718501  | 6 | 75718501  | 2300 | 1 | 4.29E-09 | 0.367  | 31 | 1.3478 |                |                          |
| DMR6:77548201  | 6 | 77548201  | 900  | 1 | 2.39E-07 | 0.394  | 24 | 2.6667 |                |                          |
| DMR6:94239701  | 6 | 94239701  | 400  | 2 | 2.13E-07 | 0.661  | 1  | 0.25   |                |                          |
| DMR6:94852401  | 6 | 94852401  | 3100 | 1 | 5.71E-07 | 0.299  | 40 | 1.2903 | Jkamp;Ccdc175  | Receptor                 |
| DMR6:95020101  | 6 | 95020101  | 300  | 1 | 6.10E-07 | 0.701  | 1  | 0.3333 | Rtn1           | Metabolism               |
| DMR6:97274301  | 6 | 97274301  | 400  | 1 | 3.80E-09 | 0.304  | 2  | 0.5    |                |                          |
| DMR6:99857601  | 6 | 99857601  | 500  | 1 | 7.11E-07 | 0.644  | 7  | 1.4    | Rab15          | Signaling                |
| DMR6:105784801 | 6 | 105784801 | 400  | 1 | 1.04E-07 | 0.335  | 5  | 1.25   |                |                          |
| DMR6:106942401 | 6 | 106942401 | 300  | 1 | 1.59E-07 | 0.377  | 3  | 1      | Dpf3           | Transcription            |
| DMR6:108587101 | 6 | 108587101 | 700  | 4 | 2.50E-09 | 0.59   | 1  | 0.1429 | Ltbp2          | Receptor                 |
| DMR6:115372301 | 6 | 115372301 | 300  | 1 | 2.96E-08 | 0.276  | 9  | 3      |                |                          |
| DMR6:117183301 | 6 | 117183301 | 400  | 1 | 9.55E-07 | 0.42   | 2  | 0.5    |                |                          |
| DMR6:122854201 | 6 | 122854201 | 500  | 2 | 1.76E-08 | 0.652  | 1  | 0.2    | Eml5           | Cytoskeleton             |
| DMR6:122977901 | 6 | 122977901 | 300  | 1 | 6.28E-08 | 4.893  | 3  | 1      | Ttc8           | Metabolism               |
| DMR6:125363601 | 6 | 125363601 | 400  | 1 | 6.41E-07 | 0.633  | 4  | 1      |                |                          |
| DMR6:125756701 | 6 | 125756701 | 400  | 3 | 4.57E-10 | 0.574  | 3  | 0.75   | Trip11         | Receptor                 |
| DMR6:126421401 | 6 | 126421401 | 300  | 1 | 9.53E-10 | 0.576  | 0  | 0      |                |                          |
| DMR6:128326801 | 6 | 128326801 | 500  | 2 | 1.70E-12 | 0.484  | 2  | 0.4    |                |                          |
| DMR6:129385801 | 6 | 129385801 | 500  | 1 | 1.47E-07 | 0.439  | 3  | 0.6    | AABR07065460.1 |                          |
| DMR6:131082501 | 6 | 131082501 | 1100 | 3 | 2.49E-11 | 0.497  | 17 | 1.5455 |                |                          |
| DMR6:131886101 | 6 | 131886101 | 200  | 1 | 2.68E-07 | 0.205  | 10 | 5      | Bcl11b         | Transcription            |
| DMR6:132823101 | 6 | 132823101 | 1800 | 1 | 9.45E-07 | 0.519  | 47 | 2.6111 | Wdr25          |                          |
| DMR6:133002701 | 6 | 133002701 | 700  | 1 | 6.98E-07 | 0.606  | 7  | 1      |                |                          |
| DMR6:134502801 | 6 | 134502801 | 2300 | 1 | 2.34E-07 | 0.605  | 61 | 2.6522 |                |                          |
| DMR6:134608401 | 6 | 134608401 | 400  | 1 | 1.04E-08 | 0.528  | 0  | 0      |                |                          |
| DMR6:137062601 | 6 | 137062601 | 800  | 1 | 8.66E-09 | 0.461  | 2  | 0.25   | LOC691485      | Unknown                  |
| DMR6:137124701 | 6 | 137124701 | 400  | 1 | 9.10E-07 | 0.292  | 2  | 0.5    | AABR07065602.2 |                          |
| DMR6:138198701 | 6 | 138198701 | 2400 | 2 | 1.11E-08 | 0.498  | 8  | 0.3333 | Ighm           |                          |
| DMR6:139664801 | 6 | 139664801 | 200  | 1 | 9.69E-07 | 0.483  | 0  | 0      | AABR07065705.1 |                          |
| DMR6:141673301 | 6 | 141673301 | 500  | 1 | 1.86E-08 | 0.559  | 0  | 0      |                |                          |
| DMR6:142065001 | 6 | 142065001 | 300  | 1 | 5.40E-07 | 0.335  | 5  | 1.6667 | AABR07065811.1 |                          |
| DMR6:142772501 | 6 | 142772501 | 200  | 1 | 2.63E-07 | 0.394  | 1  | 0.5    |                |                          |
| DMR6:143220801 | 6 | 143220801 | 800  | 2 | 8.01E-09 | 10.117 | 5  | 0.625  | AABR07065844.1 |                          |
| DMR6:144740401 | 6 | 144740401 | 200  | 1 | 1.95E-07 | 0.227  | 0  | 0      | Ptprn2         | Signaling                |
| DMR6:145445601 | 6 | 145445601 | 200  | 2 | 6.73E-08 | 0.326  | 0  | 0      |                |                          |
| DMR7:672201    | 7 | 672201    | 1900 | 1 | 4.08E-07 | 0.553  | 11 | 0.5789 |                |                          |
| DMR7:11717201  | 7 | 11717201  | 400  | 1 | 4.45E-07 | 0.55   | 5  | 1.25   | Sppl2b;Lsm7    | Proteolysis;Translation  |
| DMR7:12072201  | 7 | 12072201  | 1800 | 1 | 3.33E-07 | 0.612  | 15 | 0.8333 | Atp8b3;Onecut3 | Metabolism;Transcription |
| DMR7:12209401  | 7 | 12209401  | 700  | 1 | 6.93E-08 | 0.622  | 0  | 0      | Plk5           | Unknown                  |
| DMR7:12417201  | 7 | 12417201  | 400  | 1 | 6.99E-07 | 0.371  | 10 | 2.5    | Midn;Atp5d     | Development;Transport    |
| DMR7:13768501  | 7 | 13768501  | 2900 | 2 | 9.81E-10 | 0.47   | 28 | 0.9655 |                |                          |
| DMR7:17238001  | 7 | 17238001  | 100  | 1 | 8.47E-07 | 21.885 | 0  | 0      |                |                          |
| DMR7:24628201  | 7 | 24628201  | 1100 | 2 | 2.29E-08 | 0.636  | 15 | 1.3636 | Cry1;Mterf2    | DNA Repair               |
| DMR7:26691801  | 7 | 26691801  | 200  | 1 | 6.46E-07 | 0.433  | 1  | 0.5    | Chst11;U6      | Metabolism               |
| DMR7:29732201  | 7 | 29732201  | 500  | 1 | 3.32E-09 | 0.53   | 2  | 0.4    |                |                          |
| DMR7:49253201  | 7 | 49253201  | 600  | 1 | 1.48E-07 | 0.464  | 1  | 0.1667 | Accs3;SNORA17  | Metabolism               |
| DMR7:53702501  | 7 | 53702501  | 1400 | 2 | 3.86E-07 | 0.539  | 14 | 1      | Zdhhc17        | Transcription            |
| DMR7:54628301  | 7 | 54628301  | 1500 | 2 | 1.02E-09 | 0.472  | 18 | 1.2    |                |                          |
| DMR7:61909501  | 7 | 61909501  | 200  | 1 | 3.86E-07 | 0.373  | 0  | 0      |                |                          |
| DMR7:62088001  | 7 | 62088001  | 400  | 1 | 1.10E-07 | 0.581  | 8  | 2      |                |                          |
| DMR7:63205901  | 7 | 63205901  | 1100 | 1 | 1.85E-08 | 0.67   | 12 | 1.0909 |                |                          |
| DMR7:63289801  | 7 | 63289801  | 800  | 1 | 6.72E-08 | 0.502  | 6  | 0.75   |                |                          |
| DMR7:66949901  | 7 | 66949901  | 2000 | 2 | 1.29E-07 | 0.635  | 26 | 1.3    | Ppm1h          | Signaling                |

|                |   |           |      |   |          |       |    |        |                               |                               |
|----------------|---|-----------|------|---|----------|-------|----|--------|-------------------------------|-------------------------------|
| DMR7:69988101  | 7 | 69988101  | 1400 | 1 | 8.61E-07 | 0.498 | 25 | 1.7857 | RGD1564306                    |                               |
| DMR7:70941501  | 7 | 70941501  | 300  | 3 | 5.22E-17 | 0.532 | 4  | 1.3333 | Stat6                         | Transcription                 |
| DMR7:71980201  | 7 | 71980201  | 700  | 1 | 3.98E-07 | 0.551 | 0  | 0      | Cpq                           | Metabolism                    |
| DMR7:77116001  | 7 | 77116001  | 500  | 1 | 9.47E-10 | 0.433 | 0  | 0      |                               |                               |
| DMR7:77321401  | 7 | 77321401  | 1200 | 2 | 4.00E-08 | 0.592 | 2  | 0.1667 |                               |                               |
| DMR7:77626801  | 7 | 77626801  | 600  | 1 | 3.34E-08 | 0.387 | 5  | 0.8333 |                               |                               |
| DMR7:80703101  | 7 | 80703101  | 500  | 3 | 2.11E-10 | 0.581 | 4  | 0.8    | Oxr1                          | Development                   |
| DMR7:92398601  | 7 | 92398601  | 700  | 1 | 3.37E-08 | 0.403 | 3  | 0.4286 |                               |                               |
| DMR7:92791001  | 7 | 92791001  | 1400 | 1 | 1.17E-07 | 0.383 | 16 | 1.1429 | Ext1                          | Metabolism                    |
| DMR7:94796701  | 7 | 94796701  | 100  | 1 | 8.52E-07 | 0.207 | 1  | 1      | Deptor                        |                               |
| DMR7:95096401  | 7 | 95096401  | 300  | 1 | 4.21E-07 | 0.404 | 4  | 1.3333 | Col14a1                       | Cytoskeleton                  |
| DMR7:97894501  | 7 | 97894501  | 300  | 1 | 1.04E-07 | 0.531 | 1  | 0.3333 | RGD1310852                    | Unknown                       |
| DMR7:98936001  | 7 | 98936001  | 300  | 1 | 1.48E-07 | 0.3   | 10 | 3.3333 | Mtss1                         | Cytoskeleton                  |
| DMR7:99152501  | 7 | 99152501  | 400  | 1 | 3.86E-07 | 0.617 | 0  | 0      | LOC108348266                  |                               |
| DMR7:100014801 | 7 | 100014801 | 1200 | 1 | 8.26E-08 | 0.588 | 4  | 0.3333 |                               |                               |
| DMR7:115180001 | 7 | 115180001 | 1800 | 1 | 6.44E-07 | 0.455 | 25 | 1.3889 |                               |                               |
| DMR7:119494001 | 7 | 119494001 | 1000 | 2 | 2.18E-10 | 0.321 | 6  | 0.6    | Ncf4                          | Development                   |
| DMR7:120415501 | 7 | 120415501 | 300  | 2 | 3.50E-11 | 0.528 | 1  | 0.3333 | AC096473.3                    |                               |
| DMR7:121002201 | 7 | 121002201 | 400  | 1 | 7.31E-09 | 0.478 | 1  | 0.25   | Dnal4;Nptxr                   | Cytoskeleton                  |
| DMR7:121631101 | 7 | 121631101 | 200  | 2 | 2.54E-13 | 0.262 | 6  | 3      |                               |                               |
| DMR7:121944301 | 7 | 121944301 | 400  | 1 | 3.75E-07 | 0.479 | 1  | 0.25   | Tnrc6b;Rpl26-ps1              | Apoptosis                     |
| DMR7:122511101 | 7 | 122511101 | 300  | 1 | 4.95E-07 | 0.396 | 1  | 0.3333 |                               |                               |
| DMR7:122971801 | 7 | 122971801 | 300  | 1 | 9.37E-08 | 0.345 | 1  | 0.3333 | Rangap1;Zc3h7b                | Signaling;Transcription       |
| DMR7:123483801 | 7 | 123483801 | 500  | 2 | 4.93E-09 | 0.546 | 0  | 0      | Centpm;LOC688613;LOC108351520 |                               |
| DMR7:125536301 | 7 | 125536301 | 1200 | 1 | 5.29E-07 | 0.604 | 15 | 1.25   |                               |                               |
| DMR7:126211101 | 7 | 126211101 | 400  | 1 | 5.43E-07 | 0.438 | 1  | 0.25   |                               |                               |
| DMR7:126488001 | 7 | 126488001 | 500  | 1 | 4.45E-07 | 0.164 | 0  | 0      |                               |                               |
| DMR7:128013801 | 7 | 128013801 | 500  | 1 | 2.23E-07 | 0.584 | 15 | 3      | AABR07058618.1                |                               |
| DMR7:129382401 | 7 | 129382401 | 800  | 1 | 5.18E-08 | 0.48  | 1  | 0.125  | LOC108351524                  |                               |
| DMR7:129412701 | 7 | 129412701 | 200  | 1 | 4.35E-07 | 0.3   | 0  | 0      | LOC108351524                  |                               |
| DMR7:130184701 | 7 | 130184701 | 300  | 1 | 7.72E-09 | 0.471 | 2  | 0.6667 | Dennd6b                       |                               |
| DMR7:131253401 | 7 | 131253401 | 2100 | 1 | 4.30E-08 | 0.293 | 22 | 1.0476 |                               |                               |
| DMR7:133000201 | 7 | 133000201 | 200  | 1 | 1.23E-07 | 0.329 | 1  | 0.5    | Lrrk2                         | Unknown                       |
| DMR7:135299101 | 7 | 135299101 | 1400 | 1 | 5.73E-07 | 0.535 | 14 | 1      |                               |                               |
| DMR7:135855601 | 7 | 135855601 | 1100 | 1 | 4.12E-07 | 0.508 | 5  | 0.4545 | Twf1                          | Cytoskeleton                  |
| DMR7:136860401 | 7 | 136860401 | 1300 | 1 | 8.84E-09 | 5.816 | 4  | 0.3077 | Nell2                         | Signaling                     |
| DMR7:137257401 | 7 | 137257401 | 800  | 1 | 4.36E-07 | 0.202 | 19 | 2.375  | Ano6                          | Signaling                     |
| DMR7:137961001 | 7 | 137961001 | 300  | 1 | 6.47E-07 | 0.334 | 6  | 2      |                               |                               |
| DMR7:138069501 | 7 | 138069501 | 1300 | 1 | 9.03E-10 | 0.312 | 11 | 0.8462 | U6                            |                               |
| DMR7:140571301 | 7 | 140571301 | 3900 | 1 | 7.69E-07 | 0.63  | 5  | 0.1282 | Dhh                           | Signaling                     |
| DMR7:142210001 | 7 | 142210001 | 1800 | 4 | 4.56E-13 | 0.369 | 43 | 2.3889 | Pou6f1                        | Transcription                 |
| DMR7:142476301 | 7 | 142476301 | 1300 | 2 | 1.79E-09 | 0.638 | 22 | 1.6923 |                               |                               |
| DMR7:143246701 | 7 | 143246701 | 600  | 1 | 1.34E-07 | 0.407 | 0  | 0      | Rn50_7_1411.3                 |                               |
| DMR8:8224501   | 8 | 8224501   | 300  | 1 | 6.37E-07 | 0.374 | 10 | 3.3333 | Cntn5                         | Extracellular Matrix          |
| DMR8:10626201  | 8 | 10626201  | 3500 | 1 | 5.07E-08 | 2.005 | 41 | 1.1714 |                               |                               |
| DMR8:11928201  | 8 | 11928201  | 400  | 2 | 2.58E-08 | 0.547 | 6  | 1.5    | Ccdc82;Maml2                  | Transcription                 |
| DMR8:12109101  | 8 | 12109101  | 900  | 1 | 7.46E-07 | 0.587 | 4  | 0.4444 | Maml2                         | Transcription                 |
| DMR8:14259101  | 8 | 14259101  | 600  | 3 | 1.10E-22 | 0.455 | 26 | 4.3333 | Slc36a4                       | Transport                     |
| DMR8:22853601  | 8 | 22853601  | 500  | 1 | 7.34E-07 | 0.379 | 13 | 2.6    | Dock6;Angptl8                 | Signaling                     |
| DMR8:23891701  | 8 | 23891701  | 600  | 1 | 5.68E-08 | 0.507 | 10 | 1.6667 | Bbs9                          | Development                   |
| DMR8:27896101  | 8 | 27896101  | 300  | 1 | 1.19E-08 | 0.366 | 0  | 0      | Glb1l3                        | Golgi                         |
| DMR8:28155201  | 8 | 28155201  | 600  | 2 | 1.66E-08 | 0.61  | 6  | 1      | Jam3                          | Cytoskeleton                  |
| DMR8:31200101  | 8 | 31200101  | 500  | 2 | 3.89E-10 | 0.6   | 0  | 0      |                               |                               |
| DMR8:33562301  | 8 | 33562301  | 900  | 1 | 1.32E-08 | 0.594 | 2  | 0.2222 | Fli1                          | Transcription                 |
| DMR8:36532101  | 8 | 36532101  | 1200 | 2 | 7.01E-10 | 0.384 | 16 | 1.3333 |                               |                               |
| DMR8:40010701  | 8 | 40010701  | 200  | 1 | 5.44E-07 | 0.17  | 4  | 2      | Esam;Vsig2;Nrgn               | Cytoskeleton;Immune;Signaling |
| DMR8:40062201  | 8 | 40062201  | 300  | 2 | 1.01E-08 | 0.314 | 1  | 0.3333 | Spa17                         | Immune                        |

|                |   |           |      |   |          |       |    |        |                               |                      |
|----------------|---|-----------|------|---|----------|-------|----|--------|-------------------------------|----------------------|
| DMR8:46838001  | 8 | 46838001  | 300  | 1 | 3.22E-08 | 0.581 | 1  | 0.3333 | Grik4                         | Signaling            |
| DMR8:46877601  | 8 | 46877601  | 300  | 1 | 9.75E-07 | 0.291 | 11 | 3.6667 | Grik4                         | Signaling            |
| DMR8:47208201  | 8 | 47208201  | 500  | 2 | 2.78E-08 | 0.445 | 3  | 0.6    |                               |                      |
| DMR8:47813601  | 8 | 47813601  | 400  | 1 | 2.08E-08 | 0.454 | 2  | 0.5    |                               |                      |
| DMR8:47828701  | 8 | 47828701  | 500  | 1 | 5.15E-07 | 0.485 | 0  | 0      |                               |                      |
| DMR8:48584501  | 8 | 48584501  | 2100 | 2 | 2.87E-08 | 0.425 | 60 | 2.8571 | Ccdc153;Pdzd3;Nlrx1           | Transcription        |
| DMR8:48794901  | 8 | 48794901  | 1500 | 1 | 1.61E-08 | 0.283 | 0  | 0      | U6;AC105645.4;Bcl9l           |                      |
| DMR8:49141701  | 8 | 49141701  | 800  | 1 | 2.00E-07 | 0.483 | 20 | 2.5    | Kmt2a                         |                      |
| DMR8:50360701  | 8 | 50360701  | 300  | 2 | 2.92E-11 | 0.443 | 1  | 0.3333 | Sik3                          | Receptor             |
| DMR8:50629801  | 8 | 50629801  | 600  | 1 | 3.64E-07 | 0.512 | 0  | 0      |                               |                      |
| DMR8:50892501  | 8 | 50892501  | 200  | 1 | 5.19E-08 | 0.642 | 1  | 0.5    |                               |                      |
| DMR8:51622401  | 8 | 51622401  | 300  | 1 | 8.22E-07 | 0.409 | 0  | 0      |                               |                      |
| DMR8:52210401  | 8 | 52210401  | 1400 | 1 | 6.00E-07 | 0.516 | 33 | 2.3571 |                               |                      |
| DMR8:52452001  | 8 | 52452001  | 500  | 1 | 7.00E-08 | 0.456 | 2  | 0.4    |                               |                      |
| DMR8:52951601  | 8 | 52951601  | 500  | 1 | 9.38E-07 | 0.405 | 0  | 0      |                               |                      |
| DMR8:59370401  | 8 | 59370401  | 400  | 1 | 9.07E-07 | 0.653 | 0  | 0      |                               |                      |
| DMR8:59755201  | 8 | 59755201  | 300  | 1 | 4.40E-07 | 0.561 | 1  | 0.3333 | Ube2q2                        | Metabolism           |
| DMR8:61176301  | 8 | 61176301  | 600  | 1 | 4.77E-07 | 0.619 | 0  | 0      |                               |                      |
| DMR8:61460801  | 8 | 61460801  | 400  | 2 | 2.11E-09 | 0.55  | 3  | 0.75   |                               |                      |
| DMR8:62782201  | 8 | 62782201  | 100  | 1 | 8.74E-07 | 0.451 | 0  | 0      | Cyp11a1                       | Metabolism           |
| DMR8:65351301  | 8 | 65351301  | 1400 | 1 | 9.67E-08 | 0.412 | 28 | 2      | Rn50_8_0651.1                 |                      |
| DMR8:68018601  | 8 | 68018601  | 1100 | 1 | 6.93E-09 | 0.554 | 12 | 1.0909 | U6                            |                      |
| DMR8:68284601  | 8 | 68284601  | 400  | 1 | 6.98E-09 | 0.405 | 0  | 0      | Map2k5                        | Signaling            |
| DMR8:73883001  | 8 | 73883001  | 600  | 1 | 1.80E-07 | 0.569 | 2  | 0.3333 |                               |                      |
| DMR8:74490001  | 8 | 74490001  | 200  | 1 | 1.71E-08 | 0.12  | 2  | 1      |                               |                      |
| DMR8:75922801  | 8 | 75922801  | 400  | 1 | 8.77E-07 | 0.485 | 6  | 1.5    |                               |                      |
| DMR8:77727601  | 8 | 77727601  | 300  | 2 | 2.72E-08 | 0.586 | 0  | 0      | Aldh1a2                       | Metabolism           |
| DMR8:84899301  | 8 | 84899301  | 300  | 1 | 6.98E-07 | 0.611 | 10 | 3.3333 | AABR07070801.1;AABR07070802.1 |                      |
| DMR8:87257001  | 8 | 87257001  | 300  | 1 | 2.69E-10 | 0.567 | 0  | 0      | Filip1                        | Unknown              |
| DMR8:88267801  | 8 | 88267801  | 600  | 1 | 1.02E-09 | 0.473 | 3  | 0.5    |                               |                      |
| DMR8:96286401  | 8 | 96286401  | 200  | 1 | 6.21E-08 | 0.232 | 1  | 0.5    |                               |                      |
| DMR8:97253301  | 8 | 97253301  | 900  | 1 | 3.43E-07 | 0.399 | 22 | 2.4444 |                               |                      |
| DMR8:98971501  | 8 | 98971501  | 200  | 1 | 6.49E-10 | 0.198 | 1  | 0.5    |                               |                      |
| DMR8:102378101 | 8 | 102378101 | 400  | 1 | 1.39E-07 | 0.423 | 2  | 0.5    | Slc9a9                        | Transport            |
| DMR8:103346901 | 8 | 103346901 | 300  | 1 | 3.24E-07 | 0.396 | 6  | 2      | Paqr9;LOC501038               | Receptor             |
| DMR8:104407201 | 8 | 104407201 | 300  | 1 | 2.24E-08 | 0.412 | 1  | 0.3333 | Rasa2                         |                      |
| DMR8:104595001 | 8 | 104595001 | 1700 | 1 | 5.58E-09 | 0.29  | 13 | 0.7647 | Zbtb38                        | Transcription        |
| DMR8:106367101 | 8 | 106367101 | 400  | 3 | 3.58E-08 | 0.58  | 0  | 0      | Nmnat3                        | Metabolism           |
| DMR8:107637901 | 8 | 107637901 | 200  | 2 | 1.74E-07 | 0.625 | 0  | 0      | Mras                          |                      |
| DMR8:108762401 | 8 | 108762401 | 1700 | 1 | 1.49E-07 | 0.343 | 33 | 1.9412 | Il20rb                        | Receptor             |
| DMR8:112313301 | 8 | 112313301 | 800  | 1 | 2.18E-08 | 6.149 | 10 | 1.25   |                               |                      |
| DMR8:116495501 | 8 | 116495501 | 900  | 1 | 1.60E-07 | 0.272 | 24 | 2.6667 | Rbm5                          | Translation          |
| DMR8:119071001 | 8 | 119071001 | 400  | 1 | 9.59E-07 | 0.554 | 2  | 0.5    | Prss42                        | Protease             |
| DMR8:119745901 | 8 | 119745901 | 600  | 1 | 4.97E-07 | 0.254 | 0  | 0      | Dclk3                         | Cytoskeleton         |
| DMR8:121577001 | 8 | 121577001 | 400  | 1 | 1.40E-07 | 0.646 | 2  | 0.5    | AABR07071549.1                |                      |
| DMR8:121929401 | 8 | 121929401 | 300  | 1 | 7.57E-07 | 3.189 | 7  | 2.3333 | Pdcc6ip                       | Apoptosis            |
| DMR8:124971201 | 8 | 124971201 | 600  | 1 | 7.87E-07 | 9.055 | 6  | 1      | Rbms3                         | Epigenetic           |
| DMR8:126283201 | 8 | 126283201 | 200  | 1 | 1.49E-07 | 0.167 | 8  | 4      |                               |                      |
| DMR8:127026801 | 8 | 127026801 | 1000 | 1 | 3.74E-07 | 0.622 | 6  | 0.6    |                               |                      |
| DMR8:127473901 | 8 | 127473901 | 1100 | 1 | 1.95E-07 | 0.422 | 1  | 0.0909 | Itga9                         | Extracellular Matrix |
| DMR8:127963501 | 8 | 127963501 | 400  | 1 | 4.38E-07 | 0.343 | 5  | 1.25   | Oxsr1                         | Signaling            |
| DMR8:128397201 | 8 | 128397201 | 300  | 1 | 7.75E-07 | 0.493 | 4  | 1.3333 | Scn10a                        | Transport            |
| DMR8:129589701 | 8 | 129589701 | 1200 | 1 | 3.85E-07 | 0.421 | 12 | 1      |                               |                      |
| DMR8:131357801 | 8 | 131357801 | 200  | 1 | 2.31E-07 | 0.199 | 2  | 1      |                               |                      |
| DMR8:131661801 | 8 | 131661801 | 200  | 1 | 2.42E-07 | 0.464 | 2  | 1      |                               |                      |
| DMR8:132563001 | 8 | 132563001 | 400  | 1 | 2.68E-07 | 0.516 | 0  | 0      | Limd1                         | Transcription        |
| DMR9:2002401   | 9 | 2002401   | 2600 | 1 | 9.27E-08 | 0.518 | 17 | 0.6538 |                               |                      |
| DMR9:2030101   | 9 | 2030101   | 1100 | 1 | 9.16E-07 | 0.4   | 8  | 0.7273 |                               |                      |



|                |    |           |      |   |          |       |    |        |                                |                       |
|----------------|----|-----------|------|---|----------|-------|----|--------|--------------------------------|-----------------------|
| DMR9:10507301  | 9  | 10507301  | 500  | 3 | 8.34E-19 | 0.488 | 2  | 0.4    |                                |                       |
| DMR9:10852401  | 9  | 10852401  | 200  | 1 | 6.73E-07 | 0.665 | 0  | 0      | Dpp9                           | Proteolysis           |
| DMR9:12833201  | 9  | 12833201  | 300  | 1 | 2.55E-07 | 0.351 | 0  | 0      | Rftn1                          | Unknown               |
| DMR9:13150201  | 9  | 13150201  | 200  | 1 | 1.89E-08 | 0.336 | 3  | 1.5    | Kif6                           | Cytoskeleton          |
| DMR9:13406001  | 9  | 13406001  | 700  | 2 | 3.59E-08 | 0.665 | 5  | 0.7143 |                                |                       |
| DMR9:13496601  | 9  | 13496601  | 1000 | 1 | 1.18E-07 | 0.424 | 20 | 2      | Daam2;Mocs1                    | Cytoskeleton;Unknown  |
| DMR9:14866501  | 9  | 14866501  | 800  | 2 | 3.37E-09 | 0.413 | 13 | 1.625  | LOC680920                      |                       |
| DMR9:15211101  | 9  | 15211101  | 300  | 1 | 2.48E-08 | 0.282 | 5  | 1.6667 | Tfeb                           | Transcription         |
| DMR9:16621401  | 9  | 16621401  | 1100 | 3 | 2.03E-09 | 0.489 | 5  | 0.4545 | Mea1;Klhdc3;Rrp36;LOC108348250 | Unknown;Transcription |
| DMR9:17007601  | 9  | 17007601  | 2000 | 1 | 7.17E-07 | 0.565 | 24 | 1.2    |                                |                       |
| DMR9:19377801  | 9  | 19377801  | 300  | 1 | 2.60E-08 | 0.44  | 0  | 0      | Clic5                          | Transport             |
| DMR9:19823001  | 9  | 19823001  | 800  | 1 | 2.83E-09 | 0.444 | 5  | 0.625  | Cyp39a1                        | Metabolism            |
| DMR9:20437201  | 9  | 20437201  | 500  | 1 | 2.46E-07 | 0.549 | 2  | 0.4    |                                |                       |
| DMR9:21797201  | 9  | 21797201  | 500  | 1 | 4.34E-07 | 4.563 | 4  | 0.8    |                                |                       |
| DMR9:21931301  | 9  | 21931301  | 400  | 1 | 7.52E-07 | 3.985 | 8  | 2      |                                |                       |
| DMR9:23434201  | 9  | 23434201  | 200  | 1 | 2.58E-07 | 0.263 | 0  | 0      | LOC688459;Cyp2ac1              | Metabolism            |
| DMR9:30493301  | 9  | 30493301  | 800  | 2 | 6.09E-08 | 0.589 | 1  | 0.125  | Col9a1                         | Extracellular Matrix  |
| DMR9:30838401  | 9  | 30838401  | 3700 | 1 | 2.59E-07 | 6.014 | 50 | 1.3514 | Col19a1                        | Cytoskeleton          |
| DMR9:40512501  | 9  | 40512501  | 7500 | 9 | 2.34E-08 | 0.669 | 75 | 1      |                                |                       |
| DMR9:40522101  | 9  | 40522101  | 2700 | 5 | 1.30E-10 | 0.664 | 28 | 1.037  |                                |                       |
| DMR9:42428501  | 9  | 42428501  | 1200 | 1 | 7.48E-07 | 3.184 | 5  | 0.4167 |                                |                       |
| DMR9:43979301  | 9  | 43979301  | 900  | 1 | 5.12E-09 | 0.299 | 16 | 1.7778 | Inpp4a                         |                       |
| DMR9:44068901  | 9  | 44068901  | 500  | 1 | 4.18E-07 | 6.816 | 11 | 2.2    | Mgat4a                         | Golgi                 |
| DMR9:45398701  | 9  | 45398701  | 300  | 1 | 2.45E-13 | 0.567 | 0  | 0      |                                |                       |
| DMR9:49736101  | 9  | 49736101  | 300  | 1 | 4.35E-08 | 0.337 | 2  | 0.6667 |                                |                       |
| DMR9:53968601  | 9  | 53968601  | 2800 | 1 | 3.06E-07 | 3.868 | 12 | 0.4286 |                                |                       |
| DMR9:55375201  | 9  | 55375201  | 700  | 3 | 2.91E-07 | 0.49  | 17 | 2.4286 | Tmeff2                         | Signaling             |
| DMR9:65236501  | 9  | 65236501  | 200  | 1 | 4.10E-08 | 0.447 | 3  | 1.5    | Aox2                           |                       |
| DMR9:74198001  | 9  | 74198001  | 400  | 1 | 1.01E-07 | 0.512 | 4  | 1      | Cps1                           | Unknown               |
| DMR9:80178301  | 9  | 80178301  | 600  | 3 | 1.02E-12 | 0.594 | 3  | 0.5    |                                |                       |
| DMR9:82134901  | 9  | 82134901  | 300  | 1 | 7.52E-07 | 0.424 | 1  | 0.3333 | Fev                            | Signaling             |
| DMR9:86972201  | 9  | 86972201  | 300  | 1 | 1.50E-07 | 0.471 | 4  | 1.3333 | NEWGENE_1305560                |                       |
| DMR9:95455901  | 9  | 95455901  | 400  | 1 | 3.05E-07 | 0.439 | 3  | 0.75   | Trpm8                          | Receptor              |
| DMR9:97589501  | 9  | 97589501  | 500  | 1 | 2.18E-07 | 0.514 | 2  | 0.4    |                                |                       |
| DMR9:97787401  | 9  | 97787401  | 300  | 1 | 2.54E-07 | 0.314 | 5  | 1.6667 | Rn50_9_0975.2;Cops8            | Signaling             |
| DMR9:104571001 | 9  | 104571001 | 700  | 1 | 9.70E-08 | 5.533 | 20 | 2.8571 | AABR07068420.1                 |                       |
| DMR9:105054901 | 9  | 105054901 | 1400 | 1 | 4.11E-08 | 0.558 | 28 | 2      |                                |                       |
| DMR9:110200701 | 9  | 110200701 | 400  | 1 | 3.78E-10 | 0.615 | 2  | 0.5    | Efna5                          | Signaling             |
| DMR9:111277601 | 9  | 111277601 | 200  | 1 | 4.92E-07 | 0.198 | 6  | 3      | Ppip5k2                        |                       |
| DMR9:115250801 | 9  | 115250801 | 400  | 1 | 3.84E-08 | 0.231 | 1  | 0.25   | Ptpm                           | Receptor              |
| DMR9:115402201 | 9  | 115402201 | 1200 | 1 | 6.64E-07 | 0.449 | 9  | 0.75   | Ptpm                           | Receptor              |
| DMR9:116855101 | 9  | 116855101 | 1500 | 1 | 4.61E-07 | 0.531 | 11 | 0.7333 | L3mbtl4                        | Epigenetic            |
| DMR9:118545601 | 9  | 118545601 | 500  | 1 | 7.53E-07 | 0.568 | 2  | 0.4    |                                |                       |
| DMR9:119160101 | 9  | 119160101 | 1400 | 1 | 8.71E-07 | 0.556 | 15 | 1.0714 | Dlgap1                         | Signaling             |
| DMR10:5412401  | 10 | 5412401   | 300  | 1 | 1.42E-09 | 0.452 | 0  | 0      |                                |                       |
| DMR10:7144301  | 10 | 7144301   | 400  | 2 | 1.40E-09 | 0.555 | 3  | 0.75   | Abat                           | Metabolism            |
| DMR10:7546501  | 10 | 7546501   | 400  | 1 | 8.38E-09 | 0.582 | 0  | 0      |                                |                       |
| DMR10:8000501  | 10 | 8000501   | 1000 | 2 | 5.53E-07 | 0.559 | 5  | 0.5    |                                |                       |
| DMR10:8017301  | 10 | 8017301   | 400  | 2 | 1.84E-08 | 0.518 | 1  | 0.25   |                                |                       |
| DMR10:10140301 | 10 | 10140301  | 400  | 1 | 4.97E-07 | 0.574 | 1  | 0.25   |                                |                       |
| DMR10:10228901 | 10 | 10228901  | 1100 | 1 | 3.21E-08 | 0.607 | 8  | 0.7273 |                                |                       |
| DMR10:16136901 | 10 | 16136901  | 1200 | 1 | 5.51E-07 | 0.422 | 9  | 0.75   |                                |                       |
| DMR10:16390201 | 10 | 16390201  | 600  | 1 | 5.45E-07 | 0.491 | 3  | 0.5    |                                |                       |
| DMR10:17568501 | 10 | 17568501  | 300  | 1 | 6.20E-07 | 0.244 | 3  | 1      | Fbxw11                         | Metabolism            |
| DMR10:19306601 | 10 | 19306601  | 800  | 1 | 2.80E-07 | 0.303 | 2  | 0.25   |                                |                       |
| DMR10:20125801 | 10 | 20125801  | 400  | 1 | 3.95E-08 | 0.489 | 2  | 0.5    |                                |                       |
| DMR10:22353301 | 10 | 22353301  | 200  | 1 | 4.03E-08 | 0.386 | 2  | 1      |                                |                       |
| DMR10:23129501 | 10 | 23129501  | 400  | 1 | 5.55E-08 | 0.559 | 0  | 0      |                                |                       |

|                 |    |           |      |   |          |       |    |        |                              |                                     |
|-----------------|----|-----------|------|---|----------|-------|----|--------|------------------------------|-------------------------------------|
| DMR10:33241201  | 10 | 33241201  | 200  | 1 | 8.30E-07 | 0.465 | 2  | 1      |                              |                                     |
| DMR10:38152301  | 10 | 38152301  | 1700 | 1 | 4.32E-08 | 0.512 | 47 | 2.7647 | Fstl4                        | Hormone                             |
| DMR10:40514101  | 10 | 40514101  | 400  | 1 | 1.59E-08 | 0.497 | 0  | 0      | Slc36a2                      |                                     |
| DMR10:48893401  | 10 | 48893401  | 1000 | 1 | 7.56E-07 | 0.232 | 16 | 1.6    | AABR07029741.1;SNORA29;Trpv2 | Transport                           |
| DMR10:52961401  | 10 | 52961401  | 1800 | 3 | 3.19E-07 | 0.583 | 7  | 0.3889 | Shisa6                       | Development                         |
| DMR10:53811701  | 10 | 53811701  | 600  | 1 | 4.27E-08 | 0.431 | 5  | 0.8333 | Myh2;Myh8                    | Cytoskeleton                        |
| DMR10:58038301  | 10 | 58038301  | 600  | 1 | 2.84E-10 | 0.518 | 1  | 0.1667 |                              |                                     |
| DMR10:62336301  | 10 | 62336301  | 300  | 1 | 4.60E-07 | 4.912 | 4  | 1.3333 |                              |                                     |
| DMR10:63672201  | 10 | 63672201  | 300  | 1 | 2.03E-10 | 0.173 | 13 | 4.3333 | Scarf1;Slc43a2               | Receptor;Metabolism                 |
| DMR10:64008401  | 10 | 64008401  | 600  | 3 | 6.30E-13 | 0.636 | 0  | 0      | Rph3a1                       | Transport                           |
| DMR10:67798801  | 10 | 67798801  | 300  | 1 | 8.33E-07 | 0.642 | 0  | 0      |                              |                                     |
| DMR10:67947301  | 10 | 67947301  | 300  | 1 | 2.70E-08 | 0.532 | 1  | 0.3333 | Myo1d                        | Cytoskeleton                        |
| DMR10:68286101  | 10 | 68286101  | 500  | 2 | 4.07E-10 | 0.587 | 1  | 0.2    | Asic2                        | Transport                           |
| DMR10:68700201  | 10 | 68700201  | 300  | 1 | 1.84E-07 | 0.379 | 0  | 0      |                              |                                     |
| DMR10:69553801  | 10 | 69553801  | 500  | 1 | 1.69E-07 | 0.515 | 3  | 0.6    |                              |                                     |
| DMR10:69816001  | 10 | 69816001  | 900  | 1 | 4.96E-07 | 0.42  | 7  | 0.7778 |                              |                                     |
| DMR10:76771401  | 10 | 76771401  | 500  | 1 | 8.69E-07 | 3.424 | 12 | 2.4    |                              |                                     |
| DMR10:77016901  | 10 | 77016901  | 400  | 1 | 1.24E-07 | 0.392 | 5  | 1.25   |                              |                                     |
| DMR10:77074701  | 10 | 77074701  | 500  | 1 | 7.17E-10 | 0.501 | 0  | 0      | AABR07030235.1               |                                     |
| DMR10:78836301  | 10 | 78836301  | 600  | 3 | 2.11E-07 | 2.184 | 4  | 0.6667 |                              |                                     |
| DMR10:82168401  | 10 | 82168401  | 500  | 1 | 1.55E-08 | 0.387 | 1  | 0.2    | Cacna1g                      | Transport                           |
| DMR10:82264401  | 10 | 82264401  | 300  | 2 | 9.92E-11 | 0.411 | 2  | 0.6667 |                              |                                     |
| DMR10:82720001  | 10 | 82720001  | 1000 | 2 | 3.85E-09 | 0.476 | 8  | 0.8    |                              |                                     |
| DMR10:83966701  | 10 | 83966701  | 800  | 2 | 1.73E-07 | 0.56  | 2  | 0.25   | Ttl6                         | Cytoskeleton                        |
| DMR10:85995101  | 10 | 85995101  | 400  | 1 | 1.41E-07 | 0.551 | 2  | 0.5    | Stac2                        | Signaling                           |
| DMR10:86617501  | 10 | 86617501  | 400  | 1 | 1.97E-07 | 0.433 | 0  | 0      | Psmd3;Csf3;Med24;SNORD124    | Proteolysis;Signaling;Transcription |
| DMR10:89143001  | 10 | 89143001  | 300  | 2 | 7.45E-08 | 0.325 | 1  | 0.3333 |                              |                                     |
| DMR10:92072101  | 10 | 92072101  | 1200 | 1 | 1.89E-07 | 0.539 | 4  | 0.3333 |                              |                                     |
| DMR10:92520401  | 10 | 92520401  | 400  | 1 | 4.30E-07 | 4.078 | 1  | 0.25   |                              |                                     |
| DMR10:96475201  | 10 | 96475201  | 300  | 1 | 4.26E-07 | 0.332 | 5  | 1.6667 | Prkca                        | Binding Protein                     |
| DMR10:97771501  | 10 | 97771501  | 500  | 2 | 5.85E-09 | 0.544 | 1  | 0.2    | Arsg                         | Metabolism                          |
| DMR10:97798001  | 10 | 97798001  | 800  | 1 | 2.44E-07 | 0.545 | 2  | 0.25   | Arsg                         | Metabolism                          |
| DMR10:98218701  | 10 | 98218701  | 700  | 3 | 1.29E-11 | 0.377 | 0  | 0      |                              |                                     |
| DMR10:98912401  | 10 | 98912401  | 300  | 1 | 1.32E-07 | 0.335 | 6  | 2      |                              |                                     |
| DMR10:100670901 | 10 | 100670901 | 400  | 1 | 4.10E-07 | 0.373 | 0  | 0      |                              |                                     |
| DMR10:101065101 | 10 | 101065101 | 500  | 2 | 4.67E-09 | 0.435 | 2  | 0.4    |                              |                                     |
| DMR10:101774201 | 10 | 101774201 | 1800 | 1 | 1.10E-07 | 0.474 | 31 | 1.7222 | Slc39a11                     | Metabolism                          |
| DMR10:102287801 | 10 | 102287801 | 200  | 1 | 3.91E-08 | 0.609 | 0  | 0      | AABR07030729.1               |                                     |
| DMR10:107047101 | 10 | 107047101 | 1400 | 2 | 1.61E-13 | 0.503 | 30 | 2.1429 | Dnah17                       | Cytoskeleton                        |
| DMR10:107108001 | 10 | 107108001 | 800  | 1 | 2.34E-07 | 0.517 | 3  | 0.375  | Dnah17                       | Cytoskeleton                        |
| DMR10:107521701 | 10 | 107521701 | 500  | 1 | 2.56E-07 | 0.661 | 2  | 0.4    | Engase;Rbfox3                | Metabolism                          |
| DMR10:107846401 | 10 | 107846401 | 400  | 1 | 3.55E-08 | 0.446 | 1  | 0.25   |                              |                                     |
| DMR10:109393901 | 10 | 109393901 | 300  | 1 | 1.35E-07 | 0.282 | 4  | 1.3333 |                              |                                     |
| DMR10:110679501 | 10 | 110679501 | 1600 | 2 | 5.03E-11 | 0.621 | 13 | 0.8125 | Tbcd                         | EST                                 |
| DMR11:9512101   | 11 | 9512101   | 300  | 1 | 8.36E-08 | 0.557 | 0  | 0      |                              |                                     |
| DMR11:14683501  | 11 | 14683501  | 500  | 1 | 3.58E-10 | 0.53  | 3  | 0.6    | Nrip1                        | Transcription                       |
| DMR11:17160601  | 11 | 17160601  | 300  | 1 | 9.53E-08 | 0.253 | 3  | 1      |                              |                                     |
| DMR11:24337701  | 11 | 24337701  | 1200 | 1 | 2.94E-07 | 0.567 | 3  | 0.25   |                              |                                     |
| DMR11:25708901  | 11 | 25708901  | 400  | 2 | 5.98E-10 | 0.572 | 1  | 0.25   |                              |                                     |
| DMR11:28759301  | 11 | 28759301  | 300  | 1 | 1.44E-07 | 0.278 | 2  | 0.6667 |                              |                                     |
| DMR11:29918901  | 11 | 29918901  | 1800 | 1 | 1.87E-09 | 0.571 | 24 | 1.3333 |                              |                                     |
| DMR11:30725801  | 11 | 30725801  | 3000 | 1 | 7.67E-07 | 0.623 | 15 | 0.5    |                              |                                     |
| DMR11:31010701  | 11 | 31010701  | 1900 | 2 | 3.04E-08 | 0.66  | 26 | 1.3684 | Eva1c                        | Unknown                             |
| DMR11:31463601  | 11 | 31463601  | 300  | 1 | 1.51E-08 | 0.499 | 0  | 0      |                              |                                     |
| DMR11:32361601  | 11 | 32361601  | 700  | 1 | 6.90E-08 | 0.147 | 3  | 0.4286 |                              |                                     |
| DMR11:34075801  | 11 | 34075801  | 400  | 1 | 9.80E-09 | 0.404 | 3  | 0.75   | Morc3                        | Transcription                       |
| DMR11:35060701  | 11 | 35060701  | 500  | 2 | 6.62E-09 | 0.38  | 0  | 0      | Kcnj6                        | Metabolism                          |

|                |    |          |      |   |          |       |    |        |                               |                      |
|----------------|----|----------|------|---|----------|-------|----|--------|-------------------------------|----------------------|
| DMR11:35626801 | 11 | 35626801 | 400  | 1 | 4.41E-07 | 0.611 | 5  | 1.25   | AABR07033697.2                |                      |
| DMR11:36176401 | 11 | 36176401 | 600  | 1 | 9.09E-09 | 0.534 | 1  | 0.1667 |                               |                      |
| DMR11:37416501 | 11 | 37416501 | 500  | 1 | 4.74E-07 | 5.184 | 3  | 0.6    |                               |                      |
| DMR11:39099701 | 11 | 39099701 | 1300 | 1 | 5.25E-07 | 2.149 | 10 | 0.7692 |                               |                      |
| DMR11:42175701 | 11 | 42175701 | 500  | 1 | 8.30E-07 | 0.461 | 0  | 0      |                               |                      |
| DMR11:46509101 | 11 | 46509101 | 600  | 1 | 1.43E-09 | 0.386 | 2  | 0.3333 |                               |                      |
| DMR11:58659301 | 11 | 58659301 | 1200 | 1 | 1.05E-09 | 0.462 | 12 | 1      | Gap43;AABR07034249.1          |                      |
| DMR11:59539001 | 11 | 59539001 | 500  | 2 | 1.23E-07 | 0.462 | 0  | 0      |                               |                      |
| DMR11:64326201 | 11 | 64326201 | 1800 | 3 | 1.62E-07 | 0.488 | 5  | 0.2778 | Igsf11                        | Extracellular Matrix |
| DMR11:64970101 | 11 | 64970101 | 500  | 1 | 2.08E-09 | 0.479 | 3  | 0.6    | Cox17;Maats1                  | Binding Protein      |
| DMR11:65684601 | 11 | 65684601 | 600  | 1 | 6.75E-07 | 0.483 | 0  | 0      |                               |                      |
| DMR11:66627601 | 11 | 66627601 | 800  | 1 | 6.21E-07 | 0.535 | 5  | 0.625  | Polq                          | Transcription        |
| DMR11:68367401 | 11 | 68367401 | 200  | 1 | 3.12E-09 | 0.491 | 0  | 0      |                               |                      |
| DMR11:70194801 | 11 | 70194801 | 800  | 1 | 3.31E-07 | 0.58  | 5  | 0.625  | Muc13                         |                      |
| DMR11:71225601 | 11 | 71225601 | 1100 | 1 | 3.84E-08 | 0.514 | 11 | 1      | LOC100910650;Muc20            |                      |
| DMR11:74231601 | 11 | 74231601 | 500  | 1 | 1.49E-08 | 0.524 | 5  | 1      | AABR07034502.1                |                      |
| DMR11:78590801 | 11 | 78590801 | 900  | 1 | 1.60E-11 | 0.336 | 5  | 0.5556 |                               |                      |
| DMR11:78723501 | 11 | 78723501 | 700  | 1 | 6.74E-07 | 0.434 | 0  | 0      | Tprg1                         | Unknown              |
| DMR11:82688001 | 11 | 82688001 | 400  | 2 | 2.38E-12 | 0.546 | 3  | 0.75   | Liph                          |                      |
| DMR11:86949001 | 11 | 86949001 | 200  | 1 | 8.78E-09 | 0.588 | 0  | 0      |                               |                      |
| DMR11:88400001 | 11 | 88400001 | 500  | 2 | 3.62E-07 | 0.701 | 0  | 0      | Igll1;SNORA17                 | Immune               |
| DMR11:88744901 | 11 | 88744901 | 600  | 3 | 6.17E-09 | 0.606 | 2  | 0.3333 | Fgd4                          | Signaling            |
| DMR11:90459201 | 11 | 90459201 | 400  | 2 | 1.49E-11 | 0.503 | 0  | 0      |                               |                      |
| DMR12:157501   | 12 | 157501   | 300  | 1 | 2.01E-07 | 0.477 | 3  | 1      |                               |                      |
| DMR12:1341101  | 12 | 1341101  | 400  | 1 | 5.32E-07 | 0.529 | 2  | 0.5    |                               |                      |
| DMR12:1699101  | 12 | 1699101  | 1300 | 1 | 5.39E-07 | 0.455 | 6  | 0.4615 | Insr                          | Receptor             |
| DMR12:1877201  | 12 | 1877201  | 1100 | 1 | 3.34E-07 | 0.547 | 11 | 1      |                               |                      |
| DMR12:2250601  | 12 | 2250601  | 800  | 1 | 1.09E-07 | 0.519 | 12 | 1.5    | Fcer2                         | Immune               |
| DMR12:5653001  | 12 | 5653001  | 1100 | 1 | 1.79E-09 | 0.401 | 20 | 1.8182 | Fry                           | Development          |
| DMR12:6944301  | 12 | 6944301  | 300  | 1 | 5.75E-07 | 0.552 | 4  | 1.3333 | Uspl1                         |                      |
| DMR12:7352701  | 12 | 7352701  | 1000 | 1 | 7.39E-08 | 0.482 | 2  | 0.2    | Metazoa_SRP;AABR07035224.1    |                      |
| DMR12:8137201  | 12 | 8137201  | 200  | 1 | 9.70E-08 | 0.212 | 2  | 1      | Mtus2                         | Cytoskeleton         |
| DMR12:8417601  | 12 | 8417601  | 1600 | 1 | 1.10E-08 | 0.277 | 41 | 2.5625 | Mtus2                         | Cytoskeleton         |
| DMR12:8432501  | 12 | 8432501  | 2000 | 2 | 4.50E-10 | 0.357 | 39 | 1.95   |                               |                      |
| DMR12:9408501  | 12 | 9408501  | 400  | 2 | 1.19E-11 | 0.591 | 0  | 0      | Flt3                          | Receptor             |
| DMR12:10112001 | 12 | 10112001 | 400  | 3 | 1.01E-11 | 0.442 | 1  | 0.25   |                               |                      |
| DMR12:11273601 | 12 | 11273601 | 300  | 2 | 1.36E-11 | 0.306 | 5  | 1.6667 | Arpc1b;Arpc1a                 | Cytoskeleton         |
| DMR12:11363201 | 12 | 11363201 | 1000 | 1 | 3.38E-07 | 0.565 | 5  | 0.5    | Kpna7;AABR07035368.1          | Unknown              |
| DMR12:12039301 | 12 | 12039301 | 600  | 1 | 4.03E-08 | 3.094 | 26 | 4.3333 |                               |                      |
| DMR12:12600801 | 12 | 12600801 | 1500 | 2 | 4.73E-12 | 3.677 | 16 | 1.0667 |                               |                      |
| DMR12:14024101 | 12 | 14024101 | 700  | 1 | 3.54E-07 | 0.607 | 6  | 0.8571 | Mmd2                          | Development          |
| DMR12:15630901 | 12 | 15630901 | 2000 | 1 | 6.80E-07 | 0.553 | 3  | 0.15   |                               |                      |
| DMR12:15954001 | 12 | 15954001 | 1700 | 1 | 1.82E-09 | 0.422 | 12 | 0.7059 | lqce;Gna12                    | Signaling            |
| DMR12:16877601 | 12 | 16877601 | 400  | 1 | 8.10E-08 | 0.549 | 2  | 0.5    |                               |                      |
| DMR12:17125301 | 12 | 17125301 | 300  | 1 | 4.38E-07 | 0.521 | 6  | 2      |                               |                      |
| DMR12:17441901 | 12 | 17441901 | 700  | 1 | 5.25E-07 | 0.476 | 7  | 1      | Adap1                         | Transcription        |
| DMR12:17877401 | 12 | 17877401 | 300  | 2 | 3.00E-09 | 0.269 | 0  | 0      | LOC498155                     |                      |
| DMR12:20665401 | 12 | 20665401 | 700  | 1 | 1.14E-08 | 3.537 | 5  | 0.7143 | RGD1561730;RGD1560281         | Immune               |
| DMR12:20815301 | 12 | 20815301 | 200  | 1 | 4.69E-07 | 5.006 | 1  | 0.5    | AABR07035650.2;AABR07035650.1 |                      |
| DMR12:22523501 | 12 | 22523501 | 200  | 1 | 5.46E-08 | 0.333 | 1  | 0.5    | AABR07035790.1;AABR07035790.2 |                      |
| DMR12:22541701 | 12 | 22541701 | 1100 | 1 | 1.32E-10 | 0.097 | 25 | 2.2727 | AABR07035791.1                |                      |
| DMR12:24224901 | 12 | 24224901 | 200  | 1 | 6.16E-07 | 0.285 | 0  | 0      | Hip1                          | Cytoskeleton         |
| DMR12:27466001 | 12 | 27466001 | 1600 | 1 | 1.16E-11 | 0.507 | 15 | 0.9375 | AABR07035916.1                |                      |
| DMR12:28760101 | 12 | 28760101 | 600  | 1 | 7.78E-08 | 0.563 | 2  | 0.3333 | Wbscr17                       | Development          |
| DMR12:29452301 | 12 | 29452301 | 1000 | 1 | 5.73E-07 | 0.535 | 11 | 1.1    | Caln1                         | Signaling            |

|                |    |          |      |   |          |        |    |        |                     |                            |
|----------------|----|----------|------|---|----------|--------|----|--------|---------------------|----------------------------|
| DMR12:34429501 | 12 | 34429501 | 400  | 1 | 7.03E-08 | 0.444  | 1  | 0.25   |                     |                            |
| DMR12:36277701 | 12 | 36277701 | 1300 | 2 | 3.74E-08 | 0.538  | 0  | 0      | Tmem132b            | Unknown                    |
| DMR12:36480001 | 12 | 36480001 | 900  | 2 | 3.27E-09 | 0.542  | 5  | 0.5556 |                     |                            |
| DMR12:39959401 | 12 | 39959401 | 500  | 2 | 2.31E-09 | 0.504  | 4  | 0.8    | Ccdc63;Myl2         | Cytoskeleton               |
| DMR12:40970701 | 12 | 40970701 | 800  | 1 | 5.73E-08 | 0.27   | 20 | 2.5    | AABR07036376.1      |                            |
| DMR12:42002001 | 12 | 42002001 | 300  | 1 | 1.63E-07 | 0.388  | 1  | 0.3333 | Rbm19               | Transcription              |
| DMR12:42415101 | 12 | 42415101 | 500  | 1 | 6.35E-08 | 0.414  | 4  | 0.8    |                     |                            |
| DMR12:42940401 | 12 | 42940401 | 300  | 1 | 1.01E-07 | 0.524  | 0  | 0      |                     |                            |
| DMR12:43229001 | 12 | 43229001 | 500  | 1 | 1.17E-08 | 0.481  | 4  | 0.8    | AABR07036435.1      |                            |
| DMR12:44161101 | 12 | 44161101 | 400  | 1 | 7.66E-08 | 0.454  | 5  | 1.25   | Tesc                | Signaling                  |
| DMR12:45639001 | 12 | 45639001 | 600  | 2 | 1.52E-14 | 4.049  | 5  | 0.8333 |                     |                            |
| DMR12:45946401 | 12 | 45946401 | 2600 | 1 | 3.43E-07 | 0.397  | 37 | 1.4231 | AABR07036514.1      |                            |
| DMR12:46240101 | 12 | 46240101 | 3200 | 1 | 4.06E-07 | 6.077  | 40 | 1.25   | 7SK                 |                            |
| DMR12:47397101 | 12 | 47397101 | 600  | 1 | 4.59E-07 | 0.61   | 5  | 0.8333 |                     |                            |
| DMR12:48790501 | 12 | 48790501 | 1600 | 1 | 6.88E-07 | 0.506  | 59 | 3.6875 | Cmklr1              | Growth Factors & Cytokines |
| DMR12:48864001 | 12 | 48864001 | 400  | 1 | 8.28E-07 | 4.615  | 5  | 1.25   | Wscd2               |                            |
| DMR12:49766901 | 12 | 49766901 | 1300 | 1 | 4.51E-09 | 0.207  | 7  | 0.5385 | Myo18b              | Cytoskeleton               |
| DMR12:49870001 | 12 | 49870001 | 1600 | 1 | 2.38E-07 | 0.495  | 21 | 1.3125 | Myo18b              | Cytoskeleton               |
| DMR12:50065601 | 12 | 50065601 | 500  | 2 | 1.51E-09 | 0.438  | 2  | 0.4    |                     |                            |
| DMR12:50526801 | 12 | 50526801 | 1900 | 4 | 2.49E-13 | 2.224  | 24 | 1.2632 |                     |                            |
| DMR12:50627401 | 12 | 50627401 | 600  | 1 | 8.32E-08 | 0.431  | 1  | 0.1667 | AABR07036626.1      |                            |
| DMR12:50776201 | 12 | 50776201 | 2100 | 3 | 2.28E-12 | 3.01   | 58 | 2.7619 |                     |                            |
| DMR12:50992201 | 12 | 50992201 | 800  | 1 | 2.59E-09 | 0.633  | 4  | 0.5    |                     |                            |
| DMR12:51123401 | 12 | 51123401 | 300  | 1 | 5.51E-07 | 0.508  | 0  | 0      |                     |                            |
| DMR12:51200101 | 12 | 51200101 | 600  | 1 | 1.23E-07 | 0.593  | 3  | 0.5    |                     |                            |
| DMR12:51465701 | 12 | 51465701 | 300  | 2 | 3.20E-08 | 0.496  | 1  | 0.3333 | Ttc28               | Unknown                    |
| DMR12:52220001 | 12 | 52220001 | 400  | 1 | 8.05E-08 | 0.436  | 0  | 0      | 5S_rRNA             |                            |
| DMR13:10360801 | 13 | 10360801 | 200  | 1 | 2.10E-07 | 0.604  | 0  | 0      |                     |                            |
| DMR13:14487601 | 13 | 14487601 | 400  | 1 | 2.71E-07 | 0.476  | 4  | 1      | LOC304725           |                            |
| DMR13:17222301 | 13 | 17222301 | 300  | 1 | 3.28E-07 | 0.424  | 0  | 0      |                     |                            |
| DMR13:19426801 | 13 | 19426801 | 100  | 1 | 1.61E-08 | 28.478 | 0  | 0      |                     |                            |
| DMR13:19632601 | 13 | 19632601 | 2000 | 2 | 2.23E-07 | 2.597  | 14 | 0.7    |                     |                            |
| DMR13:19643201 | 13 | 19643201 | 500  | 1 | 4.79E-07 | 3.626  | 7  | 1.4    |                     |                            |
| DMR13:19657901 | 13 | 19657901 | 3800 | 1 | 1.81E-08 | 2.29   | 44 | 1.1579 |                     |                            |
| DMR13:19740801 | 13 | 19740801 | 900  | 1 | 4.19E-07 | 13.814 | 3  | 0.3333 |                     |                            |
| DMR13:26753401 | 13 | 26753401 | 300  | 1 | 3.12E-08 | 0.12   | 0  | 0      | Bcl2                | Signaling                  |
| DMR13:27069901 | 13 | 27069901 | 500  | 1 | 7.48E-07 | 0.538  | 1  | 0.2    | Serpib13            | Protease                   |
| DMR13:27234001 | 13 | 27234001 | 400  | 1 | 3.32E-07 | 0.471  | 0  | 0      | Serpib11            | Signaling                  |
| DMR13:30576801 | 13 | 30576801 | 2800 | 1 | 8.02E-07 | 2.836  | 26 | 0.9286 |                     |                            |
| DMR13:34021401 | 13 | 34021401 | 300  | 1 | 1.69E-07 | 0.593  | 2  | 0.6667 |                     |                            |
| DMR13:34876701 | 13 | 34876701 | 400  | 3 | 2.09E-08 | 0.358  | 2  | 0.5    | Gli2                | Transcription              |
| DMR13:35179301 | 13 | 35179301 | 1800 | 1 | 8.78E-09 | 0.359  | 20 | 1.1111 |                     |                            |
| DMR13:36636901 | 13 | 36636901 | 600  | 1 | 8.04E-08 | 0.54   | 5  | 0.8333 |                     |                            |
| DMR13:41770101 | 13 | 41770101 | 300  | 1 | 2.38E-07 | 0.487  | 0  | 0      |                     |                            |
| DMR13:43068801 | 13 | 43068801 | 700  | 1 | 2.87E-07 | 0.507  | 2  | 0.2857 |                     |                            |
| DMR13:47518801 | 13 | 47518801 | 100  | 1 | 9.64E-09 | 0.098  | 0  | 0      |                     |                            |
| DMR13:48230401 | 13 | 48230401 | 200  | 1 | 4.06E-07 | 0.194  | 0  | 0      | Srgap2              | Signaling                  |
| DMR13:48911701 | 13 | 48911701 | 2500 | 4 | 8.67E-12 | 0.597  | 30 | 1.2    | Cdk18               | Cell Cycle                 |
| DMR13:49651301 | 13 | 49651301 | 400  | 1 | 3.25E-07 | 0.438  | 4  | 1      | Lrrn2               | Development                |
| DMR13:51661101 | 13 | 51661101 | 700  | 3 | 2.12E-09 | 0.415  | 3  | 0.4286 | Ppp1r12b            | Signaling                  |
| DMR13:51672001 | 13 | 51672001 | 600  | 1 | 2.34E-08 | 0.489  | 3  | 0.5    | Ppp1r12b            | Signaling                  |
| DMR13:52182701 | 13 | 52182701 | 500  | 1 | 7.26E-10 | 0.473  | 3  | 0.6    | Lmod1               | Cytoskeleton               |
| DMR13:68568401 | 13 | 68568401 | 400  | 1 | 6.95E-09 | 0.469  | 4  | 1      |                     |                            |
| DMR13:70467901 | 13 | 70467901 | 600  | 3 | 1.28E-10 | 0.575  | 1  | 0.1667 | Nmnat2              | Metabolism                 |
| DMR13:70572701 | 13 | 70572701 | 1600 | 3 | 3.14E-15 | 0.239  | 20 | 1.25   | Lamc2               | Cytoskeleton               |
| DMR13:70819101 | 13 | 70819101 | 800  | 1 | 6.30E-07 | 0.453  | 9  | 1.125  |                     |                            |
| DMR13:71136201 | 13 | 71136201 | 300  | 1 | 1.38E-09 | 0.492  | 5  | 1.6667 | Rgs8;AABR07021419.1 | Signaling                  |
| DMR13:73174501 | 13 | 73174501 | 1000 | 1 | 7.38E-07 | 0.262  | 28 | 2.8    | Rn60_13_0732.1      |                            |

|                 |    |           |       |   |          |        |      |         |                                                                                                                 |                      |
|-----------------|----|-----------|-------|---|----------|--------|------|---------|-----------------------------------------------------------------------------------------------------------------|----------------------|
| DMR13:73402801  | 13 | 73402801  | 1200  | 1 | 2.58E-09 | 0.64   | 13   | 1.0833  | Lhx4                                                                                                            | Transcription        |
| DMR13:73810501  | 13 | 73810501  | 1400  | 3 | 1.22E-09 | 0.581  | 14   | 1       | Fam163a                                                                                                         |                      |
| DMR13:75282001  | 13 | 75282001  | 800   | 1 | 4.04E-07 | 0.371  | 6    | 0.75    |                                                                                                                 |                      |
| DMR13:75608801  | 13 | 75608801  | 200   | 1 | 9.50E-07 | 0.363  | 0    | 0       |                                                                                                                 |                      |
| DMR13:79183801  | 13 | 79183801  | 400   | 1 | 3.90E-08 | 0.599  | 0    | 0       |                                                                                                                 |                      |
| DMR13:80392701  | 13 | 80392701  | 3200  | 1 | 9.35E-07 | 0.693  | 34   | 1.0625  | Rn50_13_0853.1                                                                                                  |                      |
| DMR13:80569301  | 13 | 80569301  | 500   | 1 | 6.21E-07 | 0.529  | 9    | 1.8     |                                                                                                                 |                      |
| DMR13:80581901  | 13 | 80581901  | 300   | 1 | 3.84E-08 | 0.604  | 6    | 2       |                                                                                                                 |                      |
| DMR13:81548701  | 13 | 81548701  | 600   | 1 | 9.11E-08 | 0.606  | 7    | 1.1667  |                                                                                                                 |                      |
| DMR13:83505601  | 13 | 83505601  | 200   | 1 | 4.76E-07 | 0.534  | 0    | 0       | Tiprl                                                                                                           |                      |
| DMR13:83566201  | 13 | 83566201  | 1200  | 2 | 8.26E-08 | 0.6    | 7    | 0.5833  | Gpr161                                                                                                          | Receptor             |
| DMR13:89441701  | 13 | 89441701  | 6900  | 3 | 3.00E-10 | 0.62   | 213  | 3.087   | Fcgr2b                                                                                                          | Immune               |
| DMR13:89986301  | 13 | 89986301  | 2000  | 2 | 4.68E-07 | 0.6    | 41   | 2.05    | Cd244                                                                                                           | Receptor             |
| DMR13:91205301  | 13 | 91205301  | 3500  | 2 | 1.45E-11 | 0.616  | 92   | 2.6286  | LOC100911825;LOC108348047                                                                                       | Receptor             |
| DMR13:91520001  | 13 | 91520001  | 200   | 1 | 9.29E-07 | 0.313  | 2    | 1       | AABR07021799.1                                                                                                  |                      |
| DMR13:104082401 | 13 | 104082401 | 300   | 1 | 2.26E-08 | 0.525  | 6    | 2       | Lyplal1;U7                                                                                                      | Metabolism           |
| DMR13:104304701 | 13 | 104304701 | 200   | 2 | 1.71E-08 | 0.546  | 0    | 0       | Dusp10                                                                                                          | Signaling            |
| DMR13:104504901 | 13 | 104504901 | 400   | 2 | 1.59E-14 | 0.505  | 6    | 1.5     |                                                                                                                 |                      |
| DMR13:104867201 | 13 | 104867201 | 400   | 2 | 9.67E-09 | 0.408  | 1    | 0.25    |                                                                                                                 |                      |
| DMR13:105434601 | 13 | 105434601 | 1700  | 1 | 4.94E-08 | 0.699  | 18   | 1.0588  |                                                                                                                 |                      |
| DMR13:106427201 | 13 | 106427201 | 1400  | 1 | 1.38E-09 | 0.49   | 12   | 0.8571  |                                                                                                                 |                      |
| DMR13:106789401 | 13 | 106789401 | 500   | 2 | 7.29E-08 | 0.692  | 11   | 2.2     | Ush2a                                                                                                           | Extracellular Matrix |
| DMR13:107950601 | 13 | 107950601 | 500   | 1 | 5.97E-07 | 0.571  | 2    | 0.4     |                                                                                                                 |                      |
| DMR13:110121301 | 13 | 110121301 | 200   | 2 | 1.78E-08 | 0.488  | 0    | 0       |                                                                                                                 |                      |
| DMR13:113096501 | 13 | 113096501 | 2200  | 1 | 3.64E-07 | 6.864  | 12   | 0.5455  |                                                                                                                 |                      |
| DMR14:5203701   | 14 | 5203701   | 300   | 1 | 1.34E-07 | 0.412  | 0    | 0       |                                                                                                                 |                      |
| DMR14:6684601   | 14 | 6684601   | 1300  | 1 | 4.19E-07 | 4.349  | 7    | 0.5385  | Spp1                                                                                                            | Signaling            |
| DMR14:6811301   | 14 | 6811301   | 1900  | 1 | 9.50E-08 | 0.322  | 14   | 0.7368  | lbsp                                                                                                            | Signaling            |
| DMR14:7738801   | 14 | 7738801   | 300   | 1 | 4.54E-07 | 0.393  | 14   | 4.6667  | Ptpn13                                                                                                          | Signaling            |
| DMR14:11033201  | 14 | 11033201  | 500   | 1 | 2.36E-09 | 0.469  | 10   | 2       |                                                                                                                 |                      |
| DMR14:11077301  | 14 | 11077301  | 400   | 1 | 5.38E-07 | 0.414  | 12   | 3       |                                                                                                                 |                      |
| DMR14:11096601  | 14 | 11096601  | 200   | 1 | 2.69E-07 | 0.262  | 4    | 2       | Tmem150c                                                                                                        | Unknown              |
| DMR14:11218801  | 14 | 11218801  | 1800  | 2 | 1.87E-08 | 0.604  | 0    | 0       |                                                                                                                 |                      |
| DMR14:13503001  | 14 | 13503001  | 300   | 2 | 3.38E-09 | 0.49   | 5    | 1.6667  |                                                                                                                 |                      |
| DMR14:13919601  | 14 | 13919601  | 300   | 1 | 1.61E-09 | 0.553  | 0    | 0       |                                                                                                                 |                      |
| DMR14:16748801  | 14 | 16748801  | 400   | 1 | 7.34E-08 | 0.48   | 2    | 0.5     | Shroom3                                                                                                         | Cytoskeleton         |
| DMR14:17267501  | 14 | 17267501  | 2400  | 1 | 1.71E-07 | 0.64   | 49   | 2.0417  | Sdad1                                                                                                           |                      |
| DMR14:22404101  | 14 | 22404101  | 100   | 1 | 3.74E-08 | 14.234 | 0    | 0       | Ugt2a1;Ugt2b37                                                                                                  | Metabolism           |
| DMR14:23498701  | 14 | 23498701  | 1700  | 2 | 2.36E-07 | 0.376  | 20   | 1.1765  | Gnrhr;Uba6                                                                                                      | Receptor;Proteolysis |
| DMR14:33205901  | 14 | 33205901  | 11500 | 2 | 2.52E-07 | 2.403  | 55   | 0.4783  |                                                                                                                 |                      |
| DMR14:34295101  | 14 | 34295101  | 300   | 1 | 4.58E-07 | 0.437  | 1    | 0.3333  |                                                                                                                 |                      |
| DMR14:34403601  | 14 | 34403601  | 500   | 1 | 9.08E-07 | 0.438  | 2    | 0.4     | Pdcl2                                                                                                           |                      |
| DMR14:36589601  | 14 | 36589601  | 300   | 2 | 2.46E-10 | 0.387  | 0    | 0       | AC114452.1                                                                                                      |                      |
| DMR14:37240001  | 14 | 37240001  | 300   | 1 | 1.81E-07 | 0.246  | 7    | 2.3333  | Dcun1d4                                                                                                         | Proteolysis          |
| DMR14:42453401  | 14 | 42453401  | 2300  | 1 | 9.20E-07 | 0.475  | 43   | 1.8696  |                                                                                                                 |                      |
| DMR14:42869401  | 14 | 42869401  | 1200  | 1 | 1.52E-07 | 0.235  | 14   | 1.1667  | Limch1                                                                                                          | Cytoskeleton         |
| DMR14:42956801  | 14 | 42956801  | 300   | 1 | 4.26E-07 | 0.327  | 4    | 1.3333  | Limch1                                                                                                          | Cytoskeleton         |
| DMR14:44487601  | 14 | 44487601  | 400   | 1 | 7.95E-07 | 0.495  | 1    | 0.25    | Ugdh                                                                                                            | Metabolism           |
| DMR14:44791201  | 14 | 44791201  | 600   | 2 | 1.90E-08 | 0.591  | 3    | 0.5     | AABR07015006.1                                                                                                  |                      |
| DMR14:46637401  | 14 | 46637401  | 24300 | 5 | 2.03E-08 | 0.606  | 2210 | 9.0947  | pRNA;Rn5-8s;AABR07015078.1;AABR07015078.2;AABR07015079.1;AABR07015080.2;LOC257642;AABR07015080.1;AABR07015081.1 |                      |
| DMR14:46678801  | 14 | 46678801  | 10300 | 3 | 1.55E-10 | 0.573  | 1068 | 10.3689 | pRNA;5_8S_rRNA                                                                                                  |                      |
| DMR14:52933301  | 14 | 52933301  | 200   | 1 | 5.38E-07 | 0.426  | 0    | 0       |                                                                                                                 |                      |
| DMR14:60463501  | 14 | 60463501  | 300   | 1 | 6.88E-09 | 0.587  | 1    | 0.3333  | Anapc4                                                                                                          | Cell Cycle           |

|                 |    |           |      |   |          |       |    |        |                               |               |
|-----------------|----|-----------|------|---|----------|-------|----|--------|-------------------------------|---------------|
| DMR14:70073901  | 14 | 70073901  | 2600 | 1 | 9.02E-08 | 5.786 | 19 | 0.7308 | Fam184b                       |               |
| DMR14:70659001  | 14 | 70659001  | 500  | 1 | 4.54E-08 | 0.558 | 4  | 0.8    |                               |               |
| DMR14:77126301  | 14 | 77126301  | 200  | 1 | 2.77E-07 | 0.401 | 1  | 0.5    | Slc2a9                        | Metabolism    |
| DMR14:77659301  | 14 | 77659301  | 2500 | 1 | 5.32E-07 | 0.441 | 31 | 1.24   | AABR07015800.1;AABR07015800.2 |               |
| DMR14:80039401  | 14 | 80039401  | 1200 | 1 | 3.09E-07 | 0.453 | 3  | 0.25   | Ablim2                        | Cytoskeleton  |
| DMR14:80323901  | 14 | 80323901  | 3900 | 3 | 3.25E-07 | 0.716 | 49 | 1.2564 | Acox3                         | Metabolism    |
| DMR14:81141901  | 14 | 81141901  | 600  | 1 | 7.78E-07 | 0.595 | 6  | 1      | Htt                           | Development   |
| DMR14:81457601  | 14 | 81457601  | 500  | 1 | 7.41E-10 | 0.504 | 1  | 0.2    | Sh3bp2;U1                     | Translation   |
| DMR14:84307201  | 14 | 84307201  | 600  | 1 | 4.14E-07 | 0.584 | 0  | 0      | Sec14l4                       | Transport     |
| DMR14:91808701  | 14 | 91808701  | 500  | 3 | 1.12E-07 | 0.554 | 1  | 0.2    | Ikzf1                         | Transcription |
| DMR14:96400201  | 14 | 96400201  | 1700 | 1 | 3.07E-07 | 3.666 | 13 | 0.7647 |                               |               |
| DMR14:103388301 | 14 | 103388301 | 300  | 1 | 7.45E-08 | 0.337 | 4  | 1.3333 | AABR07016556.2                |               |
| DMR14:109239801 | 14 | 109239801 | 1200 | 2 | 1.85E-10 | 0.512 | 15 | 1.25   |                               |               |
| DMR14:114713901 | 14 | 114713901 | 300  | 1 | 7.75E-07 | 0.47  | 1  | 0.3333 |                               |               |
| DMR15:2711401   | 15 | 2711401   | 600  | 1 | 4.14E-07 | 0.643 | 12 | 2      | Samd8;AABR07016873.1          | Metabolism    |
| DMR15:2929001   | 15 | 2929001   | 300  | 1 | 8.09E-07 | 0.395 | 1  | 0.3333 | Kat6b                         | Epigenetic    |
| DMR15:4445501   | 15 | 4445501   | 1800 | 1 | 3.68E-11 | 0.554 | 26 | 1.4444 | Nudt13                        | Metabolism    |
| DMR15:4586401   | 15 | 4586401   | 200  | 1 | 7.30E-07 | 0.256 | 7  | 3.5    | Kcnk5                         | Transport     |
| DMR15:5479301   | 15 | 5479301   | 400  | 1 | 1.45E-08 | 0.615 | 4  | 1      | Spetex-2F;AABR07016950.1      | Unknown       |
| DMR15:13431401  | 15 | 13431401  | 800  | 3 | 8.86E-10 | 0.564 | 3  | 0.375  |                               |               |
| DMR15:14111101  | 15 | 14111101  | 1100 | 2 | 5.41E-11 | 0.5   | 5  | 0.4545 |                               |               |
| DMR15:15103101  | 15 | 15103101  | 1200 | 1 | 7.22E-07 | 0.636 | 14 | 1.1667 |                               |               |
| DMR15:15510001  | 15 | 15510001  | 600  | 1 | 1.77E-07 | 0.344 | 1  | 0.1667 | Cadps                         | Metabolism    |
| DMR15:18496901  | 15 | 18496901  | 5400 | 6 | 9.28E-14 | 0.552 | 72 | 1.3333 | Kctd6                         | Transport     |
| DMR15:19797401  | 15 | 19797401  | 200  | 1 | 9.75E-07 | 0.291 | 6  | 3      |                               |               |
| DMR15:19849701  | 15 | 19849701  | 200  | 1 | 2.80E-10 | 0.531 | 6  | 3      | Fermt2                        |               |
| DMR15:21611601  | 15 | 21611601  | 1300 | 1 | 3.00E-07 | 0.491 | 9  | 0.6923 |                               |               |
| DMR15:23000001  | 15 | 23000001  | 500  | 1 | 5.58E-08 | 3.575 | 2  | 0.4    |                               |               |
| DMR15:23010401  | 15 | 23010401  | 1700 | 1 | 3.16E-07 | 0.559 | 33 | 1.9412 |                               |               |
| DMR15:23013301  | 15 | 23013301  | 900  | 2 | 4.58E-07 | 2.841 | 8  | 0.8889 |                               |               |
| DMR15:23021801  | 15 | 23021801  | 3800 | 1 | 9.67E-08 | 2.406 | 79 | 2.0789 |                               |               |
| DMR15:36825201  | 15 | 36825201  | 800  | 2 | 1.22E-07 | 0.559 | 7  | 0.875  | Parp4                         |               |
| DMR15:40212101  | 15 | 40212101  | 1500 | 2 | 2.40E-09 | 0.326 | 2  | 0.1333 | Atp8a2                        | Transport     |
| DMR15:44154201  | 15 | 44154201  | 700  | 1 | 6.18E-10 | 0.495 | 10 | 1.4286 |                               |               |
| DMR15:48015801  | 15 | 48015801  | 2100 | 1 | 3.09E-08 | 0.606 | 23 | 1.0952 |                               |               |
| DMR15:48744101  | 15 | 48744101  | 1200 | 1 | 1.11E-08 | 0.437 | 5  | 0.4167 |                               |               |
| DMR15:51373701  | 15 | 51373701  | 1100 | 1 | 4.02E-08 | 0.502 | 28 | 2.5455 | Loxl2;AABR07018321.2;R3hcc1   | Metabolism    |
| DMR15:53935701  | 15 | 53935701  | 1500 | 1 | 2.03E-07 | 0.502 | 8  | 0.5333 |                               |               |
| DMR15:55010901  | 15 | 55010901  | 500  | 1 | 3.48E-07 | 0.497 | 0  | 0      |                               |               |
| DMR15:56208101  | 15 | 56208101  | 200  | 1 | 3.61E-07 | 0.563 | 0  | 0      |                               |               |
| DMR15:57730201  | 15 | 57730201  | 600  | 1 | 3.23E-08 | 0.588 | 2  | 0.3333 |                               |               |
| DMR15:61233701  | 15 | 61233701  | 200  | 1 | 5.16E-07 | 0.383 | 0  | 0      |                               |               |
| DMR15:62937001  | 15 | 62937001  | 500  | 3 | 4.12E-12 | 0.592 | 0  | 0      |                               |               |
| DMR15:65188801  | 15 | 65188801  | 1600 | 1 | 9.81E-07 | 3.032 | 13 | 0.8125 | AABR07018574.1                |               |
| DMR15:65285201  | 15 | 65285201  | 900  | 1 | 5.71E-07 | 3.849 | 7  | 0.7778 |                               |               |
| DMR15:67199601  | 15 | 67199601  | 200  | 1 | 3.99E-07 | 0.667 | 0  | 0      |                               |               |
| DMR15:76829801  | 15 | 76829801  | 500  | 2 | 1.21E-12 | 0.429 | 2  | 0.4    |                               |               |
| DMR15:78122501  | 15 | 78122501  | 500  | 1 | 8.27E-09 | 0.656 | 0  | 0      |                               |               |
| DMR15:79490401  | 15 | 79490401  | 200  | 1 | 5.13E-07 | 0.39  | 2  | 1      |                               |               |
| DMR15:84328101  | 15 | 84328101  | 400  | 1 | 3.65E-07 | 0.491 | 0  | 0      | Klf12                         | Transcription |
| DMR15:91578801  | 15 | 91578801  | 500  | 3 | 6.81E-09 | 0.583 | 2  | 0.4    | Mycbp2                        | Metabolism    |
| DMR15:104699101 | 15 | 104699101 | 500  | 1 | 7.87E-07 | 0.407 | 1  | 0.2    | Hs6st3                        | Metabolism    |
| DMR15:108477701 | 15 | 108477701 | 300  | 1 | 1.42E-09 | 0.487 | 0  | 0      |                               |               |
| DMR15:108869901 | 15 | 108869901 | 600  | 1 | 2.90E-07 | 0.355 | 8  | 1.3333 | AC123185.3                    |               |
| DMR16:124601    | 16 | 124601    | 1100 | 1 | 7.08E-08 | 0.388 | 5  | 0.4545 |                               |               |
| DMR16:605801    | 16 | 605801    | 900  | 1 | 4.14E-09 | 0.396 | 7  | 0.7778 | AABR07024473.2                |               |

|                |    |          |      |   |          |       |    |        |                         |                                          |
|----------------|----|----------|------|---|----------|-------|----|--------|-------------------------|------------------------------------------|
| DMR16:1427901  | 16 | 1427901  | 400  | 1 | 6.58E-09 | 0.535 | 3  | 0.75   |                         |                                          |
| DMR16:1844401  | 16 | 1844401  | 2200 | 3 | 2.19E-10 | 0.58  | 2  | 0.0909 | Zmiz1                   | Metabolism                               |
| DMR16:2068701  | 16 | 2068701  | 1900 | 1 | 2.47E-07 | 0.426 | 22 | 1.1579 | AABR07024500.1          |                                          |
| DMR16:2185801  | 16 | 2185801  | 400  | 1 | 2.37E-08 | 0.492 | 0  | 0      | Slmap;SNORA71           | Protein Binding                          |
| DMR16:8717801  | 16 | 8717801  | 400  | 1 | 2.34E-07 | 0.43  | 0  | 0      |                         |                                          |
| DMR16:10549601 | 16 | 10549601 | 500  | 1 | 2.94E-07 | 0.642 | 4  | 0.8    | Syt15                   | Transport                                |
| DMR16:11166801 | 16 | 11166801 | 400  | 1 | 9.37E-07 | 0.507 | 1  | 0.25   |                         |                                          |
| DMR16:11694001 | 16 | 11694001 | 500  | 1 | 8.78E-09 | 0.578 | 3  | 0.6    | Grid1                   | Receptor                                 |
| DMR16:12656501 | 16 | 12656501 | 500  | 1 | 9.92E-11 | 0.448 | 4  | 0.8    | RGD1559508              | Unknown                                  |
| DMR16:18370601 | 16 | 18370601 | 300  | 1 | 2.54E-07 | 0.307 | 1  | 0.3333 | AABR07024825.1          |                                          |
| DMR16:18439601 | 16 | 18439601 | 300  | 1 | 1.33E-07 | 0.308 | 4  | 1.3333 | Fam60a                  |                                          |
| DMR16:20851601 | 16 | 20851601 | 300  | 1 | 4.96E-09 | 0.516 | 1  | 0.3333 | Upf1;Gdf1;Cers1         | Transcription;Growth Factors & Cytokines |
| DMR16:21773501 | 16 | 21773501 | 2900 | 1 | 2.10E-08 | 0.668 | 14 | 0.4828 | AABR07024907.1          |                                          |
| DMR16:22013301 | 16 | 22013301 | 1900 | 1 | 2.41E-07 | 0.562 | 56 | 2.9474 | RGD1563748              |                                          |
| DMR16:22115001 | 16 | 22115001 | 4600 | 1 | 2.31E-07 | 0.688 | 51 | 1.1087 | RGD1563748              |                                          |
| DMR16:26229001 | 16 | 26229001 | 1300 | 1 | 8.98E-07 | 0.294 | 14 | 1.0769 |                         |                                          |
| DMR16:30802301 | 16 | 30802301 | 2000 | 1 | 5.21E-07 | 4.012 | 21 | 1.05   |                         |                                          |
| DMR16:39915101 | 16 | 39915101 | 300  | 1 | 5.03E-07 | 0.501 | 3  | 1      | Wdr17                   |                                          |
| DMR16:40060601 | 16 | 40060601 | 700  | 1 | 2.59E-07 | 0.186 | 5  | 0.7143 | Spcs3                   | Protease                                 |
| DMR16:43155401 | 16 | 43155401 | 500  | 1 | 7.75E-07 | 0.484 | 2  | 0.4    |                         |                                          |
| DMR16:45516901 | 16 | 45516901 | 500  | 1 | 4.73E-07 | 0.502 | 1  | 0.2    |                         |                                          |
| DMR16:46280801 | 16 | 46280801 | 300  | 1 | 5.75E-07 | 0.584 | 0  | 0      |                         |                                          |
| DMR16:49838201 | 16 | 49838201 | 1100 | 1 | 4.50E-08 | 0.458 | 6  | 0.5455 |                         |                                          |
| DMR16:54203001 | 16 | 54203001 | 100  | 1 | 1.97E-07 | 0.26  | 0  | 0      |                         |                                          |
| DMR16:60601501 | 16 | 60601501 | 300  | 1 | 2.10E-08 | 0.398 | 10 | 3.3333 |                         |                                          |
| DMR16:60624601 | 16 | 60624601 | 1000 | 1 | 1.12E-07 | 0.515 | 11 | 1.1    |                         |                                          |
| DMR16:63001901 | 16 | 63001901 | 200  | 1 | 5.01E-08 | 0.411 | 0  | 0      |                         |                                          |
| DMR16:66360701 | 16 | 66360701 | 1700 | 1 | 9.18E-07 | 0.554 | 9  | 0.5294 | LOC689479               | Unknown                                  |
| DMR16:68333301 | 16 | 68333301 | 300  | 1 | 3.18E-09 | 0.39  | 1  | 0.3333 |                         |                                          |
| DMR16:68841301 | 16 | 68841301 | 300  | 1 | 8.89E-09 | 0.52  | 0  | 0      | Poteg                   |                                          |
| DMR16:68975401 | 16 | 68975401 | 300  | 1 | 8.72E-09 | 0.247 | 1  | 0.3333 | Eif4ebp1;Rn60_16_0690.3 | Transcription                            |
| DMR16:70613301 | 16 | 70613301 | 300  | 1 | 1.05E-10 | 0.537 | 0  | 0      |                         |                                          |
| DMR16:71868401 | 16 | 71868401 | 1200 | 2 | 2.41E-09 | 0.502 | 2  | 0.1667 | Adam9                   | Protease                                 |
| DMR16:72106801 | 16 | 72106801 | 1100 | 2 | 5.10E-10 | 0.44  | 14 | 1.2727 | Adam3a                  |                                          |
| DMR16:72208201 | 16 | 72208201 | 900  | 1 | 2.61E-07 | 2.128 | 3  | 0.3333 | Adam18;ldo1             | Protease;Signaling                       |
| DMR16:72696001 | 16 | 72696001 | 600  | 1 | 5.79E-07 | 0.658 | 10 | 1.6667 | AABR07026339.1          |                                          |
| DMR16:74336601 | 16 | 74336601 | 500  | 1 | 6.12E-09 | 0.599 | 3  | 0.6    | Slc20a2                 | Metabolism                               |
| DMR16:75924801 | 16 | 75924801 | 1100 | 1 | 7.29E-07 | 0.529 | 30 | 2.7273 | Mcph1                   | DNA Repair                               |
| DMR16:79083601 | 16 | 79083601 | 300  | 1 | 4.49E-08 | 0.509 | 1  | 0.3333 | AABR07026499.3          |                                          |
| DMR16:79318001 | 16 | 79318001 | 300  | 1 | 4.45E-09 | 0.536 | 1  | 0.3333 |                         |                                          |
| DMR16:80318201 | 16 | 80318201 | 400  | 1 | 4.62E-07 | 4.76  | 7  | 1.75   |                         |                                          |
| DMR16:80898301 | 16 | 80898301 | 800  | 1 | 5.71E-07 | 0.297 | 19 | 2.375  | Tmco3                   | Transport                                |
| DMR16:83696401 | 16 | 83696401 | 500  | 1 | 2.88E-08 | 0.668 | 7  | 1.4    |                         |                                          |
| DMR16:84031701 | 16 | 84031701 | 300  | 1 | 2.55E-10 | 0.463 | 1  | 0.3333 |                         |                                          |
| DMR16:84654401 | 16 | 84654401 | 700  | 1 | 9.31E-07 | 0.53  | 1  | 0.1429 | Myo16                   | Cytoskeleton                             |
| DMR16:84695301 | 16 | 84695301 | 300  | 1 | 7.65E-07 | 0.435 | 0  | 0      | Myo16                   | Cytoskeleton                             |
| DMR16:86499101 | 16 | 86499101 | 300  | 2 | 1.33E-07 | 0.538 | 0  | 0      |                         |                                          |
| DMR16:88332401 | 16 | 88332401 | 200  | 1 | 4.57E-09 | 0.532 | 0  | 0      |                         |                                          |
| DMR17:947401   | 17 | 947401   | 400  | 2 | 1.51E-11 | 0.559 | 0  | 0      | Fancc                   |                                          |
| DMR17:4056201  | 17 | 4056201  | 400  | 1 | 1.52E-07 | 0.489 | 1  | 0.25   | LOC100364523;Ctsql2     |                                          |
| DMR17:5033001  | 17 | 5033001  | 500  | 2 | 2.67E-08 | 0.369 | 1  | 0.2    |                         |                                          |
| DMR17:6313501  | 17 | 6313501  | 400  | 2 | 6.42E-07 | 0.361 | 0  | 0      |                         |                                          |
| DMR17:6565801  | 17 | 6565801  | 400  | 1 | 9.16E-07 | 0.413 | 7  | 1.75   |                         |                                          |
| DMR17:7167901  | 17 | 7167901  | 1300 | 2 | 4.28E-10 | 0.573 | 18 | 1.3846 |                         |                                          |
| DMR17:7190501  | 17 | 7190501  | 2000 | 2 | 2.97E-11 | 0.608 | 23 | 1.15   |                         |                                          |
| DMR17:8593301  | 17 | 8593301  | 800  | 2 | 1.55E-08 | 0.458 | 6  | 0.75   | Slc25a48                |                                          |
| DMR17:9742701  | 17 | 9742701  | 600  | 1 | 1.46E-07 | 0.58  | 2  | 0.3333 | F12;Pfn3;Slc34a1        | Protease;Cytoskeleton; Metabolism        |

|                |    |          |      |   |          |       |    |        |                               |                          |
|----------------|----|----------|------|---|----------|-------|----|--------|-------------------------------|--------------------------|
| DMR17:10243501 | 17 | 10243501 | 400  | 2 | 2.36E-10 | 0.536 | 1  | 0.25   |                               |                          |
| DMR17:11754001 | 17 | 11754001 | 600  | 2 | 1.34E-07 | 0.633 | 4  | 0.6667 |                               |                          |
| DMR17:11760201 | 17 | 11760201 | 1900 | 4 | 9.98E-12 | 0.582 | 18 | 0.9474 |                               |                          |
| DMR17:11799301 | 17 | 11799301 | 1800 | 1 | 4.77E-09 | 0.651 | 22 | 1.2222 |                               |                          |
| DMR17:11925001 | 17 | 11925001 | 1300 | 1 | 1.30E-07 | 0.229 | 24 | 1.8462 | RGD1561671                    |                          |
| DMR17:11929101 | 17 | 11929101 | 200  | 1 | 2.74E-07 | 0.441 | 0  | 0      |                               |                          |
| DMR17:12606501 | 17 | 12606501 | 500  | 2 | 1.57E-08 | 0.491 | 4  | 0.8    | Syk                           | Signaling                |
| DMR17:12998401 | 17 | 12998401 | 400  | 1 | 7.39E-07 | 0.557 | 2  | 0.5    |                               |                          |
| DMR17:13169501 | 17 | 13169501 | 300  | 1 | 6.77E-07 | 0.516 | 4  | 1.3333 |                               |                          |
| DMR17:14004201 | 17 | 14004201 | 1200 | 1 | 2.28E-07 | 13.93 | 13 | 1.0833 |                               |                          |
| DMR17:15685001 | 17 | 15685001 | 600  | 2 | 1.91E-12 | 0.552 | 3  | 0.5    | Bicd2                         |                          |
| DMR17:17142201 | 17 | 17142201 | 700  | 1 | 2.36E-08 | 0.461 | 9  | 1.2857 | AABR07027157.1                |                          |
| DMR17:17600401 | 17 | 17600401 | 900  | 1 | 3.23E-07 | 0.47  | 11 | 1.2222 |                               |                          |
| DMR17:19522801 | 17 | 19522801 | 1500 | 2 | 2.90E-15 | 0.564 | 11 | 0.7333 | Atxn1                         | Transcription            |
| DMR17:19760201 | 17 | 19760201 | 1300 | 2 | 1.98E-09 | 0.406 | 22 | 1.6923 |                               |                          |
| DMR17:19878401 | 17 | 19878401 | 400  | 1 | 4.55E-11 | 0.598 | 0  | 0      |                               |                          |
| DMR17:21143301 | 17 | 21143301 | 500  | 1 | 3.76E-08 | 0.608 | 8  | 1.6    |                               |                          |
| DMR17:21456901 | 17 | 21456901 | 300  | 1 | 9.85E-08 | 0.422 | 7  | 2.3333 | Sycp2l                        |                          |
| DMR17:25019601 | 17 | 25019601 | 400  | 1 | 8.66E-07 | 0.529 | 7  | 1.75   |                               |                          |
| DMR17:29837701 | 17 | 29837701 | 600  | 3 | 6.85E-11 | 0.586 | 0  | 0      | Cdyl                          | Metabolism               |
| DMR17:39442601 | 17 | 39442601 | 200  | 1 | 6.97E-07 | 4.335 | 2  | 1      | Prl8a4                        |                          |
| DMR17:43752701 | 17 | 43752701 | 200  | 1 | 2.11E-08 | 0.492 | 0  | 0      |                               |                          |
| DMR17:54612301 | 17 | 54612301 | 500  | 1 | 5.44E-07 | 0.42  | 1  | 0.2    |                               |                          |
| DMR17:56190501 | 17 | 56190501 | 700  | 2 | 9.16E-09 | 0.454 | 7  | 1      |                               |                          |
| DMR17:69602501 | 17 | 69602501 | 400  | 1 | 1.39E-07 | 0.62  | 2  | 0.5    | Akr1c12l1                     | Metabolism               |
| DMR17:72872601 | 17 | 72872601 | 600  | 1 | 1.99E-07 | 0.545 | 4  | 0.6667 |                               |                          |
| DMR17:74005801 | 17 | 74005801 | 300  | 1 | 4.14E-07 | 0.622 | 3  | 1      | AABR07028534.1;AABR07028535.1 |                          |
| DMR17:76302801 | 17 | 76302801 | 900  | 2 | 4.43E-08 | 0.412 | 6  | 0.6667 | AC141220.1;Dhtkd1             | Metabolism               |
| DMR17:81281701 | 17 | 81281701 | 400  | 1 | 2.32E-07 | 0.567 | 3  | 0.75   | Tmem236                       |                          |
| DMR17:82084501 | 17 | 82084501 | 400  | 2 | 2.37E-11 | 0.403 | 1  | 0.25   | Arl5b                         | Translation              |
| DMR17:85010901 | 17 | 85010901 | 200  | 1 | 8.87E-08 | 0.222 | 5  | 2.5    | Dnajc1                        | Protein Binding          |
| DMR17:85992701 | 17 | 85992701 | 300  | 1 | 2.23E-07 | 0.389 | 0  | 0      | Armc3                         |                          |
| DMR17:86187001 | 17 | 86187001 | 300  | 1 | 5.43E-07 | 0.448 | 1  | 0.3333 |                               |                          |
| DMR17:89432501 | 17 | 89432501 | 1200 | 1 | 1.70E-08 | 0.481 | 5  | 0.4167 |                               |                          |
| DMR17:89452301 | 17 | 89452301 | 6000 | 1 | 1.26E-07 | 0.672 | 54 | 0.9    | RGD1561231                    |                          |
| DMR17:90299401 | 17 | 90299401 | 1400 | 1 | 3.36E-08 | 0.347 | 21 | 1.5    | Gng4                          | Signaling                |
| DMR18:4167301  | 18 | 4167301  | 300  | 1 | 4.04E-08 | 0.618 | 1  | 0.3333 | Osbp1a                        | Binding Protein          |
| DMR18:6587101  | 18 | 6587101  | 500  | 1 | 1.95E-08 | 0.576 | 4  | 0.8    | LOC103694404                  |                          |
| DMR18:13487301 | 18 | 13487301 | 600  | 4 | 7.66E-10 | 0.534 | 0  | 0      | Asxl3                         |                          |
| DMR18:17176801 | 18 | 17176801 | 600  | 3 | 1.77E-09 | 0.54  | 0  | 0      | Fhod3;Rn60_18_0172.2          | Cytoskeleton             |
| DMR18:24409901 | 18 | 24409901 | 5100 | 2 | 2.68E-07 | 0.526 | 42 | 0.8235 | Sap130                        | Transcription            |
| DMR18:26894101 | 18 | 26894101 | 600  | 1 | 1.49E-08 | 0.6   | 4  | 0.6667 |                               |                          |
| DMR18:31973301 | 18 | 31973301 | 600  | 4 | 1.78E-13 | 0.531 | 0  | 0      | Arhgap26                      | Signaling                |
| DMR18:34631101 | 18 | 34631101 | 300  | 1 | 4.62E-07 | 4.92  | 1  | 0.3333 |                               |                          |
| DMR18:40305301 | 18 | 40305301 | 300  | 1 | 3.92E-07 | 3.455 | 2  | 0.6667 | AABR07031952.1                |                          |
| DMR18:40520801 | 18 | 40520801 | 300  | 1 | 6.40E-08 | 0.592 | 0  | 0      | Fem1c                         | Unknown                  |
| DMR18:43677601 | 18 | 43677601 | 300  | 1 | 2.64E-07 | 0.474 | 2  | 0.6667 |                               |                          |
| DMR18:51234801 | 18 | 51234801 | 200  | 1 | 1.03E-07 | 0.463 | 1  | 0.5    |                               |                          |
| DMR18:56335001 | 18 | 56335001 | 300  | 1 | 2.18E-07 | 0.536 | 1  | 0.3333 | Slc6a7;Cdx1                   | Metabolism;Transcription |
| DMR18:57175801 | 18 | 57175801 | 2000 | 2 | 1.15E-10 | 0.589 | 4  | 0.2    | Ablim3                        | Cytoskeleton             |
| DMR18:57229901 | 18 | 57229901 | 1400 | 1 | 3.17E-08 | 0.559 | 12 | 0.8571 | Ablim3                        | Cytoskeleton             |
| DMR18:57310901 | 18 | 57310901 | 600  | 1 | 1.41E-07 | 0.371 | 6  | 1      | Sh3tc2                        | Development              |
| DMR18:57540701 | 18 | 57540701 | 1300 | 2 | 1.42E-07 | 0.559 | 3  | 0.2308 | AABR07032261.3;AABR07032261.4 |                          |
| DMR18:59926501 | 18 | 59926501 | 600  | 1 | 6.63E-07 | 0.467 | 2  | 0.3333 |                               |                          |
| DMR18:70151701 | 18 | 70151701 | 300  | 1 | 5.09E-07 | 0.648 | 1  | 0.3333 |                               |                          |
| DMR18:70943501 | 18 | 70943501 | 600  | 2 | 5.25E-09 | 0.494 | 11 | 1.8333 |                               |                          |



|                |    |          |      |   |          |        |     |        |                                 |                                     |
|----------------|----|----------|------|---|----------|--------|-----|--------|---------------------------------|-------------------------------------|
| DMR18:70979701 | 18 | 70979701 | 300  | 1 | 5.40E-07 | 0.321  | 3   | 1      | SNORD58;Rpl17;RGD1562           | Translation;EST                     |
| DMR18:71357801 | 18 | 71357801 | 900  | 1 | 2.46E-07 | 0.352  | 44  | 4.8889 |                                 |                                     |
| DMR18:72887701 | 18 | 72887701 | 1200 | 1 | 1.61E-07 | 0.691  | 20  | 1.6667 |                                 |                                     |
| DMR18:73614601 | 18 | 73614601 | 400  | 2 | 8.36E-12 | 0.315  | 1   | 0.25   | St8sia5                         | Metabolism                          |
| DMR18:73747801 | 18 | 73747801 | 400  | 1 | 5.56E-11 | 0.547  | 0   | 0      | Loxhd1                          |                                     |
| DMR18:76894201 | 18 | 76894201 | 300  | 1 | 5.57E-12 | 0.497  | 0   | 0      |                                 |                                     |
| DMR18:77234301 | 18 | 77234301 | 1400 | 1 | 2.13E-07 | 0.315  | 38  | 2.7143 | Nfatc1                          | Transcription                       |
| DMR18:77395601 | 18 | 77395601 | 400  | 1 | 1.14E-07 | 0.624  | 2   | 0.5    | Atp9b                           | Transport                           |
| DMR18:78869201 | 18 | 78869201 | 400  | 1 | 8.64E-09 | 0.614  | 0   | 0      |                                 |                                     |
| DMR18:79438101 | 18 | 79438101 | 2700 | 3 | 1.04E-08 | 2.591  | 28  | 1.037  | Mbp                             | Unknown                             |
| DMR18:79732701 | 18 | 79732701 | 2000 | 1 | 4.04E-09 | 0.518  | 40  | 2      |                                 |                                     |
| DMR18:79924301 | 18 | 79924301 | 200  | 2 | 8.48E-09 | 0.206  | 1   | 0.5    |                                 |                                     |
| DMR18:79927201 | 18 | 79927201 | 1100 | 1 | 4.73E-07 | 0.577  | 13  | 1.1818 |                                 |                                     |
| DMR18:80084401 | 18 | 80084401 | 1000 | 2 | 4.48E-12 | 0.275  | 15  | 1.5    |                                 |                                     |
| DMR18:80191401 | 18 | 80191401 | 100  | 1 | 4.73E-07 | 5.112  | 3   | 3      | AABR07032758.1                  |                                     |
| DMR18:80608901 | 18 | 80608901 | 3200 | 1 | 2.19E-11 | 0.357  | 88  | 2.75   |                                 |                                     |
| DMR18:81005401 | 18 | 81005401 | 700  | 3 | 2.32E-10 | 0.472  | 2   | 0.2857 |                                 |                                     |
| DMR18:81383001 | 18 | 81383001 | 1400 | 1 | 9.56E-08 | 0.558  | 12  | 0.8571 | Zfp407                          | Transcription                       |
| DMR18:81612501 | 18 | 81612501 | 900  | 1 | 2.44E-07 | 0.492  | 3   | 0.3333 |                                 |                                     |
| DMR18:81672901 | 18 | 81672901 | 200  | 1 | 1.69E-07 | 0.222  | 4   | 2      | LOC100359752;7SK                |                                     |
| DMR18:87797401 | 18 | 87797401 | 1300 | 2 | 4.93E-11 | 2.31   | 24  | 1.8462 |                                 |                                     |
| DMR19:306401   | 19 | 306401   | 5100 | 2 | 2.16E-13 | 0.585  | 33  | 0.6471 | AABR07042611.1                  |                                     |
| DMR19:3444301  | 19 | 3444301  | 300  | 1 | 3.86E-07 | 0.442  | 1   | 0.3333 |                                 |                                     |
| DMR19:5829101  | 19 | 5829101  | 6400 | 1 | 8.74E-08 | 0.633  | 121 | 1.8906 |                                 |                                     |
| DMR19:8323201  | 19 | 8323201  | 800  | 1 | 9.48E-10 | 0.566  | 12  | 1.5    |                                 |                                     |
| DMR19:13937101 | 19 | 13937101 | 800  | 1 | 1.90E-07 | 0.517  | 2   | 0.25   |                                 |                                     |
| DMR19:14401801 | 19 | 14401801 | 100  | 1 | 1.30E-17 | 0.063  | 2   | 2      | Tom1                            | Signaling                           |
| DMR19:15148701 | 19 | 15148701 | 300  | 1 | 6.09E-08 | 0.625  | 4   | 1.3333 | Ces1d;Ces1f                     | Metabolism                          |
| DMR19:15937901 | 19 | 15937901 | 600  | 1 | 2.60E-10 | 0.184  | 3   | 0.5    |                                 |                                     |
| DMR19:19075301 | 19 | 19075301 | 1800 | 2 | 5.72E-08 | 0.459  | 21  | 1.1667 |                                 |                                     |
| DMR19:19943401 | 19 | 19943401 | 300  | 1 | 5.25E-07 | 0.291  | 0   | 0      |                                 |                                     |
| DMR19:22137001 | 19 | 22137001 | 300  | 1 | 3.42E-08 | 2.612  | 3   | 1      | Phkb                            | Signaling                           |
| DMR19:23362801 | 19 | 23362801 | 400  | 1 | 2.12E-09 | 0.543  | 4   | 1      |                                 |                                     |
| DMR19:26331701 | 19 | 26331701 | 400  | 1 | 9.81E-07 | 0.344  | 2   | 0.5    |                                 |                                     |
| DMR19:28131101 | 19 | 28131101 | 400  | 1 | 1.65E-07 | 0.519  | 2   | 0.5    |                                 |                                     |
| DMR19:28160901 | 19 | 28160901 | 1500 | 1 | 4.19E-07 | 13.116 | 12  | 0.8    |                                 |                                     |
| DMR19:38934801 | 19 | 38934801 | 600  | 3 | 3.87E-10 | 0.295  | 3   | 0.5    | Tango6                          |                                     |
| DMR19:39266801 | 19 | 39266801 | 1900 | 1 | 7.53E-07 | 0.585  | 16  | 0.8421 | Cog8;Nip7;Tmed6;Terf2           | Golgi;Transcription;Binding Protein |
| DMR19:46136101 | 19 | 46136101 | 800  | 1 | 8.41E-09 | 0.476  | 2   | 0.25   |                                 |                                     |
| DMR19:47274401 | 19 | 47274401 | 500  | 1 | 7.36E-07 | 0.49   | 2   | 0.4    |                                 |                                     |
| DMR19:48069901 | 19 | 48069901 | 1100 | 1 | 1.81E-07 | 0.398  | 4   | 0.3636 |                                 |                                     |
| DMR19:48943901 | 19 | 48943901 | 300  | 1 | 4.41E-07 | 0.479  | 1   | 0.3333 |                                 |                                     |
| DMR19:49747901 | 19 | 49747901 | 500  | 1 | 5.14E-09 | 0.534  | 5   | 1      | Gan                             | Cytoskeleton                        |
| DMR19:52295401 | 19 | 52295401 | 800  | 1 | 5.60E-07 | 0.517  | 0   | 0      |                                 |                                     |
| DMR19:52419301 | 19 | 52419301 | 2900 | 3 | 5.12E-08 | 0.461  | 38  | 1.3103 | Tldc1                           | Unknown                             |
| DMR19:53316601 | 19 | 53316601 | 400  | 2 | 1.47E-08 | 0.551  | 4   | 1      |                                 |                                     |
| DMR19:55152301 | 19 | 55152301 | 700  | 1 | 2.19E-07 | 0.339  | 14  | 2      | Zfpm1                           | Transcription                       |
| DMR19:55973501 | 19 | 55973501 | 300  | 1 | 4.37E-07 | 0.198  | 6   | 2      | Sult5a1;Dpep1                   | Metabolism                          |
| DMR19:56336201 | 19 | 56336201 | 400  | 2 | 1.42E-09 | 0.565  | 19  | 4.75   | Gas8;5S_rRNA                    | Cell Cycle                          |
| DMR19:56337701 | 19 | 56337701 | 1700 | 6 | 9.04E-14 | 0.625  | 85  | 5      | Gas8;5S_rRNA                    | Cell Cycle                          |
| DMR20:2584701  | 20 | 2584701  | 600  | 2 | 8.16E-08 | 0.53   | 2   | 0.3333 | Rn50_20_0026.4                  |                                     |
| DMR20:4024901  | 20 | 4024901  | 500  | 1 | 3.83E-07 | 0.515  | 7   | 1.4    | RT1-DOb                         | Immune                              |
| DMR20:4765201  | 20 | 4765201  | 1400 | 1 | 8.49E-08 | 0.669  | 16  | 1.1429 | RT1-CE1;RT1-CE4;RT1-CE6;RT1-CE7 | Immune                              |
| DMR20:6324401  | 20 | 6324401  | 400  | 2 | 1.07E-07 | 0.343  | 8   | 2      | Rn60_20_0064.1                  |                                     |
| DMR20:6709201  | 20 | 6709201  | 900  | 2 | 8.42E-10 | 0.287  | 34  | 3.7778 | Ppil1                           | Immune                              |
| DMR20:8044901  | 20 | 8044901  | 1300 | 3 | 7.93E-11 | 0.595  | 12  | 0.9231 |                                 |                                     |

|                |    |           |       |    |          |        |    |        |                      |                                |
|----------------|----|-----------|-------|----|----------|--------|----|--------|----------------------|--------------------------------|
| DMR20:9543801  | 20 | 9543801   | 300   | 1  | 1.23E-07 | 0.379  | 6  | 2      | Dnah8                | Cytoskeleton                   |
| DMR20:9580701  | 20 | 9580701   | 900   | 1  | 2.14E-08 | 0.583  | 9  | 1      | Glpr1                | Receptor                       |
| DMR20:10179301 | 20 | 10179301  | 500   | 1  | 3.43E-08 | 0.414  | 3  | 0.6    | Pde9a                | Signaling                      |
| DMR20:10284401 | 20 | 10284401  | 500   | 1  | 6.30E-07 | 0.442  | 2  | 0.4    | Ndufv3;SNORA36       | Metabolism                     |
| DMR20:12157201 | 20 | 12157201  | 1000  | 1  | 3.38E-08 | 0.358  | 26 | 2.6    |                      |                                |
| DMR20:13070801 | 20 | 13070801  | 600   | 1  | 3.58E-07 | 0.687  | 10 | 1.6667 | Dip2a                |                                |
| DMR20:13447801 | 20 | 13447801  | 700   | 1  | 2.12E-07 | 0.401  | 2  | 0.2857 | Slc5a4               | Transport                      |
| DMR20:14403201 | 20 | 14403201  | 700   | 2  | 9.87E-11 | 0.499  | 0  | 0      | Specc1l              |                                |
| DMR20:19259201 | 20 | 19259201  | 600   | 1  | 4.31E-07 | 0.589  | 5  | 0.8333 |                      |                                |
| DMR20:20501301 | 20 | 20501301  | 1800  | 1  | 1.21E-08 | 0.484  | 13 | 0.7222 |                      |                                |
| DMR20:23391301 | 20 | 23391301  | 1300  | 3  | 1.63E-11 | 0.622  | 1  | 0.0769 |                      |                                |
| DMR20:23907401 | 20 | 23907401  | 300   | 1  | 4.66E-08 | 0.291  | 2  | 0.6667 |                      |                                |
| DMR20:26002301 | 20 | 26002301  | 500   | 1  | 3.71E-07 | 0.3    | 1  | 0.2    | Lrrtm3               | Receptor                       |
| DMR20:26919601 | 20 | 26919601  | 600   | 2  | 2.91E-07 | 0.543  | 3  | 0.5    | Dnajc12              | Protein Binding                |
| DMR20:28594801 | 20 | 28594801  | 1200  | 1  | 7.33E-07 | 0.205  | 9  | 0.75   | Sh3rf3               |                                |
| DMR20:29846101 | 20 | 29846101  | 2700  | 1  | 1.10E-07 | 0.571  | 61 | 2.2593 | Psap;Cdh23           | Signaling;Extracellular Matrix |
| DMR20:30473701 | 20 | 30473701  | 300   | 1  | 1.25E-08 | 0.398  | 0  | 0      |                      |                                |
| DMR20:31823501 | 20 | 31823501  | 400   | 1  | 7.06E-09 | 0.461  | 3  | 0.75   | Tspan15              | Extracellular Matrix           |
| DMR20:42391801 | 20 | 42391801  | 400   | 1  | 7.22E-07 | 0.389  | 3  | 0.75   | AABR07045313.1       |                                |
| DMR20:44324301 | 20 | 44324301  | 1500  | 1  | 4.92E-07 | 0.669  | 10 | 0.6667 |                      |                                |
| DMR20:45007301 | 20 | 45007301  | 200   | 1  | 2.09E-09 | 0.509  | 1  | 0.5    | Mfsd4b;RGD1304770    |                                |
| DMR20:46358701 | 20 | 46358701  | 2400  | 1  | 2.84E-08 | 0.366  | 36 | 1.5    |                      |                                |
| DMR20:46777401 | 20 | 46777401  | 400   | 1  | 2.53E-07 | 0.463  | 3  | 0.75   | Armc2                | Transcription                  |
| DMR20:47157401 | 20 | 47157401  | 600   | 1  | 3.54E-09 | 0.469  | 6  | 1      | Lace1;AABR07045427.1 | Metabolism                     |
| DMR20:47664601 | 20 | 47664601  | 200   | 1  | 2.93E-08 | 3.312  | 5  | 2.5    | Scml4                | Transcription                  |
| DMR20:48143701 | 20 | 48143701  | 1700  | 2  | 9.40E-11 | 0.608  | 13 | 0.7647 | Pdss2                | Metabolism                     |
| DMR20:50334101 | 20 | 50334101  | 300   | 1  | 3.20E-09 | 0.539  | 0  | 0      |                      |                                |
| DMRX:143301    | X  | 143301    | 3200  | 1  | 2.44E-09 | 3.909  | 42 | 1.3125 |                      |                                |
| DMRX:2200201   | X  | 2200201   | 6000  | 2  | 1.83E-08 | 0.677  | 32 | 0.5333 |                      |                                |
| DMRX:2207901   | X  | 2207901   | 800   | 1  | 3.35E-08 | 0.683  | 9  | 1.125  |                      |                                |
| DMRX:2211801   | X  | 2211801   | 10100 | 10 | 2.69E-10 | 0.687  | 78 | 0.7723 |                      |                                |
| DMRX:2341701   | X  | 2341701   | 4600  | 5  | 1.37E-08 | 0.663  | 29 | 0.6304 |                      |                                |
| DMRX:2347501   | X  | 2347501   | 2800  | 1  | 2.64E-07 | 0.658  | 17 | 0.6071 |                      |                                |
| DMRX:2383801   | X  | 2383801   | 1700  | 3  | 1.47E-07 | 0.673  | 8  | 0.4706 |                      |                                |
| DMRX:11117101  | X  | 11117101  | 200   | 1  | 7.33E-07 | 0.327  | 1  | 0.5    | 5S_rRNA              |                                |
| DMRX:14652501  | X  | 14652501  | 300   | 1  | 7.65E-09 | 11.362 | 2  | 0.6667 |                      |                                |
| DMRX:14951401  | X  | 14951401  | 4200  | 16 | 1.13E-12 | 0.625  | 21 | 0.5    | SNORA26;Slc38a5      | Unknown                        |
| DMRX:18223701  | X  | 18223701  | 1900  | 1  | 8.29E-07 | 0.614  | 21 | 1.1053 |                      |                                |
| DMRX:18891501  | X  | 18891501  | 300   | 1  | 7.43E-09 | 0.457  | 8  | 2.6667 | Klf8                 | Transcription                  |
| DMRX:25932601  | X  | 25932601  | 200   | 1  | 9.80E-07 | 0.346  | 1  | 0.5    |                      |                                |
| DMRX:35089101  | X  | 35089101  | 300   | 1  | 7.88E-07 | 0.538  | 0  | 0      |                      |                                |
| DMRX:35262601  | X  | 35262601  | 3300  | 4  | 1.78E-10 | 0.677  | 18 | 0.5455 |                      |                                |
| DMRX:35266901  | X  | 35266901  | 2700  | 12 | 3.06E-11 | 0.679  | 20 | 0.7407 |                      |                                |
| DMRX:35270701  | X  | 35270701  | 500   | 2  | 4.52E-10 | 0.66   | 2  | 0.4    |                      |                                |
| DMRX:35272601  | X  | 35272601  | 600   | 1  | 9.61E-07 | 0.691  | 15 | 2.5    |                      |                                |
| DMRX:36455401  | X  | 36455401  | 1200  | 2  | 8.42E-08 | 0.881  | 28 | 2.3333 |                      |                                |
| DMRX:49376001  | X  | 49376001  | 300   | 1  | 1.38E-08 | 11.3   | 1  | 0.3333 |                      |                                |
| DMRX:73094101  | X  | 73094101  | 2300  | 3  | 5.79E-15 | 0.59   | 27 | 1.1739 | Rn50_X_0740.2        |                                |
| DMRX:106167001 | X  | 106167001 | 1900  | 7  | 5.43E-09 | 0.661  | 13 | 0.6842 |                      |                                |
| DMRX:106172001 | X  | 106172001 | 2500  | 3  | 2.18E-11 | 0.666  | 12 | 0.48   |                      |                                |
| DMRX:106175701 | X  | 106175701 | 5700  | 12 | 1.10E-10 | 0.67   | 30 | 0.5263 |                      |                                |
| DMRX:109827101 | X  | 109827101 | 200   | 1  | 1.96E-08 | 0.567  | 0  | 0      | Il1rapl2             | Receptor                       |
| DMRX:112386401 | X  | 112386401 | 8200  | 3  | 9.69E-08 | 0.587  | 58 | 0.7073 | Atg4a                | Metabolism                     |
| DMRX:120821201 | X  | 120821201 | 200   | 2  | 6.32E-10 | 0.41   | 5  | 2.5    |                      |                                |
| DMRX:140094601 | X  | 140094601 | 2200  | 1  | 8.35E-07 | 2.843  | 22 | 1      |                      |                                |
| DMRX:150002401 | X  | 150002401 | 200   | 1  | 1.80E-07 | 3.731  | 2  | 1      |                      |                                |
| DMRX:150165301 | X  | 150165301 | 400   | 1  | 1.63E-07 | 5.677  | 0  | 0      |                      |                                |
| DMRX:150557901 | X  | 150557901 | 500   | 1  | 4.95E-07 | 2.62   | 4  | 0.8    |                      |                                |

|                |   |           |      |   |          |       |     |        |             |               |
|----------------|---|-----------|------|---|----------|-------|-----|--------|-------------|---------------|
| DMRX:153076201 | X | 153076201 | 300  | 1 | 2.80E-07 | 0.294 | 3   | 1      | Pnma3;Xlr4a |               |
| DMRX:154665601 | X | 154665601 | 300  | 1 | 3.32E-07 | 0.376 | 6   | 2      |             |               |
| DMRX:155840101 | X | 155840101 | 4200 | 2 | 4.10E-08 | 0.559 | 102 | 2.4286 | Dkc1        | Transcription |
| DMRX:157278701 | X | 157278701 | 200  | 1 | 1.35E-07 | 0.285 | 12  | 6      | Atp2b3      | Transport     |

Supplemental Table S3

(A) DMR Site Table Vinclozolin Prostate Epithelial Epi Str Overlap ( $p < 1e-06$ )

| DMR Name       | Chr | Start     | Length | #<br>SigWin | Min P-<br>value | CpG # | CpG Density | Gene Annotation   | Gene Category        |
|----------------|-----|-----------|--------|-------------|-----------------|-------|-------------|-------------------|----------------------|
| DMR1:5738301   | 1   | 5738301   | 200    | 2           | 3.26E-15        | 0     | 0           | SNORA17           |                      |
| DMR1:22736601  | 1   | 22736601  | 400    | 1           | 2.19E-19        | 2     | 0.5         | Slc18b1           |                      |
| DMR1:179687901 | 1   | 179687901 | 2500   | 2           | 2.76E-07        | 38    | 1.52        |                   |                      |
| DMR1:180242101 | 1   | 180242101 | 2300   | 1           | 4.83E-09        | 36    | 1.565217391 |                   |                      |
| DMR1:263684201 | 1   | 263684201 | 900    | 1           | 1.88E-07        | 1     | 0.111111111 | Dnmbp             | EST                  |
| DMR1:280046301 | 1   | 280046301 | 700    | 1           | 1.44E-08        | 0     | 0           |                   |                      |
| DMR10:5412401  | 10  | 5412401   | 200    | 1           | 4.24E-09        | 0     | 0           |                   |                      |
| DMR12:1341101  | 12  | 1341101   | 600    | 1           | 7.56E-07        | 6     | 1           |                   |                      |
| DMR12:8137201  | 12  | 8137201   | 200    | 1           | 4.01E-10        | 2     | 1           | Mtus2             | Cytoskeleton         |
| DMR12:11273501 | 12  | 11273501  | 400    | 2           | 7.05E-11        | 9     | 2.25        | Arpc1b;Arpc1a     | Cytoskeleton         |
| DMR12:12601401 | 12  | 12601401  | 1000   | 1           | 4.86E-11        | 4     | 0.4         |                   |                      |
| DMR12:50526701 | 12  | 50526701  | 900    | 4           | 4.00E-13        | 9     | 1           |                   |                      |
| DMR12:50774501 | 12  | 50774501  | 2900   | 2           | 8.59E-08        | 47    | 1.620689655 |                   |                      |
| DMR13:19657901 | 13  | 19657901  | 2500   | 3           | 2.55E-08        | 38    | 1.52        |                   |                      |
| DMR13:70572601 | 13  | 70572601  | 1800   | 1           | 6.87E-09        | 20    | 1.111111111 | Lamc2             | Cytoskeleton         |
| DMR13:75608801 | 13  | 75608801  | 200    | 1           | 1.35E-07        | 0     | 0           |                   |                      |
| DMR15:23010301 | 15  | 23010301  | 3900   | 3           | 1.94E-08        | 79    | 2.025641026 |                   |                      |
| DMR15:23024501 | 15  | 23024501  | 1100   | 2           | 2.03E-10        | 15    | 1.363636364 |                   |                      |
| DMR15:40212401 | 15  | 40212401  | 1000   | 1           | 7.67E-07        | 2     | 0.2         | Atp8a2            | Transport            |
| DMR16:30801501 | 16  | 30801501  | 2000   | 1           | 9.07E-07        | 22    | 1.1         |                   |                      |
| DMR17:82084601 | 17  | 82084601  | 1200   | 1           | 1.37E-07        | 22    | 1.833333333 | Arl5b             | Translation          |
| DMR18:79438201 | 18  | 79438201  | 1100   | 1           | 2.24E-07        | 10    | 0.909090909 | Mbp               | Unknown              |
| DMR18:80608001 | 18  | 80608001  | 2500   | 1           | 7.77E-10        | 71    | 2.84        |                   |                      |
| DMR18:87797401 | 18  | 87797401  | 900    | 1           | 9.01E-12        | 9     | 1           |                   |                      |
| DMR19:14401801 | 19  | 14401801  | 100    | 1           | 3.01E-09        | 2     | 2           | Tom1              | Signaling            |
| DMR19:15937901 | 19  | 15937901  | 400    | 1           | 2.49E-08        | 0     | 0           |                   |                      |
| DMR19:38934801 | 19  | 38934801  | 700    | 3           | 2.18E-13        | 3     | 0.428571429 | Tango6            |                      |
| DMR2:161037301 | 2   | 161037301 | 700    | 2           | 3.55E-11        | 11    | 1.571428571 |                   |                      |
| DMR2:226852901 | 2   | 226852901 | 1400   | 1           | 6.20E-08        | 5     | 0.357142857 |                   |                      |
| DMR20:45007301 | 20  | 45007301  | 200    | 1           | 3.41E-09        | 1     | 0.5         | Mfsd4b;RGD1304770 |                      |
| DMR3:23694201  | 3   | 23694201  | 200    | 2           | 7.25E-15        | 2     | 1           |                   |                      |
| DMR3:159097301 | 3   | 159097301 | 500    | 1           | 2.82E-09        | 10    | 2           | LOC103694889      |                      |
| DMR4:77401101  | 4   | 77401101  | 11200  | 1           | 1.10E-08        | 368   | 3.285714286 | AABR07060519.1    |                      |
| DMR4:158928401 | 4   | 158928401 | 600    | 2           | 2.53E-10        | 5     | 0.833333333 |                   |                      |
| DMR4:173488601 | 4   | 173488601 | 300    | 3           | 4.62E-13        | 9     | 3           |                   |                      |
| DMR5:121133101 | 5   | 121133101 | 3000   | 1           | 6.67E-07        | 72    | 2.4         |                   |                      |
| DMR5:138699301 | 5   | 138699301 | 2700   | 1           | 6.51E-07        | 15    | 0.555555556 | Guca2b            | Signaling            |
| DMR6:31062601  | 6   | 31062601  | 9300   | 2           | 3.77E-08        | 169   | 1.817204301 |                   |                      |
| DMR6:134504101 | 6   | 134504101 | 1100   | 2           | 3.28E-09        | 26    | 2.363636364 |                   |                      |
| DMR7:119494001 | 7   | 119494001 | 900    | 1           | 3.38E-07        | 4     | 0.444444444 | Ncf4              | Development          |
| DMR7:121631101 | 7   | 121631101 | 200    | 2           | 1.59E-08        | 6     | 3           |                   |                      |
| DMR8:8224501   | 8   | 8224501   | 300    | 1           | 2.88E-07        | 10    | 3.333333333 | Cntn5             | Extracellular Matrix |
| DMR8:10628701  | 8   | 10628701  | 900    | 1           | 1.15E-07        | 8     | 0.888888889 |                   |                      |
| DMR8:12109201  | 8   | 12109201  | 800    | 1           | 1.46E-07        | 2     | 0.25        | Maml2             | Transcription        |
| DMR8:14259101  | 8   | 14259101  | 600    | 2           | 8.22E-13        | 26    | 4.333333333 | Slc36a4           | Transport            |
| DMR8:88267801  | 8   | 88267801  | 400    | 1           | 3.59E-07        | 3     | 0.75        |                   |                      |
| DMR8:127473901 | 8   | 127473901 | 1100   | 3           | 2.12E-07        | 1     | 0.090909091 | Itga9             | Extracellular Matrix |
| DMR9:10507301  | 9   | 10507301  | 400    | 1           | 9.67E-07        | 1     | 0.25        |                   |                      |
| DMRX:36455601  | X   | 36455601  | 800    | 2           | 5.86E-08        | 17    | 2.125       |                   |                      |

**(B) DMR Site Table Vinclozolin Prostate Stromal Epi Str Overlap (p<1e-06)**

| DMR Name       | Chr | Start     | Length | # Sig Win | Min P-value | CpG # | CpG Density | Gene Annotation   | Gene Category        |
|----------------|-----|-----------|--------|-----------|-------------|-------|-------------|-------------------|----------------------|
| DMR1:5738301   | 1   | 5738301   | 100    | 1         | 1.41E-17    | 0     | 0           | SNORA17           |                      |
| DMR1:22736501  | 1   | 22736501  | 300    | 1         | 8.68E-16    | 0     | 0           | Slc18b1           |                      |
| DMR1:179687901 | 1   | 179687901 | 3700   | 4         | 1.80E-08    | 43    | 1.162162162 |                   |                      |
| DMR1:180242001 | 1   | 180242001 | 2300   | 1         | 1.02E-12    | 36    | 1.565217391 |                   |                      |
| DMR1:263684301 | 1   | 263684301 | 800    | 1         | 5.25E-07    | 0     | 0           | Dnmbp             | EST                  |
| DMR1:280046301 | 1   | 280046301 | 900    | 1         | 2.52E-07    | 0     | 0           |                   |                      |
| DMR10:5412401  | 10  | 5412401   | 300    | 1         | 1.42E-09    | 0     | 0           |                   |                      |
| DMR12:1341101  | 12  | 1341101   | 400    | 1         | 5.32E-07    | 2     | 0.5         |                   |                      |
| DMR12:8137201  | 12  | 8137201   | 200    | 1         | 9.70E-08    | 2     |             | Mtus2             | Cytoskeleton         |
| DMR12:11273601 | 12  | 11273601  | 300    | 2         | 1.36E-11    | 5     | 1.666666667 | Arpc1b;Arpc1a     | Cytoskeleton         |
| DMR12:12600801 | 12  | 12600801  | 1500   | 2         | 4.73E-12    | 16    | 1.066666667 |                   |                      |
| DMR12:50526801 | 12  | 50526801  | 1900   | 4         | 2.49E-13    | 24    | 1.263157895 |                   |                      |
| DMR12:50776201 | 12  | 50776201  | 2100   | 3         | 2.28E-12    | 58    | 2.761904762 |                   |                      |
| DMR13:19657901 | 13  | 19657901  | 3800   | 1         | 1.81E-08    | 44    | 1.157894737 |                   |                      |
| DMR13:70572701 | 13  | 70572701  | 1600   | 3         | 3.14E-15    | 20    | 1.25        | Lamc2             | Cytoskeleton         |
| DMR13:75608801 | 13  | 75608801  | 200    | 1         | 9.50E-07    | 0     | 0           |                   |                      |
| DMR15:23010401 | 15  | 23010401  | 1700   | 1         | 3.16E-07    | 33    | 1.941176471 |                   |                      |
| DMR15:23013301 | 15  | 23013301  | 900    | 2         | 4.58E-07    | 8     | 0.888888889 |                   |                      |
| DMR15:23021801 | 15  | 23021801  | 3800   | 1         | 9.67E-08    | 79    | 2.078947368 |                   |                      |
| DMR15:40212101 | 15  | 40212101  | 1500   | 2         | 2.40E-09    | 2     | 0.133333333 | Atp8a2            | Transport            |
| DMR16:30802301 | 16  | 30802301  | 2000   | 1         | 5.21E-07    | 21    | 1.05        |                   |                      |
| DMR17:82084501 | 17  | 82084501  | 400    | 2         | 2.37E-11    | 1     | 0.25        | Arl5b             | Translation          |
| DMR18:79438101 | 18  | 79438101  | 2700   | 3         | 1.04E-08    | 28    | 1.037037037 | Mbp               | Unknown              |
| DMR18:80608901 | 18  | 80608901  | 3200   | 1         | 2.19E-11    | 88    | 2.75        |                   |                      |
| DMR18:87797401 | 18  | 87797401  | 1300   | 2         | 4.93E-11    | 24    | 1.846153846 |                   |                      |
| DMR19:14401801 | 19  | 14401801  | 100    | 1         | 1.30E-17    | 2     | 2           | Tom1              | Signaling            |
| DMR19:15937901 | 19  | 15937901  | 600    | 1         | 2.60E-10    | 3     | 0.5         |                   |                      |
| DMR19:38934801 | 19  | 38934801  | 600    | 3         | 3.87E-10    | 3     | 0.5         | Tango6            |                      |
| DMR2:161037401 | 2   | 161037401 | 1900   | 2         | 3.97E-07    | 27    | 1.421052632 |                   |                      |
| DMR2:226853001 | 2   | 226853001 | 500    | 2         | 9.19E-09    | 0     | 0           |                   |                      |
| DMR20:45007301 | 20  | 45007301  | 200    | 1         | 2.09E-09    | 1     | 0.5         | Mfsd4b;RGD1304770 |                      |
| DMR3:23694201  | 3   | 23694201  | 200    | 2         | 1.05E-13    | 2     | 1           |                   |                      |
| DMR3:159097301 | 3   | 159097301 | 500    | 3         | 4.47E-10    | 10    | 2           | LOC103694889      |                      |
| DMR4:77399901  | 4   | 77399901  | 12400  | 14        | 1.01E-11    | 376   | 3.032258065 | AABR07060519.1    |                      |
| DMR4:158928301 | 4   | 158928301 | 800    | 1         | 3.58E-08    | 6     | 0.75        |                   |                      |
| DMR4:173488701 | 4   | 173488701 | 200    | 2         | 2.69E-17    | 5     | 2.5         |                   |                      |
| DMR5:121133301 | 5   | 121133301 | 2800   | 1         | 8.05E-07    | 68    | 2.428571429 |                   |                      |
| DMR5:138699301 | 5   | 138699301 | 1700   | 2         | 6.60E-11    | 1     | 0.058823529 | Guca2b            | Signaling            |
| DMR6:31062801  | 6   | 31062801  | 7100   | 1         | 6.96E-07    | 135   | 1.901408451 |                   |                      |
| DMR6:134502801 | 6   | 134502801 | 2300   | 1         | 2.34E-07    | 61    | 2.652173913 |                   |                      |
| DMR7:119494001 | 7   | 119494001 | 1000   | 2         | 2.18E-10    | 6     | 0.6         | Ncf4              | Development          |
| DMR7:121631101 | 7   | 121631101 | 200    | 2         | 2.54E-13    | 6     | 3           |                   |                      |
| DMR8:8224501   | 8   | 8224501   | 300    | 1         | 6.37E-07    | 10    | 3.333333333 | Cntn5             | Extracellular Matrix |
| DMR8:10626201  | 8   | 10626201  | 3500   | 1         | 5.07E-08    | 41    | 1.171428571 |                   |                      |
| DMR8:12109101  | 8   | 12109101  | 900    | 1         | 7.46E-07    | 4     | 0.444444444 | Maml2             | Transcription        |
| DMR8:14259101  | 8   | 14259101  | 600    | 3         | 1.10E-22    | 26    | 4.333333333 | Slc36a4           | Transport            |
| DMR8:88267801  | 8   | 88267801  | 600    | 1         | 1.02E-09    | 3     | 0.5         |                   |                      |
| DMR8:127473901 | 8   | 127473901 | 1100   | 1         | 1.95E-07    | 1     | 0.090909091 | Itga9             | Extracellular Matrix |
| DMR9:10507301  | 9   | 10507301  | 500    | 3         | 8.34E-19    | 2     | 0.4         |                   |                      |
| DMRX:36455401  | X   | 36455401  | 1200   | 2         | 8.42E-08    | 28    | 2.333333333 |                   |                      |

**Supplemental Table S4**

**Site Table sncRNA Prostate Epithelial (p<0.001)**

| id                           | Chr | Start     | log2FoldChange | pvalue   | padj     |
|------------------------------|-----|-----------|----------------|----------|----------|
| rno-miR-450a-3p:MIMAT0017183 | X   | 158589811 | 3.32           | 5.50E-04 | 1.45E-02 |
| rno-miR-450b-5p:MIMAT0035746 | X   | 158589644 | 1.78           | 1.31E-05 | 9.41E-04 |
| rno-miR-503-5p:MIMAT0003213  | X   | 158584862 | 3.37           | 1.89E-14 | 6.53E-11 |
| rno-miR-322-3p:MIMAT0000547  | X   | 158584602 | 2.66           | 1.39E-10 | 1.59E-07 |
| rno-miR-201-5p:MIMAT0012846  | X   | 155339151 | -2.45          | 3.45E-04 | 1.09E-02 |
| rno-miR-135b-5p:MIMAT0000611 | 13  | 48977001  | -5.55          | 9.55E-05 | 4.57E-03 |
| rno-miR-503-3p:MIMAT0017224  | X   | 158148521 | 2.05           | 2.15E-04 | 8.23E-03 |
| rno-miR-322-5p:MIMAT0001619  | X   | 158584564 | 2              | 1.45E-06 | 2.28E-04 |
| rno-miR-202-5p:MIMAT0012822  | 1   | 212295675 | -1.68          | 1.70E-04 | 7.00E-03 |
| rno-miR-450b-3p:MIMAT0035747 | X   | 158153296 | 3.67           | 4.72E-06 | 4.52E-04 |
| rno-miR-547-3p:MIMAT0012851  | X   | 155338889 | -3.22          | 6.47E-08 | 2.79E-05 |
| rno-miR-129-5p:MIMAT0000600  | 4   | 56301731  | -4.54          | 6.79E-04 | 1.66E-02 |
| rno-miR-450a-5p:MIMAT0001547 | X   | 158153394 | 1.99           | 2.89E-06 | 3.44E-04 |
| rno-miR-201-3p:MIMAT0017364  | X   | 155339186 | -3.83          | 8.05E-06 | 6.78E-04 |
| rno-miR-351-5p:MIMAT0000608  | X   | 158149221 | 2.36           | 2.81E-07 | 7.46E-05 |
| piR-rno-220                  | 3   | 120268801 | -6.49          | 1.08E-05 | 8.69E-04 |
| piR-rno-372                  | 5   | 78076115  | -5.63          | 6.03E-04 | 1.54E-02 |
| piR-rno-451                  | 20  | 6680118   | -6.55          | 1.20E-05 | 9.27E-04 |
| piR-rno-623                  | 1   | 135182573 | -6.64          | 8.06E-06 | 6.78E-04 |
| piR-rno-1013                 | 20  | 6662285   | -5.6           | 9.91E-04 | 2.08E-02 |
| piR-rno-1195                 | 20  | 6651490   | -6.07          | 8.64E-05 | 4.26E-03 |
| piR-rno-1709                 | 20  | 6648907   | -5.37          | 1.86E-04 | 7.37E-03 |
| piR-rno-1833                 | 20  | 6630280   | -5.33          | 4.39E-04 | 1.26E-02 |
| piR-rno-1938                 | 20  | 6684687   | -5.82          | 2.68E-04 | 9.07E-03 |
| piR-rno-1949                 | 15  | 245749    | -5.11          | 7.15E-04 | 1.73E-02 |
| piR-rno-2490                 | 3   | 146945235 | -6.17          | 5.57E-05 | 2.78E-03 |
| piR-rno-3102                 | 20  | 6634461   | -5.31          | 3.79E-04 | 1.16E-02 |
| piR-rno-3337                 | 20  | 6639763   | -6.63          | 4.45E-06 | 4.39E-04 |
| piR-rno-3623                 | 20  | 6680109   | -6.21          | 4.64E-05 | 2.42E-03 |
| piR-rno-3686                 | 1   | 131021248 | -6.26          | 4.20E-05 | 2.30E-03 |
| piR-rno-3988                 | 6   | 122382919 | -8.24          | 3.93E-10 | 3.10E-07 |
| piR-rno-4043                 | 1   | 135146666 | -5.88          | 2.31E-04 | 8.32E-03 |
| piR-rno-4065                 | 11  | 87120655  | -5.79          | 3.63E-04 | 1.12E-02 |
| piR-rno-4301                 | 20  | 6660191   | -6.96          | 8.40E-07 | 1.53E-04 |
| piR-rno-5960                 | 20  | 6653039   | -5.15          | 5.09E-04 | 1.39E-02 |
| piR-rno-5970                 | 20  | 6639416   | -5.53          | 9.70E-04 | 2.07E-02 |
| piR-rno-6124                 | 20  | 6643420   | -5.69          | 4.47E-04 | 1.28E-02 |
| piR-rno-6623                 | 15  | 276897    | -6.11          | 1.17E-04 | 5.46E-03 |
| piR-rno-6676                 | 20  | 6626739   | -6.35          | 2.14E-05 | 1.34E-03 |
| piR-rno-6777                 | 20  | 6679528   | -7.47          | 4.12E-08 | 2.03E-05 |

|               |    |           |       |          |          |
|---------------|----|-----------|-------|----------|----------|
| piR-rno-6999  | 20 | 6634562   | -5.54 | 9.98E-04 | 2.08E-02 |
| piR-rno-7000  | 4  | 160380812 | -6.43 | 1.48E-05 | 1.02E-03 |
| piR-rno-7161  | 1  | 135146667 | -5.77 | 4.16E-04 | 1.23E-02 |
| piR-rno-7819  | 20 | 6623847   | -6.85 | 2.73E-06 | 3.37E-04 |
| piR-rno-7850  | 20 | 6651613   | -5.56 | 8.39E-04 | 1.88E-02 |
| piR-rno-8155  | 20 | 6645194   | -5.6  | 7.41E-04 | 1.73E-02 |
| piR-rno-8940  | 20 | 6680121   | -7.6  | 2.73E-08 | 1.57E-05 |
| piR-rno-9032  | 15 | 245751    | -5.56 | 7.55E-04 | 1.73E-02 |
| piR-rno-9247  | 1  | 54889999  | -5.59 | 9.33E-04 | 2.01E-02 |
| piR-rno-9474  | 20 | 6630799   | -5.63 | 5.82E-04 | 1.50E-02 |
| piR-rno-9804  | X  | 155338889 | -2.5  | 1.24E-05 | 9.27E-04 |
| piR-rno-9874  | 20 | 6655630   | -5.79 | 4.69E-04 | 1.32E-02 |
| piR-rno-9899  | NA | NA        | -6.94 | 1.70E-06 | 2.49E-04 |
| piR-rno-10003 | 20 | 6631677   | -5.5  | 9.79E-04 | 2.07E-02 |
| piR-rno-10535 | 20 | 6653153   | -5.73 | 4.33E-04 | 1.26E-02 |
| piR-rno-10554 | 12 | 49067299  | -5.15 | 6.12E-04 | 1.55E-02 |
| piR-rno-10929 | 20 | 6652053   | -9.04 | 3.13E-12 | 5.39E-09 |
| piR-rno-10962 | 20 | 6642039   | -5.53 | 8.91E-04 | 1.95E-02 |
| piR-rno-10980 | 20 | 6626741   | -6.05 | 1.43E-04 | 6.30E-03 |
| piR-rno-11689 | 20 | 6642860   | -5.82 | 3.23E-04 | 1.04E-02 |
| piR-rno-12125 | NA | NA        | -5.74 | 4.07E-04 | 1.21E-02 |
| piR-rno-12143 | 20 | 6660023   | -6.05 | 1.28E-04 | 5.82E-03 |
| piR-rno-12297 | 20 | 6654839   | -5.95 | 1.56E-04 | 6.64E-03 |
| piR-rno-12739 | 20 | 6680786   | -6.59 | 6.37E-06 | 5.63E-04 |
| piR-rno-13064 | 4  | 117651976 | -6.6  | 5.81E-06 | 5.28E-04 |
| piR-rno-13457 | 20 | 6653039   | -5.58 | 7.86E-04 | 1.77E-02 |
| piR-rno-13695 | 8  | 73555829  | -5.61 | 7.58E-04 | 1.73E-02 |
| piR-rno-14106 | 5  | 153978738 | -4.67 | 7.50E-04 | 1.73E-02 |
| piR-rno-14184 | 20 | 6662987   | -7.23 | 4.66E-07 | 1.00E-04 |
| piR-rno-14382 | X  | 107054233 | -6.41 | 1.83E-05 | 1.17E-03 |
| piR-rno-14406 | 20 | 6669159   | -4.21 | 2.23E-04 | 8.23E-03 |
| piR-rno-14617 | 20 | 6623914   | -6.65 | 4.34E-06 | 4.39E-04 |
| piR-rno-14798 | X  | 107054233 | -5.3  | 2.75E-04 | 9.21E-03 |
| piR-rno-14879 | 3  | 120268801 | -5.69 | 5.28E-04 | 1.41E-02 |
| piR-rno-14881 | 7  | 99560734  | -6.01 | 1.35E-04 | 6.05E-03 |
| piR-rno-15105 | X  | 151274374 | -1.63 | 6.76E-04 | 1.66E-02 |
| piR-rno-15550 | X  | 155330302 | -3.12 | 1.63E-04 | 6.75E-03 |
| piR-rno-15619 | 20 | 6668525   | -6.84 | 2.59E-06 | 3.31E-04 |
| piR-rno-15683 | 12 | 6521839   | -6.33 | 3.33E-05 | 1.98E-03 |
| piR-rno-15704 | 20 | 6672989   | -5.19 | 1.49E-07 | 5.15E-05 |
| piR-rno-16346 | 20 | 6642863   | -6.72 | 3.22E-06 | 3.70E-04 |
| piR-rno-16585 | 20 | 6680101   | -6.9  | 2.35E-06 | 3.24E-04 |
| piR-rno-16699 | 20 | 6676695   | -5.74 | 4.07E-04 | 1.21E-02 |

|               |    |           |       |          |          |
|---------------|----|-----------|-------|----------|----------|
| piR-rno-16818 | 20 | 6635475   | -7.11 | 4.31E-07 | 9.92E-05 |
| piR-rno-17331 | 8  | 73566343  | -6.05 | 1.19E-04 | 5.46E-03 |
| piR-rno-17387 | 20 | 6679199   | -6.85 | 1.74E-06 | 2.49E-04 |
| piR-rno-17402 | 10 | 91522069  | -5.83 | 2.34E-04 | 8.32E-03 |
| piR-rno-17998 | 20 | 6668528   | -7.11 | 3.31E-07 | 8.14E-05 |
| piR-rno-18085 | 18 | 60914182  | -5.8  | 3.93E-04 | 1.19E-02 |
| piR-rno-18254 | 20 | 6623524   | -5.81 | 3.58E-04 | 1.11E-02 |
| piR-rno-19037 | 20 | 6651886   | -5.67 | 6.17E-04 | 1.55E-02 |
| piR-rno-19617 | 7  | 119885479 | -6.26 | 5.39E-05 | 2.73E-03 |
| piR-rno-20568 | 20 | 6651884   | -5.95 | 1.65E-05 | 1.10E-03 |
| piR-rno-21165 | 20 | 6680490   | -5.91 | 2.54E-04 | 8.92E-03 |
| piR-rno-21623 | 20 | 6632039   | -7.02 | 5.21E-07 | 1.06E-04 |
| piR-rno-22267 | 20 | 6659331   | -6.07 | 8.98E-06 | 7.37E-04 |
| piR-rno-22887 | 20 | 6632151   | -5.7  | 5.29E-04 | 1.41E-02 |
| piR-rno-22906 | 20 | 6622830   | -6.05 | 1.47E-04 | 6.37E-03 |
| piR-rno-22908 | 20 | 6623920   | -5.9  | 2.01E-04 | 7.89E-03 |
| piR-rno-23207 | 20 | 6635476   | -5.95 | 1.79E-04 | 7.25E-03 |
| piR-rno-23823 | 20 | 6638130   | -5.72 | 5.01E-05 | 2.58E-03 |
| piR-rno-24292 | 20 | 6636383   | -5.61 | 7.58E-04 | 1.73E-02 |
| piR-rno-24907 | 20 | 6676886   | -5.26 | 3.24E-04 | 1.04E-02 |
| piR-rno-25584 | 20 | 6678933   | -5.92 | 2.66E-04 | 9.07E-03 |
| piR-rno-25698 | 20 | 6637849   | -5.91 | 3.47E-04 | 1.09E-02 |
| piR-rno-25913 | 20 | 6630085   | -5.55 | 8.48E-04 | 1.89E-02 |
| piR-rno-26293 | 4  | 160352079 | -5.66 | 5.31E-04 | 1.41E-02 |
| piR-rno-26309 | 20 | 6680341   | -6.17 | 1.10E-04 | 5.19E-03 |
| piR-rno-26408 | 20 | 6675345   | -6.22 | 4.60E-05 | 2.42E-03 |
| piR-rno-26467 | 20 | 6630259   | -7.01 | 4.30E-04 | 1.26E-02 |
| piR-rno-26564 | 20 | 6627709   | -5.84 | 2.56E-04 | 8.92E-03 |
| piR-rno-27441 | 20 | 6630414   | -5.37 | 2.86E-04 | 9.47E-03 |
| piR-rno-27656 | 3  | 81482722  | -6.47 | 1.26E-05 | 9.27E-04 |
| piR-rno-27796 | 15 | 245746    | -6.11 | 5.54E-06 | 5.16E-04 |
| piR-rno-27923 | 9  | 114168972 | -5.56 | 8.66E-04 | 1.92E-02 |
| piR-rno-27989 | 1  | 135182573 | -5.59 | 7.30E-04 | 1.73E-02 |
| piR-rno-28264 | 20 | 6627707   | -7.19 | 2.73E-07 | 7.46E-05 |
| piR-rno-28549 | 20 | 6672641   | -6.5  | 1.43E-05 | 1.01E-03 |
| piR-rno-29588 | 20 | 6644630   | -5.66 | 5.05E-04 | 1.39E-02 |
| piR-rno-29714 | 7  | 99563060  | -5.64 | 7.04E-04 | 1.71E-02 |
| piR-rno-29849 | 1  | 134436389 | -5.04 | 7.48E-04 | 1.73E-02 |
| piR-rno-29859 | 20 | 6653567   | -5.52 | 9.76E-04 | 2.07E-02 |
| piR-rno-29885 | 20 | 6674880   | -6.4  | 1.70E-05 | 1.10E-03 |
| piR-rno-30402 | 5  | 91131795  | 1.83  | 1.16E-06 | 2.00E-04 |
| piR-rno-31427 | 6  | 122382879 | -6.07 | 8.82E-05 | 4.29E-03 |
| piR-rno-31568 | 4  | 160354342 | -5.78 | 4.63E-04 | 1.31E-02 |



|               |    |           |       |          |          |
|---------------|----|-----------|-------|----------|----------|
| piR-rno-31788 | 20 | 6631493   | -5.6  | 7.44E-04 | 1.73E-02 |
| piR-rno-31810 | X  | 155339186 | -4.88 | 2.24E-07 | 7.03E-05 |
| piR-rno-32475 | 3  | 81472305  | -5.7  | 4.95E-04 | 1.38E-02 |
| piR-rno-32845 | 20 | 6664106   | -5.57 | 9.11E-04 | 1.98E-02 |
| piR-rno-33223 | 15 | 245748    | -6.23 | 3.88E-05 | 2.23E-03 |
| piR-rno-33464 | 1  | 135195735 | -5.59 | 6.61E-04 | 1.64E-02 |
| piR-rno-34239 | 3  | 81476825  | -6.4  | 1.70E-05 | 1.10E-03 |
| piR-rno-34653 | 20 | 6628538   | -5.27 | 3.08E-04 | 1.01E-02 |
| piR-rno-34667 | 20 | 6671547   | -6.29 | 2.50E-06 | 3.31E-04 |
| piR-rno-36144 | X  | 155338889 | -2.8  | 3.62E-06 | 3.91E-04 |
| piR-rno-36179 | 20 | 6676627   | -7.35 | 4.49E-10 | 3.10E-07 |
| piR-rno-36660 | 1  | 131021292 | -5.59 | 8.89E-04 | 1.95E-02 |
| piR-rno-37046 | 20 | 6680490   | -6.67 | 4.01E-06 | 4.19E-04 |
| piR-rno-38236 | 20 | 6680786   | -6.26 | 4.61E-05 | 2.42E-03 |
| piR-rno-40563 | 1  | 131025168 | -5.56 | 7.66E-04 | 1.74E-02 |
| piR-rno-41278 | NA | NA        | -5.45 | 2.22E-04 | 8.23E-03 |
| piR-rno-41664 | 11 | 81378400  | -1.83 | 1.62E-04 | 6.75E-03 |
| piR-rno-44184 | 4  | 117830858 | -5.61 | 6.25E-04 | 1.56E-02 |
| piR-rno-45634 | NA | NA        | -5.86 | 2.66E-04 | 9.07E-03 |
| piR-rno-45755 | 20 | 6673141   | -6.31 | 2.92E-05 | 1.77E-03 |
| piR-rno-50608 | 12 | 6521838   | -6.29 | 4.01E-05 | 2.25E-03 |
| piR-rno-50675 | NA | NA        | -6.28 | 3.54E-05 | 2.07E-03 |
| piR-rno-53124 | NA | NA        | -5.67 | 5.64E-04 | 1.47E-02 |
| piR-rno-54005 | 5  | 78078495  | -6    | 2.10E-04 | 8.13E-03 |
| piR-rno-54090 | 20 | 6669070   | -6.36 | 2.22E-05 | 1.37E-03 |
| piR-rno-54872 | NA | NA        | -5.11 | 5.74E-04 | 1.49E-02 |
| piR-rno-55529 | 7  | 99564978  | -7.06 | 7.02E-07 | 1.35E-04 |
| piR-rno-56024 | 20 | 6647108   | -6.92 | 1.36E-06 | 2.24E-04 |
| piR-rno-56843 | 6  | 122382920 | -6.31 | 8.52E-08 | 3.27E-05 |
| piR-rno-57230 | 20 | 6680110   | -5.75 | 3.41E-04 | 1.09E-02 |
| piR-rno-57549 | NA | NA        | -5.69 | 5.22E-04 | 1.41E-02 |
| piR-rno-57625 | 18 | 60904360  | -5.35 | 2.24E-04 | 8.23E-03 |
| piR-rno-60510 | 20 | 6673738   | -5.98 | 1.48E-04 | 6.37E-03 |
| piR-rno-61093 | NA | NA        | -5.89 | 1.81E-04 | 7.25E-03 |
| piR-rno-61203 | 1  | 109521611 | -5.71 | 4.04E-05 | 2.25E-03 |
| piR-rno-62794 | 5  | 129142658 | 1.93  | 2.32E-04 | 8.32E-03 |
| piR-rno-62997 | 10 | 65291234  | -2.51 | 2.23E-04 | 8.23E-03 |
| piR-rno-63055 | X  | 158153394 | 1.87  | 1.26E-05 | 9.27E-04 |
| piR-rno-63080 | X  | 158584564 | 2     | 3.38E-06 | 3.76E-04 |

**Supplemental Table S5**

**Site Table sncRNA Prostate Stromal (p<0.001)**

| id                                                | Chr | Start     | log2FoldChange | pvalue   | padj     |
|---------------------------------------------------|-----|-----------|----------------|----------|----------|
| rno-miR-204-3p:MIMAT0004739                       | 1   | 240403071 | 3.15           | 3.45E-04 | 2.30E-02 |
| rno-miR-136-5p:MIMAT0000842                       | 6   | 133716775 | 2.6            | 3.09E-04 | 2.25E-02 |
| rno-miR-3473:MIMAT0024853                         | 10  | 75205084  | 3.2            | 4.95E-05 | 6.62E-03 |
| rno-miR-342-5p:MIMAT0004652                       | 6   | 132561187 | 2.26           | 9.17E-04 | 4.20E-02 |
| Rattus_norvegicus_chr17.trna1606-AlaAGC:(45815808 | 17  | 43962065  | -3.12          | 1.17E-06 | 3.56E-04 |
| Rattus_norvegicus_chr1.trna6805-AlaAGC:(225683168 | 1   | 218810648 | -3.09          | 3.61E-04 | 2.32E-02 |
| Rattus_norvegicus_chr17.trna3936-AlaAGC:(45793269 | 17  | 43938525  | -3.22          | 3.30E-04 | 2.25E-02 |
| Rattus_norvegicus_chr2.trna2176-AlaAGC:(124127980 | 2   | 104404891 | -3.07          | 2.69E-06 | 7.48E-04 |
| Rattus_norvegicus_chr6.trna7740-AlaAGC:(36671663- | 2   | 104404891 | -2.3           | 1.96E-04 | 1.72E-02 |
| Rattus_norvegicus_chr4.trna1517-ArgCCT:(66087628- | 4   | 66276179  | -1.66          | 9.77E-04 | 4.30E-02 |
| Rattus_norvegicus_chr10.trna13306-ArgCCT:(1269871 | 10  | 12877346  | -3.39          | 2.41E-07 | 1.15E-04 |
| Rattus_norvegicus_chrX.trna1999-ArgCCT:(82600032- | X   | 82631971  | -3.46          | 8.76E-05 | 9.75E-03 |
| Rattus_norvegicus_chr10.trna13315-ArgCCT:(1267121 | 10  | 12849847  | -3.3           | 4.07E-04 | 2.52E-02 |
| Rattus_norvegicus_chr2.trna4358-GlyCCC:(217947735 | 2   | 198461976 | -2.15          | 1.20E-04 | 1.22E-02 |
| Rattus_norvegicus_chr13.trna3830-LeuCAG:(96493702 | 13  | 91978414  | -3.6           | 1.41E-09 | 4.72E-06 |
| Rattus_norvegicus_chrM.trna1-LeuTAA:(2665-2739):: | MT  | 2665      | -2.17          | 2.61E-05 | 4.15E-03 |
| Rattus_norvegicus_chr17.trna1587-SerAGA:(45707665 | 17  | 43851269  | 1.89           | 8.74E-04 | 4.20E-02 |
| Rattus_norvegicus_chr5.trna455-SerAGA:(28086029-2 | 17  | 44674536  | 1.86           | 9.64E-04 | 4.29E-02 |
| piR-rno-220                                       | 3   | 120268801 | -5.98          | 1.19E-04 | 1.22E-02 |
| piR-rno-2490                                      | 3   | 146945235 | -5.61          | 4.88E-04 | 2.72E-02 |
| piR-rno-3102                                      | 20  | 6634461   | -5.72          | 3.17E-04 | 2.25E-02 |
| piR-rno-3686                                      | 1   | 131021248 | -5.48          | 8.82E-04 | 4.20E-02 |
| piR-rno-3988                                      | 6   | 122382919 | -7.49          | 7.33E-08 | 6.85E-05 |
| piR-rno-4301                                      | 20  | 6660191   | -6.5           | 1.05E-05 | 2.18E-03 |
| piR-rno-6777                                      | 20  | 6679528   | -7.21          | 3.61E-07 | 1.51E-04 |
| piR-rno-7819                                      | 20  | 6623847   | -5.75          | 2.91E-04 | 2.25E-02 |
| piR-rno-8940                                      | 20  | 6680121   | -5.73          | 6.26E-05 | 7.75E-03 |
| piR-rno-10929                                     | 20  | 6652053   | -5.67          | 8.61E-08 | 6.85E-05 |
| piR-rno-11689                                     | 20  | 6642860   | -5.56          | 6.65E-04 | 3.32E-02 |
| piR-rno-12189                                     | 20  | 6683531   | -5.59          | 5.38E-04 | 2.81E-02 |
| piR-rno-13064                                     | 4   | 117651976 | -4.62          | 4.88E-04 | 2.72E-02 |
| piR-rno-14184                                     | 20  | 6662987   | -6.06          | 8.12E-05 | 9.68E-03 |
| piR-rno-14406                                     | 20  | 6669159   | -5.94          | 1.30E-04 | 1.28E-02 |
| piR-rno-14617                                     | 20  | 6623914   | -5.15          | 5.25E-04 | 2.81E-02 |
| piR-rno-14798                                     | X   | 107054233 | -5.62          | 5.32E-04 | 2.81E-02 |
| piR-rno-15619                                     | 20  | 6668525   | -5.89          | 1.60E-04 | 1.48E-02 |
| piR-rno-15704                                     | 20  | 6672989   | -6.72          | 3.56E-06 | 8.48E-04 |
| piR-rno-16346                                     | 20  | 6642863   | -6.05          | 8.75E-05 | 9.75E-03 |
| piR-rno-16585                                     | 20  | 6680101   | -5.78          | 2.59E-04 | 2.11E-02 |
| piR-rno-16818                                     | 20  | 6635475   | -6.52          | 1.12E-05 | 2.21E-03 |
| piR-rno-19617                                     | 7   | 119885479 | -5.44          | 9.54E-04 | 4.29E-02 |
| piR-rno-20568                                     | 20  | 6651884   | -6.21          | 4.14E-05 | 6.02E-03 |
| piR-rno-21623                                     | 20  | 6632039   | -6.15          | 5.77E-05 | 7.41E-03 |
| piR-rno-23823                                     | 20  | 6638130   | -5.57          | 5.79E-04 | 2.93E-02 |
| piR-rno-27656                                     | 3   | 81482722  | -5.82          | 2.55E-04 | 2.11E-02 |
| piR-rno-27796                                     | 15  | 245746    | -6.6           | 7.98E-06 | 1.78E-03 |

|                                                   |    |           |       |          |          |
|---------------------------------------------------|----|-----------|-------|----------|----------|
| piR-rno-30402                                     | 5  | 91131795  | 2.45  | 8.23E-07 | 2.75E-04 |
| piR-rno-34667                                     | 20 | 6671547   | -6.76 | 3.21E-06 | 8.24E-04 |
| piR-rno-36179                                     | 20 | 6676627   | -6.81 | 5.31E-07 | 1.97E-04 |
| piR-rno-40536                                     | 10 | 65443464  | -1.74 | 3.97E-04 | 2.50E-02 |
| piR-rno-40648                                     | 2  | 189865693 | -2.07 | 1.88E-04 | 1.70E-02 |
| piR-rno-40649                                     | NA | NA        | -2    | 9.12E-04 | 4.20E-02 |
| piR-rno-41278                                     | NA | NA        | -5.6  | 5.31E-04 | 2.81E-02 |
| piR-rno-41525                                     | 5  | 91134984  | 2.27  | 4.56E-04 | 2.72E-02 |
| piR-rno-41721                                     | 4  | 127537621 | 4.33  | 5.70E-04 | 2.93E-02 |
| piR-rno-41910                                     | 14 | 46646166  | 2.27  | 4.89E-04 | 2.72E-02 |
| piR-rno-50642                                     | NA | NA        | 2.16  | 2.75E-04 | 2.19E-02 |
| piR-rno-50788                                     | NA | NA        | 2.25  | 9.07E-04 | 4.20E-02 |
| piR-rno-54090                                     | 20 | 6669070   | -5.79 | 2.42E-04 | 2.07E-02 |
| piR-rno-55529                                     | 7  | 99564978  | -5.19 | 4.70E-04 | 2.72E-02 |
| piR-rno-56843                                     | 6  | 122382920 | -7.38 | 1.36E-07 | 7.55E-05 |
| piR-rno-61203                                     | 1  | 109521611 | -5.27 | 3.53E-04 | 2.31E-02 |
| piR-rno-62771                                     | 17 | 44660505  | -1.69 | 8.99E-04 | 4.20E-02 |
| piR-rno-62883                                     | 14 | 46646165  | 2.24  | 2.56E-05 | 4.15E-03 |
| piR-rno-62898                                     | 1  | 11970092  | 2.23  | 2.83E-05 | 4.29E-03 |
| piR-rno-62912                                     | 14 | 46646165  | 2.1   | 2.42E-05 | 4.15E-03 |
| piR-rno-63032                                     | 6  | 133716775 | 2.58  | 3.25E-04 | 2.25E-02 |
| ENSRNOT00000088337.1:ncrna:chromosome:Rnor_6.0:10 | 10 | 34151395  | -2.25 | 3.13E-04 | 2.25E-02 |
| ENSRNOT00000081514.1:ncrna:chromosome:Rnor_6.0:1: | 1  | 100222088 | -5.24 | 4.95E-05 | 6.62E-03 |
| ENSRNOT00000086797.1:ncrna:chromosome:Rnor_6.0:2: | 2  | 75154117  | -2.43 | 1.42E-04 | 1.35E-02 |
| ENSRNOT00000077870.1:ncrna:chromosome:Rnor_6.0:6: | 6  | 81835387  | -2.37 | 3.21E-04 | 2.25E-02 |
| ENSRNOT00000091975.1:ncrna:chromosome:Rnor_6.0:1: | 1  | 135581305 | -1.96 | 4.46E-04 | 2.71E-02 |
| ENSRNOT00000045072.3:ncrna:chromosome:Rnor_6.0:MT | MT | 1026      | -1.98 | 9.45E-05 | 1.02E-02 |
| ENSRNOT00000049156.3:ncrna:chromosome:Rnor_6.0:MT | MT | 2665      | -2.17 | 2.11E-05 | 3.91E-03 |
| ENSRNOT00000051008.3:ncrna:chromosome:Rnor_6.0:MT | MT | 3695      | -3.08 | 1.02E-07 | 6.85E-05 |
| ENSRNOT00000044639.3:ncrna:chromosome:Rnor_6.0:MT | MT | 15348     | -3.5  | 4.17E-08 | 6.85E-05 |

**Supplemental Table S6****Site Table sncRNA Prostate Stromal and Epithelial Overlaps 0.001**

| id            | chr | start     |
|---------------|-----|-----------|
| piR-rno-220   | 3   | 120268801 |
| piR-rno-2490  | 3   | 146945235 |
| piR-rno-3102  | 20  | 6634461   |
| piR-rno-3686  | 1   | 131021248 |
| piR-rno-3988  | 6   | 122382919 |
| piR-rno-4301  | 20  | 6660191   |
| piR-rno-6777  | 20  | 6679528   |
| piR-rno-7819  | 20  | 6623847   |
| piR-rno-8940  | 20  | 6680121   |
| piR-rno-10929 | 20  | 6652053   |
| piR-rno-11689 | 20  | 6642860   |
| piR-rno-13064 | 4   | 117651976 |
| piR-rno-14184 | 20  | 6662987   |
| piR-rno-14406 | 20  | 6669159   |
| piR-rno-14617 | 20  | 6623914   |
| piR-rno-14798 | X   | 107054233 |
| piR-rno-15619 | 20  | 6668525   |
| piR-rno-15704 | 20  | 6672989   |
| piR-rno-16346 | 20  | 6642863   |
| piR-rno-16585 | 20  | 6680101   |
| piR-rno-16818 | 20  | 6635475   |
| piR-rno-19617 | 7   | 119885479 |
| piR-rno-20568 | 20  | 6651884   |
| piR-rno-21623 | 20  | 6632039   |
| piR-rno-23823 | 20  | 6638130   |
| piR-rno-27656 | 3   | 81482722  |
| piR-rno-27796 | 15  | 245746    |
| piR-rno-30402 | 5   | 91131795  |
| piR-rno-34667 | 20  | 6671547   |
| piR-rno-36179 | 20  | 6676627   |
| piR-rno-41278 | NA  | NA        |
| piR-rno-54090 | 20  | 6669070   |
| piR-rno-55529 | 7   | 99564978  |
| piR-rno-56843 | 6   | 122382920 |
| piR-rno-61203 | 1   | 109521611 |

**Supplemental Table S7**  
**Site Table lncRNA Prostate Epithelial 0.001**

| test_id        | Chr | Start     | mRNA_size | ORF_size | log2.fold_change. | p_value | q_value  | Gene           | Category    |
|----------------|-----|-----------|-----------|----------|-------------------|---------|----------|----------------|-------------|
| TCONS_00000097 | 1   | 8126655   | 18935     | 327      | -0.985            | 0.0001  | 1.72E-03 | -              |             |
| TCONS_00000104 | 1   | 8255913   | 48739     | 453      | -0.716            | 0.00005 | 9.26E-04 | -              |             |
| TCONS_00000109 | 1   | 8774090   | 17523     | 405      | -0.764            | 0.00015 | 2.46E-03 | -              |             |
| TCONS_00001530 | 1   | 78112558  | 1279      | 135      | 0.985             | 0.00015 | 2.46E-03 | AABR07002627.1 |             |
| TCONS_00003723 | 1   | 175995019 | 12898     | 672      | -0.971            | 0.00005 | 9.26E-04 | -              |             |
| TCONS_00005960 | 1   | 249591548 | 4727      | 276      | -2.519            | 0.00005 | 9.26E-04 | -              |             |
| TCONS_00005961 | 1   | 249596765 | 18434     | 324      | -2.559            | 0.00005 | 9.26E-04 | -              |             |
| TCONS_00005962 | 1   | 249645239 | 20247     | 288      | -2.509            | 0.00005 | 9.26E-04 | -              |             |
| TCONS_00005963 | 1   | 249695987 | 13730     | 264      | -1.793            | 0.00005 | 9.26E-04 | -              |             |
| TCONS_00005965 | 1   | 249735066 | 39387     | 402      | -2.067            | 0.00005 | 9.26E-04 | -              |             |
| TCONS_00006476 | 1   | 274168224 | 959       | 204      | 1.219             | 0.00005 | 9.26E-04 | -              |             |
| TCONS_00006563 | 1   | 276895960 | 7303      | 294      | 0.73              | 0.0005  | 6.80E-03 | -              |             |
| TCONS_00006920 | 1   | 14132251  | 27804     | 375      | -0.977            | 0.00005 | 9.26E-04 | -              |             |
| TCONS_00006935 | 1   | 14180975  | 16524     | 513      | -0.945            | 0.00005 | 9.26E-04 | -              |             |
| TCONS_00007020 | 1   | 20966066  | 23066     | 396      | -0.861            | 0.0002  | 3.15E-03 | -              |             |
| TCONS_00007021 | 1   | 20989996  | 18996     | 621      | -0.794            | 0.00005 | 9.26E-04 | -              |             |
| TCONS_00009855 | 1   | 162054045 | 20511     | 405      | -0.751            | 0.00025 | 3.82E-03 | -              |             |
| TCONS_00010873 | 1   | 198719161 | 2315      | 996      | 0.726             | 0.00095 | 1.14E-02 | Sephs2         | Metabolism  |
| TCONS_00012575 | 1   | 249789640 | 24387     | 666      | -1.757            | 0.00085 | 1.05E-02 | AABR07006724.1 |             |
| TCONS_00012578 | 1   | 249789640 | 95933     | 864      | -2.081            | 0.00005 | 9.26E-04 | -              |             |
| TCONS_00012829 | 1   | 261854669 | 10541     | 405      | -1.202            | 0.00005 | 9.26E-04 | -              |             |
| TCONS_00012833 | 1   | 261854669 | 14019     | 351      | -1.707            | 0.0001  | 1.72E-03 | -              |             |
| TCONS_00013202 | 1   | 279623621 | 2652      | 306      | 1.477             | 0.0001  | 1.72E-03 | -              |             |
| TCONS_00013806 | 1   | 23237904  | 33124     | 306      | -1.431            | 0.00005 | 9.26E-04 | -              |             |
| TCONS_00013989 | 1   | 31465283  | 2317      | 198      | -1.095            | 0.00005 | 9.26E-04 | -              |             |
| TCONS_00014677 | 1   | 62084377  | 629       | 78       |                   | 0.00005 | 9.26E-04 | -              |             |
| TCONS_00017668 | 1   | 249628639 | 8117      | 393      | -2.412            | 0.00005 | 9.26E-04 | -              |             |
| TCONS_00017669 | 1   | 249665572 | 29495     | 375      | -1.921            | 0.00005 | 9.26E-04 | -              |             |
| TCONS_00017670 | 1   | 249722776 | 10728     | 273      | -1.248            | 0.0001  | 1.72E-03 | -              |             |
| TCONS_00017762 | 1   | 254204088 | 2168      | 225      | -1.221            | 0.00055 | 7.37E-03 | -              |             |
| TCONS_00017895 | 1   | 262780800 | 583       | 72       |                   | 0.0002  | 3.15E-03 | -              |             |
| TCONS_00023730 | 10  | 56527084  | 1197      | 465      | 0.761             | 0.00005 | 9.26E-04 | Eif5a          | Translation |
| TCONS_00025682 | 10  | 101696383 | 10842     | 375      | -2.451            | 0.00005 | 9.26E-04 | -              |             |
| TCONS_00025683 | 10  | 101708032 | 3355      | 294      | -2.272            | 0.00005 | 9.26E-04 | -              |             |
| TCONS_00025957 | 10  | 107939842 | 13912     | 456      | -3.29             | 0.00005 | 9.26E-04 | -              |             |
| TCONS_00028247 | 10  | 107926884 | 3921      | 213      | -2.691            | 0.00035 | 5.07E-03 | -              |             |
| TCONS_00028466 | 11  | 16062031  | 72436     | 570      | -1.481            | 0.00005 | 9.26E-04 | Mir3588        |             |
| TCONS_00030661 | 11  | 57505004  | 31425     | 324      | -1.223            | 0.00005 | 9.26E-04 | -              |             |
| TCONS_00030911 | 11  | 69426747  | 25703     | 942      | -2.338            | 0.00005 | 9.26E-04 | -              |             |
| TCONS_00030912 | 11  | 69452557  | 12817     | 387      | -2.378            | 0.00005 | 9.26E-04 | -              |             |
| TCONS_00032673 | 11  | 58056659  | 18666     | 261      | -0.763            | 0.00015 | 2.46E-03 | -              |             |
| TCONS_00033925 | 12  | 15362330  | 21863     | 420      | -1.09             | 0.00005 | 9.26E-04 | -              |             |
| TCONS_00033927 | 12  | 15400657  | 18505     | 711      | -1.294            | 0.00005 | 9.26E-04 | -              |             |
| TCONS_00035672 | 12  | 15180762  | 14879     | 393      | -1.394            | 0.00005 | 9.26E-04 | -              |             |
| TCONS_00035673 | 12  | 15259395  | 14164     | 450      | -1.517            | 0.00005 | 9.26E-04 | -              |             |
| TCONS_00035675 | 12  | 15275102  | 44482     | 462      | -1.274            | 0.00005 | 9.26E-04 | -              |             |
| TCONS_00036032 | 12  | 28381981  | 37213     | 912      | -2.328            | 0.00005 | 9.26E-04 | Rn60_12_0305.1 |             |
| TCONS_00037142 | 12  | 15423659  | 2876      | 327      | -1.163            | 0.00035 | 5.07E-03 | -              |             |
| TCONS_00037143 | 12  | 15426684  | 14460     | 234      | -0.838            | 0.00005 | 9.26E-04 | -              |             |
| TCONS_00037352 | 12  | 30959997  | 1359      | 204      | -1.537            | 0.00005 | 9.26E-04 | -              |             |

|                |    |           |        |     |        |         |          |        |  |
|----------------|----|-----------|--------|-----|--------|---------|----------|--------|--|
| TCONS_00038987 | 13 | 96534691  | 35239  | 564 | -0.836 | 0.00005 | 9.26E-04 | -      |  |
| TCONS_00039674 | 13 | 50599107  | 27309  | 480 | -1.544 | 0.00005 | 9.26E-04 | -      |  |
| TCONS_00042412 | 13 | 96618810  | 13300  | 339 | -0.898 | 0.0003  | 4.46E-03 | -      |  |
| TCONS_00042525 | 13 | 97519370  | 17013  | 366 | -0.839 | 0.00005 | 9.26E-04 | -      |  |
| TCONS_00043898 | 14 | 54648921  | 53978  | 420 | -1.566 | 0.00005 | 9.26E-04 | -      |  |
| TCONS_00044457 | 14 | 87147950  | 7515   | 564 | -1.211 | 0.00005 | 9.26E-04 | -      |  |
| TCONS_00044564 | 14 | 101135664 | 2253   | 378 | -1.25  | 0.00005 | 9.26E-04 | -      |  |
| TCONS_00045419 | 14 | 31252929  | 14388  | 426 | -1.142 | 0.00005 | 9.26E-04 | -      |  |
| TCONS_00046098 | 14 | 79919716  | 26839  | 324 | -1.605 | 0.0002  | 3.15E-03 | -      |  |
| TCONS_00047033 | 14 | 13399769  | 8677   | 528 | -1.198 | 0.00005 | 9.26E-04 | -      |  |
| TCONS_00047173 | 14 | 21222284  | 793    | 99  |        | 0.00005 | 9.26E-04 | -      |  |
| TCONS_00048726 | 14 | 115451889 | 6701   | 276 | -3.086 | 0.00005 | 9.26E-04 | -      |  |
| TCONS_00048755 | 15 | 2294539   | 43495  | 408 | -1.097 | 0.00005 | 9.26E-04 | -      |  |
| TCONS_00048980 | 15 | 15985366  | 40115  | 432 | -0.644 | 0.0003  | 4.46E-03 | -      |  |
| TCONS_00048981 | 15 | 16035004  | 18862  | 435 | -0.895 | 0.00005 | 9.26E-04 | -      |  |
| TCONS_00048984 | 15 | 16159303  | 38165  | 579 | -0.781 | 0.00005 | 9.26E-04 | -      |  |
| TCONS_00048986 | 15 | 16224034  | 2547   | 234 | -1.154 | 0.00085 | 1.05E-02 | -      |  |
| TCONS_00048987 | 15 | 16226726  | 6492   | 201 | -0.907 | 0.00085 | 1.05E-02 | -      |  |
| TCONS_00048991 | 15 | 16337989  | 41650  | 489 | -1.002 | 0.00005 | 9.26E-04 | -      |  |
| TCONS_00050618 | 15 | 16055517  | 40094  | 354 | -0.854 | 0.0002  | 3.15E-03 | -      |  |
| TCONS_00050621 | 15 | 16233519  | 49038  | 348 | -0.751 | 0.00005 | 9.26E-04 | -      |  |
| TCONS_00050918 | 15 | 30541238  | 7072   | 327 | -1.128 | 0.00005 | 9.26E-04 | -      |  |
| TCONS_00051909 | 15 | 102119617 | 1731   | 171 | -2.234 | 0.00005 | 9.26E-04 | -      |  |
| TCONS_00051910 | 15 | 102123213 | 2775   | 297 | -2.166 | 0.0001  | 1.72E-03 | -      |  |
| TCONS_00052109 | 15 | 2218730   | 15018  | 273 | -1.101 | 0.00005 | 9.26E-04 | -      |  |
| TCONS_00052114 | 15 | 2259144   | 35237  | 492 | -1.085 | 0.00005 | 9.26E-04 | -      |  |
| TCONS_00052397 | 15 | 16283172  | 9700   | 297 | -0.864 | 0.00065 | 8.43E-03 | -      |  |
| TCONS_00052538 | 15 | 17401165  | 5145   | 303 | -1.389 | 0.00005 | 9.26E-04 | -      |  |
| TCONS_00055305 | 16 | 65575959  | 19796  | 483 | -1.034 | 0.00005 | 9.26E-04 | -      |  |
| TCONS_00057028 | 16 | 366041    | 540    | 18  |        | 0.00005 | 9.26E-04 | -      |  |
| TCONS_00058585 | 16 | 89060609  | 602    | 108 |        | 0.00005 | 9.26E-04 | -      |  |
| TCONS_00059107 | 17 | 16958074  | 6337   | 285 | -1.047 | 0.0001  | 1.72E-03 | -      |  |
| TCONS_00060189 | 17 | 81633170  | 18346  | 294 | -2.092 | 0.00025 | 3.82E-03 | -      |  |
| TCONS_00062030 | 17 | 81633170  | 45251  | 492 | -2.415 | 0.00005 | 9.26E-04 | -      |  |
| TCONS_00063573 | 17 | 60572282  | 5526   | 402 | -1.496 | 0.00005 | 9.26E-04 | -      |  |
| TCONS_00064358 | 18 | 16107176  | 8910   | 549 | -0.797 | 0.00045 | 6.24E-03 | -      |  |
| TCONS_00066402 | 18 | 56957425  | 21792  | 486 | -1.314 | 0.00065 | 8.43E-03 | Mir143 |  |
| TCONS_00066718 | 18 | 75090475  | 98877  | 450 | -1.67  | 0.00015 | 2.46E-03 | -      |  |
| TCONS_00066721 | 18 | 75443433  | 7656   | 285 | -1.243 | 0.0001  | 1.72E-03 | -      |  |
| TCONS_00066948 | 18 | 3095598   | 3967   | 189 | -1.485 | 0.00065 | 8.43E-03 | -      |  |
| TCONS_00067197 | 18 | 16981547  | 567    | 93  |        | 0.00005 | 9.26E-04 | -      |  |
| TCONS_00067543 | 18 | 32633113  | 5971   | 225 | -0.945 | 0.00005 | 9.26E-04 | -      |  |
| TCONS_00067544 | 18 | 32639353  | 1570   | 255 | -1.154 | 0.00055 | 7.37E-03 | -      |  |
| TCONS_00067547 | 18 | 32645002  | 8801   | 417 | -0.691 | 0.00045 | 6.24E-03 | -      |  |
| TCONS_00068076 | 18 | 55255692  | 661    | 78  |        | 0.00005 | 9.26E-04 | -      |  |
| TCONS_00068567 | 18 | 87128831  | 1446   | 279 | -1.109 | 0.00085 | 1.05E-02 | -      |  |
| TCONS_00068955 | 19 | 23542467  | 42803  | 606 | -1.03  | 0.00015 | 2.46E-03 | -      |  |
| TCONS_00069177 | 19 | 31615785  | 5178   | 252 | -1.006 | 0.00005 | 9.26E-04 | uc_338 |  |
| TCONS_00069597 | 19 | 47159236  | 115423 | 516 | -0.725 | 0.00005 | 9.26E-04 | -      |  |
| TCONS_00069603 | 19 | 47313675  | 52382  | 486 | -0.684 | 0.0001  | 1.72E-03 | -      |  |
| TCONS_00069606 | 19 | 47411063  | 9976   | 360 | -0.957 | 0.00025 | 3.82E-03 | -      |  |
| TCONS_00069607 | 19 | 47421312  | 50570  | 618 | -0.733 | 0.00005 | 9.26E-04 | -      |  |
| TCONS_00070929 | 19 | 47143859  | 10152  | 378 | -0.856 | 0.00005 | 9.26E-04 | -      |  |

|                |    |           |        |      |        |         |          |                |  |
|----------------|----|-----------|--------|------|--------|---------|----------|----------------|--|
| TCONS_00071909 | 19 | 47155012  | 4141   | 330  | -1.321 | 0.00005 | 9.26E-04 | -              |  |
| TCONS_00071911 | 19 | 47373166  | 7495   | 363  | -0.865 | 0.0005  | 6.80E-03 | -              |  |
| TCONS_00071938 | 19 | 47558544  | 2543   | 228  | -2.221 | 0.00075 | 9.47E-03 | -              |  |
| TCONS_00072378 | 2  | 123551    | 4978   | 285  | -0.88  | 0.0001  | 1.72E-03 | -              |  |
| TCONS_00073301 | 2  | 73232062  | 7773   | 360  | -1.436 | 0.00005 | 9.26E-04 | -              |  |
| TCONS_00073349 | 2  | 79067914  | 54298  | 369  | -1.77  | 0.00005 | 9.26E-04 | AABR07008916.1 |  |
| TCONS_00073420 | 2  | 88734941  | 6595   | 348  | -1.533 | 0.00005 | 9.26E-04 | -              |  |
| TCONS_00074148 | 2  | 150879847 | 3405   | 213  | -0.684 | 0.0002  | 3.15E-03 | -              |  |
| TCONS_00076924 | 2  | 39135042  | 10052  | 351  | -0.664 | 0.0003  | 4.46E-03 | -              |  |
| TCONS_00077952 | 2  | 153743389 | 6691   | 249  | -0.957 | 0.0003  | 4.46E-03 | -              |  |
| TCONS_00082071 | 2  | 103149264 | 5174   | 294  | -1.095 | 0.00015 | 2.46E-03 | -              |  |
| TCONS_00084182 | 2  | 211762403 | 3839   | 198  | -0.887 | 0.00035 | 5.07E-03 | -              |  |
| TCONS_00086062 | 20 | 18688024  | 6833   | 216  | -0.927 | 0.00025 | 3.82E-03 | -              |  |
| TCONS_00086065 | 20 | 18738902  | 14112  | 1059 | -1.175 | 0.00005 | 9.26E-04 | -              |  |
| TCONS_00086066 | 20 | 18753079  | 11326  | 645  | -1.062 | 0.0009  | 1.10E-02 | -              |  |
| TCONS_00086633 | 20 | 50439739  | 4382   | 531  | -0.837 | 0.00095 | 1.14E-02 | Bves           |  |
| TCONS_00090340 | 3  | 38392701  | 28689  | 414  | -1.83  | 0.00005 | 9.26E-04 | -              |  |
| TCONS_00090349 | 3  | 38392701  | 49324  | 378  | -1.712 | 0.00005 | 9.26E-04 | -              |  |
| TCONS_00093005 | 3  | 166467656 | 66872  | 582  | -1.801 | 0.00005 | 9.26E-04 | -              |  |
| TCONS_00094627 | 3  | 60110393  | 5720   | 519  | -0.93  | 0.00005 | 9.26E-04 | -              |  |
| TCONS_00096278 | 3  | 139333856 | 51531  | 447  | -2.046 | 0.00005 | 9.26E-04 | -              |  |
| TCONS_00096918 | 3  | 161180132 | 8924   | 303  | 2.441  | 0.00005 | 9.26E-04 | -              |  |
| TCONS_00097078 | 3  | 165360737 | 2114   | 330  | -2.245 | 0.00065 | 8.43E-03 | -              |  |
| TCONS_00097079 | 3  | 165365024 | 9676   | 528  | -2.033 | 0.00005 | 9.26E-04 | -              |  |
| TCONS_00097213 | 3  | 175763331 | 5806   | 354  | -1.283 | 0.00045 | 6.24E-03 | Mir1b          |  |
| TCONS_00098084 | 3  | 60106633  | 3212   | 330  | -1.095 | 0.00035 | 5.07E-03 | -              |  |
| TCONS_00098794 | 3  | 107381335 | 1527   | 147  | -1.973 | 0.00065 | 8.43E-03 | -              |  |
| TCONS_00099751 | 3  | 144080680 | 1190   | 234  | -1.156 | 0.00005 | 9.26E-04 | -              |  |
| TCONS_00100113 | 3  | 161190694 | 984    | 234  | 1.28   | 0.0007  | 8.95E-03 | -              |  |
| TCONS_00100514 | 3  | 175775624 | 3045   | 228  | -2.193 | 0.0006  | 7.89E-03 | -              |  |
| TCONS_00103433 | 4  | 168527521 | 11300  | 432  | -0.723 | 0.0004  | 5.66E-03 | -              |  |
| TCONS_00103434 | 4  | 168539534 | 10532  | 480  | -0.85  | 0.00005 | 9.26E-04 | -              |  |
| TCONS_00103517 | 4  | 171595598 | 13375  | 354  | -1.36  | 0.00005 | 9.26E-04 | -              |  |
| TCONS_00103765 | 4  | 182620091 | 4890   | 486  | -0.764 | 0.00095 | 1.14E-02 | -              |  |
| TCONS_00104577 | 4  | 66957436  | 4332   | 294  | -0.925 | 0.00045 | 6.24E-03 | -              |  |
| TCONS_00104966 | 4  | 90923522  | 2508   | 270  | -1.306 | 0.0003  | 4.46E-03 | -              |  |
| TCONS_00105564 | 4  | 125684691 | 160392 | 495  | -0.935 | 0.00005 | 9.26E-04 | -              |  |
| TCONS_00105927 | 4  | 150635805 | 77082  | 687  | -2.733 | 0.00005 | 9.26E-04 | -              |  |
| TCONS_00105928 | 4  | 150635805 | 46413  | 678  | -2.642 | 0.00005 | 9.26E-04 | -              |  |
| TCONS_00106422 | 4  | 168072953 | 4757   | 228  | -1.218 | 0.00035 | 5.07E-03 | -              |  |
| TCONS_00106491 | 4  | 171614193 | 19991  | 495  | -0.72  | 0.00035 | 5.07E-03 | -              |  |
| TCONS_00106492 | 4  | 171634259 | 11204  | 294  | -0.838 | 0.0001  | 1.72E-03 | -              |  |
| TCONS_00107493 | 4  | 35002322  | 700    | 90   |        | 0.00005 | 9.26E-04 | -              |  |
| TCONS_00107498 | 4  | 35015107  | 920    | 147  |        | 0.00005 | 9.26E-04 | -              |  |
| TCONS_00107513 | 4  | 35046517  | 793    | 192  |        | 0.00005 | 9.26E-04 | -              |  |
| TCONS_00109686 | 4  | 159670366 | 1657   | 225  | -0.896 | 0.00005 | 9.26E-04 | -              |  |
| TCONS_00110713 | 5  | 40318425  | 4874   | 411  | -0.86  | 0.00005 | 9.26E-04 | -              |  |
| TCONS_00110742 | 5  | 47465739  | 42927  | 342  | -1.136 | 0.0005  | 6.80E-03 | -              |  |
| TCONS_00111201 | 5  | 71682087  | 60432  | 549  | -0.591 | 0.00055 | 7.37E-03 | -              |  |
| TCONS_00116678 | 5  | 162804976 | 2276   | 219  | 1.329  | 0.0004  | 5.66E-03 | -              |  |
| TCONS_00116878 | 5  | 166934541 | 17141  | 519  | -0.763 | 0.00005 | 9.26E-04 | -              |  |
| TCONS_00120432 | 6  | 4255516   | 40312  | 399  | -1.763 | 0.00005 | 9.26E-04 | AABR07062708.1 |  |
| TCONS_00120542 | 6  | 9711793   | 24250  | 516  | -0.889 | 0.00005 | 9.26E-04 | -              |  |

|                |   |           |       |     |        |         |          |                |  |
|----------------|---|-----------|-------|-----|--------|---------|----------|----------------|--|
| TCONS_00121897 | 6 | 103364181 | 39015 | 348 | -1.318 | 0.00015 | 2.46E-03 | AC118496.1     |  |
| TCONS_00122514 | 6 | 133658880 | 5400  | 372 | -1.04  | 0.00005 | 9.26E-04 | AABR07065531.1 |  |
| TCONS_00122519 | 6 | 133667221 | 24841 | 390 | -1.451 | 0.00005 | 9.26E-04 | AABR07065531.5 |  |
| TCONS_00123074 | 6 | 6584464   | 12059 | 255 | -0.718 | 0.0004  | 5.66E-03 | -              |  |
| TCONS_00124428 | 6 | 104410955 | 970   | 219 | 0.966  | 0.0005  | 6.80E-03 | -              |  |
| TCONS_00126199 | 6 | 30528636  | 954   | 207 | 1.518  | 0.0004  | 5.66E-03 | -              |  |
| TCONS_00126475 | 6 | 43193065  | 2368  | 222 | -2.468 | 0.00065 | 8.43E-03 | -              |  |
| TCONS_00129503 | 7 | 42570940  | 21509 | 399 | -1.314 | 0.00025 | 3.82E-03 | -              |  |
| TCONS_00129504 | 7 | 42592577  | 8013  | 264 | -1.297 | 0.00005 | 9.26E-04 | -              |  |
| TCONS_00130142 | 7 | 98059904  | 3804  | 282 | -0.87  | 0.00005 | 9.26E-04 | -              |  |
| TCONS_00131723 | 7 | 3051684   | 1103  | 348 | 0.61   | 0.00015 | 2.46E-03 | -              |  |
| TCONS_00133328 | 7 | 77456799  | 7606  | 258 | 2.119  | 0.00005 | 9.26E-04 | -              |  |
| TCONS_00133701 | 7 | 114851069 | 18280 | 429 | -0.854 | 0.0003  | 4.46E-03 | -              |  |
| TCONS_00135033 | 7 | 412395    | 873   | 240 | -1.302 | 0.00005 | 9.26E-04 | -              |  |
| TCONS_00135094 | 7 | 1453382   | 752   | 84  | -0.964 | 0.0003  | 4.46E-03 | -              |  |
| TCONS_00135847 | 7 | 42600680  | 1249  | 117 | -1.531 | 0.00055 | 7.37E-03 | -              |  |
| TCONS_00135853 | 7 | 42617467  | 2548  | 240 | -1.753 | 0.0001  | 1.72E-03 | -              |  |
| TCONS_00135889 | 7 | 42710730  | 2425  | 186 | -1.669 | 0.00075 | 9.47E-03 | -              |  |
| TCONS_00135890 | 7 | 42713344  | 4832  | 195 | -1.259 | 0.00015 | 2.46E-03 | -              |  |
| TCONS_00136983 | 7 | 92497283  | 1949  | 279 | -1.139 | 0.00005 | 9.26E-04 | -              |  |
| TCONS_00137269 | 7 | 102932754 | 469   | 45  |        | 0.0004  | 5.66E-03 | -              |  |
| TCONS_00138040 | 8 | 4292229   | 5956  | 570 | -0.66  | 0.00045 | 6.24E-03 | -              |  |
| TCONS_00138121 | 8 | 13037264  | 10110 | 309 | -2.811 | 0.0001  | 1.72E-03 | -              |  |
| TCONS_00138742 | 8 | 44354220  | 10763 | 405 | -2.288 | 0.00005 | 9.26E-04 | -              |  |
| TCONS_00138772 | 8 | 45753253  | 14593 | 237 | -1.457 | 0.00005 | 9.26E-04 | Mir3596a       |  |
| TCONS_00138773 | 8 | 45768032  | 20225 | 528 | -1.828 | 0.00005 | 9.26E-04 | -              |  |
| TCONS_00139337 | 8 | 64811940  | 32314 | 429 | -2.232 | 0.00005 | 9.26E-04 | -              |  |
| TCONS_00139923 | 8 | 85186549  | 36463 | 438 | -0.84  | 0.00005 | 9.26E-04 | -              |  |
| TCONS_00141837 | 8 | 44381195  | 7946  | 273 | -2.061 | 0.00005 | 9.26E-04 | -              |  |
| TCONS_00141838 | 8 | 44389523  | 9962  | 330 | -1.679 | 0.00005 | 9.26E-04 | -              |  |
| TCONS_00142489 | 8 | 64811940  | 24227 | 486 | -2.201 | 0.00055 | 7.37E-03 | Rn60_8_0651.1  |  |
| TCONS_00142735 | 8 | 73195276  | 61117 | 516 | -0.741 | 0.00025 | 3.82E-03 | -              |  |
| TCONS_00142874 | 8 | 81797817  | 2405  | 225 | 1.119  | 0.00065 | 8.43E-03 | -              |  |
| TCONS_00144892 | 8 | 44350342  | 3588  | 267 | -2.146 | 0.00025 | 3.82E-03 | -              |  |
| TCONS_00145836 | 8 | 85256907  | 2317  | 204 | -1.155 | 0.00015 | 2.46E-03 | -              |  |
| TCONS_00149700 | 9 | 27925341  | 13514 | 426 | -2.328 | 0.00005 | 9.26E-04 | -              |  |
| TCONS_00149701 | 9 | 27943951  | 35453 | 477 | -2.112 | 0.00005 | 9.26E-04 | -              |  |
| TCONS_00149702 | 9 | 27943951  | 19746 | 387 | -2.051 | 0.00005 | 9.26E-04 | -              |  |
| TCONS_00149703 | 9 | 28005854  | 12540 | 369 | -1.803 | 0.00005 | 9.26E-04 | -              |  |
| TCONS_00149704 | 9 | 28018578  | 28068 | 294 | -2.19  | 0.00005 | 9.26E-04 | -              |  |
| TCONS_00149705 | 9 | 28046888  | 79518 | 570 | -2.159 | 0.00005 | 9.26E-04 | -              |  |
| TCONS_00149707 | 9 | 28046888  | 25120 | 468 | -2.165 | 0.00005 | 9.26E-04 | -              |  |
| TCONS_00149828 | 9 | 40512446  | 1756  | 222 | -2.039 | 0.00005 | 9.26E-04 | -              |  |
| TCONS_00149837 | 9 | 40512446  | 2978  | 339 | -2.215 | 0.00005 | 9.26E-04 | -              |  |
| TCONS_00150219 | 9 | 62015613  | 43917 | 678 | -1.601 | 0.00055 | 7.37E-03 | -              |  |
| TCONS_00150404 | 9 | 72573005  | 2501  | 207 | -0.807 | 0.0001  | 1.72E-03 | -              |  |
| TCONS_00151721 | 9 | 27916744  | 8490  | 417 | -1.668 | 0.00005 | 9.26E-04 | -              |  |
| TCONS_00153827 | X | 13804971  | 2304  | 417 | -1.259 | 0.00055 | 7.37E-03 | -              |  |
| TCONS_00153830 | X | 13815921  | 14331 | 507 | -1.593 | 0.00005 | 9.26E-04 | -              |  |
| TCONS_00154183 | X | 26675170  | 20874 | 273 | -0.973 | 0.00005 | 9.26E-04 | -              |  |
| TCONS_00154297 | X | 34313311  | 15948 | 735 | -1.938 | 0.00005 | 9.26E-04 | -              |  |
| TCONS_00155926 | X | 14644275  | 7343  | 354 | -1.283 | 0.00005 | 9.26E-04 | -              |  |
| TCONS_00156113 | X | 26696434  | 11083 | 261 | -1.136 | 0.00005 | 9.26E-04 | -              |  |



|                |   |           |       |     |        |         |          |   |  |
|----------------|---|-----------|-------|-----|--------|---------|----------|---|--|
| TCONS_00156114 | X | 26707992  | 60343 | 564 | -0.828 | 0.00005 | 9.26E-04 | - |  |
| TCONS_00157666 | X | 3258006   | 10062 | 270 | -0.904 | 0.00065 | 8.43E-03 | - |  |
| TCONS_00158248 | X | 26592619  | 28218 | 399 | -0.825 | 0.00005 | 9.26E-04 | - |  |
| TCONS_00158319 | X | 32910305  | 938   | 165 | -2.826 | 0.0005  | 6.80E-03 | - |  |
| TCONS_00158350 | X | 34329793  | 7684  | 354 | -1.777 | 0.00005 | 9.26E-04 | - |  |
| TCONS_00160334 | X | 156075167 | 6124  | 639 | -1.708 | 0.00005 | 9.26E-04 | - |  |

## Supplemental Table S8

### Site Table lncRNA Prostate Stromal (p<0.001)

| test_id        | Chr | Start     | mRNA_size | ORF_size | log2.fold_change. | p_value | q_value  | Gene   | Category |
|----------------|-----|-----------|-----------|----------|-------------------|---------|----------|--------|----------|
| TCONS_00000047 | 1   | 3587953   | 12978     | 417      | -1.249            | 0.00005 | 9.26E-04 | -      |          |
| TCONS_00000097 | 1   | 8126655   | 18935     | 327      | -0.988            | 0.0001  | 1.72E-03 | -      |          |
| TCONS_00000104 | 1   | 8255913   | 48739     | 453      | -0.793            | 0.00005 | 9.26E-04 | -      |          |
| TCONS_00000223 | 1   | 14161063  | 7776      | 273      | -1.46             | 0.00005 | 9.26E-04 | -      |          |
| TCONS_00001754 | 1   | 81947578  | 1752      | 348      | -1.193            | 0.00005 | 9.26E-04 | -      |          |
| TCONS_00002846 | 1   | 130032606 | 18105     | 495      | -1.031            | 0.00005 | 9.26E-04 | -      |          |
| TCONS_00005960 | 1   | 249591548 | 4727      | 276      | -1.421            | 0.00005 | 9.26E-04 | -      |          |
| TCONS_00005961 | 1   | 249596765 | 18434     | 324      | -1.276            | 0.00005 | 9.26E-04 | -      |          |
| TCONS_00005962 | 1   | 249645239 | 20247     | 288      | -1.156            | 0.00005 | 9.26E-04 | -      |          |
| TCONS_00005963 | 1   | 249695987 | 13730     | 264      | -1                | 0.00005 | 9.26E-04 | -      |          |
| TCONS_00005965 | 1   | 249735066 | 39387     | 402      | -0.991            | 0.00005 | 9.26E-04 | -      |          |
| TCONS_00006754 | 1   | 3170237   | 14471     | 318      | -0.994            | 0.00005 | 9.26E-04 | -      |          |
| TCONS_00006755 | 1   | 3255211   | 18084     | 744      | -0.92             | 0.00005 | 9.26E-04 | -      |          |
| TCONS_00006756 | 1   | 3316977   | 31542     | 546      | -1.015            | 0.00005 | 9.26E-04 | -      |          |
| TCONS_00006759 | 1   | 3622310   | 5355      | 285      | -1.348            | 0.00005 | 9.26E-04 | -      |          |
| TCONS_00006760 | 1   | 3627977   | 18966     | 342      | -0.942            | 0.00005 | 9.26E-04 | -      |          |
| TCONS_00006762 | 1   | 3668722   | 11002     | 399      | -0.958            | 0.00005 | 9.26E-04 | -      |          |
| TCONS_00006828 | 1   | 8232208   | 9050      | 486      | -1.055            | 0.00005 | 9.26E-04 | -      |          |
| TCONS_00006829 | 1   | 8241669   | 4228      | 414      | -1.628            | 0.00005 | 9.26E-04 | -      |          |
| TCONS_00006920 | 1   | 14132251  | 27804     | 375      | -1.178            | 0.00005 | 9.26E-04 | -      |          |
| TCONS_00006935 | 1   | 14180975  | 16524     | 513      | -1.263            | 0.00015 | 2.46E-03 | -      |          |
| TCONS_00007020 | 1   | 20966066  | 23066     | 396      | -0.805            | 0.00005 | 9.26E-04 | -      |          |
| TCONS_00007021 | 1   | 20989996  | 18996     | 621      | -0.761            | 0.00005 | 9.26E-04 | -      |          |
| TCONS_00007027 | 1   | 21054482  | 13222     | 420      | -0.571            | 0.00075 | 9.47E-03 | -      |          |
| TCONS_00011365 | 1   | 215744373 | 2376      | 261      | 0.646             | 0.0009  | 1.10E-02 | Mir675 |          |
| TCONS_00011931 | 1   | 221177114 | 5204      | 255      | -1.477            | 0.00005 | 9.26E-04 | -      |          |
| TCONS_00012571 | 1   | 249564179 | 8180      | 459      | -0.91             | 0.0001  | 1.72E-03 | -      |          |
| TCONS_00012578 | 1   | 249789640 | 95933     | 864      | -0.927            | 0.00015 | 2.46E-03 | -      |          |
| TCONS_00012833 | 1   | 261854669 | 14019     | 351      | -1.117            | 0.0001  | 1.72E-03 | -      |          |
| TCONS_00013106 | 1   | 276098598 | 31529     | 372      | -0.897            | 0.00005 | 9.26E-04 | -      |          |
| TCONS_00013127 | 1   | 276575086 | 24344     | 456      | -0.637            | 0.0007  | 8.95E-03 | -      |          |
| TCONS_00013329 | 1   | 3053887   | 6282      | 255      | -1.2              | 0.00005 | 9.26E-04 | -      |          |
| TCONS_00013339 | 1   | 3075204   | 678       | 249      |                   | 0.00005 | 9.26E-04 | -      |          |
| TCONS_00013342 | 1   | 3077782   | 4158      | 192      | -1.264            | 0.0004  | 5.66E-03 | -      |          |
| TCONS_00013349 | 1   | 3099614   | 5966      | 270      | -1.313            | 0.0001  | 1.72E-03 | -      |          |
| TCONS_00013357 | 1   | 3116495   | 12314     | 405      | -0.995            | 0.00005 | 9.26E-04 | -      |          |
| TCONS_00013362 | 1   | 3142003   | 3614      | 309      | -1.544            | 0.00005 | 9.26E-04 | -      |          |
| TCONS_00013368 | 1   | 3154719   | 14566     | 342      | -0.907            | 0.0002  | 3.15E-03 | -      |          |
| TCONS_00013371 | 1   | 3192333   | 35811     | 375      | -0.666            | 0.00045 | 6.24E-03 | -      |          |
| TCONS_00013372 | 1   | 3228229   | 3930      | 285      | -1.525            | 0.00005 | 9.26E-04 | -      |          |
| TCONS_00013373 | 1   | 3232230   | 22878     | 345      | -0.74             | 0.0002  | 3.15E-03 | -      |          |
| TCONS_00013374 | 1   | 3274961   | 8798      | 231      | -0.881            | 0.00055 | 7.37E-03 | -      |          |
| TCONS_00013376 | 1   | 3299260   | 8646      | 300      | -0.889            | 0.0002  | 3.15E-03 | -      |          |
| TCONS_00013377 | 1   | 3310148   | 2851      | 231      | -1.202            | 0.00045 | 6.24E-03 | -      |          |
| TCONS_00013378 | 1   | 3313153   | 3764      | 372      | -1.303            | 0.00005 | 9.26E-04 | -      |          |
| TCONS_00013417 | 1   | 3484509   | 3173      | 234      | -1.25             | 0.0007  | 8.95E-03 | -      |          |
| TCONS_00013441 | 1   | 3545446   | 4207      | 234      | -1.071            | 0.0003  | 4.46E-03 | -      |          |
| TCONS_00013444 | 1   | 3562441   | 3212      | 216      | -1.274            | 0.0003  | 4.46E-03 | -      |          |
| TCONS_00013447 | 1   | 3571432   | 3001      | 213      | -1.588            | 0.0001  | 1.72E-03 | -      |          |

|                |    |           |       |     |        |         |          |                |  |
|----------------|----|-----------|-------|-----|--------|---------|----------|----------------|--|
| TCONS_00013449 | 1  | 3574890   | 2772  | 180 | -1.43  | 0.0002  | 3.15E-03 | -              |  |
| TCONS_00013450 | 1  | 3577971   | 2400  | 183 | -1.618 | 0.0004  | 5.66E-03 | -              |  |
| TCONS_00013451 | 1  | 3580434   | 7439  | 297 | -1.017 | 0.00005 | 9.26E-04 | -              |  |
| TCONS_00013452 | 1  | 3601454   | 7060  | 249 | -1.265 | 0.00005 | 9.26E-04 | -              |  |
| TCONS_00013463 | 1  | 3679857   | 3097  | 147 | -1.288 | 0.00055 | 7.37E-03 | -              |  |
| TCONS_00013561 | 1  | 8229651   | 2411  | 198 | -1.424 | 0.00005 | 9.26E-04 | -              |  |
| TCONS_00013761 | 1  | 21887063  | 2061  | 294 | -1.885 | 0.0008  | 9.98E-03 | -              |  |
| TCONS_00015663 | 1  | 130142041 | 640   | 84  |        | 0.00005 | 9.26E-04 | -              |  |
| TCONS_00015982 | 1  | 146742910 | 572   | 93  |        | 0.00005 | 9.26E-04 | -              |  |
| TCONS_00016088 | 1  | 155618861 | 6846  | 420 | -0.973 | 0.0005  | 6.80E-03 | -              |  |
| TCONS_00016089 | 1  | 155626242 | 29961 | 282 | -0.989 | 0.00005 | 9.26E-04 | -              |  |
| TCONS_00016094 | 1  | 155693063 | 2772  | 168 | -1.684 | 0.0004  | 5.66E-03 | -              |  |
| TCONS_00016240 | 1  | 163745774 | 604   | 75  |        | 0.00005 | 9.26E-04 | -              |  |
| TCONS_00017668 | 1  | 249628639 | 8117  | 393 | -1.372 | 0.00005 | 9.26E-04 | -              |  |
| TCONS_00017669 | 1  | 249665572 | 29495 | 375 | -1.109 | 0.00005 | 9.26E-04 | -              |  |
| TCONS_00017670 | 1  | 249722776 | 10728 | 273 | -0.682 | 0.0005  | 6.80E-03 | -              |  |
| TCONS_00021686 | 10 | 101604294 | 17737 | 483 | -1.617 | 0.00005 | 9.26E-04 | -              |  |
| TCONS_00021689 | 10 | 101696383 | 11501 | 630 | -1.922 | 0.00035 | 5.07E-03 | -              |  |
| TCONS_00025209 | 10 | 90153200  | 19876 | 405 | -1.082 | 0.00005 | 9.26E-04 | -              |  |
| TCONS_00025259 | 10 | 90769554  | 2679  | 435 | -2.805 | 0.00005 | 9.26E-04 | AABR07030501.1 |  |
| TCONS_00025260 | 10 | 90773658  | 2272  | 177 | -1.268 | 0.0008  | 9.98E-03 | -              |  |
| TCONS_00025677 | 10 | 101595358 | 4892  | 369 | -1.91  | 0.00005 | 9.26E-04 | -              |  |
| TCONS_00025678 | 10 | 101623862 | 62673 | 618 | -1.705 | 0.00005 | 9.26E-04 | -              |  |
| TCONS_00025679 | 10 | 101687933 | 5729  | 378 | -1.828 | 0.00005 | 9.26E-04 | -              |  |
| TCONS_00025682 | 10 | 101696383 | 10842 | 375 | -1.476 | 0.00005 | 9.26E-04 | -              |  |
| TCONS_00025683 | 10 | 101708032 | 3355  | 294 | -1.038 | 0.00005 | 9.26E-04 | -              |  |
| TCONS_00025955 | 10 | 107515532 | 11552 | 399 | -2.944 | 0.00005 | 9.26E-04 | -              |  |
| TCONS_00025956 | 10 | 107515532 | 5317  | 276 | -3.001 | 0.00005 | 9.26E-04 | -              |  |
| TCONS_00025957 | 10 | 107939842 | 13912 | 456 | -2.427 | 0.00005 | 9.26E-04 | -              |  |
| TCONS_00027174 | 10 | 48873181  | 580   | 126 |        | 0.00005 | 9.26E-04 | -              |  |
| TCONS_00028099 | 10 | 101588731 | 3791  | 357 | -1.575 | 0.00045 | 6.24E-03 | -              |  |
| TCONS_00028101 | 10 | 101600496 | 3644  | 441 | -1.877 | 0.00005 | 9.26E-04 | -              |  |
| TCONS_00028246 | 10 | 107919555 | 6385  | 345 | -2.603 | 0.00005 | 9.26E-04 | -              |  |
| TCONS_00028247 | 10 | 107926884 | 3921  | 213 | -3.128 | 0.00005 | 9.26E-04 | -              |  |
| TCONS_00028249 | 10 | 107935089 | 2795  | 240 | -2.221 | 0.00005 | 9.26E-04 | -              |  |
| TCONS_00028591 | 11 | 31523886  | 9383  | 339 | -0.84  | 0.0003  | 4.46E-03 | -              |  |
| TCONS_00030695 | 11 | 60961711  | 2448  | 153 | -1.619 | 0.0001  | 1.72E-03 | -              |  |
| TCONS_00030911 | 11 | 69426747  | 25703 | 942 | -1.329 | 0.00005 | 9.26E-04 | -              |  |
| TCONS_00030912 | 11 | 69452557  | 12817 | 387 | -1.499 | 0.00005 | 9.26E-04 | -              |  |
| TCONS_00031647 | 11 | 12792816  | 658   | 147 |        | 0.00005 | 9.26E-04 | -              |  |
| TCONS_00032188 | 11 | 32317755  | 2926  | 300 | -1.609 | 0.0001  | 1.72E-03 | -              |  |
| TCONS_00032198 | 11 | 32337306  | 6755  | 300 | -1.411 | 0.00005 | 9.26E-04 | -              |  |
| TCONS_00032211 | 11 | 32367372  | 4620  | 531 | -1.956 | 0.00005 | 9.26E-04 | -              |  |
| TCONS_00032735 | 11 | 59344103  | 598   | 135 |        | 0.00005 | 9.26E-04 | -              |  |
| TCONS_00032820 | 11 | 60948838  | 556   | 93  |        | 0.00005 | 9.26E-04 | -              |  |
| TCONS_00032827 | 11 | 60964299  | 2225  | 162 | -1.584 | 0.0004  | 5.66E-03 | -              |  |
| TCONS_00033925 | 12 | 15362330  | 21863 | 420 | -0.758 | 0.0006  | 7.89E-03 | -              |  |
| TCONS_00033927 | 12 | 15400657  | 18505 | 711 | -0.831 | 0.00005 | 9.26E-04 | -              |  |
| TCONS_00034366 | 12 | 29251656  | 5483  | 309 | -1.102 | 0.00015 | 2.46E-03 | -              |  |
| TCONS_00034785 | 12 | 43585245  | 5068  | 285 | -1.02  | 0.00005 | 9.26E-04 | -              |  |
| TCONS_00035673 | 12 | 15259395  | 14164 | 450 | -0.932 | 0.00005 | 9.26E-04 | -              |  |
| TCONS_00036032 | 12 | 28381981  | 37213 | 912 | -1.298 | 0.00005 | 9.26E-04 | Rn60_12_0305.1 |  |
| TCONS_00036443 | 12 | 43590676  | 12324 | 315 | -0.909 | 0.00005 | 9.26E-04 | -              |  |

|                |    |           |       |     |        |         |          |    |  |
|----------------|----|-----------|-------|-----|--------|---------|----------|----|--|
| TCONS_00036444 | 12 | 43604705  | 8692  | 234 | -0.896 | 0.00005 | 9.26E-04 | -  |  |
| TCONS_00037136 | 12 | 15359153  | 2770  | 408 | -0.94  | 0.00005 | 9.26E-04 | -  |  |
| TCONS_00037143 | 12 | 15426684  | 14460 | 234 | -0.61  | 0.00055 | 7.37E-03 | -  |  |
| TCONS_00037328 | 12 | 29258634  | 2826  | 252 | -1.415 | 0.00075 | 9.47E-03 | -  |  |
| TCONS_00038987 | 13 | 96534691  | 35239 | 564 | -0.781 | 0.00005 | 9.26E-04 | -  |  |
| TCONS_00038989 | 13 | 96600561  | 14313 | 345 | -0.746 | 0.0009  | 1.10E-02 | -  |  |
| TCONS_00039674 | 13 | 50599107  | 27309 | 480 | -0.8   | 0.0001  | 1.72E-03 | -  |  |
| TCONS_00040321 | 13 | 83220252  | 18495 | 336 | -1.028 | 0.0002  | 3.15E-03 | -  |  |
| TCONS_00040647 | 13 | 96570192  | 30070 | 435 | -0.828 | 0.0001  | 1.72E-03 | -  |  |
| TCONS_00041524 | 13 | 43037730  | 4612  | 609 | -1.45  | 0.0004  | 5.66E-03 | -  |  |
| TCONS_00042411 | 13 | 96497261  | 37282 | 393 | -0.765 | 0.00005 | 9.26E-04 | -  |  |
| TCONS_00042412 | 13 | 96618810  | 13300 | 339 | -0.924 | 0.00015 | 2.46E-03 | -  |  |
| TCONS_00042413 | 13 | 96632166  | 6889  | 186 | -0.976 | 0.0002  | 3.15E-03 | -  |  |
| TCONS_00042415 | 13 | 96647161  | 9293  | 441 | -0.93  | 0.0003  | 4.46E-03 | -  |  |
| TCONS_00042936 | 13 | 113673075 | 506   | 72  |        | 0.00005 | 9.26E-04 | -  |  |
| TCONS_00044564 | 14 | 101135664 | 2253  | 378 | -1.092 | 0.00005 | 9.26E-04 | -  |  |
| TCONS_00047657 | 14 | 59815944  | 549   | 36  |        | 0.0006  | 7.89E-03 | -  |  |
| TCONS_00047802 | 14 | 61495690  | 4285  | 213 | -1.419 | 0.00055 | 7.37E-03 | -  |  |
| TCONS_00048750 | 15 | 2034397   | 25001 | 432 | -1.349 | 0.00005 | 9.26E-04 | -  |  |
| TCONS_00048751 | 15 | 2136151   | 7485  | 249 | -1.087 | 0.00015 | 2.46E-03 | -  |  |
| TCONS_00048752 | 15 | 2185121   | 12237 | 375 | -1.067 | 0.00005 | 9.26E-04 | -  |  |
| TCONS_00048754 | 15 | 2247245   | 11831 | 339 | -1.12  | 0.00005 | 9.26E-04 | -  |  |
| TCONS_00048755 | 15 | 2294539   | 43495 | 408 | -1.15  | 0.00005 | 9.26E-04 | -  |  |
| TCONS_00048980 | 15 | 15985366  | 40115 | 432 | -0.615 | 0.0005  | 6.80E-03 | -  |  |
| TCONS_00048981 | 15 | 16035004  | 18862 | 435 | -0.746 | 0.00005 | 9.26E-04 | -  |  |
| TCONS_00048984 | 15 | 16159303  | 38165 | 579 | -0.736 | 0.00005 | 9.26E-04 | -  |  |
| TCONS_00048987 | 15 | 16226726  | 6492  | 201 | -0.957 | 0.00005 | 9.26E-04 | -  |  |
| TCONS_00048990 | 15 | 16299385  | 13265 | 249 | -0.906 | 0.00005 | 9.26E-04 | -  |  |
| TCONS_00048991 | 15 | 16337989  | 41650 | 489 | -0.845 | 0.00005 | 9.26E-04 | -  |  |
| TCONS_00050273 | 15 | 106428599 | 5396  | 423 | -1.012 | 0.0007  | 8.95E-03 | -  |  |
| TCONS_00050325 | 15 | 344359    | 44256 | 375 | -1.428 | 0.00005 | 9.26E-04 | U6 |  |
| TCONS_00050332 | 15 | 2143726   | 35079 | 531 | -0.974 | 0.00005 | 9.26E-04 | -  |  |
| TCONS_00050618 | 15 | 16055517  | 40094 | 354 | -0.727 | 0.00065 | 8.43E-03 | -  |  |
| TCONS_00050621 | 15 | 16233519  | 49038 | 348 | -0.835 | 0.00005 | 9.26E-04 | -  |  |
| TCONS_00050622 | 15 | 16312721  | 19918 | 294 | -0.699 | 0.0002  | 3.15E-03 | -  |  |
| TCONS_00050623 | 15 | 16332697  | 4974  | 357 | -1.046 | 0.00005 | 9.26E-04 | -  |  |
| TCONS_00051962 | 15 | 106679271 | 36629 | 348 | -0.679 | 0.0003  | 4.46E-03 | -  |  |
| TCONS_00052098 | 15 | 2059448   | 4037  | 207 | -1.282 | 0.00075 | 9.47E-03 | -  |  |
| TCONS_00052101 | 15 | 2077751   | 17357 | 282 | -1.255 | 0.00005 | 9.26E-04 | -  |  |
| TCONS_00052103 | 15 | 2105398   | 20273 | 282 | -1.096 | 0.00005 | 9.26E-04 | -  |  |
| TCONS_00052104 | 15 | 2125728   | 9248  | 555 | -1.356 | 0.00005 | 9.26E-04 | -  |  |
| TCONS_00052108 | 15 | 2209564   | 9082  | 324 | -0.932 | 0.00055 | 7.37E-03 | -  |  |
| TCONS_00052109 | 15 | 2218730   | 15018 | 273 | -1.179 | 0.00005 | 9.26E-04 | -  |  |
| TCONS_00052114 | 15 | 2259144   | 35237 | 492 | -1.025 | 0.00005 | 9.26E-04 | -  |  |
| TCONS_00052397 | 15 | 16283172  | 9700  | 297 | -0.8   | 0.00015 | 2.46E-03 | -  |  |
| TCONS_00052398 | 15 | 16294935  | 3345  | 240 | -1.18  | 0.0001  | 1.72E-03 | -  |  |
| TCONS_00052400 | 15 | 16379758  | 27166 | 300 | -0.674 | 0.0003  | 4.46E-03 | -  |  |
| TCONS_00052417 | 15 | 16443872  | 5597  | 231 | -1.12  | 0.0001  | 1.72E-03 | -  |  |
| TCONS_00052427 | 15 | 16466301  | 3567  | 264 | -1.288 | 0.00025 | 3.82E-03 | -  |  |
| TCONS_00052437 | 15 | 16487739  | 2935  | 120 | -1.278 | 0.0008  | 9.98E-03 | -  |  |
| TCONS_00057346 | 16 | 20471466  | 10347 | 573 | -1.168 | 0.00005 | 9.26E-04 | -  |  |
| TCONS_00057603 | 16 | 36450175  | 858   | 201 | -1.057 | 0.00005 | 9.26E-04 | -  |  |
| TCONS_00062001 | 17 | 80327861  | 4776  | 381 | -1.432 | 0.00005 | 9.26E-04 | -  |  |

|                |    |           |        |     |        |         |          |            |  |
|----------------|----|-----------|--------|-----|--------|---------|----------|------------|--|
| TCONS_00062002 | 17 | 80342001  | 2456   | 195 | -1.57  | 0.00005 | 9.26E-04 | -          |  |
| TCONS_00062003 | 17 | 80344523  | 18622  | 330 | -1.329 | 0.00005 | 9.26E-04 | -          |  |
| TCONS_00062004 | 17 | 80372233  | 12019  | 315 | -1.223 | 0.00005 | 9.26E-04 | -          |  |
| TCONS_00062030 | 17 | 81633170  | 45251  | 492 | -1.117 | 0.0004  | 5.66E-03 | -          |  |
| TCONS_00062412 | 17 | 6566077   | 4466   | 408 | -1.32  | 0.0001  | 1.72E-03 | -          |  |
| TCONS_00062779 | 17 | 19120143  | 4915   | 297 | -1.144 | 0.00005 | 9.26E-04 | -          |  |
| TCONS_00062797 | 17 | 22265797  | 27900  | 591 | -0.776 | 0.00035 | 5.07E-03 | -          |  |
| TCONS_00063022 | 17 | 36943674  | 3102   | 240 | -1.175 | 0.0008  | 9.98E-03 | -          |  |
| TCONS_00063667 | 17 | 66062646  | 461    | 21  |        | 0.0006  | 7.89E-03 | -          |  |
| TCONS_00063910 | 17 | 78013543  | 6770   | 483 | -1.196 | 0.0001  | 1.72E-03 | -          |  |
| TCONS_00063921 | 17 | 78040824  | 2998   | 300 | -1.626 | 0.00045 | 6.24E-03 | -          |  |
| TCONS_00063927 | 17 | 78056421  | 5354   | 207 | -1.076 | 0.00065 | 8.43E-03 | -          |  |
| TCONS_00063931 | 17 | 78069790  | 6441   | 342 | -1.209 | 0.0005  | 6.80E-03 | -          |  |
| TCONS_00063977 | 17 | 80332736  | 7186   | 387 | -1.14  | 0.00005 | 9.26E-04 | -          |  |
| TCONS_00066314 | 18 | 52689366  | 9224   | 324 | -0.914 | 0.00055 | 7.37E-03 | -          |  |
| TCONS_00066402 | 18 | 56957425  | 21792  | 486 | -1.037 | 0.00005 | 9.26E-04 | Mir143     |  |
| TCONS_00066726 | 18 | 76653223  | 8032   | 594 | -0.821 | 0.0006  | 7.89E-03 | -          |  |
| TCONS_00067195 | 18 | 16968572  | 5282   | 252 | -1.103 | 0.00005 | 9.26E-04 | -          |  |
| TCONS_00067196 | 18 | 16973961  | 3657   | 282 | -0.95  | 0.0004  | 5.66E-03 | -          |  |
| TCONS_00068281 | 18 | 61982507  | 3399   | 321 | -1.398 | 0.00065 | 8.43E-03 | -          |  |
| TCONS_00069596 | 19 | 47082273  | 61310  | 615 | -0.936 | 0.00015 | 2.46E-03 | -          |  |
| TCONS_00069597 | 19 | 47159236  | 115423 | 516 | -0.928 | 0.00005 | 9.26E-04 | -          |  |
| TCONS_00069599 | 19 | 47279272  | 16275  | 450 | -0.85  | 0.0005  | 6.80E-03 | -          |  |
| TCONS_00069601 | 19 | 47306274  | 4969   | 453 | -0.912 | 0.0007  | 8.95E-03 | -          |  |
| TCONS_00069603 | 19 | 47313675  | 52382  | 486 | -0.93  | 0.00005 | 9.26E-04 | -          |  |
| TCONS_00069604 | 19 | 47366559  | 6199   | 369 | -1.279 | 0.00005 | 9.26E-04 | -          |  |
| TCONS_00069606 | 19 | 47411063  | 9976   | 360 | -1.019 | 0.00005 | 9.26E-04 | -          |  |
| TCONS_00069607 | 19 | 47421312  | 50570  | 618 | -0.878 | 0.00005 | 9.26E-04 | -          |  |
| TCONS_00069614 | 19 | 49249926  | 11954  | 315 | -0.846 | 0.0003  | 4.46E-03 | -          |  |
| TCONS_00070400 | 19 | 25774142  | 1473   | 303 | 0.602  | 0.00035 | 5.07E-03 | AC120246.2 |  |
| TCONS_00070730 | 19 | 40408425  | 14471  | 357 | -0.957 | 0.00005 | 9.26E-04 | -          |  |
| TCONS_00070731 | 19 | 40423412  | 28237  | 306 | -0.772 | 0.00005 | 9.26E-04 | -          |  |
| TCONS_00070929 | 19 | 47143859  | 10152  | 378 | -0.936 | 0.00005 | 9.26E-04 | -          |  |
| TCONS_00071634 | 19 | 32047934  | 6625   | 312 | -1.7   | 0.00005 | 9.26E-04 | -          |  |
| TCONS_00071635 | 19 | 32057417  | 2651   | 156 | -2.615 | 0.00075 | 9.47E-03 | -          |  |
| TCONS_00071636 | 19 | 32060963  | 7336   | 465 | -1.934 | 0.00005 | 9.26E-04 | -          |  |
| TCONS_00071908 | 19 | 47071818  | 10064  | 291 | -0.934 | 0.00005 | 9.26E-04 | -          |  |
| TCONS_00071911 | 19 | 47373166  | 7495   | 363 | -1.257 | 0.00005 | 9.26E-04 | -          |  |
| TCONS_00071915 | 19 | 47394238  | 3640   | 243 | -1.348 | 0.00005 | 9.26E-04 | -          |  |
| TCONS_00071916 | 19 | 47398093  | 9387   | 393 | -1.25  | 0.00005 | 9.26E-04 | -          |  |
| TCONS_00071919 | 19 | 47483896  | 15262  | 462 | -1.143 | 0.00005 | 9.26E-04 | -          |  |
| TCONS_00071924 | 19 | 47512002  | 9522   | 405 | -1.03  | 0.00005 | 9.26E-04 | -          |  |
| TCONS_00071925 | 19 | 47521592  | 3833   | 282 | -1.287 | 0.00055 | 7.37E-03 | -          |  |
| TCONS_00076924 | 2  | 39135042  | 10052  | 351 | -0.759 | 0.00005 | 9.26E-04 | -          |  |
| TCONS_00079779 | 2  | 242954128 | 4605   | 273 | -1.985 | 0.00005 | 9.26E-04 | -          |  |
| TCONS_00080582 | 2  | 13546549  | 1357   | 132 | -1.396 | 0.00005 | 9.26E-04 | -          |  |
| TCONS_00080922 | 2  | 33870358  | 493    | 51  |        | 0.0001  | 1.72E-03 | -          |  |
| TCONS_00082260 | 2  | 110470653 | 4324   | 243 | -1.061 | 0.0008  | 9.98E-03 | -          |  |
| TCONS_00083214 | 2  | 155586709 | 7051   | 399 | -1.046 | 0.00045 | 6.24E-03 | -          |  |
| TCONS_00083231 | 2  | 155620619 | 3717   | 297 | -1.877 | 0.0004  | 5.66E-03 | -          |  |
| TCONS_00083235 | 2  | 155628719 | 9654   | 294 | -1.524 | 0.00005 | 9.26E-04 | -          |  |
| TCONS_00083236 | 2  | 155638881 | 2744   | 228 | -1.467 | 0.0006  | 7.89E-03 | -          |  |
| TCONS_00083266 | 2  | 155680959 | 4398   | 261 | -1.421 | 0.00055 | 7.37E-03 | -          |  |

|                |    |           |        |      |        |         |          |       |  |
|----------------|----|-----------|--------|------|--------|---------|----------|-------|--|
| TCONS_00083681 | 2  | 184309976 | 3031   | 192  | -1.302 | 0.00055 | 7.37E-03 | -     |  |
| TCONS_00083838 | 2  | 193541171 | 468    | 87   |        | 0.0002  | 3.15E-03 | -     |  |
| TCONS_00083945 | 2  | 197939916 | 1518   | 204  | -0.656 | 0.00065 | 8.43E-03 | -     |  |
| TCONS_00084590 | 2  | 239325332 | 524    | 75   |        | 0.00005 | 9.26E-04 | -     |  |
| TCONS_00084638 | 2  | 242930076 | 3410   | 306  | -2.261 | 0.0001  | 1.72E-03 | -     |  |
| TCONS_00084644 | 2  | 242940054 | 563    | 69   |        | 0.00005 | 9.26E-04 | -     |  |
| TCONS_00084647 | 2  | 242949566 | 3523   | 171  | -1.607 | 0.00085 | 1.05E-02 | -     |  |
| TCONS_00084656 | 2  | 242976396 | 6990   | 414  | -1.333 | 0.00005 | 9.26E-04 | -     |  |
| TCONS_00084657 | 2  | 242983908 | 2233   | 144  | -1.245 | 0.0005  | 6.80E-03 | -     |  |
| TCONS_00086062 | 20 | 18688024  | 6833   | 216  | -0.809 | 0.0001  | 1.72E-03 | -     |  |
| TCONS_00086065 | 20 | 18738902  | 14112  | 1059 | -0.841 | 0.00005 | 9.26E-04 | -     |  |
| TCONS_00086066 | 20 | 18753079  | 11326  | 645  | -0.772 | 0.0007  | 8.95E-03 | -     |  |
| TCONS_00088710 | 20 | 26214326  | 3173   | 216  | -1.47  | 0.00035 | 5.07E-03 | -     |  |
| TCONS_00089908 | 3  | 10705386  | 5160   | 291  | -1.131 | 0.00095 | 1.14E-02 | -     |  |
| TCONS_00092768 | 3  | 158600785 | 5547   | 300  | -1.119 | 0.00005 | 9.26E-04 | -     |  |
| TCONS_00092769 | 3  | 158607066 | 14301  | 309  | -0.796 | 0.0003  | 4.46E-03 | -     |  |
| TCONS_00092921 | 3  | 162285259 | 24535  | 537  | -0.973 | 0.0004  | 5.66E-03 | -     |  |
| TCONS_00093005 | 3  | 166467656 | 66872  | 582  | -0.929 | 0.0002  | 3.15E-03 | -     |  |
| TCONS_00094099 | 3  | 21953114  | 2985   | 198  | -1.193 | 0.0002  | 3.15E-03 | -     |  |
| TCONS_00096278 | 3  | 139333856 | 51531  | 447  | -0.964 | 0.0002  | 3.15E-03 | -     |  |
| TCONS_00097078 | 3  | 165360737 | 2114   | 330  | -1.704 | 0.00005 | 9.26E-04 | -     |  |
| TCONS_00097079 | 3  | 165365024 | 9676   | 528  | -1.328 | 0.00005 | 9.26E-04 | -     |  |
| TCONS_00097213 | 3  | 175763331 | 5806   | 354  | -1.174 | 0.00005 | 9.26E-04 | Mir1b |  |
| TCONS_00100042 | 3  | 158462506 | 4184   | 438  | -1.232 | 0.00055 | 7.37E-03 | -     |  |
| TCONS_00100048 | 3  | 158476564 | 6827   | 438  | -0.978 | 0.00045 | 6.24E-03 | -     |  |
| TCONS_00100051 | 3  | 158486557 | 7142   | 270  | -1.196 | 0.0001  | 1.72E-03 | -     |  |
| TCONS_00100072 | 3  | 158585562 | 6544   | 243  | -0.884 | 0.00065 | 8.43E-03 | -     |  |
| TCONS_00100197 | 3  | 165363063 | 1732   | 300  | -1.7   | 0.00005 | 9.26E-04 | -     |  |
| TCONS_00100455 | 3  | 174997178 | 791    | 168  |        | 0.00005 | 9.26E-04 | -     |  |
| TCONS_00100513 | 3  | 175773797 | 1551   | 447  | -1.726 | 0.00085 | 1.05E-02 | -     |  |
| TCONS_00100514 | 3  | 175775624 | 3045   | 228  | -1.682 | 0.00005 | 9.26E-04 | -     |  |
| TCONS_00100516 | 3  | 175789571 | 4526   | 261  | -2.183 | 0.00005 | 9.26E-04 | -     |  |
| TCONS_00101393 | 4  | 58340153  | 33512  | 399  | -1.171 | 0.00035 | 5.07E-03 | -     |  |
| TCONS_00101398 | 4  | 58631346  | 8794   | 270  | -0.92  | 0.0006  | 7.89E-03 | -     |  |
| TCONS_00102703 | 4  | 140623983 | 5316   | 246  | -1.389 | 0.00005 | 9.26E-04 | -     |  |
| TCONS_00102882 | 4  | 146374809 | 8132   | 375  | -1.353 | 0.00005 | 9.26E-04 | -     |  |
| TCONS_00103030 | 4  | 152026384 | 16545  | 627  | -0.994 | 0.00005 | 9.26E-04 | -     |  |
| TCONS_00103433 | 4  | 168527521 | 11300  | 432  | -0.788 | 0.00005 | 9.26E-04 | -     |  |
| TCONS_00103434 | 4  | 168539534 | 10532  | 480  | -0.808 | 0.00005 | 9.26E-04 | -     |  |
| TCONS_00103517 | 4  | 171595598 | 13375  | 354  | -0.878 | 0.00005 | 9.26E-04 | -     |  |
| TCONS_00103518 | 4  | 171609077 | 4832   | 264  | -1.24  | 0.00005 | 9.26E-04 | -     |  |
| TCONS_00105564 | 4  | 125684691 | 160392 | 495  | -0.942 | 0.00025 | 3.82E-03 | -     |  |
| TCONS_00106489 | 4  | 171591955 | 3545   | 243  | -1.306 | 0.0002  | 3.15E-03 | -     |  |
| TCONS_00106491 | 4  | 171614193 | 19991  | 495  | -0.832 | 0.00005 | 9.26E-04 | -     |  |
| TCONS_00106492 | 4  | 171634259 | 11204  | 294  | -0.769 | 0.0001  | 1.72E-03 | -     |  |
| TCONS_00107906 | 4  | 58644743  | 8474   | 441  | -1.027 | 0.00005 | 9.26E-04 | -     |  |
| TCONS_00107907 | 4  | 58653486  | 7065   | 261  | -1.043 | 0.00035 | 5.07E-03 | -     |  |
| TCONS_00109024 | 4  | 128224313 | 3780   | 183  | -1.286 | 0.00075 | 9.47E-03 | -     |  |
| TCONS_00109042 | 4  | 128289254 | 3007   | 318  | -2.204 | 0.00065 | 8.43E-03 | -     |  |
| TCONS_00109043 | 4  | 128292323 | 4205   | 282  | -1.607 | 0.00045 | 6.24E-03 | -     |  |
| TCONS_00109044 | 4  | 128296579 | 8144   | 333  | -1.377 | 0.00005 | 9.26E-04 | -     |  |
| TCONS_00109046 | 4  | 128309564 | 5631   | 414  | -1.435 | 0.00005 | 9.26E-04 | -     |  |
| TCONS_00109048 | 4  | 128315750 | 8091   | 351  | -1.133 | 0.0003  | 4.46E-03 | -     |  |

|                |   |           |       |      |        |         |          |                |  |
|----------------|---|-----------|-------|------|--------|---------|----------|----------------|--|
| TCONS_00109582 | 4 | 151959192 | 834   | 189  |        | 0.00005 | 9.26E-04 | -              |  |
| TCONS_00109614 | 4 | 152042984 | 11907 | 408  | -1.007 | 0.00005 | 9.26E-04 | -              |  |
| TCONS_00109691 | 4 | 160663181 | 3404  | 318  | -0.947 | 0.0005  | 6.80E-03 | -              |  |
| TCONS_00109693 | 4 | 160668191 | 5654  | 468  | -0.894 | 0.0002  | 3.15E-03 | -              |  |
| TCONS_00109739 | 4 | 162573744 | 1285  | 240  | -1.576 | 0.00005 | 9.26E-04 | -              |  |
| TCONS_00109861 | 4 | 167676992 | 2722  | 228  | -1.128 | 0.0001  | 1.72E-03 | -              |  |
| TCONS_00110396 | 5 | 8215405   | 19572 | 432  | -1.334 | 0.00005 | 9.26E-04 | -              |  |
| TCONS_00110510 | 5 | 21769344  | 22967 | 480  | -0.941 | 0.00035 | 5.07E-03 | -              |  |
| TCONS_00110511 | 5 | 21769344  | 27403 | 603  | -1.129 | 0.0006  | 7.89E-03 | -              |  |
| TCONS_00111588 | 5 | 113458805 | 812   | 99   |        | 0.00005 | 9.26E-04 | -              |  |
| TCONS_00111662 | 5 | 117862703 | 7319  | 240  | -1.027 | 0.0005  | 6.80E-03 | -              |  |
| TCONS_00112434 | 5 | 142118250 | 6188  | 474  | -0.947 | 0.00025 | 3.82E-03 | -              |  |
| TCONS_00112435 | 5 | 142140448 | 15871 | 294  | -0.697 | 0.00075 | 9.47E-03 | -              |  |
| TCONS_00113300 | 5 | 160939712 | 4868  | 282  | -1.212 | 0.00045 | 6.24E-03 | -              |  |
| TCONS_00113306 | 5 | 160954079 | 9771  | 570  | -0.965 | 0.0003  | 4.46E-03 | -              |  |
| TCONS_00113308 | 5 | 160969418 | 21754 | 390  | -0.747 | 0.00025 | 3.82E-03 | -              |  |
| TCONS_00113309 | 5 | 160991323 | 12596 | 354  | -0.779 | 0.0009  | 1.10E-02 | -              |  |
| TCONS_00113310 | 5 | 161004033 | 15448 | 522  | -0.872 | 0.00005 | 9.26E-04 | -              |  |
| TCONS_00114812 | 5 | 74584886  | 10260 | 591  | -0.953 | 0.0005  | 6.80E-03 | -              |  |
| TCONS_00115076 | 5 | 91124669  | 3947  | 726  | 0.841  | 0.00005 | 9.26E-04 | 5_8S_rRNA      |  |
| TCONS_00116878 | 5 | 166934541 | 17141 | 519  | -0.87  | 0.00005 | 9.26E-04 | -              |  |
| TCONS_00118195 | 5 | 63127856  | 608   | 75   |        | 0.00005 | 9.26E-04 | -              |  |
| TCONS_00119583 | 5 | 142124505 | 8266  | 303  | -0.915 | 0.00005 | 9.26E-04 | -              |  |
| TCONS_00119584 | 5 | 142158770 | 31395 | 390  | -0.905 | 0.00005 | 9.26E-04 | -              |  |
| TCONS_00119587 | 5 | 142203501 | 8871  | 291  | -1.062 | 0.00015 | 2.46E-03 | -              |  |
| TCONS_00120451 | 6 | 6570377   | 11593 | 540  | -0.649 | 0.00035 | 5.07E-03 | -              |  |
| TCONS_00120903 | 6 | 30627930  | 1598  | 189  | 0.733  | 0.00005 | 9.26E-04 | 5_8S_rRNA      |  |
| TCONS_00121897 | 6 | 103364181 | 39015 | 348  | -1.249 | 0.00005 | 9.26E-04 | AC118496.1     |  |
| TCONS_00123074 | 6 | 6584464   | 12059 | 255  | -0.702 | 0.0001  | 1.72E-03 | -              |  |
| TCONS_00123279 | 6 | 25262284  | 3839  | 228  | -1.251 | 0.0009  | 1.10E-02 | -              |  |
| TCONS_00123625 | 6 | 43185055  | 3997  | 282  | -0.925 | 0.0008  | 9.98E-03 | -              |  |
| TCONS_00125707 | 6 | 9736700   | 21652 | 741  | -0.898 | 0.00005 | 9.26E-04 | -              |  |
| TCONS_00126696 | 6 | 61180390  | 6096  | 333  | -0.932 | 0.0009  | 1.10E-02 | -              |  |
| TCONS_00126700 | 6 | 61202188  | 5375  | 207  | -0.942 | 0.0007  | 8.95E-03 | -              |  |
| TCONS_00127431 | 6 | 95163447  | 13970 | 573  | -0.73  | 0.0006  | 7.89E-03 | -              |  |
| TCONS_00127816 | 6 | 105160707 | 8232  | 342  | -0.753 | 0.00095 | 1.14E-02 | -              |  |
| TCONS_00130846 | 7 | 123786501 | 3439  | 435  | -1.332 | 0.00075 | 9.47E-03 | -              |  |
| TCONS_00133701 | 7 | 114851069 | 18280 | 429  | -0.981 | 0.00005 | 9.26E-04 | -              |  |
| TCONS_00136140 | 7 | 52612694  | 561   | 141  |        | 0.00015 | 2.46E-03 | -              |  |
| TCONS_00136728 | 7 | 75184464  | 5754  | 258  | -0.774 | 0.00005 | 9.26E-04 | -              |  |
| TCONS_00136983 | 7 | 92497283  | 1949  | 279  | -0.959 | 0.00005 | 9.26E-04 | -              |  |
| TCONS_00137802 | 7 | 137645621 | 2653  | 237  | -1.974 | 0.00075 | 9.47E-03 | -              |  |
| TCONS_00137869 | 7 | 140662782 | 558   | 90   |        | 0.00005 | 9.26E-04 | -              |  |
| TCONS_00138740 | 8 | 44342449  | 7157  | 288  | -1.151 | 0.00005 | 9.26E-04 | -              |  |
| TCONS_00138742 | 8 | 44354220  | 10763 | 405  | -1.359 | 0.00005 | 9.26E-04 | -              |  |
| TCONS_00138761 | 8 | 45607484  | 16808 | 471  | -0.799 | 0.0002  | 3.15E-03 | -              |  |
| TCONS_00139274 | 8 | 63758031  | 37388 | 345  | -0.69  | 0.0002  | 3.15E-03 | -              |  |
| TCONS_00139337 | 8 | 64811940  | 32314 | 429  | -1.16  | 0.0004  | 5.66E-03 | -              |  |
| TCONS_00139650 | 8 | 75108985  | 2152  | 189  | -1.306 | 0.00035 | 5.07E-03 | -              |  |
| TCONS_00139757 | 8 | 77826298  | 1823  | 156  | -0.912 | 0.0009  | 1.10E-02 | -              |  |
| TCONS_00139923 | 8 | 85186549  | 36463 | 438  | -0.739 | 0.0001  | 1.72E-03 | -              |  |
| TCONS_00141112 | 8 | 162675    | 1272  | 210  | 1.09   | 0.00005 | 9.26E-04 | -              |  |
| TCONS_00141592 | 8 | 26651222  | 52493 | 3591 | -0.862 | 0.0001  | 1.72E-03 | AABR07069524.1 |  |

|                |   |           |       |     |        |         |          |   |  |
|----------------|---|-----------|-------|-----|--------|---------|----------|---|--|
| TCONS_00141835 | 8 | 44328120  | 14029 | 300 | -0.869 | 0.00005 | 9.26E-04 | - |  |
| TCONS_00141837 | 8 | 44381195  | 7946  | 273 | -0.924 | 0.00005 | 9.26E-04 | - |  |
| TCONS_00141838 | 8 | 44389523  | 9962  | 330 | -0.937 | 0.00005 | 9.26E-04 | - |  |
| TCONS_00142601 | 8 | 69466800  | 8263  | 351 | -1.026 | 0.00025 | 3.82E-03 | - |  |
| TCONS_00142735 | 8 | 73195276  | 61117 | 516 | -0.705 | 0.00005 | 9.26E-04 | - |  |
| TCONS_00142764 | 8 | 75439357  | 16113 | 429 | -0.695 | 0.0006  | 7.89E-03 | - |  |
| TCONS_00142765 | 8 | 75455714  | 12509 | 345 | -0.715 | 0.0008  | 9.98E-03 | - |  |
| TCONS_00142766 | 8 | 75469543  | 29463 | 453 | -0.809 | 0.00005 | 9.26E-04 | - |  |
| TCONS_00142869 | 8 | 80742773  | 59339 | 423 | -0.638 | 0.00035 | 5.07E-03 | - |  |
| TCONS_00143785 | 8 | 127603421 | 11038 | 285 | -0.793 | 0.00005 | 9.26E-04 | - |  |
| TCONS_00144469 | 8 | 30650546  | 1085  | 84  |        | 0.00005 | 9.26E-04 | - |  |
| TCONS_00144892 | 8 | 44350342  | 3588  | 267 | -1.275 | 0.00005 | 9.26E-04 | - |  |
| TCONS_00145149 | 8 | 52794526  | 4958  | 231 | -1.043 | 0.0009  | 1.10E-02 | - |  |
| TCONS_00145643 | 8 | 75117588  | 4254  | 462 | -1.219 | 0.00005 | 9.26E-04 | - |  |
| TCONS_00145675 | 8 | 77805548  | 12687 | 315 | -0.878 | 0.0002  | 3.15E-03 | - |  |
| TCONS_00145677 | 8 | 77820507  | 4275  | 348 | -0.898 | 0.0009  | 1.10E-02 | - |  |
| TCONS_00145836 | 8 | 85256907  | 2317  | 204 | -1.07  | 0.00005 | 9.26E-04 | - |  |
| TCONS_00146188 | 8 | 105742920 | 5151  | 309 | -1.107 | 0.0005  | 6.80E-03 | - |  |
| TCONS_00146193 | 8 | 105760458 | 6804  | 291 | -0.95  | 0.0003  | 4.46E-03 | - |  |
| TCONS_00149694 | 9 | 27844925  | 45506 | 459 | -1.132 | 0.00005 | 9.26E-04 | - |  |
| TCONS_00149700 | 9 | 27925341  | 13514 | 426 | -1.249 | 0.00005 | 9.26E-04 | - |  |
| TCONS_00149701 | 9 | 27943951  | 35453 | 477 | -0.973 | 0.00005 | 9.26E-04 | - |  |
| TCONS_00149702 | 9 | 27943951  | 19746 | 387 | -1.1   | 0.00005 | 9.26E-04 | - |  |
| TCONS_00149703 | 9 | 28005854  | 12540 | 369 | -1.268 | 0.00005 | 9.26E-04 | - |  |
| TCONS_00149704 | 9 | 28018578  | 28068 | 294 | -1.223 | 0.00005 | 9.26E-04 | - |  |
| TCONS_00149705 | 9 | 28046888  | 79518 | 570 | -1.076 | 0.00005 | 9.26E-04 | - |  |
| TCONS_00150429 | 9 | 76031683  | 6590  | 267 | -0.996 | 0.00065 | 8.43E-03 | - |  |
| TCONS_00151710 | 9 | 27821863  | 5744  | 285 | -1.634 | 0.00005 | 9.26E-04 | - |  |
| TCONS_00151721 | 9 | 27916744  | 8490  | 417 | -1.005 | 0.00005 | 9.26E-04 | - |  |
| TCONS_00151722 | 9 | 27939236  | 2498  | 327 | -1.053 | 0.00005 | 9.26E-04 | - |  |
| TCONS_00152523 | 9 | 76015427  | 15849 | 267 | -0.853 | 0.00035 | 5.07E-03 | - |  |
| TCONS_00153022 | 9 | 99513680  | 2596  | 162 | -1.427 | 0.0001  | 1.72E-03 | - |  |
| TCONS_00154182 | X | 26635190  | 30840 | 555 | -0.669 | 0.00015 | 2.46E-03 | - |  |
| TCONS_00154183 | X | 26675170  | 20874 | 273 | -0.66  | 0.00015 | 2.46E-03 | - |  |
| TCONS_00154297 | X | 34313311  | 15948 | 735 | -0.676 | 0.0003  | 4.46E-03 | - |  |
| TCONS_00154299 | X | 34367098  | 29916 | 387 | -0.643 | 0.00035 | 5.07E-03 | - |  |
| TCONS_00154300 | X | 34399276  | 26918 | 423 | -0.754 | 0.00005 | 9.26E-04 | - |  |
| TCONS_00154302 | X | 34426464  | 41510 | 300 | -0.712 | 0.00005 | 9.26E-04 | - |  |
| TCONS_00154303 | X | 34468103  | 23150 | 480 | -0.91  | 0.00005 | 9.26E-04 | - |  |
| TCONS_00156113 | X | 26696434  | 11083 | 261 | -1.014 | 0.00005 | 9.26E-04 | - |  |
| TCONS_00156114 | X | 26707992  | 60343 | 564 | -0.76  | 0.00005 | 9.26E-04 | - |  |
| TCONS_00156115 | X | 26773818  | 16368 | 507 | -0.93  | 0.00005 | 9.26E-04 | - |  |
| TCONS_00156116 | X | 26791349  | 15715 | 309 | -0.755 | 0.0002  | 3.15E-03 | - |  |
| TCONS_00156117 | X | 26827030  | 18213 | 720 | -0.738 | 0.00005 | 9.26E-04 | - |  |
| TCONS_00158250 | X | 26768514  | 5087  | 207 | -0.772 | 0.00095 | 1.14E-02 | - |  |
| TCONS_00158251 | X | 26807137  | 18856 | 306 | -0.643 | 0.00065 | 8.43E-03 | - |  |
| TCONS_00158354 | X | 34517348  | 20425 | 351 | -0.744 | 0.00025 | 3.82E-03 | - |  |
| TCONS_00159070 | X | 75048034  | 13903 | 297 | -0.953 | 0.00005 | 9.26E-04 | - |  |
| TCONS_00159564 | X | 105611105 | 980   | 117 |        | 0.00005 | 9.26E-04 | - |  |



**Supplemental Table S9**

**Site Table lncRNA Prostate Stromal Epithelial Overlaps (p<0.001)**

| test_id        | Chr | Start     | Gene           | Category |
|----------------|-----|-----------|----------------|----------|
| TCONS_00000097 | 1   | 8126655   | -              |          |
| TCONS_00000104 | 1   | 8255913   | -              |          |
| TCONS_00005960 | 1   | 249591548 | -              |          |
| TCONS_00005961 | 1   | 249596765 | -              |          |
| TCONS_00005962 | 1   | 249645239 | -              |          |
| TCONS_00005963 | 1   | 249695987 | -              |          |
| TCONS_00005965 | 1   | 249735066 | -              |          |
| TCONS_00006920 | 1   | 14132251  | -              |          |
| TCONS_00006935 | 1   | 14180975  | -              |          |
| TCONS_00007020 | 1   | 20966066  | -              |          |
| TCONS_00007021 | 1   | 20989996  | -              |          |
| TCONS_00012578 | 1   | 249789640 | -              |          |
| TCONS_00012833 | 1   | 261854669 | -              |          |
| TCONS_00017668 | 1   | 249628639 | -              |          |
| TCONS_00017669 | 1   | 249665572 | -              |          |
| TCONS_00017670 | 1   | 249722776 | -              |          |
| TCONS_00025682 | 10  | 101696383 | -              |          |
| TCONS_00025683 | 10  | 101708032 | -              |          |
| TCONS_00025957 | 10  | 107939842 | -              |          |
| TCONS_00028247 | 10  | 107926884 | -              |          |
| TCONS_00030911 | 11  | 69426747  | -              |          |
| TCONS_00030912 | 11  | 69452557  | -              |          |
| TCONS_00033925 | 12  | 15362330  | -              |          |
| TCONS_00033927 | 12  | 15400657  | -              |          |
| TCONS_00035673 | 12  | 15259395  | -              |          |
| TCONS_00036032 | 12  | 28381981  | Rn60_12_0305.1 |          |
| TCONS_00037143 | 12  | 15426684  | -              |          |
| TCONS_00038987 | 13  | 96534691  | -              |          |
| TCONS_00039674 | 13  | 50599107  | -              |          |
| TCONS_00042412 | 13  | 96618810  | -              |          |
| TCONS_00044564 | 14  | 101135664 | -              |          |
| TCONS_00048755 | 15  | 2294539   | -              |          |
| TCONS_00048980 | 15  | 15985366  | -              |          |
| TCONS_00048981 | 15  | 16035004  | -              |          |
| TCONS_00048984 | 15  | 16159303  | -              |          |
| TCONS_00048987 | 15  | 16226726  | -              |          |
| TCONS_00048991 | 15  | 16337989  | -              |          |
| TCONS_00050618 | 15  | 16055517  | -              |          |
| TCONS_00050621 | 15  | 16233519  | -              |          |
| TCONS_00052109 | 15  | 2218730   | -              |          |

|                |    |           |            |  |
|----------------|----|-----------|------------|--|
| TCONS_00052114 | 15 | 2259144   | -          |  |
| TCONS_00052397 | 15 | 16283172  | -          |  |
| TCONS_00062030 | 17 | 81633170  | -          |  |
| TCONS_00066402 | 18 | 56957425  | Mir143     |  |
| TCONS_00069597 | 19 | 47159236  | -          |  |
| TCONS_00069603 | 19 | 47313675  | -          |  |
| TCONS_00069606 | 19 | 47411063  | -          |  |
| TCONS_00069607 | 19 | 47421312  | -          |  |
| TCONS_00070929 | 19 | 47143859  | -          |  |
| TCONS_00071911 | 19 | 47373166  | -          |  |
| TCONS_00076924 | 2  | 39135042  | -          |  |
| TCONS_00086062 | 20 | 18688024  | -          |  |
| TCONS_00086065 | 20 | 18738902  | -          |  |
| TCONS_00086066 | 20 | 18753079  | -          |  |
| TCONS_00093005 | 3  | 166467656 | -          |  |
| TCONS_00096278 | 3  | 139333856 | -          |  |
| TCONS_00097078 | 3  | 165360737 | -          |  |
| TCONS_00097079 | 3  | 165365024 | -          |  |
| TCONS_00097213 | 3  | 175763331 | Mir1b      |  |
| TCONS_00100514 | 3  | 175775624 | -          |  |
| TCONS_00103433 | 4  | 168527521 | -          |  |
| TCONS_00103434 | 4  | 168539534 | -          |  |
| TCONS_00103517 | 4  | 171595598 | -          |  |
| TCONS_00105564 | 4  | 125684691 | -          |  |
| TCONS_00106491 | 4  | 171614193 | -          |  |
| TCONS_00106492 | 4  | 171634259 | -          |  |
| TCONS_00116878 | 5  | 166934541 | -          |  |
| TCONS_00121897 | 6  | 103364181 | AC118496.1 |  |
| TCONS_00123074 | 6  | 6584464   | -          |  |
| TCONS_00133701 | 7  | 114851069 | -          |  |
| TCONS_00136983 | 7  | 92497283  | -          |  |
| TCONS_00138742 | 8  | 44354220  | -          |  |
| TCONS_00139337 | 8  | 64811940  | -          |  |
| TCONS_00139923 | 8  | 85186549  | -          |  |
| TCONS_00141837 | 8  | 44381195  | -          |  |
| TCONS_00141838 | 8  | 44389523  | -          |  |
| TCONS_00142735 | 8  | 73195276  | -          |  |
| TCONS_00144892 | 8  | 44350342  | -          |  |
| TCONS_00145836 | 8  | 85256907  | -          |  |
| TCONS_00149700 | 9  | 27925341  | -          |  |
| TCONS_00149701 | 9  | 27943951  | -          |  |
| TCONS_00149702 | 9  | 27943951  | -          |  |
| TCONS_00149703 | 9  | 28005854  | -          |  |

|                |   |          |   |  |
|----------------|---|----------|---|--|
| TCONS_00149704 | 9 | 28018578 | - |  |
| TCONS_00149705 | 9 | 28046888 | - |  |
| TCONS_00151721 | 9 | 27916744 | - |  |
| TCONS_00154183 | X | 26675170 | - |  |
| TCONS_00154297 | X | 34313311 | - |  |
| TCONS_00156113 | X | 26696434 | - |  |
| TCONS_00156114 | X | 26707992 | - |  |

## Supplemental Table S10

### Site Table mRNA Prostate Epithelial (p<0.001)

| test_id        | Chr | Start     | log2.fold_change. | p_value  | q_value  | Gene       | Category           |
|----------------|-----|-----------|-------------------|----------|----------|------------|--------------------|
| TCONS_00000077 | 1   | 7101714   | 0.778             | 2.00E-04 | 3.15E-03 | Sf3b5      | Translation        |
| TCONS_00000193 | 1   | 13164649  |                   | 5.00E-05 | 9.26E-04 | -          |                    |
| TCONS_00000239 | 1   | 14224392  | 0.661             | 2.00E-04 | 3.15E-03 | Perp       | Apoptosis          |
| TCONS_00000693 | 1   | 39729055  | 0.917             | 5.00E-04 | 6.80E-03 | Ppp1r14c   | Signaling          |
| TCONS_00001123 | 1   | 59700063  | -1.006            | 9.00E-04 | 1.10E-02 | LOC688452  | Unknown            |
| TCONS_00001353 | 1   | 70210799  | -1.59             | 6.00E-04 | 7.89E-03 | Peg3       | Transcription      |
| TCONS_00001407 | 1   | 72624704  | 1.442             | 5.00E-05 | 9.26E-04 | Tmem238    |                    |
| TCONS_00001542 | 1   | 78417718  | 1.103             | 6.50E-04 | 8.43E-03 | Tmem160    | Unknown            |
| TCONS_00001546 | 1   | 78671120  | 0.708             | 8.50E-04 | 1.05E-02 | Ap2s1      | Transport          |
| TCONS_00001571 | 1   | 78818398  | -1.417            | 5.00E-05 | 9.26E-04 | Gng8       | Signaling          |
| TCONS_00001738 | 1   | 81750927  | 0.651             | 2.00E-04 | 3.15E-03 | Rps19      | Translation        |
| TCONS_00002540 | 1   | 101692972 | 0.754             | 7.00E-04 | 8.95E-03 | Rpl18      | Transcription      |
| TCONS_00002547 | 1   | 101859345 | 0.694             | 2.50E-04 | 3.82E-03 | Kdelr1     |                    |
| TCONS_00002873 | 1   | 134699031 | -1.671            | 4.50E-04 | 6.24E-03 | Rgma       |                    |
| TCONS_00002934 | 1   | 139890559 | -2.088            | 5.50E-04 | 7.37E-03 | Ntrk3      | Receptor           |
| TCONS_00003148 | 1   | 154371720 | -0.82             | 3.00E-04 | 4.46E-03 | Picalm     | Transport          |
| TCONS_00003328 | 1   | 165549343 | 1.132             | 4.00E-04 | 5.66E-03 | Coa4       |                    |
| TCONS_00003512 | 1   | 168945448 | -1.687            | 5.00E-05 | 9.26E-04 | AC113925.2 |                    |
| TCONS_00004364 | 1   | 199412833 | -1.027            | 2.00E-04 | 3.15E-03 | Fus        |                    |
| TCONS_00004389 | 1   | 199941160 | -1.155            | 1.50E-04 | 2.46E-03 | Bag3       | Apoptosis          |
| TCONS_00004790 | 1   | 214375514 | 0.709             | 2.50E-04 | 3.82E-03 | Taldo1     | Metabolism         |
| TCONS_00005019 | 1   | 219439952 | 0.705             | 2.00E-04 | 3.15E-03 | Ppp1ca     | Signaling          |
| TCONS_00005400 | 1   | 225163390 | 0.82              | 5.00E-05 | 9.26E-04 | Eef1g      | Translation        |
| TCONS_00005597 | 1   | 228142777 | 0.898             | 1.50E-04 | 2.46E-03 | Mrpl16     | Transcription      |
| TCONS_00005858 | 1   | 246954979 | 0.773             | 7.50E-04 | 9.47E-03 | Slc1a1     | Metabolism         |
| TCONS_00005982 | 1   | 251145252 | 1.425             | 7.50E-04 | 9.47E-03 | Papss2     | Metabolism         |
| TCONS_00006008 | 1   | 252894662 | -0.899            | 2.00E-04 | 3.15E-03 | Ifit2      | Immune             |
| TCONS_00006143 | 1   | 259739912 | -1.342            | 5.00E-05 | 9.26E-04 | Entpd1     | Metabolism         |
| TCONS_00006190 | 1   | 261158260 | 0.648             | 9.50E-04 | 1.14E-02 | Pgam1      | Metabolism         |
| TCONS_00006293 | 1   | 264738844 | 0.98              | 8.00E-04 | 9.98E-03 | Sema4g     | Signaling          |
| TCONS_00007156 | 1   | 31527645  | 0.915             | 5.00E-05 | 9.26E-04 | Rpl26-ps2  |                    |
| TCONS_00007360 | 1   | 41608165  | -1.033            | 5.00E-05 | 9.26E-04 | Syne1      | Development        |
| TCONS_00007820 | 1   | 65660469  | 0.61              | 6.00E-04 | 7.89E-03 | Rps5       | Translation        |
| TCONS_00008249 | 1   | 80549042  | 0.773             | 5.00E-05 | 9.26E-04 | Clptm1     | Development        |
| TCONS_00008810 | 1   | 92703079  | -0.76             | 9.50E-04 | 1.14E-02 | Tshz3      | Transcription      |
| TCONS_00008855 | 1   | 98472744  | 0.932             | 5.00E-05 | 9.26E-04 | Etfb       |                    |
| TCONS_00009561 | 1   | 141561333 | 0.913             | 5.00E-05 | 9.26E-04 | Anpep      | Metabolism         |
| TCONS_00009675 | 1   | 143661520 | -1.374            | 5.00E-05 | 9.26E-04 | Hdgfrp3    |                    |
| TCONS_00009724 | 1   | 148469770 |                   | 5.00E-05 | 9.26E-04 | -          |                    |
| TCONS_00009919 | 1   | 164435877 | 0.627             | 1.50E-04 | 2.46E-03 | Rps3       | Translation        |
| TCONS_00010120 | 1   | 168971273 | -1.94             | 5.00E-05 | 9.26E-04 | Hbb        | Metabolism         |
| TCONS_00010229 | 1   | 170652293 | 0.843             | 5.00E-05 | 9.26E-04 | Mrpl17     | Transcription      |
| TCONS_00010546 | 1   | 188394813 | 0.911             | 3.00E-04 | 4.46E-03 | Gde1       | Metabolism         |
| TCONS_00011118 | 1   | 207887208 | -1.706            | 5.00E-05 | 9.26E-04 | Ptpre      | Signaling          |
| TCONS_00011166 | 1   | 209522876 | -1.221            | 2.00E-04 | 3.15E-03 | Ebf3       |                    |
| TCONS_00011360 | 1   | 215541541 | 0.636             | 5.00E-05 | 9.26E-04 | Ctsd       | Protease           |
| TCONS_00011656 | 1   | 219254278 | 0.718             | 9.50E-04 | 1.14E-02 | Ndufv1     | Metabolism         |
| TCONS_00012084 | 1   | 222466574 | 0.697             | 2.50E-04 | 3.82E-03 | Cox8a      | Electron Transport |
| TCONS_00012495 | 1   | 242493522 | -1.961            | 6.00E-04 | 7.89E-03 | Pgm5       | Metabolism         |

|                |    |           |        |          |          |              |                 |
|----------------|----|-----------|--------|----------|----------|--------------|-----------------|
| TCONS_00012534 | 1  | 246380829 | -2.248 | 5.00E-05 | 9.26E-04 | Glis3        | Transcription   |
| TCONS_00012622 | 1  | 252154183 | -2.218 | 5.00E-05 | 9.26E-04 | LOC100360690 |                 |
| TCONS_00012623 | 1  | 252154183 | -2.155 | 5.00E-05 | 9.26E-04 | LOC100360690 |                 |
| TCONS_00012629 | 1  | 252429676 | -1.507 | 5.00E-05 | 9.26E-04 | Ankrd22      | Transcription   |
| TCONS_00012909 | 1  | 264160128 | 0.862  | 7.50E-04 | 9.47E-03 | Scd1         | Metabolism      |
| TCONS_00013007 | 1  | 266422131 | 2.446  | 5.00E-05 | 9.26E-04 | Cyp17a1      | Metabolism      |
| TCONS_00013033 | 1  | 267039345 | -1.438 | 5.00E-05 | 9.26E-04 | Sh3pxd2a     | Development     |
| TCONS_00013253 | 1  | 282238772 | 0.769  | 3.50E-04 | 5.07E-03 | Prdx3        | Metabolism      |
| TCONS_00014701 | 1  | 62401784  |        | 5.00E-05 | 9.26E-04 | -            |                 |
| TCONS_00015104 | 1  | 92076800  |        | 1.00E-04 | 1.72E-03 | -            |                 |
| TCONS_00015595 | 1  | 126359019 |        | 3.50E-04 | 5.07E-03 | -            |                 |
| TCONS_00016339 | 1  | 169135347 |        | 5.00E-05 | 9.26E-04 | -            |                 |
| TCONS_00016498 | 1  | 178433655 |        | 9.50E-04 | 1.14E-02 | -            |                 |
| TCONS_00017144 | 1  | 221170983 |        | 1.50E-04 | 2.46E-03 | -            |                 |
| TCONS_00017291 | 1  | 225803232 |        | 1.00E-04 | 1.72E-03 | -            |                 |
| TCONS_00017936 | 1  | 264824102 |        | 5.00E-05 | 9.26E-04 | -            |                 |
| TCONS_00018040 | 1  | 276942527 |        | 5.00E-05 | 9.26E-04 | -            |                 |
| TCONS_00018377 | 10 | 5344802   |        | 5.00E-05 | 9.26E-04 | -            |                 |
| TCONS_00018677 | 10 | 14105749  | 0.805  | 5.00E-04 | 6.80E-03 | Msrb1        | Metabolism      |
| TCONS_00018875 | 10 | 18558127  | -2.42  | 5.00E-05 | 9.26E-04 | Kcnmb1       | Metabolism      |
| TCONS_00018897 | 10 | 19924555  | -1.691 | 3.00E-04 | 4.46E-03 | SNORA17      |                 |
| TCONS_00018908 | 10 | 23658713  | -1.42  | 5.00E-05 | 9.26E-04 | Ebf1         | Transcription   |
| TCONS_00019004 | 10 | 34149716  | 0.74   | 5.00E-05 | 9.26E-04 | Gnb2l1       | Signaling       |
| TCONS_00019192 | 10 | 37215936  | 0.803  | 2.00E-04 | 3.15E-03 | Sar1b        | Development     |
| TCONS_00019197 | 10 | 37422646  | 0.684  | 9.00E-04 | 1.10E-02 | Cdkn2aipnl   | Cell Cycle      |
| TCONS_00019212 | 10 | 37724914  | 0.757  | 5.00E-05 | 9.26E-04 | Vdac1        | Transport       |
| TCONS_00019287 | 10 | 39786637  | -1.137 | 5.00E-05 | 9.26E-04 | Fnip1        |                 |
| TCONS_00019590 | 10 | 49000972  | -3.856 | 4.50E-04 | 6.24E-03 | LOC102553715 |                 |
| TCONS_00019843 | 10 | 56601287  | 0.765  | 5.00E-05 | 9.26E-04 | Gabarap      | Cytoskeleton    |
| TCONS_00019897 | 10 | 57131385  | 0.836  | 4.50E-04 | 6.24E-03 | Psmb6        | Proteolysis     |
| TCONS_00020306 | 10 | 66099530  | 1.282  | 7.50E-04 | 9.47E-03 | Lym9         |                 |
| TCONS_00020839 | 10 | 82352389  | 0.921  | 5.00E-05 | 9.26E-04 | Lrrc59       | Development     |
| TCONS_00020878 | 10 | 83476106  | 0.669  | 9.50E-04 | 1.14E-02 | Phb          | Transcription   |
| TCONS_00020917 | 10 | 84031954  | 0.762  | 4.00E-04 | 5.66E-03 | Hoxb13       | Transcription   |
| TCONS_00021025 | 10 | 85978690  | 0.612  | 3.00E-04 | 4.46E-03 | Rpl19        | Translation     |
| TCONS_00021455 | 10 | 91710494  | 0.616  | 2.50E-04 | 3.82E-03 | Rprml        |                 |
| TCONS_00022022 | 10 | 109658031 | 0.773  | 7.50E-04 | 9.47E-03 | Mrpl12       | Translation     |
| TCONS_00022716 | 10 | 15577248  | -1.785 | 1.00E-04 | 1.72E-03 | Hba2         |                 |
| TCONS_00022718 | 10 | 15577248  | -1.727 | 5.00E-05 | 9.26E-04 | Hba1         |                 |
| TCONS_00022822 | 10 | 19715274  | 0.834  | 9.50E-04 | 1.14E-02 | RGD1564698   |                 |
| TCONS_00022864 | 10 | 25903910  | 0.625  | 8.50E-04 | 1.05E-02 | Ccng1        | Signaling       |
| TCONS_00022909 | 10 | 32055192  | -1.993 | 2.00E-04 | 3.15E-03 | Sgcd         | Cytoskeleton    |
| TCONS_00023109 | 10 | 38779131  | 0.831  | 4.50E-04 | 6.24E-03 | Uqcrq        | Proteolysis     |
| TCONS_00023189 | 10 | 40790844  | 0.712  | 5.50E-04 | 7.37E-03 | Atox1        | Metabolism      |
| TCONS_00023287 | 10 | 45559577  | 0.614  | 2.50E-04 | 3.82E-03 | Arf1         | Signaling       |
| TCONS_00023554 | 10 | 51679225  | -0.923 | 5.00E-05 | 9.26E-04 | Myocd        | Transcription   |
| TCONS_00023770 | 10 | 56953690  | -1.44  | 5.00E-05 | 9.26E-04 | Alox15       | Metabolism      |
| TCONS_00024157 | 10 | 65839897  | -0.588 | 8.00E-04 | 9.98E-03 | Nlk          | Signaling       |
| TCONS_00024545 | 10 | 78992579  | 0.73   | 2.00E-04 | 3.15E-03 | LOC100363469 |                 |
| TCONS_00024559 | 10 | 81648215  | 0.66   | 1.50E-04 | 2.46E-03 | Nme2         | Metabolism      |
| TCONS_00024700 | 10 | 83895946  | 0.938  | 4.50E-04 | 6.24E-03 | Atp5g1       | Metabolism      |
| TCONS_00025229 | 10 | 90351899  | 0.735  | 5.00E-05 | 9.26E-04 | Slc25a39     | Binding Protein |
| TCONS_00025764 | 10 | 104521699 | 0.68   | 8.50E-04 | 1.05E-02 | LOC100360679 | Translation     |

|                |    |           |        |          |          |         |                 |
|----------------|----|-----------|--------|----------|----------|---------|-----------------|
| TCONS_00025900 | 10 | 106817600 | 0.699  | 7.50E-04 | 9.47E-03 | Tk1     | Signaling       |
| TCONS_00026041 | 10 | 109736457 | 0.699  | 5.00E-05 | 9.26E-04 | P4hb    | Metabolism      |
| TCONS_00026157 | 10 | 110251362 | 0.883  | 8.50E-04 | 1.05E-02 | Sectm1b | Development     |
| TCONS_00026341 | 10 | 6831349   |        | 7.00E-04 | 8.95E-03 | -       |                 |
| TCONS_00026626 | 10 | 27629913  |        | 8.00E-04 | 9.98E-03 | -       |                 |
| TCONS_00026937 | 10 | 37259498  |        | 9.50E-04 | 1.14E-02 | -       |                 |
| TCONS_00027245 | 10 | 53569623  |        | 4.00E-04 | 5.66E-03 | -       |                 |
| TCONS_00028056 | 10 | 101271075 |        | 2.00E-04 | 3.15E-03 | -       |                 |
| TCONS_00028206 | 10 | 105495218 |        | 7.00E-04 | 8.95E-03 | -       |                 |
| TCONS_00028520 | 11 | 27004319  | 1.353  | 2.00E-04 | 3.15E-03 | N6amt1  | Transcription   |
| TCONS_00028698 | 11 | 33909438  | 0.795  | 5.00E-05 | 9.26E-04 | Cbr3    | Metabolism      |
| TCONS_00029227 | 11 | 61028596  | -0.922 | 5.50E-04 | 7.37E-03 | Boc     | Receptor        |
| TCONS_00029332 | 11 | 66316605  | 2.065  | 1.00E-04 | 1.72E-03 | Stxbp5l | Transcription   |
| TCONS_00029430 | 11 | 70034138  | 1.047  | 6.50E-04 | 8.43E-03 | Umps    | Metabolism      |
| TCONS_00029649 | 11 | 82465916  | -1.029 | 2.00E-04 | 3.15E-03 | Igf2bp2 | Transcription   |
| TCONS_00029856 | 11 | 88047831  | 0.606  | 6.00E-04 | 7.89E-03 | Ube2l3  | Metabolism      |
| TCONS_00029860 | 11 | 88122270  | 0.744  | 8.00E-04 | 9.98E-03 | Sdf2l1  | Transcription   |
| TCONS_00030788 | 11 | 64962665  | 0.62   | 9.50E-04 | 1.14E-02 | Cox17   | Binding Protein |
| TCONS_00030834 | 11 | 67004036  | 0.757  | 4.50E-04 | 6.24E-03 | lldr1   |                 |
| TCONS_00031122 | 11 | 78015459  | -1.526 | 5.00E-05 | 9.26E-04 | P3h2    |                 |
| TCONS_00031486 | 11 | 90403332  | -1.354 | 2.00E-04 | 3.15E-03 | Snai2   | Transcription   |
| TCONS_00032978 | 11 | 68854216  |        | 1.00E-04 | 1.72E-03 | -       |                 |
| TCONS_00033057 | 11 | 74247681  |        | 8.00E-04 | 9.98E-03 | -       |                 |
| TCONS_00033213 | 11 | 80177406  |        | 7.50E-04 | 9.47E-03 | -       |                 |
| TCONS_00034231 | 12 | 23544286  | 1.051  | 5.00E-05 | 9.26E-04 | Orai2   | Metabolism      |
| TCONS_00034684 | 12 | 40466494  | 1.037  | 5.00E-05 | 9.26E-04 | Aldh2   | Metabolism      |
| TCONS_00034915 | 12 | 47667555  | 0.754  | 1.00E-04 | 1.72E-03 | Gltp    | Metabolism      |
| TCONS_00035179 | 12 | 2452760   |        | 5.00E-05 | 9.26E-04 | -       |                 |
| TCONS_00035920 | 12 | 23839398  | -1.013 | 3.00E-04 | 4.46E-03 | Hspb1   | Signaling       |
| TCONS_00035923 | 12 | 23941447  | 0.635  | 3.50E-04 | 5.07E-03 | Mdh2    | Metabolism      |
| TCONS_00036076 | 12 | 30532648  | 0.621  | 6.00E-04 | 7.89E-03 | Gbas    | Transport       |
| TCONS_00036104 | 12 | 31134800  | -2.253 | 5.00E-05 | 9.26E-04 | Adgrd1  |                 |
| TCONS_00036135 | 12 | 36512392  | 0.885  | 8.50E-04 | 1.05E-02 | Aacs    | Metabolism      |
| TCONS_00036169 | 12 | 37471259  | 0.668  | 5.00E-05 | 9.26E-04 | Tmed2   | Metabolism      |
| TCONS_00037229 | 12 | 19545265  |        | 4.00E-04 | 5.66E-03 | -       |                 |
| TCONS_00037347 | 12 | 30679048  |        | 9.50E-04 | 1.14E-02 | -       |                 |
| TCONS_00037405 | 12 | 31503205  |        | 4.50E-04 | 6.24E-03 | -       |                 |
| TCONS_00037440 | 12 | 37912394  |        | 5.00E-05 | 9.26E-04 | -       |                 |
| TCONS_00037981 | 13 | 47564129  | 0.98   | 5.00E-05 | 9.26E-04 | Pigr    | Receptor        |
| TCONS_00038555 | 13 | 77940453  | 0.876  | 8.50E-04 | 1.05E-02 | Mrps14  | Translation     |
| TCONS_00038759 | 13 | 87966747  | -0.938 | 4.00E-04 | 5.66E-03 | Rgs5    | Signaling       |
| TCONS_00039281 | 13 | 1931824   | -0.925 | 8.00E-04 | 9.98E-03 | Dsel    | Metabolism      |
| TCONS_00039358 | 13 | 26605425  | -1.098 | 5.00E-05 | 9.26E-04 | Bcl2    | Signaling       |
| TCONS_00039401 | 13 | 34829128  | -1.195 | 5.00E-05 | 9.26E-04 | Gli2    | Transcription   |
| TCONS_00039995 | 13 | 70566320  | -1.44  | 3.50E-04 | 5.07E-03 | Lamc2   | Cytoskeleton    |
| TCONS_00040274 | 13 | 81147347  | -1.009 | 8.50E-04 | 1.05E-02 | Prrx1   | Transcription   |
| TCONS_00040333 | 13 | 83434957  | 0.694  | 8.50E-04 | 1.05E-02 | Sft2d2  |                 |
| TCONS_00040426 | 13 | 88311637  | -1.255 | 2.50E-04 | 3.82E-03 | Ddr2    | Receptor        |
| TCONS_00040598 | 13 | 92894430  | -0.686 | 7.50E-04 | 9.47E-03 | Grem2   |                 |
| TCONS_00041085 | 13 | 12298490  | -1.611 | 7.50E-04 | 9.47E-03 | -       |                 |
| TCONS_00041125 | 13 | 20113463  |        | 7.50E-04 | 9.47E-03 | -       |                 |
| TCONS_00041184 | 13 | 24984331  |        | 2.50E-04 | 3.82E-03 | -       |                 |
| TCONS_00041637 | 13 | 47214749  |        | 2.50E-04 | 3.82E-03 | -       |                 |

|                |    |           |        |          |          |                    |                            |
|----------------|----|-----------|--------|----------|----------|--------------------|----------------------------|
| TCONS_00041936 | 13 | 70653858  |        | 7.00E-04 | 8.95E-03 | -                  |                            |
| TCONS_00042643 | 13 | 102101365 |        | 4.00E-04 | 5.66E-03 | -                  |                            |
| TCONS_00043358 | 14 | 17143002  | -1     | 3.00E-04 | 4.46E-03 | Cxcl10             | Growth Factors & Cytokines |
| TCONS_00043458 | 14 | 22091776  | -1.324 | 3.00E-04 | 4.46E-03 | Sult1d1            | Metabolism                 |
| TCONS_00043474 | 14 | 22706900  | 0.799  | 5.00E-05 | 9.26E-04 | LOC100360977       |                            |
| TCONS_00043619 | 14 | 37113209  | -0.75  | 5.50E-04 | 7.37E-03 | Sgcb               | Cytoskeleton               |
| TCONS_00043758 | 14 | 44413635  | 0.638  | 2.00E-04 | 3.15E-03 | Smim14             |                            |
| TCONS_00044431 | 14 | 86673774  | 0.614  | 3.00E-04 | 4.46E-03 | Ppia               |                            |
| TCONS_00044606 | 14 | 106008085 | -1.25  | 2.00E-04 | 3.15E-03 | Peli1              | Signaling                  |
| TCONS_00044851 | 14 | 2860964   | 0.561  | 6.00E-04 | 7.89E-03 | Rpl5               | Translation                |
| TCONS_00045119 | 14 | 14912342  | -1.373 | 6.50E-04 | 8.43E-03 | Mrpl1              | Translation                |
| TCONS_00045209 | 14 | 18743684  | -1.305 | 9.50E-04 | 1.14E-02 | Cxcl1              | Growth Factors & Cytokines |
| TCONS_00045210 | 14 | 18743684  | -1.288 | 5.00E-05 | 9.26E-04 | Cxcl1              | Growth Factors & Cytokines |
| TCONS_00045933 | 14 | 63004406  | -1.1   | 5.00E-05 | 9.26E-04 | Ppargc1a           | Receptor                   |
| TCONS_00046118 | 14 | 80678466  | -1.859 | 9.50E-04 | 1.14E-02 | ENSRNOG00000054319 |                            |
| TCONS_00046389 | 14 | 85947764  | 0.747  | 8.50E-04 | 1.05E-02 | Mrps24             | Translation                |
| TCONS_00046585 | 14 | 103181280 | -1.258 | 5.00E-05 | 9.26E-04 | Meis1              | Transcription              |
| TCONS_00046636 | 14 | 106378941 | 0.759  | 5.00E-05 | 9.26E-04 | Mdh1               | Metabolism                 |
| TCONS_00046703 | 14 | 108485712 | -1.505 | 2.00E-04 | 3.15E-03 | Rel                | Transcription              |
| TCONS_00046982 | 14 | 10945101  |        | 5.00E-05 | 9.26E-04 | -                  |                            |
| TCONS_00046989 | 14 | 10988205  |        | 5.00E-05 | 9.26E-04 | -                  |                            |
| TCONS_00047184 | 14 | 21279479  |        | 1.50E-04 | 2.46E-03 | -                  |                            |
| TCONS_00047300 | 14 | 31407992  |        | 7.00E-04 | 8.95E-03 | -                  |                            |
| TCONS_00047306 | 14 | 31421935  |        | 4.00E-04 | 5.66E-03 | -                  |                            |
| TCONS_00047493 | 14 | 45399028  |        | 1.00E-04 | 1.72E-03 | -                  |                            |
| TCONS_00047555 | 14 | 51599869  |        | 2.00E-04 | 3.15E-03 | -                  |                            |
| TCONS_00048902 | 15 | 8188608   | 0.832  | 9.50E-04 | 1.14E-02 | Rpl15              | Translation                |
| TCONS_00049249 | 15 | 30555098  | -1.334 | 5.00E-05 | 9.26E-04 | AABR07017745.4     |                            |
| TCONS_00049624 | 15 | 38340990  | -1.058 | 3.00E-04 | 4.46E-03 | Fgf9               | Growth Factors & Cytokines |
| TCONS_00049693 | 15 | 42640145  | -1.212 | 5.00E-05 | 9.26E-04 | Clu                | Apoptosis                  |
| TCONS_00049733 | 15 | 44799333  | -0.978 | 2.00E-04 | 3.15E-03 | Nefl               | Cytoskeleton               |
| TCONS_00049823 | 15 | 51065315  | 1.859  | 5.00E-05 | 9.26E-04 | Nkx3-1             |                            |
| TCONS_00049912 | 15 | 57175880  | 0.728  | 5.00E-05 | 9.26E-04 | Lcp1               | Metabolism                 |
| TCONS_00050210 | 15 | 104026600 | 1.798  | 5.00E-05 | 9.26E-04 | Cldn10             | Cell Junction              |
| TCONS_00050293 | 15 | 108526013 | 0.602  | 5.00E-04 | 6.80E-03 | Tm9sf2             | Unknown                    |
| TCONS_00050638 | 15 | 18532360  | 0.717  | 6.00E-04 | 7.89E-03 | AABR07072440.1     |                            |
| TCONS_00050924 | 15 | 32868086  | 0.627  | 4.50E-04 | 6.24E-03 | Dad1               | Metabolism                 |
| TCONS_00050951 | 15 | 33259042  | 0.675  | 7.00E-04 | 8.95E-03 | Psmb5              | Protease                   |
| TCONS_00051893 | 15 | 95507639  | -0.922 | 5.00E-05 | 9.26E-04 | Slitrk6            | Receptor                   |
| TCONS_00052874 | 15 | 42559007  |        | 2.00E-04 | 3.15E-03 | -                  |                            |
| TCONS_00053510 | 15 | 71737620  |        | 6.50E-04 | 8.43E-03 | -                  |                            |
| TCONS_00053523 | 15 | 73654074  |        | 8.00E-04 | 9.98E-03 | -                  |                            |
| TCONS_00053879 | 15 | 92038576  |        | 8.00E-04 | 9.98E-03 | -                  |                            |
| TCONS_00054393 | 16 | 7212487   | 0.909  | 5.00E-04 | 6.80E-03 | Nt5dc2             | Metabolism                 |
| TCONS_00054435 | 16 | 8280274   | 1.22   | 5.00E-05 | 9.26E-04 | Msemb              |                            |
| TCONS_00054716 | 16 | 20293228  | 0.697  | 5.00E-05 | 9.26E-04 | Rpl18a             | Translation                |
| TCONS_00055236 | 16 | 61954589  | -1.685 | 5.00E-05 | 9.26E-04 | Rbpms              | Transcription              |
| TCONS_00055242 | 16 | 61954589  | -1.366 | 5.00E-05 | 9.26E-04 | Rbpms              | Transcription              |
| TCONS_00055635 | 16 | 83824429  | -1.962 | 5.00E-05 | 9.26E-04 | Irs2               | Unknown                    |
| TCONS_00056465 | 16 | 49543141  | -1.558 | 5.00E-05 | 9.26E-04 | Pdlim3             | Cytoskeleton               |
| TCONS_00056633 | 16 | 62452521  | -0.745 | 1.00E-04 | 1.72E-03 | Purg               | Signaling                  |
| TCONS_00056664 | 16 | 68954860  | 0.649  | 7.00E-04 | 8.95E-03 | Eif4ebp1           | Transcription              |
| TCONS_00058904 | 17 | 9653560   | -1.056 | 7.00E-04 | 8.95E-03 | Pdlim7             | Receptor                   |

|                |    |           |        |          |          |                |                    |
|----------------|----|-----------|--------|----------|----------|----------------|--------------------|
| TCONS_00058989 | 17 | 11953521  | -1.64  | 1.00E-04 | 1.72E-03 | Ror2           | Signaling          |
| TCONS_00059391 | 17 | 32902964  | 0.813  | 5.00E-05 | 9.26E-04 | Serpinb1a      | Proteolysis        |
| TCONS_00059444 | 17 | 35677983  | 0.622  | 4.50E-04 | 6.24E-03 | Uqcrfs1        | Metabolism         |
| TCONS_00060183 | 17 | 81352699  | -1.114 | 9.50E-04 | 1.14E-02 | Mrc1           | Receptor           |
| TCONS_00060191 | 17 | 81633170  | -2.194 | 5.00E-05 | 9.26E-04 | Cacnb2         | Transport          |
| TCONS_00060201 | 17 | 82065936  | -0.856 | 4.50E-04 | 6.24E-03 | Arl5b          | Translation        |
| TCONS_00060701 | 17 | 10558713  | 0.805  | 5.00E-04 | 6.80E-03 | Higd2a         | Apoptosis          |
| TCONS_00060921 | 17 | 22136756  | -1.218 | 5.00E-05 | 9.26E-04 | Edn1           | Signaling          |
| TCONS_00061033 | 17 | 29672817  | -0.661 | 7.00E-04 | 8.95E-03 | Cdyl           | Metabolism         |
| TCONS_00061190 | 17 | 36713017  | 1.723  | 6.00E-04 | 7.89E-03 | Rn60_17_0381.1 |                    |
| TCONS_00061332 | 17 | 43807129  | 0.93   | 5.00E-05 | 9.26E-04 | LOC102549173   |                    |
| TCONS_00061334 | 17 | 43821224  | 1.076  | 5.00E-05 | 9.26E-04 | LOC680097      |                    |
| TCONS_00061485 | 17 | 54652450  | -1.399 | 1.00E-04 | 1.72E-03 | Zeb1           | Transcription      |
| TCONS_00062023 | 17 | 81171353  | -1.451 | 5.00E-05 | 9.26E-04 | Hacd1          |                    |
| TCONS_00062706 | 17 | 15656404  | 0.807  | 1.00E-04 | 1.72E-03 | -              |                    |
| TCONS_00062743 | 17 | 16954675  |        | 6.50E-04 | 8.43E-03 | -              |                    |
| TCONS_00065054 | 18 | 52917123  | 0.767  | 3.00E-04 | 4.46E-03 | Slc12a2        | Transport          |
| TCONS_00065110 | 18 | 56042378  | 0.571  | 7.50E-04 | 9.47E-03 | Rps14          | Translation        |
| TCONS_00065278 | 18 | 61490030  | 0.607  | 4.50E-04 | 6.24E-03 | Sec11c         | Protease           |
| TCONS_00065335 | 18 | 64113931  | 0.804  | 1.00E-04 | 1.72E-03 | Mc5r           | Receptor           |
| TCONS_00065435 | 18 | 71395829  | -0.99  | 2.50E-04 | 3.82E-03 | Smad7          | Signaling          |
| TCONS_00065476 | 18 | 74156552  | 0.707  | 1.00E-04 | 1.72E-03 | Atp5a1         | Metabolism         |
| TCONS_00065566 | 18 | 81694807  | 0.703  | 2.00E-04 | 3.15E-03 | Cyb5a          | Metabolism         |
| TCONS_00065704 | 18 | 4365428   | 0.879  | 5.00E-05 | 9.26E-04 | LOC100910109   |                    |
| TCONS_00065731 | 18 | 6833410   | 0.659  | 3.00E-04 | 4.46E-03 | Chst9          | Metabolism         |
| TCONS_00065768 | 18 | 15063078  | 0.997  | 2.50E-04 | 3.82E-03 | Mep1b          | Protease           |
| TCONS_00066131 | 18 | 31728372  | -0.964 | 9.00E-04 | 1.10E-02 | Nr3c1          | Transcription      |
| TCONS_00066269 | 18 | 47500329  | -0.653 | 8.50E-04 | 1.05E-02 | Lox            | Metabolism         |
| TCONS_00066306 | 18 | 51619006  | 0.834  | 5.00E-05 | 9.26E-04 | Aldh7a1        | Metabolism         |
| TCONS_00066702 | 18 | 74461054  | -1.113 | 1.00E-04 | 1.72E-03 | Slc14a1        | Metabolism         |
| TCONS_00067153 | 18 | 14754736  |        | 5.00E-05 | 9.26E-04 | -              |                    |
| TCONS_00067797 | 18 | 40803184  |        | 9.50E-04 | 1.14E-02 | -              |                    |
| TCONS_00067819 | 18 | 41275399  |        | 2.00E-04 | 3.15E-03 | -              |                    |
| TCONS_00068175 | 18 | 57420276  |        | 5.00E-05 | 9.26E-04 | -              |                    |
| TCONS_00068660 | 19 | 9587652   | 0.757  | 5.00E-05 | 9.26E-04 | Got2           | Metabolism         |
| TCONS_00069071 | 19 | 26084902  | 0.73   | 1.00E-04 | 1.72E-03 | Prdx2          | Electron Transport |
| TCONS_00069185 | 19 | 32112950  | -0.957 | 1.50E-04 | 2.46E-03 | Smad1          | Signaling          |
| TCONS_00069245 | 19 | 34109736  | -1.44  | 5.00E-05 | 9.26E-04 | Arhgap10       | Signaling          |
| TCONS_00069443 | 19 | 39357724  | 1.204  | 9.00E-04 | 1.10E-02 | Cyb5b          | Metabolism         |
| TCONS_00069659 | 19 | 52258946  | 1.052  | 4.50E-04 | 6.24E-03 | Adad2          | Transcription      |
| TCONS_00069938 | 19 | 61332350  | -1.072 | 7.00E-04 | 8.95E-03 | Nrp1           | Receptor           |
| TCONS_00070100 | 19 | 11300083  | -0.856 | 7.50E-04 | 9.47E-03 | Mt1            |                    |
| TCONS_00070103 | 19 | 11307966  | -1.177 | 5.00E-05 | 9.26E-04 | Mt2A           | Receptor           |
| TCONS_00071448 | 19 | 22010372  |        | 5.00E-05 | 9.26E-04 | -              |                    |
| TCONS_00071987 | 19 | 47629583  |        | 2.50E-04 | 3.82E-03 | -              |                    |
| TCONS_00072409 | 2  | 2605995   | 0.925  | 5.00E-05 | 9.26E-04 | Glrx           | Metabolism         |
| TCONS_00072610 | 2  | 20416754  | -0.87  | 6.50E-04 | 8.43E-03 | Ssbp2          | Transcription      |
| TCONS_00072976 | 2  | 45668968  | -0.726 | 5.50E-04 | 7.37E-03 | Arl15          | Signaling          |
| TCONS_00073373 | 2  | 84275883  | 0.744  | 5.00E-05 | 9.26E-04 | Dap            | Signaling          |
| TCONS_00073383 | 2  | 85377317  | -0.766 | 5.00E-05 | 9.26E-04 | Sema5a         | Signaling          |
| TCONS_00073602 | 2  | 115928376 |        | 5.00E-05 | 9.26E-04 | -              |                    |
| TCONS_00073976 | 2  | 142262235 | -1.442 | 5.00E-05 | 9.26E-04 | Lhfp           | Transcription      |
| TCONS_00074414 | 2  | 180857148 |        | 5.00E-05 | 9.26E-04 | -              |                    |



|                |    |           |        |          |          |                |                            |
|----------------|----|-----------|--------|----------|----------|----------------|----------------------------|
| TCONS_00074652 | 2  | 187951315 | 0.69   | 5.00E-05 | 9.26E-04 | Ssr2           | Receptor                   |
| TCONS_00075171 | 2  | 198380886 | 0.785  | 2.00E-04 | 3.15E-03 | AABR07012582.2 |                            |
| TCONS_00075181 | 2  | 198528001 |        | 7.00E-04 | 8.95E-03 | U1             |                            |
| TCONS_00075242 | 2  | 199775695 | -0.941 | 5.00E-05 | 9.26E-04 | Fmo5           | Metabolism                 |
| TCONS_00075350 | 2  | 205159922 | -1.683 | 5.00E-05 | 9.26E-04 | Tspan2         | Signaling                  |
| TCONS_00075420 | 2  | 206314212 | 1.478  | 5.00E-05 | 9.26E-04 | Bcl2l15        |                            |
| TCONS_00075501 | 2  | 209097926 | 1.378  | 1.00E-04 | 1.72E-03 | Dennd2d        |                            |
| TCONS_00075645 | 2  | 224851382 | 0.925  | 3.50E-04 | 5.07E-03 | Alg14          | Metabolism                 |
| TCONS_00075677 | 2  | 226899438 | -1.211 | 6.00E-04 | 7.89E-03 | Pde5a          | Metabolism                 |
| TCONS_00075680 | 2  | 227255106 | -2.144 | 5.00E-05 | 9.26E-04 | Synpo2         | Development                |
| TCONS_00075973 | 2  | 251533646 | -1.286 | 9.50E-04 | 1.14E-02 | AABR07013701.1 |                            |
| TCONS_00075978 | 2  | 251634430 | 1.051  | 5.00E-05 | 9.26E-04 | Ddah1          | Metabolism                 |
| TCONS_00076056 | 2  | 256609691 | -1.165 | 6.00E-04 | 7.89E-03 | Adgrl4         |                            |
| TCONS_00076655 | 2  | 30175017  | 0.771  | 5.00E-05 | 9.26E-04 | Mccc2          | Metabolism                 |
| TCONS_00077359 | 2  | 88097719  | 1.806  | 5.00E-05 | 9.26E-04 | Car2           | Metabolism                 |
| TCONS_00077401 | 2  | 93574558  | 1.112  | 5.00E-05 | 9.26E-04 | Chmp4c         | Epigenetic                 |
| TCONS_00077509 | 2  | 105016625 | -0.763 | 3.00E-04 | 4.46E-03 | Cpa3           | Proteolysis                |
| TCONS_00077562 | 2  | 115862455 | -1.925 | 7.50E-04 | 9.47E-03 | Skil           | Development                |
| TCONS_00077897 | 2  | 148718279 | 0.735  | 1.50E-04 | 2.46E-03 | Serp1          | Transcription              |
| TCONS_00078524 | 2  | 186330297 | 0.636  | 5.50E-04 | 7.37E-03 | Cd1d1          | Receptor                   |
| TCONS_00078601 | 2  | 187903300 | 0.93   | 5.00E-05 | 9.26E-04 | Rab25          | Signaling                  |
| TCONS_00079403 | 2  | 212696609 | -1.699 | 5.00E-05 | 9.26E-04 | -              |                            |
| TCONS_00079573 | 2  | 227255106 | -2.147 | 2.50E-04 | 3.82E-03 | Synpo2         | Development                |
| TCONS_00079681 | 2  | 235850333 | 0.881  | 5.00E-04 | 6.80E-03 | Rpl34          | Translation                |
| TCONS_00079763 | 2  | 240773455 | -1.926 | 1.50E-04 | 2.46E-03 | Nfkb1          | Transcription              |
| TCONS_00080468 | 2  | 7778858   |        | 5.00E-05 | 9.26E-04 | -              |                            |
| TCONS_00080531 | 2  | 11876743  |        | 2.00E-04 | 3.15E-03 | -              |                            |
| TCONS_00081296 | 2  | 53031029  |        | 5.00E-05 | 9.26E-04 | -              |                            |
| TCONS_00081341 | 2  | 56424619  |        | 7.50E-04 | 9.47E-03 | -              |                            |
| TCONS_00081525 | 2  | 65085570  |        | 9.00E-04 | 1.10E-02 | -              |                            |
| TCONS_00082380 | 2  | 112859219 |        | 9.50E-04 | 1.14E-02 | -              |                            |
| TCONS_00082792 | 2  | 128317812 |        | 5.00E-05 | 9.26E-04 | -              |                            |
| TCONS_00082810 | 2  | 128458061 |        | 4.00E-04 | 5.66E-03 | -              |                            |
| TCONS_00082906 | 2  | 139569408 |        | 8.50E-04 | 1.05E-02 | -              |                            |
| TCONS_00082916 | 2  | 139617773 |        | 9.00E-04 | 1.10E-02 | -              |                            |
| TCONS_00084676 | 2  | 243349916 |        | 6.50E-04 | 8.43E-03 | -              |                            |
| TCONS_00085430 | 20 | 4593317   | 0.754  | 5.00E-05 | 9.26E-04 | Slc44a4        | Metabolism                 |
| TCONS_00085914 | 20 | 11393876  | 0.769  | 5.50E-04 | 7.37E-03 | Pfkl           | Signaling                  |
| TCONS_00085999 | 20 | 13729562  | 0.876  | 5.00E-05 | 9.26E-04 | Mif            | Growth Factors & Cytokines |
| TCONS_00086278 | 20 | 28920615  | -1.745 | 5.00E-05 | 9.26E-04 | P4ha1          | Metabolism                 |
| TCONS_00086321 | 20 | 30682658  | 1.692  | 3.00E-04 | 4.46E-03 | Pcbd1          | Metabolism                 |
| TCONS_00086653 | 20 | 100942    |        | 5.00E-05 | 9.26E-04 | -              |                            |
| TCONS_00087297 | 20 | 7215674   | 0.908  | 5.00E-05 | 9.26E-04 | Rps10          | Translation                |
| TCONS_00087573 | 20 | 13665030  | 1.055  | 5.00E-05 | 9.26E-04 | Chchd10        |                            |
| TCONS_00087662 | 20 | 19358734  | -0.851 | 8.50E-04 | 1.05E-02 | -              |                            |
| TCONS_00087908 | 20 | 31456304  | -1.358 | 5.00E-05 | 9.26E-04 | Col13a1        | Extracellular Matrix       |
| TCONS_00088030 | 20 | 34571647  | -0.908 | 9.00E-04 | 1.10E-02 | Cep85l         | Epigenetic                 |
| TCONS_00089020 | 20 | 34702546  |        | 6.00E-04 | 7.89E-03 | -              |                            |
| TCONS_00089167 | 20 | 46872158  |        | 7.00E-04 | 8.95E-03 | -              |                            |
| TCONS_00089549 | 3  | 2781168   | 0.765  | 5.00E-05 | 9.26E-04 | Edf1           | Transcription              |
| TCONS_00089872 | 3  | 9044956   |        | 6.00E-04 | 7.89E-03 | -              |                            |
| TCONS_00090393 | 3  | 45211078  | -1.029 | 9.00E-04 | 1.10E-02 | -              |                            |
| TCONS_00090407 | 3  | 45538796  | 1.179  | 5.50E-04 | 7.37E-03 | Dapl1          | Signaling                  |

|                |   |           |        |          |          |                |                    |
|----------------|---|-----------|--------|----------|----------|----------------|--------------------|
| TCONS_00090788 | 3 | 67538288  | 0.824  | 5.00E-05 | 9.26E-04 | Dnajc10        | Transcription      |
| TCONS_00091282 | 3 | 94010474  | -0.938 | 4.50E-04 | 6.24E-03 | Cd59           | Signaling          |
| TCONS_00092417 | 3 | 148259595 | 0.997  | 1.50E-04 | 2.46E-03 | AABR07054332.1 |                    |
| TCONS_00092653 | 3 | 153333218 | 0.587  | 5.00E-04 | 6.80E-03 | Rpn2           | Golgi              |
| TCONS_00092858 | 3 | 161018510 | 1.653  | 5.00E-05 | 9.26E-04 | Wfdc2          | Signaling          |
| TCONS_00092993 | 3 | 164424514 | 0.765  | 5.50E-04 | 7.37E-03 | Cebpb          | Transcription      |
| TCONS_00093385 | 3 | 2438088   | 0.808  | 7.00E-04 | 8.95E-03 | Tubb4b         | Cytoskeleton       |
| TCONS_00093584 | 3 | 4341248   | 0.91   | 5.00E-05 | 9.26E-04 | LOC684988      | Translation        |
| TCONS_00093774 | 3 | 9858629   | -1.181 | 5.00E-04 | 6.80E-03 | Fnbp1          | Signaling          |
| TCONS_00095212 | 3 | 82924686  | 0.829  | 1.50E-04 | 2.46E-03 | Hsd17b12       | Metabolism         |
| TCONS_00095292 | 3 | 93379873  | 0.755  | 4.50E-04 | 6.24E-03 | Cat            | Metabolism         |
| TCONS_00095364 | 3 | 94990067  | 0.643  | 1.00E-04 | 1.72E-03 | Eif3m          | Translation        |
| TCONS_00095973 | 3 | 121147546 | 1.896  | 3.50E-04 | 5.07E-03 | Anapc1         | Cell Cycle         |
| TCONS_00096581 | 3 | 150587832 | 0.786  | 2.00E-04 | 3.15E-03 | Ahcy           |                    |
| TCONS_00096711 | 3 | 152381664 | 0.884  | 5.00E-05 | 9.26E-04 | Scand1         | Transcription      |
| TCONS_00097431 | 3 | 5154295   |        | 5.00E-05 | 9.26E-04 | -              |                    |
| TCONS_00097743 | 3 | 30019196  |        | 9.50E-04 | 1.14E-02 | -              |                    |
| TCONS_00097784 | 3 | 35539509  |        | 8.50E-04 | 1.05E-02 | -              |                    |
| TCONS_00097857 | 3 | 37920298  |        | 7.50E-04 | 9.47E-03 | -              |                    |
| TCONS_00098613 | 3 | 93172252  |        | 5.00E-05 | 9.26E-04 | -              |                    |
| TCONS_00098977 | 3 | 117510450 | 0.896  | 6.00E-04 | 7.89E-03 | -              |                    |
| TCONS_00099581 | 3 | 136572223 |        | 9.50E-04 | 1.14E-02 | -              |                    |
| TCONS_00099860 | 3 | 149039192 |        | 9.50E-04 | 1.14E-02 | -              |                    |
| TCONS_00099964 | 3 | 156275632 |        | 1.00E-04 | 1.72E-03 | -              |                    |
| TCONS_00100103 | 3 | 160926496 |        | 5.00E-05 | 9.26E-04 | -              |                    |
| TCONS_00100206 | 3 | 165669981 |        | 5.00E-05 | 9.26E-04 | -              |                    |
| TCONS_00100515 | 3 | 175788540 |        | 5.00E-05 | 9.26E-04 | -              |                    |
| TCONS_00100528 | 3 | 176668514 |        | 6.00E-04 | 7.89E-03 | -              |                    |
| TCONS_00100703 | 4 | 6022893   | 0.78   | 5.00E-04 | 6.80E-03 | LOC100363537   |                    |
| TCONS_00101075 | 4 | 27175242  | 0.951  | 3.00E-04 | 4.46E-03 | Cyp51          | Electron Transport |
| TCONS_00101242 | 4 | 44321882  | -0.933 | 5.50E-04 | 7.37E-03 | Tes            | Cytoskeleton       |
| TCONS_00101454 | 4 | 62103561  | -1.523 | 5.00E-05 | 9.26E-04 | Cald1          | Metabolism         |
| TCONS_00101856 | 4 | 84478838  | 1.131  | 5.00E-05 | 9.26E-04 | Prr15          |                    |
| TCONS_00101993 | 4 | 96659083  | -1.96  | 3.50E-04 | 5.07E-03 | Prdm5          | Transcription      |
| TCONS_00102436 | 4 | 118852061 | 0.694  | 4.50E-04 | 6.24E-03 | Gfpt1          | Metabolism         |
| TCONS_00102456 | 4 | 119997267 | 0.586  | 8.00E-04 | 9.98E-03 | Rpn1           | Proteolysis        |
| TCONS_00102744 | 4 | 144192988 | -1.042 | 6.50E-04 | 8.43E-03 | Lmcd1          | Development        |
| TCONS_00103175 | 4 | 157452606 | 0.82   | 5.00E-05 | 9.26E-04 | Mlf2           | Signaling          |
| TCONS_00103218 | 4 | 157563989 | 0.992  | 4.50E-04 | 6.24E-03 | Acrbp          |                    |
| TCONS_00103532 | 4 | 172119330 | 0.88   | 5.00E-05 | 9.26E-04 | Mgst1          | Metabolism         |
| TCONS_00103617 | 4 | 175431903 | -1.182 | 1.50E-04 | 2.46E-03 | Pde3a          | Signaling          |
| TCONS_00103974 | 4 | 10295121  | -1.128 | 5.00E-05 | 9.26E-04 | Fgl2           | Cytoskeleton       |
| TCONS_00103997 | 4 | 14318273  | -0.796 | 5.00E-05 | 9.26E-04 | Sema3c         | Development        |
| TCONS_00104183 | 4 | 30311737  | 1.049  | 5.00E-05 | 9.26E-04 | Pon2           | Metabolism         |
| TCONS_00104702 | 4 | 77470635  | 0.593  | 6.00E-04 | 7.89E-03 | Pdia4          | Metabolism         |
| TCONS_00105787 | 4 | 146922084 | 1.089  | 9.00E-04 | 1.10E-02 | Tamm41         |                    |
| TCONS_00105878 | 4 | 150202057 | 0.945  | 1.00E-04 | 1.72E-03 | Ret            | Signaling          |
| TCONS_00107279 | 4 | 24082582  |        | 9.00E-04 | 1.10E-02 | -              |                    |
| TCONS_00107320 | 4 | 24179198  |        | 1.00E-04 | 1.72E-03 | -              |                    |
| TCONS_00107492 | 4 | 35001455  |        | 5.00E-05 | 9.26E-04 | -              |                    |
| TCONS_00107503 | 4 | 35021942  |        | 5.00E-05 | 9.26E-04 | -              |                    |
| TCONS_00107520 | 4 | 35069188  |        | 5.00E-05 | 9.26E-04 | -              |                    |
| TCONS_00107531 | 4 | 35100755  |        | 5.00E-04 | 6.80E-03 | -              |                    |

|                |   |           |        |          |          |                |                            |
|----------------|---|-----------|--------|----------|----------|----------------|----------------------------|
| TCONS_00107541 | 4 | 35115969  |        | 5.00E-05 | 9.26E-04 | -              |                            |
| TCONS_00107553 | 4 | 35147121  |        | 5.00E-05 | 9.26E-04 | -              |                            |
| TCONS_00107654 | 4 | 44424092  |        | 2.50E-04 | 3.82E-03 | -              |                            |
| TCONS_00108304 | 4 | 87025051  |        | 5.00E-05 | 9.26E-04 | -              |                            |
| TCONS_00109683 | 4 | 159399732 |        | 6.00E-04 | 7.89E-03 | -              |                            |
| TCONS_00109920 | 4 | 170430048 |        | 6.50E-04 | 8.43E-03 | -              |                            |
| TCONS_00111073 | 5 | 62109327  | 0.864  | 5.00E-05 | 9.26E-04 | Nans           | Metabolism                 |
| TCONS_00111171 | 5 | 69833224  | 0.935  | 5.00E-05 | 9.26E-04 | Nipsnap3b      | Transport                  |
| TCONS_00111644 | 5 | 116394670 | -0.832 | 5.00E-05 | 9.26E-04 | Nfia           | Transcription              |
| TCONS_00111711 | 5 | 119596076 | -1.597 | 3.50E-04 | 5.07E-03 | -              |                            |
| TCONS_00112157 | 5 | 135536412 | 0.663  | 1.50E-04 | 2.46E-03 | Prdx1          | Electron Transport         |
| TCONS_00112571 | 5 | 145188322 | 0.906  | 5.00E-04 | 6.80E-03 | Zmym6nb        |                            |
| TCONS_00112647 | 5 | 147288722 | 0.985  | 5.00E-04 | 6.80E-03 | Tmem54         |                            |
| TCONS_00112974 | 5 | 154269117 | 0.679  | 1.00E-04 | 1.72E-03 | Fuca1          | Metabolism                 |
| TCONS_00113137 | 5 | 157759415 | 1.139  | 5.00E-05 | 9.26E-04 | Akr7a2         | Metabolism                 |
| TCONS_00113190 | 5 | 159428514 | 1.374  | 5.00E-05 | 9.26E-04 | Padi2          | Translation                |
| TCONS_00113871 | 5 | 5999474   | -0.779 | 4.50E-04 | 6.24E-03 | Sulf1          | Metabolism                 |
| TCONS_00114248 | 5 | 39560452  | -1.429 | 5.00E-05 | 9.26E-04 | Fhl5           | Transcription              |
| TCONS_00114480 | 5 | 58197679  | -0.871 | 1.00E-04 | 1.72E-03 | Ccl21          | Growth Factors & Cytokines |
| TCONS_00114497 | 5 | 58472549  | 0.916  | 5.00E-04 | 6.80E-03 | Stoml2         | Cytoskeleton               |
| TCONS_00114620 | 5 | 60969740  | -0.64  | 1.00E-04 | 1.72E-03 | Shb            |                            |
| TCONS_00114816 | 5 | 74997842  | 0.648  | 7.00E-04 | 8.95E-03 | LOC685849      |                            |
| TCONS_00114995 | 5 | 78380815  | 0.768  | 8.50E-04 | 1.05E-02 | Pole3          | Transcription              |
| TCONS_00115189 | 5 | 102407422 | -1.438 | 2.50E-04 | 3.82E-03 | Bnc2           | Development                |
| TCONS_00115196 | 5 | 102407422 | -2.089 | 5.00E-05 | 9.26E-04 | Bnc2           | Development                |
| TCONS_00115459 | 5 | 127505613 | 0.741  | 1.00E-04 | 1.72E-03 | Cpt2           | Metabolism                 |
| TCONS_00115657 | 5 | 136020940 | 0.604  | 4.50E-04 | 6.24E-03 | Rps8           | Transcription              |
| TCONS_00116294 | 5 | 152195360 | 0.688  | 5.00E-05 | 9.26E-04 | Hmgn2          | Transcription              |
| TCONS_00116785 | 5 | 164886812 | 0.732  | 1.00E-04 | 1.72E-03 | Agtrap         | Receptor                   |
| TCONS_00117899 | 5 | 44419469  |        | 5.00E-05 | 9.26E-04 | -              |                            |
| TCONS_00118564 | 5 | 86111304  |        | 1.50E-04 | 2.46E-03 | -              |                            |
| TCONS_00118574 | 5 | 86153100  |        | 5.00E-05 | 9.26E-04 | -              |                            |
| TCONS_00118576 | 5 | 86165730  |        | 6.50E-04 | 8.43E-03 | -              |                            |
| TCONS_00118585 | 5 | 86192772  |        | 9.50E-04 | 1.14E-02 | -              |                            |
| TCONS_00118593 | 5 | 86229557  |        | 1.00E-04 | 1.72E-03 | -              |                            |
| TCONS_00120363 | 6 | 788547    | -1.977 | 5.00E-05 | 9.26E-04 | Crim1          | Development                |
| TCONS_00120364 | 6 | 788547    | -1.465 | 8.00E-04 | 9.98E-03 | Crim1          | Development                |
| TCONS_00120494 | 6 | 7793734   | -1.879 | 8.50E-04 | 1.05E-02 | Plekhh2        | Signaling                  |
| TCONS_00121498 | 6 | 80159363  | -0.794 | 5.00E-05 | 9.26E-04 | Pnn            | Translation                |
| TCONS_00121815 | 6 | 99282849  | 0.665  | 6.50E-04 | 8.43E-03 | Mthfd1         | Metabolism                 |
| TCONS_00122392 | 6 | 128738387 | 0.823  | 1.00E-04 | 1.72E-03 | AABR07065438.1 |                            |
| TCONS_00123280 | 6 | 25267969  | -1.881 | 2.50E-04 | 3.82E-03 | Srd5a2         | Metabolism                 |
| TCONS_00123449 | 6 | 29178857  | -1.777 | 5.00E-05 | 9.26E-04 | Klhl29         | Transcription              |
| TCONS_00123532 | 6 | 31049747  | 0.987  | 5.00E-05 | 9.26E-04 | -              |                            |
| TCONS_00124247 | 6 | 92597705  | 1.066  | 5.00E-05 | 9.26E-04 | Pygl           | Metabolism                 |
| TCONS_00124346 | 6 | 99845953  | 0.955  | 5.00E-05 | 9.26E-04 | Rab15          | Signaling                  |
| TCONS_00124532 | 6 | 108467409 | 1.063  | 5.00E-05 | 9.26E-04 | Npc2           |                            |
| TCONS_00124558 | 6 | 109169740 | 0.728  | 1.00E-04 | 1.72E-03 | Tmed10         | Metabolism                 |
| TCONS_00126300 | 6 | 32161840  |        | 5.00E-05 | 9.26E-04 | -              |                            |
| TCONS_00127125 | 6 | 80440633  |        | 2.50E-04 | 3.82E-03 | -              |                            |
| TCONS_00128265 | 6 | 137253247 |        | 7.00E-04 | 8.95E-03 | -              |                            |
| TCONS_00128575 | 7 | 2504694   | 0.717  | 5.00E-05 | 9.26E-04 | Atp5b          | Transport                  |
| TCONS_00128825 | 7 | 11321056  | 0.811  | 5.00E-05 | 9.26E-04 | Mrpl54         | Translation                |

|                |   |           |        |          |          |                |                            |
|----------------|---|-----------|--------|----------|----------|----------------|----------------------------|
| TCONS_00128838 | 7 | 11545023  | 0.78   | 5.50E-04 | 7.37E-03 | Slc39a3        | Transport                  |
| TCONS_00129316 | 7 | 29282304  | 0.634  | 4.00E-04 | 5.66E-03 | Arl1           | Signaling                  |
| TCONS_00129441 | 7 | 38742050  | -0.805 | 5.00E-05 | 9.26E-04 | Dcn            | Cytoskeleton               |
| TCONS_00129443 | 7 | 38819770  | -0.86  | 5.00E-05 | 9.26E-04 | Lum            | Receptor                   |
| TCONS_00129498 | 7 | 42269783  | -0.946 | 5.00E-04 | 6.80E-03 | Kitlg          | Growth Factors & Cytokines |
| TCONS_00129632 | 7 | 58446923  | -1.843 | 5.00E-05 | 9.26E-04 | A930009A15Rik  |                            |
| TCONS_00129638 | 7 | 58814529  | 0.62   | 4.50E-04 | 6.24E-03 | Tspan8         | Cytoskeleton               |
| TCONS_00129659 | 7 | 60654349  | -0.911 | 2.00E-04 | 3.15E-03 | Cpm            | Proteolysis                |
| TCONS_00129694 | 7 | 63094910  | -0.762 | 5.00E-05 | 9.26E-04 | Wif1           | Signaling                  |
| TCONS_00129720 | 7 | 65616176  | 1.32   | 5.00E-05 | 9.26E-04 | Gns            | Metabolism                 |
| TCONS_00129908 | 7 | 72924798  | 0.72   | 3.00E-04 | 4.46E-03 | Laptm4b        | Proteolysis                |
| TCONS_00130101 | 7 | 94130851  | 0.749  | 2.50E-04 | 3.82E-03 | Mal2           | Immune                     |
| TCONS_00130103 | 7 | 94375019  | 0.942  | 1.50E-04 | 2.46E-03 | Nov            | Development                |
| TCONS_00130447 | 7 | 117304741 | 0.705  | 8.00E-04 | 9.98E-03 | Grina          | Receptor                   |
| TCONS_00130530 | 7 | 118507223 | -2.923 | 5.00E-05 | 9.26E-04 | Rpl8           | Transcription              |
| TCONS_00130657 | 7 | 121107530 | 0.907  | 7.50E-04 | 9.47E-03 | Apobec3b       | Metabolism                 |
| TCONS_00130667 | 7 | 121311014 | -1.856 | 5.00E-05 | 9.26E-04 | Syngn1         | Development                |
| TCONS_00131068 | 7 | 130472550 | -1.385 | 6.50E-04 | 8.43E-03 | Shank3         | Signaling                  |
| TCONS_00131249 | 7 | 141249043 | 1.134  | 5.00E-04 | 6.80E-03 | Aqp5           | Transport                  |
| TCONS_00131259 | 7 | 141378535 | 0.817  | 4.50E-04 | 6.24E-03 | Cox14          |                            |
| TCONS_00131306 | 7 | 141973552 | 0.814  | 2.00E-04 | 3.15E-03 | Mettl7a        | Epigenetic                 |
| TCONS_00131445 | 7 | 143881999 | 0.759  | 9.00E-04 | 1.10E-02 | Mfsd5          | Unknown                    |
| TCONS_00131710 | 7 | 2972899   | 0.612  | 1.00E-04 | 1.72E-03 | Rpl41          |                            |
| TCONS_00131932 | 7 | 11401500  | 0.656  | 2.50E-04 | 3.82E-03 | Eef2           | Translation                |
| TCONS_00132131 | 7 | 12875536  | 0.745  | 5.00E-05 | 9.26E-04 | Bsg            | Unknown                    |
| TCONS_00132377 | 7 | 23403890  | -1.26  | 5.00E-05 | 9.26E-04 | Timp3          | Proteolysis                |
| TCONS_00132712 | 7 | 51404918  | -1.105 | 3.00E-04 | 4.46E-03 | Ppp1r12a       | Signaling                  |
| TCONS_00132929 | 7 | 62850514  | -1.983 | 5.00E-05 | 9.26E-04 | Msr3           | Metabolism                 |
| TCONS_00132947 | 7 | 63513761  | -0.702 | 5.50E-04 | 7.37E-03 | Rassf3         | Signaling                  |
| TCONS_00133396 | 7 | 90085213  | -1.196 | 3.50E-04 | 5.07E-03 | Trps1          | Development                |
| TCONS_00133409 | 7 | 92605727  | -1.2   | 5.00E-05 | 9.26E-04 | Ext1           | Metabolism                 |
| TCONS_00133474 | 7 | 98063734  | -0.738 | 5.00E-05 | 9.26E-04 | Fbxo32         | Transcription              |
| TCONS_00133621 | 7 | 107734131 | -1.473 | 5.00E-05 | 9.26E-04 | Ndr3           | Transcription              |
| TCONS_00133785 | 7 | 116949878 | 1.009  | 5.00E-05 | 9.26E-04 | Pycrl          | Metabolism                 |
| TCONS_00133977 | 7 | 118685021 | -0.724 | 2.00E-04 | 3.15E-03 | LOC100911597   | Cytoskeleton               |
| TCONS_00133998 | 7 | 119616323 | 0.829  | 1.00E-04 | 1.72E-03 | Tst            | Metabolism                 |
| TCONS_00135646 | 7 | 32540611  |        | 3.50E-04 | 5.07E-03 | -              |                            |
| TCONS_00137627 | 7 | 121648876 |        | 1.50E-04 | 2.46E-03 | -              |                            |
| TCONS_00138079 | 8 | 6013206   | -1.861 | 5.50E-04 | 7.37E-03 | Birc3          | Apoptosis                  |
| TCONS_00138778 | 8 | 45788896  | -1.379 | 5.00E-05 | 9.26E-04 | AABR07070046.1 |                            |
| TCONS_00138969 | 8 | 52829084  | 0.926  | 6.00E-04 | 7.89E-03 | RGD1563941     |                            |
| TCONS_00139015 | 8 | 55178288  | -1.947 | 1.50E-04 | 2.46E-03 | Cryab          | Development                |
| TCONS_00139224 | 8 | 62298357  | 0.789  | 2.00E-04 | 3.15E-03 | Cox5a          | Metabolism                 |
| TCONS_00139426 | 8 | 69121681  | 0.638  | 2.00E-04 | 3.15E-03 | Rpl4           | Unknown                    |
| TCONS_00139536 | 8 | 71786309  | 0.854  | 5.00E-05 | 9.26E-04 | Fam96a         | Unknown                    |
| TCONS_00139565 | 8 | 72741154  | 0.695  | 5.00E-05 | 9.26E-04 | Rps27l         | Transcription              |
| TCONS_00139812 | 8 | 79722333  | 0.641  | 6.00E-04 | 7.89E-03 | Rab27a         | Signaling                  |
| TCONS_00140002 | 8 | 91464228  | 0.626  | 4.50E-04 | 6.24E-03 | Bckdhb         | Metabolism                 |
| TCONS_00140332 | 8 | 115069094 | 1.059  | 3.50E-04 | 5.07E-03 | Dusp7          | Signaling                  |
| TCONS_00140335 | 8 | 115131270 | 0.794  | 5.00E-05 | 9.26E-04 | Rpl29          | Translation                |
| TCONS_00140924 | 8 | 128806128 | 0.608  | 3.00E-04 | 4.46E-03 | Rpsa           | Translation                |
| TCONS_00141219 | 8 | 6749743   | 0.829  | 5.00E-05 | 9.26E-04 | LOC100360491   |                            |
| TCONS_00141289 | 8 | 13838571  | 0.83   | 2.50E-04 | 3.82E-03 | RGD1309534     |                            |

|                |   |           |        |          |          |              |                    |
|----------------|---|-----------|--------|----------|----------|--------------|--------------------|
| TCONS_00141410 | 8 | 21911624  | 0.674  | 1.00E-04 | 1.72E-03 | Eif3g        | Translation        |
| TCONS_00141518 | 8 | 22918698  | 0.748  | 5.00E-04 | 6.80E-03 | Rab3d        | Signaling          |
| TCONS_00141627 | 8 | 31977000  | 0.815  | 5.00E-05 | 9.26E-04 | Adamts15     | Protease           |
| TCONS_00142262 | 8 | 58166989  | 0.795  | 3.00E-04 | 4.46E-03 | Acat1        | Metabolism         |
| TCONS_00142609 | 8 | 69568515  | 0.898  | 4.50E-04 | 6.24E-03 | Tmem185a     |                    |
| TCONS_00142718 | 8 | 72771472  | -1.036 | 1.50E-04 | 2.46E-03 | Tpm1         | Cytoskeleton       |
| TCONS_00143735 | 8 | 122954947 | 0.762  | 5.00E-05 | 9.26E-04 | Gpd1l        | Metabolism         |
| TCONS_00143753 | 8 | 124661838 | -1.421 | 5.00E-05 | 9.26E-04 | Rbms3        | Epigenetic         |
| TCONS_00144202 | 8 | 21001817  |        | 9.50E-04 | 1.14E-02 | -            |                    |
| TCONS_00145869 | 8 | 88603071  |        | 2.50E-04 | 3.82E-03 | -            |                    |
| TCONS_00146441 | 8 | 116066597 |        | 9.50E-04 | 1.14E-02 | -            |                    |
| TCONS_00146461 | 8 | 118327654 |        | 5.00E-05 | 9.26E-04 | -            |                    |
| TCONS_00146880 | 9 | 10339074  | 0.788  | 3.00E-04 | 4.46E-03 | Vmac         |                    |
| TCONS_00146891 | 9 | 10446698  | 0.654  | 6.00E-04 | 7.89E-03 | LOC301124    |                    |
| TCONS_00146949 | 9 | 10773333  |        | 4.00E-04 | 5.66E-03 | -            |                    |
| TCONS_00147043 | 9 | 12740884  | -1.166 | 1.00E-04 | 1.72E-03 | Rftn1        | Unknown            |
| TCONS_00147589 | 9 | 43259708  | 0.613  | 9.00E-04 | 1.10E-02 | Cox5b        | Electron Transport |
| TCONS_00147678 | 9 | 46086901  | 0.862  | 5.00E-05 | 9.26E-04 | Rpl31        | Translation        |
| TCONS_00147716 | 9 | 46656032  | -0.879 | 4.00E-04 | 5.66E-03 | Map4k4       | Signaling          |
| TCONS_00148136 | 9 | 69497120  | -1.551 | 2.00E-04 | 3.15E-03 | Nrp2         | Receptor           |
| TCONS_00148149 | 9 | 69953250  | 1.205  | 5.00E-04 | 6.80E-03 | Eef1b2       | Translation        |
| TCONS_00149070 | 9 | 119349252 | -1.945 | 5.00E-05 | 9.26E-04 | Myom1        | Unknown            |
| TCONS_00149271 | 9 | 10441258  | 0.666  | 8.00E-04 | 9.98E-03 | Rpl36        | Translation        |
| TCONS_00149314 | 9 | 10738221  | 0.717  | 8.00E-04 | 9.98E-03 | Uhrf1        | Transcription      |
| TCONS_00149521 | 9 | 16845524  | 1.184  | 1.00E-04 | 1.72E-03 | Dnph1        |                    |
| TCONS_00149558 | 9 | 17211718  | 0.846  | 5.00E-05 | 9.26E-04 | Rps2-ps6     |                    |
| TCONS_00149596 | 9 | 19469705  | 0.707  | 2.50E-04 | 3.82E-03 | Enpp5        |                    |
| TCONS_00150369 | 9 | 70735847  | -1.308 | 5.00E-05 | 9.26E-04 | Klf7         | Transcription      |
| TCONS_00151032 | 9 | 110052592 | -0.948 | 4.00E-04 | 5.66E-03 | Efna5        | Signaling          |
| TCONS_00154225 | X | 28593404  | 0.562  | 8.00E-04 | 9.98E-03 | Tmsb4x       | Cytoskeleton       |
| TCONS_00154257 | X | 32232141  | 0.768  | 3.00E-04 | 4.46E-03 | Car5b        | Metabolism         |
| TCONS_00154417 | X | 48779109  | -0.974 | 5.00E-05 | 9.26E-04 | Tmem47       | Unknown            |
| TCONS_00154695 | X | 71272041  | 0.849  | 5.00E-05 | 9.26E-04 | Gjb1         |                    |
| TCONS_00155329 | X | 123404569 | 0.827  | 5.00E-05 | 9.26E-04 | Slc25a5      | Transport          |
| TCONS_00155661 | X | 159112879 | -1.833 | 5.50E-04 | 7.37E-03 | Fhl1         | Transcription      |
| TCONS_00156277 | X | 45244037  | 1.003  | 2.00E-04 | 3.15E-03 | Pbsn         |                    |
| TCONS_00156606 | X | 72074107  | 0.538  | 6.50E-04 | 8.43E-03 | LOC100362640 | Translation        |
| TCONS_00156829 | X | 88312674  | 1.135  | 5.00E-05 | 9.26E-04 | M6pr         | Receptor           |
| TCONS_00157258 | X | 138224039 | -0.695 | 4.50E-04 | 6.24E-03 | Rap2c        | Signaling          |
| TCONS_00157389 | X | 156392629 | 0.963  | 9.00E-04 | 1.10E-02 | Fam50a       | Unknown            |
| TCONS_00157405 | X | 156438250 | 0.541  | 8.00E-04 | 9.98E-03 | RGD1563861   | Transcription      |
| TCONS_00158875 | X | 65918687  |        | 3.50E-04 | 5.07E-03 | -            |                    |
| TCONS_00159167 | X | 76092278  |        | 5.00E-04 | 6.80E-03 | -            |                    |
| TCONS_00159797 | X | 115408841 |        | 6.50E-04 | 8.43E-03 | -            |                    |
| TCONS_00160196 | X | 146983066 |        | 4.50E-04 | 6.24E-03 | -            |                    |
| TCONS_00160217 | X | 151255741 |        | 8.50E-04 | 1.05E-02 | -            |                    |
| TCONS_00160331 | X | 155865956 |        | 8.00E-04 | 9.98E-03 | -            |                    |

**Supplemental Table S11**  
**Site Table mRNA Prostate Stromal (p<0.001)**

| test_id        | Chr | Start     | log2.fold_change. | p_value  | q_value  | Gene           | Category      |
|----------------|-----|-----------|-------------------|----------|----------|----------------|---------------|
| TCONS_00001571 | 1   | 78818398  | -1.091            | 5.00E-05 | 9.26E-04 | Gng8           | Signaling     |
| TCONS_00001738 | 1   | 81750927  | 0.802             | 5.00E-05 | 9.26E-04 | Rps19          | Translation   |
| TCONS_00003148 | 1   | 154371720 | -0.807            | 5.00E-05 | 9.26E-04 | Picalm         | Transport     |
| TCONS_00003629 | 1   | 173532802 | 0.582             | 9.00E-04 | 1.10E-02 | Eif3f          | Transcription |
| TCONS_00004791 | 1   | 214428219 | 5.084             | 2.00E-04 | 3.15E-03 | LOC100911575   | Transcription |
| TCONS_00005019 | 1   | 219439952 | 0.704             | 2.00E-04 | 3.15E-03 | Ppp1ca         | Signaling     |
| TCONS_00005504 | 1   | 225753749 |                   | 5.00E-05 | 9.26E-04 | -              |               |
| TCONS_00006143 | 1   | 259739912 | -0.798            | 5.00E-05 | 9.26E-04 | Entpd1         | Metabolism    |
| TCONS_00006550 | 1   | 276617120 | -1.299            | 3.50E-04 | 5.07E-03 | Tcf7l2         | Transcription |
| TCONS_00007666 | 1   | 57318707  | 1.01              | 3.50E-04 | 5.07E-03 | Dll1           | Receptor      |
| TCONS_00008079 | 1   | 75151947  | 1.44              | 4.00E-04 | 5.66E-03 | RGD1564801     | Signaling     |
| TCONS_00008105 | 1   | 77829710  | 0.914             | 5.00E-05 | 9.26E-04 | AABR07002624.1 |               |
| TCONS_00008259 | 1   | 80618153  | 0.948             | 4.00E-04 | 5.66E-03 | Tomm40         | Metabolism    |
| TCONS_00008328 | 1   | 81885520  | -0.957            | 9.50E-04 | 1.14E-02 | Grik5          | Receptor      |
| TCONS_00008518 | 1   | 87065900  | -0.943            | 5.00E-05 | 9.26E-04 | Actn4          | Cytoskeleton  |
| TCONS_00008821 | 1   | 94346513  | 2.016             | 5.00E-05 | 9.26E-04 | Uri1           |               |
| TCONS_00009139 | 1   | 103897040 | -1.219            | 3.00E-04 | 4.46E-03 | LOC688010      |               |
| TCONS_00009403 | 1   | 128692111 | -1.735            | 1.50E-04 | 2.46E-03 | Sym            | Cytoskeleton  |
| TCONS_00009561 | 1   | 141561333 | 0.705             | 4.00E-04 | 5.66E-03 | Anpep          | Metabolism    |
| TCONS_00009697 | 1   | 146069770 | 0.881             | 7.50E-04 | 9.47E-03 | Cemip          |               |
| TCONS_00009724 | 1   | 148469770 |                   | 5.00E-05 | 9.26E-04 | -              |               |
| TCONS_00010637 | 1   | 192233909 | -1.667            | 5.00E-04 | 6.80E-03 | Prkcb          | Signaling     |
| TCONS_00011838 | 1   | 220727291 | 0.855             | 9.00E-04 | 1.10E-02 | Cst6           | Signaling     |
| TCONS_00012534 | 1   | 246380829 | -0.947            | 5.00E-05 | 9.26E-04 | Glis3          | Transcription |
| TCONS_00012629 | 1   | 252429676 | -0.749            | 1.00E-04 | 1.72E-03 | Ankrd22        | Transcription |
| TCONS_00012641 | 1   | 252976071 | -0.884            | 9.00E-04 | 1.10E-02 | Slc16a12       | Metabolism    |
| TCONS_00012725 | 1   | 259373520 | -1.585            | 7.00E-04 | 8.95E-03 | Sorbs1         | Cytoskeleton  |
| TCONS_00012751 | 1   | 259373520 | -1.35             | 8.00E-04 | 9.98E-03 | Sorbs1         | Cytoskeleton  |
| TCONS_00013102 | 1   | 275920418 | -0.979            | 1.00E-04 | 1.72E-03 | AABR07007000.1 |               |
| TCONS_00013111 | 1   | 276168629 | -1.468            | 5.00E-05 | 9.26E-04 | Gucy2g         |               |
| TCONS_00013779 | 1   | 21926037  |                   | 7.50E-04 | 9.47E-03 | -              |               |
| TCONS_00013913 | 1   | 29571894  |                   | 6.00E-04 | 7.89E-03 | -              |               |
| TCONS_00013960 | 1   | 30982079  |                   | 6.50E-04 | 8.43E-03 | -              |               |
| TCONS_00014089 | 1   | 38564539  |                   | 5.00E-04 | 6.80E-03 | -              |               |
| TCONS_00014189 | 1   | 41041331  |                   | 5.00E-05 | 9.26E-04 | -              |               |
| TCONS_00014915 | 1   | 81761684  |                   | 4.50E-04 | 6.24E-03 | -              |               |
| TCONS_00015089 | 1   | 91285268  |                   | 5.50E-04 | 7.37E-03 | -              |               |
| TCONS_00015347 | 1   | 104486176 |                   | 9.00E-04 | 1.10E-02 | -              |               |
| TCONS_00015352 | 1   | 104501749 |                   | 9.00E-04 | 1.10E-02 | -              |               |
| TCONS_00015825 | 1   | 134697025 |                   | 6.00E-04 | 7.89E-03 | -              |               |
| TCONS_00015881 | 1   | 137511778 |                   | 6.00E-04 | 7.89E-03 | -              |               |
| TCONS_00015924 | 1   | 142521201 |                   | 5.00E-04 | 6.80E-03 | -              |               |
| TCONS_00016895 | 1   | 207882902 |                   | 2.50E-04 | 3.82E-03 | -              |               |
| TCONS_00017207 | 1   | 225224397 |                   | 1.00E-04 | 1.72E-03 | -              |               |
| TCONS_00017229 | 1   | 225358161 |                   | 5.00E-05 | 9.26E-04 | -              |               |
| TCONS_00017440 | 1   | 237780513 |                   | 5.00E-04 | 6.80E-03 | -              |               |
| TCONS_00017678 | 1   | 250652788 |                   | 9.50E-04 | 1.14E-02 | -              |               |

|                |    |           |        |          |          |                |                 |
|----------------|----|-----------|--------|----------|----------|----------------|-----------------|
| TCONS_00017708 | 1  | 252790440 |        | 3.50E-04 | 5.07E-03 | -              |                 |
| TCONS_00017785 | 1  | 255534407 |        | 1.50E-04 | 2.46E-03 | -              |                 |
| TCONS_00017811 | 1  | 258180320 |        | 6.00E-04 | 7.89E-03 | -              |                 |
| TCONS_00018725 | 10 | 14722582  | -1.433 | 5.00E-05 | 9.26E-04 | Tpsb2          |                 |
| TCONS_00018875 | 10 | 18558127  | -1.657 | 5.00E-05 | 9.26E-04 | Kcnmb1         | Metabolism      |
| TCONS_00018885 | 10 | 18558127  | -1.258 | 5.00E-05 | 9.26E-04 | Kcnmb1         | Metabolism      |
| TCONS_00019004 | 10 | 34149716  | 0.629  | 2.50E-04 | 3.82E-03 | Gnb2l1         | Signaling       |
| TCONS_00019591 | 10 | 49020453  |        | 5.00E-05 | 9.26E-04 | LOC100911746   | Development     |
| TCONS_00020917 | 10 | 84031954  | 0.9    | 1.00E-04 | 1.72E-03 | Hoxb13         | Transcription   |
| TCONS_00021455 | 10 | 91710494  | 0.726  | 2.00E-04 | 3.15E-03 | Rprml          |                 |
| TCONS_00024396 | 10 | 72556081  | 1.269  | 1.50E-04 | 2.46E-03 | LOC681195      |                 |
| TCONS_00024545 | 10 | 78992579  | 0.741  | 1.00E-04 | 1.72E-03 | LOC100363469   |                 |
| TCONS_00025764 | 10 | 104521699 | 0.736  | 2.00E-04 | 3.15E-03 | LOC100360679   | Translation     |
| TCONS_00025929 | 10 | 107291934 | -0.859 | 8.00E-04 | 9.98E-03 | Usp36          |                 |
| TCONS_00026041 | 10 | 109736457 | 0.585  | 5.00E-04 | 6.80E-03 | P4hb           | Metabolism      |
| TCONS_00026336 | 10 | 6820815   |        | 4.00E-04 | 5.66E-03 | -              |                 |
| TCONS_00026472 | 10 | 15284952  |        | 5.50E-04 | 7.37E-03 | -              |                 |
| TCONS_00026752 | 10 | 32782120  |        | 2.00E-04 | 3.15E-03 | -              |                 |
| TCONS_00027453 | 10 | 64677863  |        | 2.00E-04 | 3.15E-03 | -              |                 |
| TCONS_00027734 | 10 | 83343820  |        | 3.00E-04 | 4.46E-03 | -              |                 |
| TCONS_00027769 | 10 | 84834950  |        | 5.00E-04 | 6.80E-03 | -              |                 |
| TCONS_00027968 | 10 | 94965953  |        | 6.50E-04 | 8.43E-03 | -              |                 |
| TCONS_00028698 | 11 | 33909438  | 0.868  | 5.00E-05 | 9.26E-04 | Cbr3           | Metabolism      |
| TCONS_00029316 | 11 | 64959951  |        | 4.00E-04 | 5.66E-03 | -              |                 |
| TCONS_00029405 | 11 | 69481933  | -1.465 | 5.00E-05 | 9.26E-04 | Kalrn          | Signaling       |
| TCONS_00030268 | 11 | 32378796  |        | 1.00E-04 | 1.72E-03 | -              |                 |
| TCONS_00030788 | 11 | 64962665  | 0.834  | 3.00E-04 | 4.46E-03 | Cox17          | Binding Protein |
| TCONS_00031020 | 11 | 71397382  | 1.763  | 5.00E-05 | 9.26E-04 | Tfrc           | Receptor        |
| TCONS_00031103 | 11 | 74834049  | 0.849  | 7.00E-04 | 8.95E-03 | AABR07034532.1 |                 |
| TCONS_00031740 | 11 | 13049113  |        | 5.00E-05 | 9.26E-04 | -              |                 |
| TCONS_00031802 | 11 | 13281689  |        | 5.00E-04 | 6.80E-03 | -              |                 |
| TCONS_00031992 | 11 | 20329695  |        | 1.50E-04 | 2.46E-03 | -              |                 |
| TCONS_00032046 | 11 | 25306961  |        | 8.00E-04 | 9.98E-03 | -              |                 |
| TCONS_00032670 | 11 | 57878551  |        | 6.00E-04 | 7.89E-03 | -              |                 |
| TCONS_00032672 | 11 | 57893345  |        | 9.50E-04 | 1.14E-02 | -              |                 |
| TCONS_00032821 | 11 | 60950483  |        | 5.00E-05 | 9.26E-04 | -              |                 |
| TCONS_00032826 | 11 | 60958801  |        | 9.00E-04 | 1.10E-02 | -              |                 |
| TCONS_00032838 | 11 | 60990223  |        | 4.50E-04 | 6.24E-03 | -              |                 |
| TCONS_00033108 | 11 | 75655640  |        | 8.00E-04 | 9.98E-03 | -              |                 |
| TCONS_00033381 | 11 | 89596595  |        | 2.00E-04 | 3.15E-03 | -              |                 |
| TCONS_00033400 | 11 | 90043603  |        | 9.50E-04 | 1.14E-02 | -              |                 |
| TCONS_00033671 | 12 | 5360100   | -1.011 | 6.50E-04 | 8.43E-03 | -              |                 |
| TCONS_00034868 | 12 | 47179663  | -1.357 | 5.00E-05 | 9.26E-04 | Cabp1          | Signaling       |
| TCONS_00035425 | 12 | 8746854   | 1.041  | 4.00E-04 | 5.66E-03 | Pomp           | Proteolysis     |
| TCONS_00035920 | 12 | 23839398  | -1.05  | 1.50E-04 | 2.46E-03 | Hspb1          | Signaling       |
| TCONS_00035971 | 12 | 24796271  | 0.689  | 6.00E-04 | 7.89E-03 | Metazoa_SRP    |                 |
| TCONS_00036104 | 12 | 31134800  | -1.511 | 5.00E-05 | 9.26E-04 | Adgrd1         |                 |
| TCONS_00036548 | 12 | 47138345  | 1.304  | 1.00E-04 | 1.72E-03 | Pop5           | Metabolism      |
| TCONS_00036971 | 12 | 6397165   |        | 5.00E-05 | 9.26E-04 | -              |                 |
| TCONS_00037043 | 12 | 10493442  |        | 7.50E-04 | 9.47E-03 | -              |                 |
| TCONS_00037100 | 12 | 14263223  |        | 5.00E-05 | 9.26E-04 | -              |                 |

|                |    |           |        |          |          |                    |                            |
|----------------|----|-----------|--------|----------|----------|--------------------|----------------------------|
| TCONS_00037185 | 12 | 18454144  |        | 5.00E-04 | 6.80E-03 | -                  |                            |
| TCONS_00037324 | 12 | 29246573  |        | 5.00E-05 | 9.26E-04 | -                  |                            |
| TCONS_00037463 | 12 | 38697437  |        | 6.00E-04 | 7.89E-03 | -                  |                            |
| TCONS_00038224 | 13 | 52662982  | -1.795 | 4.00E-04 | 5.66E-03 | Tnnt2              | Cytoskeleton               |
| TCONS_00038788 | 13 | 89524328  | 0.96   | 7.00E-04 | 8.95E-03 | Mpz                | Extracellular Matrix       |
| TCONS_00039254 | 13 | 111870120 | 0.866  | 3.50E-04 | 5.07E-03 | Irf6               | Transcription              |
| TCONS_00039358 | 13 | 26605425  | -0.642 | 1.00E-04 | 1.72E-03 | Bcl2               | Signaling                  |
| TCONS_00041002 | 13 | 2329893   |        | 9.50E-04 | 1.14E-02 | -                  |                            |
| TCONS_00041223 | 13 | 26427798  |        | 5.00E-05 | 9.26E-04 | -                  |                            |
| TCONS_00041326 | 13 | 35137415  |        | 5.00E-05 | 9.26E-04 | -                  |                            |
| TCONS_00041408 | 13 | 41848378  |        | 6.00E-04 | 7.89E-03 | -                  |                            |
| TCONS_00041664 | 13 | 48027009  |        | 9.00E-04 | 1.10E-02 | -                  |                            |
| TCONS_00041876 | 13 | 66251982  |        | 1.00E-04 | 1.72E-03 | -                  |                            |
| TCONS_00042372 | 13 | 92731065  |        | 5.00E-04 | 6.80E-03 | -                  |                            |
| TCONS_00042545 | 13 | 97606869  |        | 5.00E-05 | 9.26E-04 | -                  |                            |
| TCONS_00042940 | 13 | 113680061 |        | 2.00E-04 | 3.15E-03 | -                  |                            |
| TCONS_00044322 | 14 | 84482673  | -1.462 | 3.50E-04 | 5.07E-03 | Lif                | Growth Factors & Cytokines |
| TCONS_00044326 | 14 | 84482673  | -1.292 | 7.50E-04 | 9.47E-03 | Lif                | Growth Factors & Cytokines |
| TCONS_00044606 | 14 | 106008085 | -0.791 | 9.00E-04 | 1.10E-02 | Peli1              | Signaling                  |
| TCONS_00045933 | 14 | 63004406  | -0.914 | 2.50E-04 | 3.82E-03 | Ppargc1a           | Receptor                   |
| TCONS_00046118 | 14 | 80678466  | -1.179 | 5.50E-04 | 7.37E-03 | ENSRNOG00000054319 |                            |
| TCONS_00047080 | 14 | 16311532  |        | 6.00E-04 | 7.89E-03 | -                  |                            |
| TCONS_00047229 | 14 | 24370425  |        | 9.00E-04 | 1.10E-02 | -                  |                            |
| TCONS_00047325 | 14 | 32776221  |        | 8.00E-04 | 9.98E-03 | -                  |                            |
| TCONS_00047401 | 14 | 36686359  |        | 3.00E-04 | 4.46E-03 | -                  |                            |
| TCONS_00047768 | 14 | 61433497  |        | 5.00E-04 | 6.80E-03 | -                  |                            |
| TCONS_00047835 | 14 | 61563019  |        | 2.00E-04 | 3.15E-03 | -                  |                            |
| TCONS_00047844 | 14 | 61583588  |        | 1.00E-04 | 1.72E-03 | -                  |                            |
| TCONS_00048112 | 14 | 76853470  |        | 5.00E-05 | 9.26E-04 | -                  |                            |
| TCONS_00048182 | 14 | 83538394  |        | 5.00E-05 | 9.26E-04 | -                  |                            |
| TCONS_00048187 | 14 | 83548191  |        | 5.00E-04 | 6.80E-03 | -                  |                            |
| TCONS_00048402 | 14 | 103175771 |        | 5.00E-04 | 6.80E-03 | -                  |                            |
| TCONS_00048487 | 14 | 107520799 |        | 1.00E-04 | 1.72E-03 | -                  |                            |
| TCONS_00048493 | 14 | 107530134 |        | 5.00E-05 | 9.26E-04 | -                  |                            |
| TCONS_00048562 | 14 | 109947780 |        | 7.50E-04 | 9.47E-03 | -                  |                            |
| TCONS_00048577 | 14 | 110056442 |        | 1.00E-04 | 1.72E-03 | -                  |                            |
| TCONS_00048621 | 14 | 112530865 |        | 5.00E-05 | 9.26E-04 | -                  |                            |
| TCONS_00049693 | 15 | 42640145  | -0.746 | 8.00E-04 | 9.98E-03 | Clu                | Apoptosis                  |
| TCONS_00049710 | 15 | 43293879  | -1.124 | 2.00E-04 | 3.15E-03 | Adra1a             | Receptor                   |
| TCONS_00051793 | 15 | 87389609  | 1.07   | 3.00E-04 | 4.46E-03 | AABR07019083.1     |                            |
| TCONS_00052044 | 15 | 1787998   |        | 5.00E-05 | 9.26E-04 | -                  |                            |
| TCONS_00052148 | 15 | 4778309   |        | 5.00E-05 | 9.26E-04 | -                  |                            |
| TCONS_00052459 | 15 | 16571278  |        | 4.50E-04 | 6.24E-03 | -                  |                            |
| TCONS_00052761 | 15 | 34295686  |        | 5.00E-05 | 9.26E-04 | -                  |                            |
| TCONS_00052951 | 15 | 45817340  |        | 5.00E-05 | 9.26E-04 | -                  |                            |
| TCONS_00053185 | 15 | 57673747  |        | 9.00E-04 | 1.10E-02 | -                  |                            |
| TCONS_00053536 | 15 | 75056704  |        | 5.00E-05 | 9.26E-04 | -                  |                            |
| TCONS_00053902 | 15 | 94769729  |        | 5.00E-05 | 9.26E-04 | -                  |                            |
| TCONS_00054025 | 15 | 104587288 |        | 5.00E-04 | 6.80E-03 | -                  |                            |
| TCONS_00054068 | 15 | 104671781 |        | 5.00E-05 | 9.26E-04 | -                  |                            |
| TCONS_00054100 | 15 | 104757628 |        | 9.00E-04 | 1.10E-02 | -                  |                            |



|                |    |           |        |          |          |              |                            |
|----------------|----|-----------|--------|----------|----------|--------------|----------------------------|
| TCONS_00054112 | 15 | 104801347 |        | 5.00E-05 | 9.26E-04 | -            |                            |
| TCONS_00054128 | 15 | 104935757 |        | 5.00E-04 | 6.80E-03 | -            |                            |
| TCONS_00054140 | 15 | 104982744 |        | 6.00E-04 | 7.89E-03 | -            |                            |
| TCONS_00054155 | 15 | 105132343 |        | 5.00E-05 | 9.26E-04 | -            |                            |
| TCONS_00054716 | 16 | 20293228  | 0.599  | 5.50E-04 | 7.37E-03 | Rpl18a       | Translation                |
| TCONS_00055273 | 16 | 63837102  | -0.971 | 3.00E-04 | 4.46E-03 | Nrg1         | Signaling                  |
| TCONS_00055635 | 16 | 83824429  | -0.966 | 5.00E-05 | 9.26E-04 | Irs2         | Unknown                    |
| TCONS_00057143 | 16 | 3685776   |        | 2.00E-04 | 3.15E-03 | -            |                            |
| TCONS_00057383 | 16 | 21547985  |        | 5.00E-05 | 9.26E-04 | -            |                            |
| TCONS_00057539 | 16 | 33266384  |        | 2.00E-04 | 3.15E-03 | -            |                            |
| TCONS_00057687 | 16 | 41198094  |        | 5.00E-05 | 9.26E-04 | -            |                            |
| TCONS_00058319 | 16 | 73301943  |        | 6.50E-04 | 8.43E-03 | -            |                            |
| TCONS_00058424 | 16 | 77605481  |        | 9.50E-04 | 1.14E-02 | -            |                            |
| TCONS_00058750 | 17 | 4846788   | 0.74   | 3.00E-04 | 4.46E-03 | Gas1         |                            |
| TCONS_00058784 | 17 | 5739655   |        | 6.50E-04 | 8.43E-03 | -            |                            |
| TCONS_00058987 | 17 | 11953521  | -1.263 | 6.50E-04 | 8.43E-03 | Ror2         | Signaling                  |
| TCONS_00058989 | 17 | 11953521  | -1.001 | 4.50E-04 | 6.24E-03 | Ror2         | Signaling                  |
| TCONS_00060265 | 17 | 86066832  | 1.104  | 9.50E-04 | 1.14E-02 | Msrb2        |                            |
| TCONS_00060788 | 17 | 14606269  | 3.617  | 5.00E-05 | 9.26E-04 | Ogn          | Growth Factors & Cytokines |
| TCONS_00061492 | 17 | 55230297  | -0.89  | 8.50E-04 | 1.05E-02 | Svil         | Cytoskeleton               |
| TCONS_00062266 | 17 | 1512315   |        | 1.50E-04 | 2.46E-03 | -            |                            |
| TCONS_00062390 | 17 | 5474139   |        | 5.00E-05 | 9.26E-04 | -            |                            |
| TCONS_00062404 | 17 | 5831342   |        | 5.00E-04 | 6.80E-03 | -            |                            |
| TCONS_00063321 | 17 | 50651510  |        | 4.50E-04 | 6.24E-03 | -            |                            |
| TCONS_00063332 | 17 | 50676052  |        | 1.50E-04 | 2.46E-03 | -            |                            |
| TCONS_00063356 | 17 | 50716474  |        | 4.00E-04 | 5.66E-03 | -            |                            |
| TCONS_00063484 | 17 | 56647724  |        | 5.00E-05 | 9.26E-04 | -            |                            |
| TCONS_00063678 | 17 | 66082118  |        | 5.00E-05 | 9.26E-04 | -            |                            |
| TCONS_00063742 | 17 | 69723855  |        | 1.50E-04 | 2.46E-03 | -            |                            |
| TCONS_00063749 | 17 | 70071649  |        | 5.00E-04 | 6.80E-03 | -            |                            |
| TCONS_00063907 | 17 | 78007100  |        | 4.00E-04 | 5.66E-03 | -            |                            |
| TCONS_00064070 | 17 | 86413285  |        | 2.00E-04 | 3.15E-03 | -            |                            |
| TCONS_00064915 | 18 | 40542093  | 0.863  | 5.00E-05 | 9.26E-04 | 7SK          |                            |
| TCONS_00064992 | 18 | 48434651  | -0.998 | 3.50E-04 | 5.07E-03 | Prdm6        | Transcription              |
| TCONS_00065110 | 18 | 56042378  | 0.7    | 5.00E-05 | 9.26E-04 | Rps14        | Translation                |
| TCONS_00065278 | 18 | 61490030  | 0.637  | 5.00E-04 | 6.80E-03 | Sec11c       | Protease                   |
| TCONS_00065435 | 18 | 71395829  | -0.764 | 4.00E-04 | 5.66E-03 | Smad7        | Signaling                  |
| TCONS_00065476 | 18 | 74156552  | 0.604  | 3.00E-04 | 4.46E-03 | Atp5a1       | Metabolism                 |
| TCONS_00065704 | 18 | 4365428   | 0.771  | 2.50E-04 | 3.82E-03 | LOC100910109 |                            |
| TCONS_00066969 | 18 | 3700072   |        | 3.50E-04 | 5.07E-03 | -            |                            |
| TCONS_00066985 | 18 | 3834245   |        | 5.00E-05 | 9.26E-04 | -            |                            |
| TCONS_00067094 | 18 | 12696703  |        | 5.00E-05 | 9.26E-04 | -            |                            |
| TCONS_00067400 | 18 | 29877964  |        | 4.00E-04 | 5.66E-03 | -            |                            |
| TCONS_00067484 | 18 | 31725695  |        | 3.00E-04 | 4.46E-03 | -            |                            |
| TCONS_00067717 | 18 | 39288777  |        | 3.00E-04 | 4.46E-03 | -            |                            |
| TCONS_00068264 | 18 | 61956613  |        | 5.00E-05 | 9.26E-04 | -            |                            |
| TCONS_00068528 | 18 | 81888511  |        | 7.00E-04 | 8.95E-03 | -            |                            |
| TCONS_00069185 | 19 | 32112950  | -0.902 | 5.00E-05 | 9.26E-04 | Smad1        | Signaling                  |
| TCONS_00069411 | 19 | 38669229  | 0.702  | 1.00E-04 | 1.72E-03 | Cdh3         | Cytoskeleton               |
| TCONS_00069768 | 19 | 55917735  | 0.633  | 1.50E-04 | 2.46E-03 | Rpl13        | Translation                |
| TCONS_00070817 | 19 | 42753983  | -1.03  | 1.00E-04 | 1.72E-03 | Zfx3         | Transcription              |

|                |    |           |        |          |          |                |              |
|----------------|----|-----------|--------|----------|----------|----------------|--------------|
| TCONS_00071028 | 19 | 54693958  | -1.222 | 5.00E-05 | 9.26E-04 | Slc7a5         | Metabolism   |
| TCONS_00071401 | 19 | 18886915  |        | 6.50E-04 | 8.43E-03 | -              |              |
| TCONS_00071561 | 19 | 29188465  |        | 5.00E-05 | 9.26E-04 | -              |              |
| TCONS_00071583 | 19 | 30155543  |        | 9.50E-04 | 1.14E-02 | -              |              |
| TCONS_00071586 | 19 | 30165798  |        | 5.00E-05 | 9.26E-04 | -              |              |
| TCONS_00072027 | 19 | 47908556  |        | 5.00E-05 | 9.26E-04 | -              |              |
| TCONS_00072052 | 19 | 48158021  |        | 5.00E-05 | 9.26E-04 | -              |              |
| TCONS_00072164 | 19 | 54895418  |        | 4.00E-04 | 5.66E-03 | -              |              |
| TCONS_00072216 | 19 | 55015138  |        | 2.00E-04 | 3.15E-03 | -              |              |
| TCONS_00072313 | 19 | 59489821  |        | 4.00E-04 | 5.66E-03 | -              |              |
| TCONS_00072341 | 19 | 59845171  |        | 5.00E-05 | 9.26E-04 | -              |              |
| TCONS_00072955 | 2  | 44664096  | -0.803 | 4.50E-04 | 6.24E-03 | Ppap2a         | Metabolism   |
| TCONS_00075497 | 2  | 208738131 | 0.91   | 6.00E-04 | 7.89E-03 | AABR07012795.1 |              |
| TCONS_00075593 | 2  | 216863427 | 0.596  | 7.50E-04 | 9.47E-03 | Col11a1        | Cytoskeleton |
| TCONS_00075680 | 2  | 227255106 | -1.122 | 7.50E-04 | 9.47E-03 | Synpo2         | Development  |
| TCONS_00075973 | 2  | 251533646 | -0.823 | 3.00E-04 | 4.46E-03 | AABR07013701.1 |              |
| TCONS_00078601 | 2  | 187903300 | 0.755  | 8.00E-04 | 9.98E-03 | Rab25          | Signaling    |
| TCONS_00078869 | 2  | 196105568 | 1.435  | 4.00E-04 | 5.66E-03 | Selenbp1       | Receptor     |
| TCONS_00080106 | 2  | 28028     |        | 8.50E-04 | 1.05E-02 | -              |              |
| TCONS_00080120 | 2  | 161986    |        | 4.00E-04 | 5.66E-03 | -              |              |
| TCONS_00080183 | 2  | 2118771   |        | 8.00E-04 | 9.98E-03 | -              |              |
| TCONS_00080274 | 2  | 4549916   |        | 7.50E-04 | 9.47E-03 | -              |              |
| TCONS_00080578 | 2  | 13440313  |        | 4.50E-04 | 6.24E-03 | -              |              |
| TCONS_00080961 | 2  | 35612208  |        | 7.50E-04 | 9.47E-03 | -              |              |
| TCONS_00081233 | 2  | 51358178  |        | 9.00E-04 | 1.10E-02 | -              |              |
| TCONS_00081251 | 2  | 51384540  |        | 5.00E-05 | 9.26E-04 | -              |              |
| TCONS_00081739 | 2  | 83295503  |        | 5.00E-05 | 9.26E-04 | -              |              |
| TCONS_00081809 | 2  | 88366541  |        | 9.50E-04 | 1.14E-02 | -              |              |
| TCONS_00082149 | 2  | 109078882 |        | 9.00E-04 | 1.10E-02 | -              |              |
| TCONS_00082354 | 2  | 111425609 |        | 8.00E-04 | 9.98E-03 | -              |              |
| TCONS_00082374 | 2  | 111792992 |        | 1.00E-04 | 1.72E-03 | -              |              |
| TCONS_00082654 | 2  | 123976687 |        | 1.00E-04 | 1.72E-03 | -              |              |
| TCONS_00083263 | 2  | 155673380 |        | 5.50E-04 | 7.37E-03 | -              |              |
| TCONS_00083278 | 2  | 155707144 |        | 5.00E-05 | 9.26E-04 | -              |              |
| TCONS_00083431 | 2  | 166283371 |        | 5.50E-04 | 7.37E-03 | -              |              |
| TCONS_00083543 | 2  | 178949844 |        | 5.00E-04 | 6.80E-03 | -              |              |
| TCONS_00083576 | 2  | 180594585 |        | 5.00E-04 | 6.80E-03 | -              |              |
| TCONS_00083627 | 2  | 182688467 |        | 5.00E-05 | 9.26E-04 | -              |              |
| TCONS_00084228 | 2  | 218356580 |        | 8.50E-04 | 1.05E-02 | -              |              |
| TCONS_00084309 | 2  | 225433104 |        | 6.00E-04 | 7.89E-03 | -              |              |
| TCONS_00084381 | 2  | 230555141 |        | 1.00E-04 | 1.72E-03 | -              |              |
| TCONS_00084432 | 2  | 231778688 |        | 4.50E-04 | 6.24E-03 | -              |              |
| TCONS_00084914 | 2  | 260797950 |        | 3.00E-04 | 4.46E-03 | -              |              |
| TCONS_00086458 | 20 | 44679486  | -1.726 | 1.00E-04 | 1.72E-03 | Traf3ip2       | Apoptosis    |
| TCONS_00086475 | 20 | 45138362  | -1.391 | 5.00E-05 | 9.26E-04 | Slc16a10       | Transport    |
| TCONS_00086591 | 20 | 48330286  | 0.613  | 2.50E-04 | 3.82E-03 | Cd24           |              |
| TCONS_00087281 | 20 | 6515587   | 1.404  | 9.00E-04 | 1.10E-02 | Ppil1          | Immune       |
| TCONS_00087640 | 20 | 18457309  | -1.159 | 2.00E-04 | 3.15E-03 | Ipmk           | Signaling    |
| TCONS_00088619 | 20 | 20628272  |        | 1.50E-04 | 2.46E-03 | -              |              |
| TCONS_00088769 | 20 | 28493471  |        | 4.00E-04 | 5.66E-03 | -              |              |
| TCONS_00088861 | 20 | 31432612  |        | 1.50E-04 | 2.46E-03 | -              |              |

|                |    |           |        |          |          |           |                      |
|----------------|----|-----------|--------|----------|----------|-----------|----------------------|
| TCONS_00089033 | 20 | 34742410  |        | 9.00E-04 | 1.10E-02 | -         |                      |
| TCONS_00090694 | 3  | 62444295  |        | 3.00E-04 | 4.46E-03 | -         |                      |
| TCONS_00092999 | 3  | 165242117 | -2.043 | 5.00E-05 | 9.26E-04 | Nfatc2    | Transcription        |
| TCONS_00093584 | 3  | 4341248   | 0.903  | 5.00E-05 | 9.26E-04 | LOC684988 | Translation          |
| TCONS_00095120 | 3  | 80844004  | -0.847 | 5.00E-05 | 9.26E-04 | Dgkz      | Signaling            |
| TCONS_00097407 | 3  | 3974121   |        | 9.00E-04 | 1.10E-02 | -         |                      |
| TCONS_00098077 | 3  | 59073141  |        | 3.50E-04 | 5.07E-03 | -         |                      |
| TCONS_00098113 | 3  | 60637054  |        | 5.00E-04 | 6.80E-03 | -         |                      |
| TCONS_00098578 | 3  | 91066774  |        | 5.00E-04 | 6.80E-03 | -         |                      |
| TCONS_00098594 | 3  | 91959860  |        | 4.50E-04 | 6.24E-03 | -         |                      |
| TCONS_00098935 | 3  | 113975978 |        | 5.00E-05 | 9.26E-04 | -         |                      |
| TCONS_00098983 | 3  | 118636876 |        | 6.00E-04 | 7.89E-03 | -         |                      |
| TCONS_00099147 | 3  | 124223669 |        | 9.50E-04 | 1.14E-02 | -         |                      |
| TCONS_00099287 | 3  | 134578614 |        | 5.00E-05 | 9.26E-04 | -         |                      |
| TCONS_00099325 | 3  | 134679512 |        | 5.00E-05 | 9.26E-04 | -         |                      |
| TCONS_00099338 | 3  | 134854973 |        | 6.50E-04 | 8.43E-03 | -         |                      |
| TCONS_00099521 | 3  | 135887818 |        | 7.00E-04 | 8.95E-03 | -         |                      |
| TCONS_00099612 | 3  | 136635070 |        | 9.50E-04 | 1.14E-02 | -         |                      |
| TCONS_00100055 | 3  | 158503019 |        | 4.00E-04 | 5.66E-03 | -         |                      |
| TCONS_00100260 | 3  | 166830991 |        | 5.00E-05 | 9.26E-04 | -         |                      |
| TCONS_00100744 | 4  | 6559544   | -0.796 | 6.50E-04 | 8.43E-03 | Rheb      | Signaling            |
| TCONS_00101242 | 4  | 44321882  | -0.788 | 1.00E-04 | 1.72E-03 | Tes       | Cytoskeleton         |
| TCONS_00102744 | 4  | 144192988 | -1.24  | 5.00E-05 | 9.26E-04 | Lmcd1     | Development          |
| TCONS_00103532 | 4  | 172119330 | 0.808  | 5.00E-05 | 9.26E-04 | Mgst1     | Metabolism           |
| TCONS_00104054 | 4  | 22133520  | -0.935 | 6.50E-04 | 8.43E-03 | Abcb1a    | Transport            |
| TCONS_00105703 | 4  | 139165423 | 1.229  | 5.00E-05 | 9.26E-04 | 7SK       |                      |
| TCONS_00105823 | 4  | 147686489 | 0.592  | 5.50E-04 | 7.37E-03 | Rpl32     | Translation          |
| TCONS_00106099 | 4  | 157285178 | 1.521  | 5.00E-05 | 9.26E-04 | Eno2      | Metabolism           |
| TCONS_00106887 | 4  | 8398453   |        | 9.00E-04 | 1.10E-02 | -         |                      |
| TCONS_00106957 | 4  | 11782586  |        | 9.50E-04 | 1.14E-02 | -         |                      |
| TCONS_00106976 | 4  | 11818378  |        | 2.00E-04 | 3.15E-03 | -         |                      |
| TCONS_00107169 | 4  | 12475478  |        | 4.50E-04 | 6.24E-03 | -         |                      |
| TCONS_00107204 | 4  | 18470228  |        | 1.00E-04 | 1.72E-03 | -         |                      |
| TCONS_00107997 | 4  | 66150235  |        | 3.00E-04 | 4.46E-03 | -         |                      |
| TCONS_00108026 | 4  | 67387719  |        | 9.00E-04 | 1.10E-02 | -         |                      |
| TCONS_00108242 | 4  | 85355078  |        | 7.50E-04 | 9.47E-03 | -         |                      |
| TCONS_00108785 | 4  | 122520636 |        | 2.00E-04 | 3.15E-03 | -         |                      |
| TCONS_00108864 | 4  | 124117266 |        | 9.50E-04 | 1.14E-02 | -         |                      |
| TCONS_00108895 | 4  | 124425470 |        | 5.00E-05 | 9.26E-04 | -         |                      |
| TCONS_00109487 | 4  | 146405192 |        | 9.50E-04 | 1.14E-02 | -         |                      |
| TCONS_00109589 | 4  | 151966771 |        | 3.50E-04 | 5.07E-03 | -         |                      |
| TCONS_00110490 | 5  | 19284547  | -1.483 | 2.50E-04 | 3.82E-03 | Ubxn2b    | Proteolysis          |
| TCONS_00111139 | 5  | 64476316  | 1.228  | 5.00E-05 | 9.26E-04 | Col15a1   | Extracellular Matrix |
| TCONS_00113162 | 5  | 158041815 | -1.28  | 5.00E-05 | 9.26E-04 | Tas1r2    | Receptor             |
| TCONS_00113202 | 5  | 159534201 | 0.696  | 5.00E-05 | 9.26E-04 | Mfap2     | Extracellular Matrix |
| TCONS_00113263 | 5  | 160821952 |        | 5.00E-05 | 9.26E-04 | -         |                      |
| TCONS_00114620 | 5  | 60969740  | -0.679 | 2.00E-04 | 3.15E-03 | Shb       |                      |
| TCONS_00115576 | 5  | 133708227 | 1.642  | 6.00E-04 | 7.89E-03 | Foxd2     | Transcription        |
| TCONS_00115609 | 5  | 135019777 | 0.931  | 2.00E-04 | 3.15E-03 | Tspan1    | Cytoskeleton         |
| TCONS_00116353 | 5  | 153564437 | -0.808 | 5.00E-04 | 6.80E-03 | Clic4     | Transport            |
| TCONS_00116393 | 5  | 153893038 | -1.281 | 5.00E-05 | 9.26E-04 | Grhl3     | Transcription        |

|                |   |           |        |          |          |               |               |
|----------------|---|-----------|--------|----------|----------|---------------|---------------|
| TCONS_00117268 | 5 | 3103793   |        | 4.00E-04 | 5.66E-03 | -             |               |
| TCONS_00117622 | 5 | 22304456  |        | 5.00E-05 | 9.26E-04 | -             |               |
| TCONS_00117848 | 5 | 39883798  |        | 2.00E-04 | 3.15E-03 | -             |               |
| TCONS_00118396 | 5 | 74600931  |        | 5.00E-05 | 9.26E-04 | -             |               |
| TCONS_00118440 | 5 | 75685189  |        | 5.00E-05 | 9.26E-04 | -             |               |
| TCONS_00119135 | 5 | 118344641 |        | 2.00E-04 | 3.15E-03 | -             |               |
| TCONS_00119178 | 5 | 122162124 |        | 7.50E-04 | 9.47E-03 | -             |               |
| TCONS_00119257 | 5 | 125873613 |        | 2.00E-04 | 3.15E-03 | -             |               |
| TCONS_00119821 | 5 | 152952593 |        | 5.00E-05 | 9.26E-04 | -             |               |
| TCONS_00119834 | 5 | 153473890 |        | 1.50E-04 | 2.46E-03 | -             |               |
| TCONS_00120246 | 5 | 171772123 |        | 5.00E-05 | 9.26E-04 | -             |               |
| TCONS_00120310 | 5 | 172012190 |        | 8.00E-04 | 9.98E-03 | -             |               |
| TCONS_00120343 | 5 | 173278982 |        | 9.50E-04 | 1.14E-02 | -             |               |
| TCONS_00120362 | 6 | 788547    | -1.394 | 5.00E-05 | 9.26E-04 | Crim1         | Development   |
| TCONS_00120363 | 6 | 788547    | -1.576 | 5.00E-05 | 9.26E-04 | Crim1         | Development   |
| TCONS_00121595 | 6 | 91456907  | 0.976  | 5.00E-05 | 9.26E-04 | LOC102723236  |               |
| TCONS_00122477 | 6 | 132282741 | -1.881 | 5.00E-05 | 9.26E-04 | Eml1          |               |
| TCONS_00123449 | 6 | 29178857  | -0.715 | 1.50E-04 | 2.46E-03 | Khl29         | Transcription |
| TCONS_00124145 | 6 | 91455332  | 0.653  | 5.00E-05 | 9.26E-04 | Rps29         | Translation   |
| TCONS_00125506 | 6 | 6171876   |        | 4.50E-04 | 6.24E-03 | -             |               |
| TCONS_00125564 | 6 | 6679262   |        | 9.00E-04 | 1.10E-02 | -             |               |
| TCONS_00125791 | 6 | 14971107  |        | 9.00E-04 | 1.10E-02 | -             |               |
| TCONS_00125812 | 6 | 15052827  |        | 2.00E-04 | 3.15E-03 | -             |               |
| TCONS_00125823 | 6 | 15113279  |        | 1.00E-04 | 1.72E-03 | -             |               |
| TCONS_00125852 | 6 | 15323865  |        | 4.00E-04 | 5.66E-03 | -             |               |
| TCONS_00125969 | 6 | 22480631  |        | 8.00E-04 | 9.98E-03 | -             |               |
| TCONS_00126245 | 6 | 31229345  |        | 2.00E-04 | 3.15E-03 | -             |               |
| TCONS_00126514 | 6 | 45141204  |        | 5.00E-05 | 9.26E-04 | -             |               |
| TCONS_00126964 | 6 | 72216384  |        | 7.00E-04 | 8.95E-03 | -             |               |
| TCONS_00126999 | 6 | 72289812  |        | 5.00E-05 | 9.26E-04 | -             |               |
| TCONS_00127328 | 6 | 92964584  |        | 5.00E-05 | 9.26E-04 | -             |               |
| TCONS_00127462 | 6 | 96457810  |        | 5.00E-05 | 9.26E-04 | -             |               |
| TCONS_00127632 | 6 | 102646701 |        | 4.50E-04 | 6.24E-03 | -             |               |
| TCONS_00127665 | 6 | 102709701 |        | 6.50E-04 | 8.43E-03 | -             |               |
| TCONS_00127721 | 6 | 102884187 |        | 1.50E-04 | 2.46E-03 | -             |               |
| TCONS_00128100 | 6 | 128836337 |        | 9.50E-04 | 1.14E-02 | -             |               |
| TCONS_00128249 | 6 | 135890523 |        | 6.00E-04 | 7.89E-03 | -             |               |
| TCONS_00129632 | 7 | 58446923  | -1.01  | 5.00E-05 | 9.26E-04 | A930009A15Rik |               |
| TCONS_00129657 | 7 | 60282325  | 1.238  | 1.50E-04 | 2.46E-03 | Lyc2          |               |
| TCONS_00129720 | 7 | 65616176  | 1.248  | 5.00E-05 | 9.26E-04 | Gns           | Metabolism    |
| TCONS_00130101 | 7 | 94130851  | 0.944  | 5.00E-05 | 9.26E-04 | Mal2          | Immune        |
| TCONS_00130637 | 7 | 120579959 | -0.81  | 5.00E-05 | 9.26E-04 | Maff          | Transcription |
| TCONS_00130981 | 7 | 128500010 | 1.013  | 5.50E-04 | 7.37E-03 | Fam19a5       |               |
| TCONS_00131132 | 7 | 137141660 | -1.234 | 1.00E-04 | 1.72E-03 | Ano6          | Signaling     |
| TCONS_00131304 | 7 | 141973009 |        | 6.50E-04 | 8.43E-03 | -             |               |
| TCONS_00131534 | 7 | 318307    |        | 5.00E-05 | 9.26E-04 | -             |               |
| TCONS_00131710 | 7 | 2972899   | 0.604  | 7.50E-04 | 9.47E-03 | Rpl41         |               |
| TCONS_00131970 | 7 | 11777825  | -1.318 | 5.00E-05 | 9.26E-04 | Dot1l         | Epigenetic    |
| TCONS_00132929 | 7 | 62850514  | -1.084 | 8.50E-04 | 1.05E-02 | Msrb3         | Metabolism    |
| TCONS_00132947 | 7 | 63513761  | -1.064 | 5.00E-05 | 9.26E-04 | Rassf3        | Signaling     |
| TCONS_00133131 | 7 | 71472482  | 0.791  | 5.50E-04 | 7.37E-03 | Metazoa_SRP   |               |

|                |   |           |        |          |          |              |                 |
|----------------|---|-----------|--------|----------|----------|--------------|-----------------|
| TCONS_00133409 | 7 | 92605727  | -0.79  | 5.00E-05 | 9.26E-04 | Ext1         | Metabolism      |
| TCONS_00133621 | 7 | 107734131 | -0.733 | 5.00E-04 | 6.80E-03 | Ndrp1        | Transcription   |
| TCONS_00133864 | 7 | 117566367 | -0.898 | 5.00E-05 | 9.26E-04 | Dgat1        | Metabolism      |
| TCONS_00133977 | 7 | 118685021 | -0.688 | 3.00E-04 | 4.46E-03 | LOC100911597 | Cytoskeleton    |
| TCONS_00133990 | 7 | 119188184 | 0.947  | 5.50E-04 | 7.37E-03 | Eif3d        | Transcription   |
| TCONS_00134996 | 7 | 144970443 | -1.133 | 7.50E-04 | 9.47E-03 | Itga5        | Signaling       |
| TCONS_00135013 | 7 | 20892     | 1.112  | 4.50E-04 | 6.24E-03 | -            |                 |
| TCONS_00135336 | 7 | 12837650  |        | 5.00E-05 | 9.26E-04 | -            |                 |
| TCONS_00135503 | 7 | 18731550  |        | 5.50E-04 | 7.37E-03 | -            |                 |
| TCONS_00135586 | 7 | 23052184  |        | 5.00E-04 | 6.80E-03 | -            |                 |
| TCONS_00135753 | 7 | 36462286  |        | 5.00E-05 | 9.26E-04 | -            |                 |
| TCONS_00136173 | 7 | 52656341  |        | 5.00E-05 | 9.26E-04 | -            |                 |
| TCONS_00136513 | 7 | 62701029  |        | 8.50E-04 | 1.05E-02 | -            |                 |
| TCONS_00136686 | 7 | 71475182  |        | 8.50E-04 | 1.05E-02 | -            |                 |
| TCONS_00137471 | 7 | 113250699 |        | 4.00E-04 | 5.66E-03 | -            |                 |
| TCONS_00137501 | 7 | 116644512 |        | 5.00E-04 | 6.80E-03 | -            |                 |
| TCONS_00137659 | 7 | 122523760 |        | 5.00E-05 | 9.26E-04 | -            |                 |
| TCONS_00137796 | 7 | 137627454 |        | 5.00E-05 | 9.26E-04 | -            |                 |
| TCONS_00138912 | 8 | 50287949  | -0.959 | 5.00E-05 | 9.26E-04 | Sik3         | Receptor        |
| TCONS_00139015 | 8 | 55178288  | -1.035 | 5.00E-05 | 9.26E-04 | Cryab        | Development     |
| TCONS_00139097 | 8 | 59278261  | -1.588 | 1.00E-04 | 1.72E-03 | Dnaja4       | Protein Binding |
| TCONS_00139565 | 8 | 72741154  | 0.727  | 1.50E-04 | 2.46E-03 | Rps27l       | Transcription   |
| TCONS_00140335 | 8 | 115131270 | 0.639  | 2.00E-04 | 3.15E-03 | Rpl29        | Translation     |
| TCONS_00140924 | 8 | 128806128 | 0.587  | 5.50E-04 | 7.37E-03 | Rpsa         | Translation     |
| TCONS_00142534 | 8 | 66862142  | 0.674  | 5.00E-05 | 9.26E-04 | Rplp1        | Transcription   |
| TCONS_00142718 | 8 | 72771472  | -0.942 | 5.00E-05 | 9.26E-04 | Tpm1         | Cytoskeleton    |
| TCONS_00144219 | 8 | 21627131  |        | 4.00E-04 | 5.66E-03 | -            |                 |
| TCONS_00144434 | 8 | 30550227  |        | 5.00E-05 | 9.26E-04 | -            |                 |
| TCONS_00144938 | 8 | 45573455  |        | 9.50E-04 | 1.14E-02 | -            |                 |
| TCONS_00145000 | 8 | 45823702  |        | 5.00E-05 | 9.26E-04 | -            |                 |
| TCONS_00145167 | 8 | 55018307  |        | 8.00E-04 | 9.98E-03 | -            |                 |
| TCONS_00145294 | 8 | 63094263  |        | 5.00E-05 | 9.26E-04 | -            |                 |
| TCONS_00145495 | 8 | 70438960  |        | 7.00E-04 | 8.95E-03 | -            |                 |
| TCONS_00145847 | 8 | 86753224  |        | 8.50E-04 | 1.05E-02 | -            |                 |
| TCONS_00146147 | 8 | 105554247 |        | 5.00E-05 | 9.26E-04 | -            |                 |
| TCONS_00146374 | 8 | 113062811 |        | 5.00E-05 | 9.26E-04 | -            |                 |
| TCONS_00146379 | 8 | 113069151 |        | 2.00E-04 | 3.15E-03 | -            |                 |
| TCONS_00146576 | 8 | 126116812 |        | 1.50E-04 | 2.46E-03 | -            |                 |
| TCONS_00147678 | 9 | 46086901  | 1.188  | 5.00E-05 | 9.26E-04 | Rpl31        | Translation     |
| TCONS_00148043 | 9 | 66057925  | -1.251 | 5.00E-05 | 9.26E-04 | Cdk15        | Signaling       |
| TCONS_00148344 | 9 | 82053580  | 1.117  | 9.00E-04 | 1.10E-02 | Wnt10a       | Signaling       |
| TCONS_00148697 | 9 | 94702107  | -1.573 | 2.00E-04 | 3.15E-03 | Inpp5d       | Signaling       |
| TCONS_00148776 | 9 | 98072989  | 1.348  | 2.00E-04 | 3.15E-03 | Mlph         | Metabolism      |
| TCONS_00149271 | 9 | 10441258  | 0.775  | 1.00E-04 | 1.72E-03 | Rpl36        | Translation     |
| TCONS_00149558 | 9 | 17211718  | 0.927  | 5.00E-05 | 9.26E-04 | Rps2-ps6     |                 |
| TCONS_00151443 | 9 | 14635314  |        | 7.00E-04 | 8.95E-03 | -            |                 |
| TCONS_00151623 | 9 | 18832171  |        | 6.00E-04 | 7.89E-03 | -            |                 |
| TCONS_00151703 | 9 | 27363255  |        | 8.00E-04 | 9.98E-03 | -            |                 |
| TCONS_00151954 | 9 | 51181029  |        | 4.50E-04 | 6.24E-03 | -            |                 |
| TCONS_00152192 | 9 | 60787372  |        | 1.50E-04 | 2.46E-03 | -            |                 |
| TCONS_00152614 | 9 | 80797029  |        | 5.00E-05 | 9.26E-04 | -            |                 |

|                |   |           |       |          |          |                |           |
|----------------|---|-----------|-------|----------|----------|----------------|-----------|
| TCONS_00152731 | 9 | 81072298  |       | 5.00E-05 | 9.26E-04 | -              |           |
| TCONS_00152817 | 9 | 88886524  |       | 1.00E-04 | 1.72E-03 | -              |           |
| TCONS_00152829 | 9 | 89455768  |       | 2.00E-04 | 3.15E-03 | -              |           |
| TCONS_00152998 | 9 | 98386163  |       | 6.50E-04 | 8.43E-03 | -              |           |
| TCONS_00153757 | X | 10430846  | 0.906 | 5.00E-05 | 9.26E-04 | LOC100361811   |           |
| TCONS_00154313 | X | 35488135  | 1.346 | 5.00E-05 | 9.26E-04 | Metazoa_SRP    |           |
| TCONS_00155329 | X | 123404569 | 0.671 | 2.00E-04 | 3.15E-03 | Slc25a5        | Transport |
| TCONS_00156829 | X | 88312674  | 1.02  | 5.00E-05 | 9.26E-04 | M6pr           | Receptor  |
| TCONS_00157369 | X | 154916378 | 0.917 | 6.50E-04 | 8.43E-03 | AABR07042397.1 |           |
| TCONS_00157739 | X | 6035468   |       | 5.00E-05 | 9.26E-04 | -              |           |
| TCONS_00158293 | X | 31185816  |       | 2.00E-04 | 3.15E-03 | -              |           |
| TCONS_00158381 | X | 35989333  |       | 4.50E-04 | 6.24E-03 | -              |           |
| TCONS_00159017 | X | 73079436  |       | 5.00E-04 | 6.80E-03 | -              |           |
| TCONS_00159600 | X | 106407775 |       | 5.00E-05 | 9.26E-04 | -              |           |
| TCONS_00159953 | X | 135292414 |       | 7.50E-04 | 9.47E-03 | -              |           |
| TCONS_00160185 | X | 145278738 |       | 9.00E-04 | 1.10E-02 | -              |           |
| TCONS_00160351 | X | 156489842 |       | 6.00E-04 | 7.89E-03 | -              |           |

**Supplemental Table S12**

**Site Table mRNA Prostate Stromal - Epithelial Overlaps (p<0.001)**

| test_id        | Chr | Start     | Gene               | Category        |
|----------------|-----|-----------|--------------------|-----------------|
| TCONS_00001571 | 1   | 78818398  | Gng8               | Signaling       |
| TCONS_00001738 | 1   | 81750927  | Rps19              | Translation     |
| TCONS_00003148 | 1   | 154371720 | Picalm             | Transport       |
| TCONS_00005019 | 1   | 219439952 | Ppp1ca             | Signaling       |
| TCONS_00006143 | 1   | 259739912 | Entpd1             | Metabolism      |
| TCONS_00009561 | 1   | 141561333 | Anpep              | Metabolism      |
| TCONS_00009724 | 1   | 148469770 | -                  |                 |
| TCONS_00012534 | 1   | 246380829 | Glis3              | Transcription   |
| TCONS_00012629 | 1   | 252429676 | Ankrd22            | Transcription   |
| TCONS_00018875 | 10  | 18558127  | Kcnmb1             | Metabolism      |
| TCONS_00019004 | 10  | 34149716  | Gnb2l1             | Signaling       |
| TCONS_00020917 | 10  | 84031954  | Hoxb13             | Transcription   |
| TCONS_00021455 | 10  | 91710494  | Rprml              |                 |
| TCONS_00024545 | 10  | 78992579  | LOC100363469       |                 |
| TCONS_00025764 | 10  | 104521699 | LOC100360679       | Translation     |
| TCONS_00026041 | 10  | 109736457 | P4hb               | Metabolism      |
| TCONS_00028698 | 11  | 33909438  | Cbr3               | Metabolism      |
| TCONS_00030788 | 11  | 64962665  | Cox17              | Binding Protein |
| TCONS_00035920 | 12  | 23839398  | Hspb1              | Signaling       |
| TCONS_00036104 | 12  | 31134800  | Adgrd1             |                 |
| TCONS_00039358 | 13  | 26605425  | Bcl2               | Signaling       |
| TCONS_00044606 | 14  | 106008085 | Peli1              | Signaling       |
| TCONS_00045933 | 14  | 63004406  | Ppargc1a           | Receptor        |
| TCONS_00046118 | 14  | 80678466  | ENSRNOG00000054319 |                 |
| TCONS_00049693 | 15  | 42640145  | Clu                | Apoptosis       |
| TCONS_00054716 | 16  | 20293228  | Rpl18a             | Translation     |
| TCONS_00055635 | 16  | 83824429  | Irs2               | Unknown         |
| TCONS_00058989 | 17  | 11953521  | Ror2               | Signaling       |
| TCONS_00065110 | 18  | 56042378  | Rps14              | Translation     |
| TCONS_00065278 | 18  | 61490030  | Sec11c             | Protease        |
| TCONS_00065435 | 18  | 71395829  | Smad7              | Signaling       |
| TCONS_00065476 | 18  | 74156552  | Atp5a1             | Metabolism      |
| TCONS_00065704 | 18  | 4365428   | LOC100910109       |                 |
| TCONS_00069185 | 19  | 32112950  | Smad1              | Signaling       |
| TCONS_00075680 | 2   | 227255106 | Synpo2             | Development     |
| TCONS_00075973 | 2   | 251533646 | AABR07013701.1     |                 |
| TCONS_00078601 | 2   | 187903300 | Rab25              | Signaling       |
| TCONS_00093584 | 3   | 4341248   | LOC684988          | Translation     |
| TCONS_00101242 | 4   | 44321882  | Tes                | Cytoskeleton    |
| TCONS_00102744 | 4   | 144192988 | Lmcd1              | Development     |

|                |   |           |               |               |
|----------------|---|-----------|---------------|---------------|
| TCONS_00103532 | 4 | 172119330 | Mgst1         | Metabolism    |
| TCONS_00114620 | 5 | 60969740  | Shb           |               |
| TCONS_00120363 | 6 | 788547    | Crim1         | Development   |
| TCONS_00123449 | 6 | 29178857  | Klhl29        | Transcription |
| TCONS_00129632 | 7 | 58446923  | A930009A15Rik |               |
| TCONS_00129720 | 7 | 65616176  | Gns           | Metabolism    |
| TCONS_00130101 | 7 | 94130851  | Mal2          | Immune        |
| TCONS_00131710 | 7 | 2972899   | Rpl41         |               |
| TCONS_00132929 | 7 | 62850514  | Msrb3         | Metabolism    |
| TCONS_00132947 | 7 | 63513761  | Rassf3        | Signaling     |
| TCONS_00133409 | 7 | 92605727  | Ext1          | Metabolism    |
| TCONS_00133621 | 7 | 107734131 | Ndrp1         | Transcription |
| TCONS_00133977 | 7 | 118685021 | LOC100911597  | Cytoskeleton  |
| TCONS_00139015 | 8 | 55178288  | Cryab         | Development   |
| TCONS_00139565 | 8 | 72741154  | Rps27l        | Transcription |
| TCONS_00140335 | 8 | 115131270 | Rpl29         | Translation   |
| TCONS_00140924 | 8 | 128806128 | Rpsa          | Translation   |
| TCONS_00142718 | 8 | 72771472  | Tpm1          | Cytoskeleton  |
| TCONS_00147678 | 9 | 46086901  | Rpl31         | Translation   |
| TCONS_00149271 | 9 | 10441258  | Rpl36         | Translation   |
| TCONS_00149558 | 9 | 17211718  | Rps2-ps6      |               |
| TCONS_00155329 | X | 123404569 | Slc25a5       | Transport     |
| TCONS_00156829 | X | 88312674  | M6pr          | Receptor      |



## Supplemental Table S13

### Genes previously associated with prostate disease

| Gene   | Description                                          |
|--------|------------------------------------------------------|
| Ager   | advanced glycosylation end product-specific receptor |
| Akt1   | AKT serine/threonine kinase 1                        |
| AMACR  | alpha-methylacyl-CoA racemase                        |
| ANO1   | anoctamin 1                                          |
| APC    | APC; WNT signaling pathway regulator                 |
| AR     | androgen receptor                                    |
| ATM    | ATM serine/threonine kinase                          |
| Axin2  | axin 2                                               |
| Bcl2   | BCL2, apoptosis regulator                            |
| Bmp2   | bone morphogenetic protein 2                         |
| Bmp7   | bone morphogenetic protein 7                         |
| BRCA2  | BRCA2; DNA repair associated                         |
| CBX7   | chromobox 7                                          |
| CCND2  | cyclin D2                                            |
| CCR2   | C-C motif chemokine receptor 2                       |
| CDC27  | cell division cycle 27                               |
| CDH1   | cadherin 1                                           |
| CHD1   | chromodomain helicase DNA binding protein 1          |
| Ctnnb1 | catenin beta 1                                       |
| CXCL1  | C-X-C motif chemokine ligand 1                       |
| CXCL12 | C-X-C motif chemokine ligand 12                      |
| CXCL2  | C-X-C motif chemokine ligand 2                       |
| CXCL5  | C-X-C motif chemokine ligand 5                       |
| CXCL6  | C-X-C motif chemokine ligand 6                       |
| CXCR1  | C-X-C motif chemokine receptor 1                     |
| CXCR2  | C-X-C motif chemokine receptor 2                     |
| DGKZ   | diacylglycerol kinase zeta                           |
| DLEC1  | deleted in lung and esophageal cancer 1              |
| EEF1A1 | eukaryotic translation elongation factor 1 alpha 1   |
| EGF    | epidermal growth factor                              |
| ErbB2  | erb-b2 receptor tyrosine kinase 2                    |
| ERG    | ERG; ETS transcription factor                        |
| ETS1   | ETS proto-oncogene 1, transcription factor           |
| ETV1   | ets variant 1                                        |
| ETV4   | ets variant 4                                        |
| ETV5   | ets variant 5                                        |
| Exo1   | exonuclease 1                                        |
| FGF1   | fibroblast growth factor 1                           |
| FGF10  | fibroblast growth factor 10                          |
| FGF2   | fibroblast growth factor 2                           |
| Fgf3   | fibroblast growth factor 3                           |
| FGF7   | fibroblast growth factor 7                           |

|           |                                                      |
|-----------|------------------------------------------------------|
| FGF9      | fibroblast growth factor 9                           |
| FGFR2     | fibroblast growth factor receptor 2                  |
| FLI1      | Fli-1 proto-oncogene; ETS transcription factor       |
| FolH1     | folate hydrolase 1                                   |
| FOXA1     | forkhead box A1                                      |
| FRG1      | FSHD region gene 1                                   |
| FSTL5     | follistatin-like 5                                   |
| GSTP1     | glutathione S-transferase pi 1                       |
| HES5      | hes family bHLH transcription factor 5               |
| HIF1A     | hypoxia inducible factor 1 subunit alpha             |
| HIPK2     | homeodomain interacting protein kinase 2             |
| HMGA1     | high mobility group AT-hook 1                        |
| HMGA2     | high mobility group AT-hook 2                        |
| HMGB1     | high mobility group box 1                            |
| HNRNPA2B1 | heterogeneous nuclear ribonucleoprotein A2/B1        |
| HOXC6     | homeo box C6                                         |
| HOXD3     | homeo box D3                                         |
| HRAS      | rat sarcoma viral oncogene                           |
| IDH1      | isocitrate dehydrogenase (NADP(+)) 1; cytosolic      |
| IGF1      | insulin-like growth factor 1                         |
| IGF1R     | insulin-like growth factor 1 receptor                |
| IGF2      | insulin-like growth factor 2                         |
| IGFBP2    | insulin-like growth factor binding protein 2         |
| IGFBP5    | insulin-like growth factor binding protein 5         |
| IL15      | interleukin 15                                       |
| IL17      | interleukin17                                        |
| IL1A      | interleukin 1 alpha                                  |
| IL2       | interleukin 2                                        |
| IL4       | interleukin 4                                        |
| IL6       | interleukin 6                                        |
| IL8       | interleukin 8                                        |
| Ipcef1    | interaction protein for cytohesin exchange factors 1 |
| IQGAP2    | IQ motif containing GTPase activating protein 2      |
| Jak1      | Janus kinase 1                                       |
| Jak2      | Janus kinase 2                                       |
| KDM6A     | lysine demethylase 6A                                |
| KIF5A     | kinesin family member 5A                             |
| Klf4      | Kruppel like factor 4                                |
| KLK3      | kallikrein related peptidase 3 (PSA)                 |
| KMT2C     | lysine methyltransferase 2C                          |
| KRAS      | rat sarcoma viral oncogene                           |
| Lef1      | lymphoid enhancer binding factor 1                   |
| Lin28a    | lin-28 homolog A                                     |
| Lin28c    | lin-28 homolog C                                     |
| MAP2K1    | mitogen-activated protein kinase kinase 1            |

|            |                                                                         |
|------------|-------------------------------------------------------------------------|
| MAP2K2     | mitogen-activated protein kinase kinase 2                               |
| MAPK1      | mitogen activated protein kinase 1                                      |
| miR-156    | microRNA 156                                                            |
| miR-181b   | microRNA 181b                                                           |
| miR-196a-2 | microRNA 196a-2                                                         |
| miR-21     | microRNA 21                                                             |
| MIRLET7A1  | microRNA let-7a-1                                                       |
| Mirlet7c1  | microRNA let-7c-1                                                       |
| MOB3B      | MOB kinase activator 3B                                                 |
| MT-TC      | mitochondrially encoded tRNA cysteine                                   |
| MYC        | MYC proto-oncogene; bHLH transcription factor                           |
| NRAS       | rat sarcoma viral oncogene                                              |
| Nfkb1      | nuclear factor kappa B subunit 1                                        |
| Nkx3-1     | NK3 homeobox 1                                                          |
| Nme1       | NME/NM23 nucleoside diphosphate kinase 1                                |
| Nme2       | NME/NM23 nucleoside diphosphate kinase 2                                |
| OR10H3     | olfactory receptor family 10 subfamily H member 3                       |
| OR1S2      | olfactory receptor family 1 subfamily S member 2                        |
| OR2T35     | olfactory receptor family 2 subfamily T member 35                       |
| PCA3       | prostate cancer associated 3                                            |
| PDGFA      | platelet derived growth factor subunit A                                |
| PIK3CA     | phosphatidylinositol-4;5-bisphosphate 3-kinase; catalytic subunit alpha |
| Pik3cg     | phosphatidylinositol-4,5-bisphosphate 3-kinase, catalytic subunit gamma |
| PITX2      | paired-like homeodomain 2                                               |
| PTEN       | phosphatase and tensin homolog                                          |
| Ptn        | pleiotrophin (HARP)                                                     |
| PYHIN1     | pyrin and HIN domain family member 1                                    |
| Raf1       | Raf-1 proto-oncogene; serine/threonine kinase                           |
| RARB       | retinoic acid receptor; beta                                            |
| RASSF1     | Ras association domain family member 1                                  |
| RB1        | RB transcriptional corepressor 1                                        |
| SFRP1      | secreted frizzled-related protein 1                                     |
| Shh        | sonic hedgehog                                                          |
| SLC45A3    | solute carrier family 45; member 3                                      |
| SNAI1      | snail family transcriptional repressor 1                                |
| SNAI2      | snail family transcriptional repressor 2                                |
| SOX9       | SRY box 9                                                               |
| SPINK1     | serine peptidase inhibitor; Kazal type 1                                |
| SPOP       | speckle type BTB/POZ protein                                            |
| Stat1      | signal transducer and activator of transcription 1                      |
| Stat2      | signal transducer and activator of transcription 2                      |
| Stat3      | signal transducer and activator of transcription 3                      |
| Stat4      | signal transducer and activator of transcription 4                      |
| Stat5a     | signal transducer and activator of transcription 5a                     |
| Stat5b     | signal transducer and activator of transcription 5b                     |

|         |                                                       |
|---------|-------------------------------------------------------|
| Stat6   | signal transducer and activator of transcription 6    |
| TACC2   | transforming; acidic coiled-coil containing protein 2 |
| TDRD1   | tudor domain containing 1                             |
| TGFA    | transforming growth factor alpha                      |
| TGFB1   | transforming growth factor beta 1                     |
| TGFB2   | transforming growth factor beta 2                     |
| TGFB3   | transforming growth factor beta 3                     |
| TGFBR2  | transforming growth factor, beta receptor 2           |
| Thbs1   | Thrombospondin-1                                      |
| TLR2    | toll-like receptor 2                                  |
| TLR3    | toll-like receptor 3                                  |
| TLR4    | toll-like receptor 4                                  |
| TMPRSS2 | transmembrane serine protease 2                       |
| TP53    | tumor protein p53                                     |
| VEGFA   | vascular endothelial growth factor A                  |
| Wnt1    | Wnt family member 1                                   |
| Wnt10a  | Wnt family member 10A                                 |
| Wnt10b  | Wnt family member 10B                                 |
| Wnt11   | Wnt family member 11                                  |
| Wnt16   | Wnt family member 16                                  |
| Wnt2    | Wnt family member 2                                   |
| Wnt2b   | Wnt family member 2B                                  |
| Wnt3    | Wnt family member 3                                   |
| Wnt3a   | Wnt family member 3A                                  |
| Wnt4    | Wnt family member 4                                   |
| Wnt5a   | Wnt family member 5A                                  |
| Wnt5b   | Wnt family member 5B                                  |
| Wnt6    | Wnt family member 6                                   |
| Wnt7a   | Wnt family member 7A                                  |
| Wnt7b   | Wnt family member 7B                                  |
| Wnt8a   | Wnt family member 8A                                  |
| Wnt8b   | Wnt family member 8B                                  |
| Wnt9a   | Wnt family member 9A                                  |
| Wnt9b   | Wnt family member 9B                                  |
| Wt1     | Wilms tumor 1                                         |
| ZFP91   | zinc finger protein 91                                |
